# Supplementary material for: Identification of crucial extracellular genes as potential biomarkers in newly diagnosed Type 1 diabetes via integrated bioinformatics analysis
Source: PeerJ journal article supplement (doi:10.7717/peerj.18660), 2025-01-09
Supplement: Table_S1.docx [file Table_S1.docx]

**Table S1.** 422 DEGs of GSE55098

| symbol | logFC | AveExpr | t | P.Value | adj.P.Val | B | probe_id | change | ENTREZID |
| --- | --- | --- | --- | --- | --- | --- | --- | --- | --- |
| SEPTIN7 | -1.25728 | 5.09945 | -6.22026 | 2.29E-06 | 0.041227 | 4.521764 | 1565823_at | down | 989 |
| MAGT1 | -0.74337 | 8.282404 | -6.18969 | 2.46E-06 | 0.041227 | 4.461048 | 210596_at | down | 84061 |
| TSPOAP1 | -0.86015 | 7.181285 | -5.89194 | 5.04E-06 | 0.041227 | 3.862527 | 205839_s_at | down | 9256 |
| CD160 | -1.47038 | 9.32804 | -5.88382 | 5.14E-06 | 0.041227 | 3.846011 | 207840_at | down | 11126 |
| KLRD1 | -1.19063 | 10.37051 | -5.76801 | 6.81E-06 | 0.041227 | 3.609659 | 210606_x_at | down | 3824 |
| CHST12 | -0.6801 | 9.117233 | -5.75083 | 7.10E-06 | 0.041227 | 3.574446 | 218927_s_at | down | 55501 |
| MRPL20-AS1 | -0.53284 | 6.631973 | -5.72626 | 7.54E-06 | 0.041227 | 3.523992 | 225934_at | down | 148413 |
| HOPX | -1.01383 | 10.56537 | -5.60535 | 1.01E-05 | 0.046172 | 3.274638 | 211597_s_at | down | 84525 |
| ANP32A-IT1 | 0.590392 | 4.800643 | 5.506923 | 1.29E-05 | 0.047703 | 3.070285 | 220710_at | up | 80035 |
| CCL4 | -1.26889 | 10.74393 | -5.30897 | 2.10E-05 | 0.057254 | 2.655823 | 204103_at | down | 6351 |
| NKG7 | -0.76366 | 12.5514 | -5.23045 | 2.55E-05 | 0.057254 | 2.490223 | 213915_at | down | 4818 |
| CEP78 | -0.77382 | 8.72613 | -5.20599 | 2.71E-05 | 0.057254 | 2.438505 | 228774_at | down | 84131 |
| YPEL1 | -0.5987 | 7.199894 | -5.19492 | 2.79E-05 | 0.057254 | 2.415088 | 213996_at | down | 29799 |
| NPC1 | -0.72229 | 9.220229 | -5.17748 | 2.91E-05 | 0.057254 | 2.378156 | 202679_at | down | 4864 |
| RUNX3 | -0.70643 | 11.40191 | -5.14968 | 3.12E-05 | 0.057254 | 2.319241 | 204197_s_at | down | 864 |
| GNLY | -1.20066 | 12.33341 | -5.13071 | 3.27E-05 | 0.057254 | 2.278975 | 205495_s_at | down | 10578 |
| XCL1 | -0.89517 | 9.58335 | -5.12648 | 3.31E-05 | 0.057254 | 2.269996 | 206366_x_at | down | 6375 |
| TOMM22 | -0.64084 | 6.074805 | -5.08473 | 3.67E-05 | 0.057254 | 2.181282 | 229076_s_at | down | 56993 |
| TLR3 | -0.59512 | 4.288854 | -5.08121 | 3.70E-05 | 0.057254 | 2.173796 | 239587_at | down | 7098 |
| ARL4C | -0.74744 | 10.11638 | -5.06308 | 3.87E-05 | 0.057254 | 2.135223 | 202206_at | down | 10123 |
| RHOBTB3 | -0.95152 | 6.35046 | -5.04419 | 4.06E-05 | 0.057254 | 2.094982 | 225202_at | down | 22836 |
| PRF1 | -0.90786 | 12.76853 | -5.03928 | 4.11E-05 | 0.057254 | 2.084527 | 214617_at | down | 5551 |
| PRSS23 | -1.24557 | 7.721436 | -5.03902 | 4.11E-05 | 0.057254 | 2.083972 | 202458_at | down | 11098 |
| NCR3 | -0.70945 | 8.579597 | -4.994 | 4.60E-05 | 0.057254 | 1.98795 | 211583_x_at | down | 259197 |
| PDGFD | -1.18932 | 6.839743 | -4.94596 | 5.18E-05 | 0.057827 | 1.885295 | 219304_s_at | down | 80310 |
| GZMH | -1.15802 | 11.78606 | -4.93931 | 5.27E-05 | 0.057827 | 1.871089 | 210321_at | down | 2999 |
| PTPN4 | -0.74646 | 9.113435 | -4.93794 | 5.29E-05 | 0.057827 | 1.868144 | 205171_at | down | 5775 |
| PRDM1 | -0.90514 | 8.984989 | -4.87464 | 6.19E-05 | 0.062091 | 1.732595 | 228964_at | down | 639 |
| SPON2 | -1.23398 | 9.784772 | -4.8279 | 6.96E-05 | 0.062139 | 1.632316 | 218638_s_at | down | 10417 |
| NCALD | -0.89296 | 7.892675 | -4.81244 | 7.24E-05 | 0.062386 | 1.599122 | 211685_s_at | down | 83988 |
| CLIC3 | -1.1952 | 9.255811 | -4.80256 | 7.42E-05 | 0.062386 | 1.577904 | 219529_at | down | 9022 |
| LINC00944 | -0.50305 | 4.962883 | -4.78443 | 7.76E-05 | 0.063332 | 1.538927 | 243905_at | down | 387895 |
| GZMA | -0.82579 | 11.93547 | -4.74948 | 8.47E-05 | 0.064257 | 1.463771 | 205488_at | down | 3001 |
| TOGARAM2 | -0.87181 | 7.640706 | -4.74504 | 8.56E-05 | 0.064257 | 1.454213 | 236717_at | down | 165186 |
| TFDP2 | -0.5134 | 8.851651 | -4.74436 | 8.58E-05 | 0.064257 | 1.452747 | 226157_at | down | 7029 |
| C1orf21 | -0.96987 | 6.406518 | -4.65031 | 0.000109 | 0.07329 | 1.250109 | 223126_s_at | down | 81563 |
| CST7 | -0.82686 | 11.62872 | -4.62978 | 0.000114 | 0.075227 | 1.205807 | 210140_at | down | 8530 |
| ENPP5 | -1.08904 | 5.060183 | -4.62418 | 0.000116 | 0.075227 | 1.193725 | 227803_at | down | 59084 |
| GTF2IP20 | 0.518387 | 6.891668 | 4.61279 | 0.000119 | 0.07525 | 1.169144 | 227922_x_at | up | 441124 |
| KLRF1 | -1.00107 | 10.86924 | -4.59773 | 0.000124 | 0.07525 | 1.13663 | 220646_s_at | down | 51348 |
| ADGRG1 | -1.20647 | 10.48807 | -4.58859 | 0.000127 | 0.076147 | 1.116893 | 212070_at | down | 9289 |
| MATK | -0.62054 | 8.671205 | -4.57828 | 0.00013 | 0.076921 | 1.094631 | 206267_s_at | down | 4145 |
| S1PR5 | -0.72163 | 5.664477 | -4.56719 | 0.000134 | 0.077584 | 1.070672 | 221417_x_at | down | 53637 |
| SNTB2 | -0.71161 | 7.725042 | -4.55895 | 0.000137 | 0.077748 | 1.052865 | 205315_s_at | down | 6645 |
| CLUAP1 | -0.51602 | 5.712809 | -4.5105 | 0.000154 | 0.083441 | 0.948144 | 235080_at | down | 23059 |
| TIGIT | -0.59876 | 8.081142 | -4.46909 | 0.000171 | 0.08867 | 0.858583 | 240070_at | down | 201633 |
| HLA-DQA1 | -4.137 | 5.766653 | -4.45499 | 0.000177 | 0.08867 | 0.828063 | 213831_at | down | 3117 |
| SMC1A | -0.54042 | 6.805833 | -4.44794 | 0.00018 | 0.08867 | 0.812815 | 217555_at | down | 8243 |
| ADGRG5 | -0.55997 | 8.041971 | -4.444 | 0.000182 | 0.08867 | 0.80429 | 229971_at | down | 221188 |
| HLA-DQB1 | -3.98834 | 5.413522 | -4.44238 | 0.000183 | 0.08867 | 0.800785 | 209480_at | down | 3119 |
| ST3GAL6 | 0.905882 | 6.612645 | 4.439737 | 0.000184 | 0.08867 | 0.795061 | 210942_s_at | up | 10402 |
| PPP2R2B | -1.03853 | 7.161306 | -4.41049 | 0.000198 | 0.09137 | 0.731767 | 213849_s_at | down | 5521 |
| EXOSC4 | 0.511566 | 5.879476 | 4.395015 | 0.000206 | 0.093037 | 0.698259 | 91682_at | up | 54512 |
| IL2RB | -0.68799 | 11.34715 | -4.3902 | 0.000208 | 0.093395 | 0.687835 | 205291_at | down | 3560 |
| IER3IP1 | -0.61225 | 6.52996 | -4.3824 | 0.000213 | 0.093702 | 0.670956 | 211406_at | down | 51124 |
| LINC01000 | 0.805296 | 10.10413 | 4.363405 | 0.000223 | 0.094463 | 0.629819 | 227129_x_at | up | 402483 |
| CD3G | -0.74124 | 9.499913 | -4.34638 | 0.000233 | 0.09548 | 0.592945 | 206804_at | down | 917 |
| TGFBR3 | -0.99733 | 9.825256 | -4.33061 | 0.000242 | 0.09548 | 0.558811 | 226625_at | down | 7049 |
| FGFBP2 | -1.14309 | 11.24159 | -4.32725 | 0.000244 | 0.09548 | 0.551528 | 223836_at | down | 83888 |
| SMKR1 | -0.85765 | 6.285818 | -4.29371 | 0.000265 | 0.099508 | 0.478888 | 235736_at | down | 1E+08 |
| ENPP4 | -0.64887 | 8.247445 | -4.29325 | 0.000266 | 0.099508 | 0.477882 | 204160_s_at | down | 22875 |
| AKAP5 | -0.54852 | 4.896427 | -4.28853 | 0.000269 | 0.100007 | 0.46766 | 230846_at | down | 9495 |
| KLRC3 | -1.2692 | 8.501423 | -4.26495 | 0.000285 | 0.102019 | 0.416598 | 207723_s_at | down | 3823 |
| ARHGAP18 | -0.53954 | 6.337613 | -4.2646 | 0.000285 | 0.102019 | 0.415848 | 225166_at | down | 93663 |
| PDLIM7 | 0.590298 | 4.599883 | 4.223818 | 0.000316 | 0.108726 | 0.327526 | 1569149_at | up | 9260 |
| RRAS2 | -0.7857 | 8.007674 | -4.21068 | 0.000327 | 0.11004 | 0.299086 | 212589_at | down | 22800 |
| C12orf75 | -0.63281 | 9.677422 | -4.2091 | 0.000328 | 0.11004 | 0.295646 | 225105_at | down | 387882 |
| ATP11A | 0.631187 | 5.648096 | 4.197769 | 0.000337 | 0.110572 | 0.271122 | 216488_s_at | up | 23250 |
| CTSW | -0.79907 | 9.391223 | -4.19442 | 0.00034 | 0.11076 | 0.26387 | 214450_at | down | 1521 |
| CSF3R | 0.965638 | 9.283344 | 4.182113 | 0.000351 | 0.11296 | 0.237225 | 203591_s_at | up | 1441 |
| NLRP2 | -1.21071 | 6.936563 | -4.17765 | 0.000355 | 0.113006 | 0.227555 | 221690_s_at | down | 55655 |
| ARGLU1 | -0.81433 | 10.65396 | -4.16722 | 0.000364 | 0.115096 | 0.204983 | 228477_at | down | 55082 |
| PPM1A | -0.69535 | 7.568939 | -4.16394 | 0.000367 | 0.115096 | 0.197894 | 231370_at | down | 5494 |
| CCL5 | -0.65695 | 12.87329 | -4.1594 | 0.000371 | 0.115286 | 0.188068 | 204655_at | down | 6352 |
| CD226 | -0.58581 | 6.390238 | -4.128 | 0.000402 | 0.117033 | 0.120097 | 207315_at | down | 10666 |
| CACNA2D2 | -0.58941 | 7.758584 | -4.12788 | 0.000402 | 0.117033 | 0.11983 | 204811_s_at | down | 9254 |
| ELOVL6 | -0.57243 | 5.766471 | -4.12744 | 0.000402 | 0.117033 | 0.118893 | 227491_at | down | 79071 |
| PRR5L | -0.68956 | 7.970005 | -4.10969 | 0.000421 | 0.119662 | 0.080493 | 1555486_a_at | down | 79899 |
| OGFRL1 | 0.639238 | 8.220062 | 4.108056 | 0.000422 | 0.119662 | 0.076948 | 219582_at | up | 79627 |
| AGK | -0.59626 | 7.609946 | -4.08847 | 0.000444 | 0.122555 | 0.034584 | 218568_at | down | 55750 |
| C6orf62 | -1.01097 | 7.978527 | -4.08349 | 0.000449 | 0.122555 | 0.02382 | 213875_x_at | down | 81688 |
| NIPAL3 | -0.51665 | 5.831989 | -4.0562 | 0.000481 | 0.123736 | -0.0352 | 229735_s_at | down | 57185 |
| BBIP1 | -0.52011 | 8.890932 | -4.05479 | 0.000483 | 0.123736 | -0.03825 | 228993_s_at | down | 92482 |
| TTC38 | -0.71825 | 8.758535 | -4.05211 | 0.000486 | 0.123736 | -0.04404 | 218272_at | down | 55020 |
| CEBPA | 0.587593 | 9.575598 | 4.015837 | 0.000532 | 0.12642 | -0.12243 | 204039_at | up | 1050 |
| NCAM1 | -1.03683 | 7.084053 | -4.01093 | 0.000538 | 0.127423 | -0.13302 | 227394_at | down | 4684 |
| EVA1C | -0.73358 | 6.460512 | -4.00161 | 0.000551 | 0.1293 | -0.15315 | 227188_at | down | 59271 |
| LINC00528 | 0.575714 | 6.881974 | 3.997558 | 0.000557 | 0.12996 | -0.1619 | 1556072_at | up | 200298 |
| PAM | -0.5001 | 8.651778 | -3.99444 | 0.000561 | 0.12996 | -0.16863 | 212958_x_at | down | 5066 |
| PGGT1B | -0.5214 | 5.388297 | -3.98205 | 0.000579 | 0.133473 | -0.19539 | 242844_at | down | 5229 |
| B3GAT1 | -0.80286 | 7.617576 | -3.96568 | 0.000603 | 0.135664 | -0.23071 | 219521_at | down | 27087 |
| SLC4A4 | -0.69234 | 5.585399 | -3.96119 | 0.000609 | 0.135664 | -0.24041 | 203908_at | down | 8671 |
| LLGL2 | -0.59648 | 7.016277 | -3.95287 | 0.000622 | 0.135664 | -0.25836 | 203713_s_at | down | 3993 |
| KIAA1671 | -0.87339 | 7.494341 | -3.94607 | 0.000633 | 0.135664 | -0.27304 | 225525_at | down | 85379 |
| LOC100507103 | -0.62505 | 5.423311 | -3.94478 | 0.000635 | 0.135664 | -0.27581 | 236008_at | down | 1.01E+08 |
| IL18RAP | -0.80829 | 10.25539 | -3.92549 | 0.000666 | 0.13954 | -0.3174 | 207072_at | down | 8807 |
| NFATC2 | -0.5367 | 10.44056 | -3.91722 | 0.00068 | 0.140296 | -0.33524 | 226991_at | down | 4773 |
| CEP63 | 0.503766 | 7.201309 | 3.895193 | 0.000718 | 0.14228 | -0.3827 | 222151_s_at | up | 80254 |
| YME1L1 | -0.86965 | 10.22811 | -3.89428 | 0.00072 | 0.14228 | -0.38466 | 213830_at | down | 10730 |
| GZMB | -0.9537 | 11.80928 | -3.88342 | 0.00074 | 0.144198 | -0.40806 | 210164_at | down | 3002 |
| JAKMIP2 | -0.54813 | 6.354779 | -3.87376 | 0.000758 | 0.145852 | -0.42884 | 205888_s_at | down | 9832 |
| NOTCH2 | 0.53424 | 7.884512 | 3.870528 | 0.000764 | 0.14634 | -0.43581 | 210756_s_at | up | 4853 |
| ZBTB16 | -0.8186 | 8.221595 | -3.85409 | 0.000796 | 0.149477 | -0.47118 | 205883_at | down | 7704 |
| PDE4D | -0.69362 | 7.869545 | -3.84879 | 0.000806 | 0.150423 | -0.48258 | 204491_at | down | 5144 |
| ABCB1 | -0.81256 | 6.684789 | -3.84186 | 0.00082 | 0.150509 | -0.49749 | 209993_at | down | 5243 |
| CMC1 | -0.57161 | 9.551767 | -3.8223 | 0.000861 | 0.150509 | -0.53952 | 228283_at | down | 152100 |
| IL12RB1 | -0.53394 | 10.10304 | -3.79437 | 0.000923 | 0.154272 | -0.59952 | 1552584_at | down | 3594 |
| AUTS2 | -0.99157 | 9.071279 | -3.79101 | 0.00093 | 0.154777 | -0.60675 | 212599_at | down | 26053 |
| STAT4 | -0.54166 | 9.828584 | -3.78683 | 0.00094 | 0.154816 | -0.61571 | 206118_at | down | 6775 |
| CD180 | 0.573756 | 8.70741 | 3.781334 | 0.000953 | 0.155071 | -0.6275 | 206206_at | up | 4064 |
| PARP15 | -0.63759 | 6.966 | -3.77535 | 0.000967 | 0.155538 | -0.64035 | 1564310_a_at | down | 165631 |
| DTX3 | -0.52993 | 8.078603 | -3.75152 | 0.001026 | 0.157727 | -0.69144 | 235721_at | down | 196403 |
| FEZ1 | -1.06288 | 6.941615 | -3.74344 | 0.001047 | 0.158974 | -0.70875 | 203562_at | down | 9638 |
| CASP4LP | -0.69998 | 7.96656 | -3.73105 | 0.001079 | 0.162121 | -0.73529 | 240890_at | down | 643733 |
| SKAP2 | 0.598449 | 7.382609 | 3.723966 | 0.001098 | 0.162751 | -0.75046 | 204361_s_at | up | 8935 |
| CSF2RB | 0.62198 | 10.85248 | 3.715257 | 0.001122 | 0.163886 | -0.7691 | 205159_at | up | 1439 |
| SBK1 | -0.52756 | 8.127471 | -3.71091 | 0.001134 | 0.163886 | -0.7784 | 226549_at | down | 388228 |
| HPCAL1 | 0.501535 | 7.446376 | 3.705562 | 0.00115 | 0.163886 | -0.78984 | 205462_s_at | up | 3241 |
| MCL1 | -0.67596 | 8.782165 | -3.68314 | 0.001215 | 0.168239 | -0.83778 | 214057_at | down | 4170 |
| SLAMF7 | -0.65094 | 9.765136 | -3.65404 | 0.001305 | 0.173702 | -0.89991 | 222838_at | down | 57823 |
| SYT11 | -0.70765 | 6.86184 | -3.59211 | 0.00152 | 0.182943 | -1.03183 | 209198_s_at | down | 23208 |
| LRRC25 | 0.57899 | 7.846801 | 3.583533 | 0.001553 | 0.183616 | -1.05007 | 1559502_s_at | up | 126364 |
| RORA | -0.91445 | 8.03548 | -3.57949 | 0.001568 | 0.183616 | -1.05866 | 210426_x_at | down | 6095 |
| ID3 | 0.566763 | 6.760765 | 3.567792 | 0.001614 | 0.185786 | -1.08351 | 207826_s_at | up | 3399 |
| RASGEF1A | -0.56238 | 8.490195 | -3.5605 | 0.001643 | 0.186514 | -1.099 | 230563_at | down | 221002 |
| SH2D2A | -0.69748 | 8.414776 | -3.55712 | 0.001657 | 0.186514 | -1.10618 | 207351_s_at | down | 9047 |
| ENTPD1 | 0.507153 | 7.255893 | 3.552449 | 0.001676 | 0.186821 | -1.11608 | 228585_at | up | 953 |
| CD247 | -0.52869 | 11.70235 | -3.54135 | 0.001722 | 0.189085 | -1.13963 | 210031_at | down | 919 |
| KDM1B | 0.522476 | 7.200579 | 3.536551 | 0.001743 | 0.189998 | -1.1498 | 227021_at | up | 221656 |
| SH2D1B | -1.03918 | 9.103636 | -3.53238 | 0.001761 | 0.190093 | -1.15864 | 1553177_at | down | 117157 |
| SYNE2 | -0.5194 | 10.23348 | -3.53186 | 0.001763 | 0.190093 | -1.15975 | 202761_s_at | down | 23224 |
| NEAT1 | 0.568014 | 9.368443 | 3.50367 | 0.001889 | 0.196695 | -1.21942 | 225239_at | up | 283131 |
| RNF24 | 0.725378 | 8.160174 | 3.47993 | 0.002002 | 0.200924 | -1.2696 | 210706_s_at | up | 11237 |
| ZNF600 | -0.75257 | 9.537518 | -3.47321 | 0.002035 | 0.202589 | -1.28378 | 242463_x_at | down | 162966 |
| ALOX5 | 0.623796 | 8.569538 | 3.471967 | 0.002041 | 0.202589 | -1.28641 | 214366_s_at | up | 240 |
| GFOD1 | -0.53882 | 8.464733 | -3.46002 | 0.002101 | 0.206645 | -1.31161 | 219821_s_at | down | 54438 |
| CHST2 | -0.51052 | 9.417607 | -3.45572 | 0.002124 | 0.207707 | -1.32069 | 203921_at | down | 9435 |
| TTC22 | -0.54992 | 7.858785 | -3.44163 | 0.002198 | 0.209275 | -1.35037 | 235651_at | down | 55001 |
| DUSP2 | -1.27257 | 9.132074 | -3.4386 | 0.002214 | 0.209275 | -1.35676 | 204794_at | down | 1844 |
| ADGRE3 | 0.918966 | 6.406809 | 3.434854 | 0.002234 | 0.209275 | -1.36465 | 210724_at | up | 84658 |
| SLC43A3 | 0.535948 | 6.697615 | 3.431804 | 0.002251 | 0.209275 | -1.37107 | 210692_s_at | up | 29015 |
| XPO7 | -0.61219 | 6.389114 | -3.4195 | 0.00232 | 0.211105 | -1.39694 | 240168_at | down | 23039 |
| MARCKS | 0.663039 | 8.500347 | 3.417093 | 0.002333 | 0.21121 | -1.40201 | 201670_s_at | up | 4082 |
| NCK1 | -0.61413 | 6.617204 | -3.40925 | 0.002378 | 0.213462 | -1.4185 | 236922_at | down | 4690 |
| CD7 | -0.55868 | 7.341885 | -3.40546 | 0.0024 | 0.213462 | -1.42646 | 214551_s_at | down | 924 |
| HHEX | 0.521228 | 8.61692 | 3.404523 | 0.002406 | 0.213462 | -1.42843 | 204689_at | up | 3087 |
| ERBB2 | -0.55543 | 7.273735 | -3.40346 | 0.002412 | 0.213462 | -1.43067 | 216836_s_at | down | 2064 |
| IL1RN | 0.702399 | 9.054195 | 3.402789 | 0.002416 | 0.213462 | -1.43207 | 212657_s_at | up | 3557 |
| CRIM1 | -0.56079 | 6.287854 | -3.38938 | 0.002496 | 0.214883 | -1.46023 | 202551_s_at | down | 51232 |
| CCR3 | 1.219409 | 6.982432 | 3.387258 | 0.002509 | 0.214883 | -1.46467 | 208304_at | up | 1232 |
| OSBPL8 | -0.53857 | 6.445439 | -3.38405 | 0.002529 | 0.215002 | -1.47139 | 228986_at | down | 114882 |
| AQP9 | 0.987971 | 9.048635 | 3.382292 | 0.002539 | 0.215099 | -1.47509 | 205568_at | up | 366 |
| B3GNT5 | 0.819311 | 6.743013 | 3.381313 | 0.002545 | 0.215099 | -1.47714 | 225612_s_at | up | 84002 |
| OLIG1 | 0.70072 | 8.485661 | 3.380217 | 0.002552 | 0.215339 | -1.47944 | 228170_at | up | 116448 |
| TNF | -0.68706 | 5.399312 | -3.3789 | 0.00256 | 0.215364 | -1.48219 | 1563357_at | down | 7124 |
| HDGFL3 | -0.5742 | 5.760424 | -3.37232 | 0.002602 | 0.216953 | -1.49599 | 209524_at | down | 50810 |
| IKZF3 | -0.81965 | 8.324504 | -3.36644 | 0.002639 | 0.217488 | -1.5083 | 236301_at | down | 22806 |
| LGR6 | -0.6682 | 7.337626 | -3.36643 | 0.002639 | 0.217488 | -1.50832 | 227819_at | down | 59352 |
| OGT | -0.88683 | 7.985656 | -3.35577 | 0.002708 | 0.219361 | -1.53064 | 229787_s_at | down | 8473 |
| NRBF2 | 0.650256 | 8.371037 | 3.352278 | 0.002731 | 0.21968 | -1.53794 | 221803_s_at | up | 29982 |
| SAMD3 | -0.52577 | 10.05153 | -3.34854 | 0.002756 | 0.220609 | -1.54577 | 236782_at | down | 154075 |
| SRSF6 | -0.657 | 8.055195 | -3.3397 | 0.002816 | 0.220687 | -1.56425 | 206108_s_at | down | 6431 |
| MTPN | -0.65269 | 5.722447 | -3.33712 | 0.002833 | 0.220687 | -1.56964 | 223925_s_at | down | 136319 |
| F2R | -0.5525 | 7.069689 | -3.32827 | 0.002895 | 0.221363 | -1.58812 | 1569642_at | down | 2149 |
| BZW1 | -0.68071 | 7.910695 | -3.31539 | 0.002986 | 0.222455 | -1.615 | 233506_at | down | 9689 |
| KCNJ15 | 1.07266 | 6.015694 | 3.308432 | 0.003037 | 0.223171 | -1.6295 | 211806_s_at | up | 3772 |
| CMKLR1 | -0.81977 | 7.16803 | -3.30788 | 0.003041 | 0.223171 | -1.63065 | 229121_at | down | 1240 |
| TRDV3 | -0.78225 | 10.74872 | -3.30322 | 0.003076 | 0.223947 | -1.64036 | 216191_s_at | down | 28516 |
| HSPA6 | 0.862674 | 8.594302 | 3.286868 | 0.003199 | 0.228535 | -1.67439 | 117_at | up | 3310 |
| PIK3R6 | 0.530184 | 5.503725 | 3.283865 | 0.003223 | 0.228535 | -1.68064 | 1558770_a_at | up | 146850 |
| RRAGD | 0.570906 | 8.04635 | 3.279983 | 0.003253 | 0.229495 | -1.68871 | 221524_s_at | up | 58528 |
| GNAQ | 0.513282 | 8.997993 | 3.265808 | 0.003366 | 0.231315 | -1.71816 | 224862_at | up | 2776 |
| KLRB1 | -0.52971 | 12.02342 | -3.25934 | 0.003419 | 0.233082 | -1.73158 | 214470_at | down | 3820 |
| COL6A3 | 0.587629 | 5.724477 | 3.245693 | 0.003533 | 0.235293 | -1.75988 | 201438_at | up | 1293 |
| SMAGP | -0.59975 | 7.731652 | -3.24499 | 0.003539 | 0.235402 | -1.76133 | 209679_s_at | down | 57228 |
| EEF1D | -0.72451 | 7.290526 | -3.24308 | 0.003555 | 0.236202 | -1.7653 | 213087_s_at | down | 1936 |
| STEAP4 | 1.123071 | 8.396264 | 3.24183 | 0.003566 | 0.236625 | -1.76788 | 225987_at | up | 79689 |
| GZMK | -0.60187 | 10.89369 | -3.2398 | 0.003584 | 0.236997 | -1.77209 | 206666_at | down | 3003 |
| AKR1C3 | -0.99941 | 8.196675 | -3.23261 | 0.003646 | 0.238059 | -1.78697 | 209160_at | down | 8644 |
| SIGLEC17P | -0.82183 | 7.236066 | -3.23083 | 0.003662 | 0.238059 | -1.79066 | 232686_at | down | 284367 |
| TRDC | -0.71062 | 11.19313 | -3.21767 | 0.003779 | 0.241111 | -1.81786 | 217143_s_at | down | 28526 |
| DDIT4 | -0.95641 | 10.25052 | -3.21311 | 0.003821 | 0.241848 | -1.82729 | 202887_s_at | down | 54541 |
| TBX21 | -0.6744 | 9.378821 | -3.20697 | 0.003878 | 0.243328 | -1.83996 | 220684_at | down | 30009 |
| KIF13A | 0.538128 | 5.540056 | 3.187375 | 0.004064 | 0.245744 | -1.88039 | 220777_at | up | 63971 |
| CMTM2 | 1.490729 | 8.330089 | 3.173366 | 0.004203 | 0.247608 | -1.90923 | 229967_at | up | 146225 |
| EIF4B | -0.77658 | 7.859478 | -3.16968 | 0.00424 | 0.248334 | -1.91682 | 219599_at | down | 1975 |
| CREB5 | 0.629618 | 7.795568 | 3.169447 | 0.004242 | 0.248334 | -1.91729 | 229228_at | up | 9586 |
| ACOT7 | -0.54069 | 7.293156 | -3.16781 | 0.004259 | 0.248672 | -1.92065 | 208002_s_at | down | 11332 |
| COL18A1 | 0.559466 | 7.150518 | 3.163179 | 0.004306 | 0.249256 | -1.93018 | 209082_s_at | up | 80781 |
| JAK1 | -0.54471 | 6.110195 | -3.15898 | 0.00435 | 0.249287 | -1.9388 | 239695_at | down | 3716 |
| SMAD7 | -0.53466 | 7.953437 | -3.15467 | 0.004395 | 0.249482 | -1.94765 | 204790_at | down | 4092 |
| PIK3R5 | -0.56313 | 6.39409 | -3.15451 | 0.004396 | 0.249482 | -1.94799 | 227553_at | down | 23533 |
| ZNF595 | -1.05234 | 4.983477 | -3.15393 | 0.004403 | 0.249482 | -1.94918 | 227952_at | down | 152687 |
| RASGRP4 | 0.501737 | 6.707571 | 3.152362 | 0.004419 | 0.249644 | -1.9524 | 240862_at | up | 115727 |
| PCMTD1 | -0.54403 | 8.451629 | -3.15067 | 0.004437 | 0.250091 | -1.95587 | 232382_s_at | down | 115294 |
| PTGDR | -0.93578 | 6.994195 | -3.14678 | 0.004478 | 0.250188 | -1.96385 | 215894_at | down | 5729 |
| GK | 0.540698 | 6.131755 | 3.146608 | 0.00448 | 0.250188 | -1.9642 | 215977_x_at | up | 2710 |
| FFAR2 | 1.66448 | 6.272351 | 3.14535 | 0.004494 | 0.250188 | -1.96678 | 221345_at | up | 2867 |
| COLGALT2 | -0.77902 | 5.941832 | -3.14499 | 0.004497 | 0.250188 | -1.96752 | 209883_at | down | 23127 |
| SH2D1A | -0.57921 | 7.433392 | -3.13727 | 0.004581 | 0.253001 | -1.98335 | 211211_x_at | down | 4068 |
| LOC100130872 | -0.66787 | 7.597261 | -3.1318 | 0.004641 | 0.254267 | -1.99456 | 1569496_s_at | down | 1E+08 |
| IGHE | 0.752972 | 7.050039 | 3.127037 | 0.004694 | 0.254794 | -2.00431 | 1558438_a_at | up | 3497 |
| APH1A | 0.587743 | 6.583895 | 3.117203 | 0.004805 | 0.25633 | -2.02444 | 1554417_s_at | up | 51107 |
| CLK4 | -0.55217 | 4.792477 | -3.10896 | 0.004901 | 0.257636 | -2.04128 | 241403_at | down | 57396 |
| GNAL | -0.67209 | 5.414597 | -3.10032 | 0.005002 | 0.25974 | -2.05893 | 213924_at | down | 2774 |
| SIRPB1 | 0.567316 | 7.12699 | 3.098037 | 0.00503 | 0.260158 | -2.06359 | 206934_at | up | 10326 |
| ANP32E | -0.76657 | 7.838279 | -3.09647 | 0.005048 | 0.260406 | -2.06679 | 229128_s_at | down | 81611 |
| ZFX | -0.62693 | 8.192352 | -3.09519 | 0.005064 | 0.260419 | -2.06939 | 229022_at | down | 7543 |
| IGFBP3 | -0.7751 | 5.70684 | -3.091 | 0.005114 | 0.261049 | -2.07795 | 210095_s_at | down | 3486 |
| FYN | -0.51441 | 9.454396 | -3.08954 | 0.005132 | 0.261049 | -2.08092 | 212486_s_at | down | 2534 |
| MS4A3 | 1.226214 | 9.599582 | 3.087998 | 0.005151 | 0.261049 | -2.08406 | 210254_at | up | 932 |
| STAT6 | 0.507758 | 7.577225 | 3.076029 | 0.005299 | 0.263166 | -2.10844 | 201332_s_at | up | 6778 |
| CDC27 | -0.51638 | 7.04695 | -3.07395 | 0.005326 | 0.263509 | -2.11267 | 217878_s_at | down | 996 |
| IRAG1 | 0.671524 | 7.386002 | 3.063676 | 0.005457 | 0.266006 | -2.13357 | 226047_at | up | 10335 |
| FOLR1 | -0.51134 | 9.532033 | -3.05048 | 0.00563 | 0.268531 | -2.16037 | 211074_at | down | 2348 |
| CHI3L1 | 1.868867 | 5.659535 | 3.048508 | 0.005656 | 0.268568 | -2.16437 | 209395_at | up | 1116 |
| MOSPD2 | 0.509071 | 7.063778 | 3.044579 | 0.005709 | 0.26972 | -2.17234 | 64883_at | up | 158747 |
| DIP2A | -0.69609 | 6.108566 | -3.04125 | 0.005754 | 0.27025 | -2.17908 | 1555301_a_at | down | 23181 |
| MCOLN2 | -0.62657 | 8.403982 | -3.03981 | 0.005774 | 0.270288 | -2.18201 | 230110_at | down | 255231 |
| ITGB8 | 0.630148 | 4.529261 | 3.03618 | 0.005824 | 0.271808 | -2.18936 | 226189_at | up | 3696 |
| KLRG1 | -0.73614 | 9.070915 | -3.03547 | 0.005834 | 0.271808 | -2.1908 | 210288_at | down | 10219 |
| CLC | 0.820233 | 11.51805 | 3.034194 | 0.005851 | 0.271808 | -2.19338 | 206207_at | up | 1178 |
| CCDC65 | -0.51273 | 7.609206 | -3.03022 | 0.005906 | 0.272513 | -2.20143 | 1552321_a_at | down | 85478 |
| IFNG | -1.05365 | 7.655877 | -3.02795 | 0.005938 | 0.27305 | -2.20603 | 210354_at | down | 3458 |
| CELF2 | -0.63029 | 6.954849 | -3.02617 | 0.005963 | 0.27305 | -2.20963 | 1556323_at | down | 10659 |
| WDFY3 | 0.682403 | 6.525125 | 3.02369 | 0.005998 | 0.27305 | -2.21464 | 212602_at | up | 23001 |
| DTX4 | 0.560024 | 6.483472 | 3.011107 | 0.006179 | 0.274253 | -2.24007 | 212611_at | up | 23220 |
| ATP6V0E1 | -0.51834 | 9.132765 | -3.011 | 0.00618 | 0.274253 | -2.2403 | 214149_s_at | down | 8992 |
| IGKV1D-8 | 0.747265 | 5.81361 | 3.009885 | 0.006197 | 0.274253 | -2.24254 | 216517_at | up | 28904 |
| MBOAT7 | 0.58626 | 9.481597 | 2.974619 | 0.006733 | 0.282518 | -2.31359 | 209179_s_at | up | 79143 |
| SLC25A37 | 1.063621 | 7.671474 | 2.970238 | 0.006802 | 0.282942 | -2.32239 | 221920_s_at | up | 51312 |
| SLC11A1 | 0.540621 | 8.709493 | 2.966672 | 0.00686 | 0.283252 | -2.32955 | 210423_s_at | up | 6556 |
| TENT5A | 0.529355 | 10.2068 | 2.965812 | 0.006873 | 0.283252 | -2.33128 | 221766_s_at | up | 55603 |
| JAG1 | 0.507251 | 6.011325 | 2.947113 | 0.007181 | 0.288819 | -2.36877 | 216268_s_at | up | 182 |
| FCGR2C | 0.547004 | 9.253779 | 2.945865 | 0.007203 | 0.288819 | -2.37127 | 211395_x_at | up | 9103 |
| CPA3 | 0.805135 | 7.649736 | 2.944101 | 0.007232 | 0.288819 | -2.37481 | 205624_at | up | 1359 |
| EPB41L4A | -0.75183 | 5.579615 | -2.94341 | 0.007244 | 0.288819 | -2.37619 | 228256_s_at | down | 64097 |
| CSF2RA | 0.56935 | 6.435616 | 2.926778 | 0.007531 | 0.290004 | -2.40944 | 211287_x_at | up | 1438 |
| TTC16 | -0.63164 | 7.504608 | -2.92615 | 0.007542 | 0.290004 | -2.4107 | 236833_at | down | 158248 |
| TLE1 | -0.84625 | 6.705243 | -2.92094 | 0.007635 | 0.291206 | -2.42109 | 228284_at | down | 7088 |
| GAS1 | -0.63419 | 4.966967 | -2.91367 | 0.007766 | 0.291407 | -2.4356 | 204457_s_at | down | 2619 |
| PTPRO | 0.506263 | 6.362198 | 2.913085 | 0.007776 | 0.291407 | -2.43676 | 208121_s_at | up | 5800 |
| ETS1 | -0.67805 | 9.135348 | -2.91073 | 0.007819 | 0.291613 | -2.44145 | 1555355_a_at | down | 2113 |
| EOMES | -0.6054 | 9.55364 | -2.89779 | 0.008058 | 0.292283 | -2.46721 | 231776_at | down | 8320 |
| RALB | 0.517781 | 7.076234 | 2.890481 | 0.008197 | 0.294844 | -2.48175 | 202101_s_at | up | 5899 |
| GCA | 0.778468 | 10.36043 | 2.880661 | 0.008386 | 0.296621 | -2.50124 | 203765_at | up | 25801 |
| HLX | 0.513807 | 8.31793 | 2.879725 | 0.008405 | 0.296621 | -2.5031 | 214438_at | up | 3142 |
| LYST | 0.511336 | 6.005364 | 2.879222 | 0.008414 | 0.296621 | -2.5041 | 210943_s_at | up | 1130 |
| RGS3 | -0.59692 | 8.362752 | -2.87344 | 0.008528 | 0.29877 | -2.51556 | 239744_at | down | 5998 |
| LOC100505501 | -0.53498 | 6.627842 | -2.87335 | 0.00853 | 0.29877 | -2.51574 | 235171_at | down | 1.01E+08 |
| NCF4 | 0.661153 | 9.510783 | 2.870389 | 0.008589 | 0.299747 | -2.52161 | 207677_s_at | up | 4689 |
| MYBL1 | -0.72821 | 10.34941 | -2.86638 | 0.008669 | 0.300842 | -2.52954 | 213906_at | down | 4603 |
| UBE2B | -0.52026 | 9.731735 | -2.86414 | 0.008714 | 0.301177 | -2.53398 | 228588_s_at | down | 7320 |
| RGS9 | -0.56849 | 5.898212 | -2.85925 | 0.008814 | 0.30308 | -2.54365 | 206518_s_at | down | 8787 |
| SIGLEC10 | 0.500765 | 6.401828 | 2.857475 | 0.00885 | 0.303245 | -2.54717 | 1552806_a_at | up | 89790 |
| KCNJ2 | 1.038306 | 6.66907 | 2.853614 | 0.00893 | 0.3042 | -2.5548 | 206765_at | up | 3759 |
| GZMM | -0.63894 | 8.567099 | -2.85131 | 0.008978 | 0.304645 | -2.55935 | 207460_at | down | 3004 |
| LYRM7 | -0.51445 | 5.419991 | -2.84965 | 0.009012 | 0.305035 | -2.56264 | 239960_x_at | down | 90624 |
| RPL14 | -1.0688 | 8.3836 | -2.84305 | 0.009151 | 0.306575 | -2.57565 | 219138_at | down | 9045 |
| CCNI | -0.55953 | 7.780637 | -2.84073 | 0.009201 | 0.306684 | -2.58024 | 227299_at | down | 10983 |
| BOLA2 | -0.5532 | 5.913209 | -2.83945 | 0.009228 | 0.306703 | -2.58276 | 231500_s_at | down | 552900 |
| RUBCNL | 0.859505 | 8.29223 | 2.831732 | 0.009394 | 0.307739 | -2.59797 | 44790_s_at | up | 80183 |
| CEACAM1 | 1.265562 | 6.245732 | 2.825738 | 0.009525 | 0.308088 | -2.60977 | 209498_at | up | 634 |
| ENO1 | 0.908029 | 9.174397 | 2.825052 | 0.00954 | 0.308088 | -2.61112 | 217294_s_at | up | 2023 |
| CYP4F3 | 1.841311 | 6.227429 | 2.824088 | 0.009561 | 0.308239 | -2.61302 | 206515_at | up | 4051 |
| KRT23 | 1.587304 | 5.405731 | 2.818013 | 0.009697 | 0.309177 | -2.62496 | 218963_s_at | up | 25984 |
| SCD5 | -0.78953 | 5.655731 | -2.81758 | 0.009706 | 0.309177 | -2.62581 | 224901_at | down | 79966 |
| TLE4 | 0.561998 | 7.613363 | 2.81204 | 0.009831 | 0.310644 | -2.6367 | 216997_x_at | up | 7091 |
| ABCA1 | 0.583725 | 5.426777 | 2.809798 | 0.009882 | 0.310827 | -2.6411 | 203504_s_at | up | 19 |
| HEG1 | -0.50799 | 8.30385 | -2.80836 | 0.009915 | 0.310827 | -2.64391 | 213069_at | down | 57493 |
| RAB27B | -0.63217 | 8.513719 | -2.80758 | 0.009933 | 0.310827 | -2.64546 | 228708_at | down | 5874 |
| CRYZ | -0.57581 | 8.567901 | -2.80237 | 0.010053 | 0.312166 | -2.65567 | 202950_at | down | 1429 |
| PER1 | -0.6765 | 7.356477 | -2.79655 | 0.010188 | 0.312589 | -2.66707 | 244677_at | down | 5187 |
| CALHM6 | -0.55188 | 7.743159 | -2.78507 | 0.010461 | 0.31358 | -2.68954 | 229543_at | down | 441168 |
| SYTL2 | -0.77699 | 8.016795 | -2.77615 | 0.010678 | 0.317026 | -2.70697 | 225496_s_at | down | 54843 |
| AREG | -1.61377 | 6.408612 | -2.77259 | 0.010766 | 0.318036 | -2.71392 | 205239_at | down | 374 |
| ACSL1 | 0.629362 | 9.79125 | 2.772538 | 0.010767 | 0.318036 | -2.71402 | 201963_at | up | 2180 |
| SULF2 | 0.56537 | 8.458837 | 2.762012 | 0.01103 | 0.320463 | -2.73454 | 233555_s_at | up | 55959 |
| CEBPD | -0.56391 | 7.509235 | -2.75881 | 0.011111 | 0.320589 | -2.74077 | 213006_at | down | 1052 |
| BASP1 | 0.783248 | 10.33642 | 2.757182 | 0.011153 | 0.320774 | -2.74395 | 202391_at | up | 10409 |
| PYGL | 0.615741 | 9.535025 | 2.752651 | 0.011269 | 0.321351 | -2.75276 | 202990_at | up | 5836 |
| ASCL2 | -0.58211 | 7.886369 | -2.74991 | 0.01134 | 0.322431 | -2.75809 | 229215_at | down | 430 |
| DHRS9 | 0.891938 | 7.03817 | 2.737285 | 0.011673 | 0.324399 | -2.78261 | 223952_x_at | up | 10170 |
| OSCAR | 0.52825 | 8.229043 | 2.729541 | 0.011881 | 0.326104 | -2.79762 | 1554503_a_at | up | 126014 |
| HDC | 0.59078 | 7.956287 | 2.722938 | 0.012062 | 0.326495 | -2.81041 | 207067_s_at | up | 3067 |
| ZNF831 | -0.65233 | 8.10207 | -2.7118 | 0.012372 | 0.326495 | -2.83195 | 1558827_a_at | down | 128611 |
| MAF | -0.55002 | 8.841956 | -2.71034 | 0.012413 | 0.326495 | -2.83476 | 206363_at | down | 4094 |
| IGSF6 | 0.53641 | 7.373506 | 2.709588 | 0.012434 | 0.326495 | -2.83621 | 241068_at | up | 10261 |
| LAIR2 | -0.82235 | 9.256874 | -2.69258 | 0.012925 | 0.327905 | -2.86899 | 207509_s_at | down | 3904 |
| ARAP3 | 0.557601 | 7.991609 | 2.691983 | 0.012943 | 0.328065 | -2.87015 | 218950_at | up | 64411 |
| VCAN | 0.505921 | 10.81087 | 2.687178 | 0.013085 | 0.328467 | -2.87939 | 215646_s_at | up | 1462 |
| MME | 1.334347 | 5.92127 | 2.679249 | 0.013322 | 0.330401 | -2.89463 | 203435_s_at | up | 4311 |
| CD24 | 1.244194 | 7.45215 | 2.678779 | 0.013337 | 0.330401 | -2.89553 | 266_s_at | up | 1E+08 |
| IFIT2 | 0.748336 | 5.614985 | 2.676345 | 0.01341 | 0.330918 | -2.9002 | 217502_at | up | 3433 |
| LILRA2 | 0.531145 | 9.275788 | 2.657588 | 0.013992 | 0.334672 | -2.93614 | 211100_x_at | up | 11027 |
| STX3 | 0.567141 | 7.540595 | 2.655655 | 0.014054 | 0.334768 | -2.93984 | 235483_at | up | 6809 |
| MALAT1 | -0.76305 | 6.883047 | -2.65209 | 0.014167 | 0.335462 | -2.94666 | 228582_x_at | down | 378938 |
| LINC00537 | 0.647511 | 7.755668 | 2.651107 | 0.014199 | 0.335462 | -2.94853 | 232034_at | up | 203274 |
| S100P | 1.610712 | 8.671542 | 2.649184 | 0.014261 | 0.335504 | -2.95221 | 204351_at | up | 6286 |
| ACTN1 | 0.516178 | 9.569193 | 2.639391 | 0.01458 | 0.33763 | -2.97089 | 208637_x_at | up | 87 |
| FRAT2 | 0.638064 | 9.760439 | 2.635952 | 0.014693 | 0.338825 | -2.97745 | 209864_at | up | 23401 |
| SINHCAF | -0.518 | 6.867046 | -2.63508 | 0.014722 | 0.338848 | -2.97911 | 223038_s_at | down | 58516 |
| UBE2D3 | 0.521661 | 9.444207 | 2.631286 | 0.014849 | 0.339971 | -2.98633 | 240383_at | up | 7323 |
| PTGDS | -0.88149 | 9.752765 | -2.63067 | 0.014869 | 0.340278 | -2.98751 | 212187_x_at | down | 5730 |
| LAG3 | -0.60278 | 6.747542 | -2.62004 | 0.015229 | 0.344106 | -3.00771 | 206486_at | down | 3902 |
| DAB2 | -0.50529 | 7.504313 | -2.61982 | 0.015237 | 0.344106 | -3.00812 | 201278_at | down | 1601 |
| BTNL8 | 0.702731 | 4.276267 | 2.616655 | 0.015346 | 0.344435 | -3.01414 | 220421_at | up | 79908 |
| NPL | 0.72709 | 6.942036 | 2.608994 | 0.015613 | 0.347157 | -3.02867 | 240440_at | up | 80896 |
| PIK3R1 | -0.65852 | 9.23155 | -2.59962 | 0.015945 | 0.349149 | -3.04642 | 212240_s_at | down | 5295 |
| LPCAT2 | 0.502334 | 5.491186 | 2.598638 | 0.01598 | 0.349199 | -3.04828 | 222833_at | up | 54947 |
| MAP3K8 | -0.50246 | 8.401998 | -2.59765 | 0.016015 | 0.349507 | -3.05015 | 235421_at | down | 1326 |
| TNFRSF10C | 0.869952 | 6.425075 | 2.592001 | 0.01622 | 0.350569 | -3.06083 | 234644_x_at | up | 8794 |
| ZFY | 1.217496 | 4.456478 | 2.58689 | 0.016406 | 0.351747 | -3.07048 | 230760_at | up | 7544 |
| KIF21A | -0.66034 | 7.39879 | -2.58461 | 0.01649 | 0.351747 | -3.07479 | 226003_at | down | 55605 |
| ADM | 0.962039 | 7.502865 | 2.575781 | 0.016819 | 0.35315 | -3.09142 | 202912_at | up | 133 |
| THBS1 | 1.057498 | 6.408249 | 2.567513 | 0.017133 | 0.355751 | -3.10698 | 201110_s_at | up | 7057 |
| COX5B | -0.59027 | 7.935445 | -2.55344 | 0.017679 | 0.358807 | -3.13339 | 213736_at | down | 1329 |
| GPRC5D | 0.504091 | 5.529991 | 2.539375 | 0.018242 | 0.362628 | -3.15973 | 221297_at | up | 55507 |
| CLEC2D | -0.62337 | 5.656472 | -2.53755 | 0.018316 | 0.362628 | -3.16313 | 228426_at | down | 29121 |
| ARID5B | -0.55117 | 9.278046 | -2.53646 | 0.018361 | 0.362803 | -3.16518 | 212614_at | down | 84159 |
| BAZ2B-AS1 | 0.609757 | 5.239145 | 2.532838 | 0.018509 | 0.363154 | -3.17194 | 228412_at | up | 643072 |
| TNFAIP6 | 1.502474 | 5.750585 | 2.525519 | 0.018812 | 0.364741 | -3.1856 | 206026_s_at | up | 7130 |
| NAMPT | 1.123906 | 6.253743 | 2.524431 | 0.018858 | 0.364939 | -3.18762 | 1555167_s_at | up | 10135 |
| ALAS1 | 0.512748 | 8.490168 | 2.516374 | 0.019198 | 0.367154 | -3.20263 | 205633_s_at | up | 211 |
| SLC25A39 | 0.518139 | 8.331205 | 2.512688 | 0.019355 | 0.367961 | -3.20948 | 223649_s_at | up | 51629 |
| ST20 | 0.668008 | 5.577411 | 2.501369 | 0.019846 | 0.369267 | -3.2305 | 217104_at | up | 400410 |
| SPIDR | -0.52025 | 8.031568 | -2.49457 | 0.020147 | 0.369455 | -3.24309 | 228325_at | down | 23514 |
| PGLYRP1 | 1.095171 | 6.815575 | 2.494269 | 0.02016 | 0.369492 | -3.24365 | 207384_at | up | 8993 |
| LRG1 | 0.828058 | 6.725803 | 2.487384 | 0.020469 | 0.370332 | -3.25639 | 228648_at | up | 116844 |
| GPR27 | 0.847525 | 7.318611 | 2.48671 | 0.0205 | 0.370394 | -3.25764 | 227769_at | up | 2850 |
| ADGRG3 | 0.717184 | 6.74082 | 2.480095 | 0.020801 | 0.37218 | -3.26986 | 220404_at | up | 222487 |
| MMP25 | 0.865212 | 7.67025 | 2.45417 | 0.022021 | 0.377846 | -3.31758 | 207890_s_at | up | 64386 |
| TRPM6 | 0.997296 | 4.717777 | 2.450204 | 0.022214 | 0.378068 | -3.32486 | 224412_s_at | up | 140803 |
| NAP1L5 | -0.74429 | 5.729957 | -2.44857 | 0.022293 | 0.378891 | -3.32785 | 228062_at | down | 266812 |
| JAKMIP1 | -0.51998 | 6.809181 | -2.44463 | 0.022487 | 0.379974 | -3.33507 | 238600_at | down | 152789 |
| TLR4 | 0.51783 | 7.023189 | 2.442542 | 0.02259 | 0.380501 | -3.33889 | 221060_s_at | up | 7099 |
| TNFAIP3 | -0.97067 | 11.85335 | -2.44046 | 0.022693 | 0.380908 | -3.3427 | 202644_s_at | down | 7128 |
| DENND3 | 0.504104 | 5.704059 | 2.439862 | 0.022723 | 0.38098 | -3.3438 | 212974_at | up | 22898 |
| TRG-AS1 | -0.55185 | 9.019001 | -2.43513 | 0.02296 | 0.381955 | -3.35246 | 239237_at | down | 1.01E+08 |
| CD96 | -0.58233 | 9.23739 | -2.43172 | 0.023131 | 0.382894 | -3.35868 | 206761_at | down | 10225 |
| FBXO32 | -0.6581 | 7.566382 | -2.43083 | 0.023177 | 0.382894 | -3.36032 | 225328_at | down | 114907 |
| QPCT | 0.523528 | 9.839381 | 2.430419 | 0.023197 | 0.382894 | -3.36106 | 205174_s_at | up | 25797 |
| MTPAP | -0.58681 | 7.596381 | -2.42472 | 0.023488 | 0.384579 | -3.37146 | 229676_at | down | 55149 |
| DYSF | 0.609593 | 8.779289 | 2.422654 | 0.023594 | 0.38508 | -3.37522 | 218660_at | up | 8291 |
| BCL6 | 0.586761 | 6.63123 | 2.417527 | 0.02386 | 0.38666 | -3.38456 | 215990_s_at | up | 604 |
| SNHG32 | -0.75873 | 7.38802 | -2.41417 | 0.024035 | 0.387838 | -3.39066 | 222968_at | down | 50854 |
| COL13A1 | -0.74188 | 4.69859 | -2.4131 | 0.024091 | 0.387838 | -3.39261 | 211343_s_at | down | 1305 |
| ZNF578 | -0.57699 | 5.203948 | -2.41028 | 0.02424 | 0.388312 | -3.39774 | 1562244_at | down | 147660 |
| SLC30A4 | -0.52334 | 6.98094 | -2.40905 | 0.024305 | 0.388505 | -3.39997 | 227193_at | down | 7782 |
| GPR171 | -0.56357 | 9.445168 | -2.40766 | 0.024378 | 0.388505 | -3.4025 | 207651_at | down | 29909 |
| MIAT | -0.50743 | 6.665406 | -2.40248 | 0.024655 | 0.389736 | -3.4119 | 237322_at | down | 440823 |
| SLPI | 1.344929 | 6.507303 | 2.401273 | 0.02472 | 0.389736 | -3.41409 | 203021_at | up | 6590 |
| SIRPB2 | 0.593334 | 7.233029 | 2.39933 | 0.024825 | 0.390024 | -3.41761 | 1559034_at | up | 284759 |
| MS4A2 | 0.697629 | 5.698997 | 2.397606 | 0.024918 | 0.390479 | -3.42074 | 207496_at | up | 2206 |
| ATM | -0.61011 | 10.40982 | -2.39225 | 0.02521 | 0.392467 | -3.43044 | 210858_x_at | down | 472 |
| EIF1AX | -0.51848 | 9.012145 | -2.3864 | 0.025532 | 0.393644 | -3.44102 | 201018_at | down | 1964 |
| CEACAM8 | 1.832535 | 7.276284 | 2.385223 | 0.025597 | 0.393644 | -3.44314 | 206676_at | up | 1088 |
| GBP5 | -0.5461 | 9.314076 | -2.38234 | 0.025758 | 0.394557 | -3.44835 | 238581_at | down | 115362 |
| ARL11 | 0.532566 | 6.163174 | 2.382175 | 0.025767 | 0.394557 | -3.44864 | 1552691_at | up | 115761 |
| RPS19 | -1.10938 | 8.808188 | -2.37975 | 0.025903 | 0.395044 | -3.45302 | 202648_at | down | 6223 |
| JAK2 | 0.684146 | 6.655082 | 2.37332 | 0.026266 | 0.396823 | -3.46461 | 1562031_at | up | 3717 |
| PPIF | 0.639661 | 6.863742 | 2.356417 | 0.027244 | 0.399545 | -3.49499 | 201490_s_at | up | 10105 |
| PSMB4 | -0.88023 | 9.36969 | -2.35515 | 0.027318 | 0.400008 | -3.49726 | 228204_at | down | 5692 |
| RGCC | -0.75035 | 4.646438 | -2.35032 | 0.027605 | 0.401088 | -3.50593 | 239827_at | down | 28984 |
| IL13RA1 | 0.594695 | 6.212359 | 2.341567 | 0.02813 | 0.403363 | -3.52159 | 210904_s_at | up | 3597 |
| SVIL | 0.54449 | 5.395343 | 2.337144 | 0.028399 | 0.404664 | -3.52949 | 1569512_at | up | 6840 |
| HAL | 0.504507 | 6.874205 | 2.325223 | 0.029136 | 0.406448 | -3.55074 | 217521_at | up | 3034 |
| RNASE3 | 1.329336 | 7.240786 | 2.319959 | 0.029468 | 0.407529 | -3.5601 | 206851_at | up | 6037 |
| CEACAM3 | 0.689595 | 6.739854 | 2.319273 | 0.029511 | 0.407529 | -3.56132 | 210789_x_at | up | 1084 |
| LTF | 1.389846 | 9.89526 | 2.317468 | 0.029625 | 0.407529 | -3.56453 | 202018_s_at | up | 4057 |
| DGAT2 | 0.677157 | 6.598546 | 2.317326 | 0.029634 | 0.407529 | -3.56478 | 226064_s_at | up | 84649 |
| MSRB1 | 0.577953 | 11.11493 | 2.316322 | 0.029698 | 0.407529 | -3.56657 | 217977_at | up | 51734 |
| MIX23 | -0.57804 | 7.28857 | -2.31466 | 0.029804 | 0.407529 | -3.56952 | 235244_at | down | 131076 |
| PCNX2 | -0.50365 | 8.611296 | -2.31365 | 0.029869 | 0.407595 | -3.57132 | 229202_at | down | 80003 |
| CRISP3 | 1.067349 | 4.95485 | 2.313226 | 0.029896 | 0.407595 | -3.57206 | 207802_at | up | 10321 |
| NRG1 | 0.664364 | 6.346543 | 2.30719 | 0.030285 | 0.409552 | -3.58277 | 206237_s_at | up | 3084 |
| PPP1R2C | -0.50802 | 4.940506 | -2.30386 | 0.030501 | 0.40988 | -3.58866 | 207377_at | down | 80316 |
| PASK | -0.60682 | 8.615207 | -2.30109 | 0.030683 | 0.409984 | -3.59357 | 216945_x_at | down | 23178 |
| MMP9 | 1.160685 | 7.824669 | 2.298892 | 0.030827 | 0.410259 | -3.59745 | 203936_s_at | up | 4318 |
| EGR1 | 0.864923 | 8.139774 | 2.295285 | 0.031066 | 0.410962 | -3.60383 | 201693_s_at | up | 1958 |
| TKTL1 | -0.55241 | 7.459112 | -2.27808 | 0.032226 | 0.415567 | -3.63415 | 214183_s_at | down | 8277 |
| NSG1 | -0.55061 | 6.79584 | -2.27572 | 0.032389 | 0.416079 | -3.63831 | 209569_x_at | down | 27065 |
| ANXA3 | 1.451035 | 7.095654 | 2.269093 | 0.032848 | 0.418349 | -3.64994 | 209369_at | up | 306 |
| CBWD2 | 0.52541 | 7.522125 | 2.26511 | 0.033127 | 0.418935 | -3.65692 | 229804_x_at | up | 150472 |
| NRF1 | 0.575242 | 5.836826 | 2.26412 | 0.033197 | 0.419151 | -3.65866 | 243189_at | up | 4899 |
| RETN | 1.053738 | 9.046851 | 2.259323 | 0.033537 | 0.420398 | -3.66706 | 220570_at | up | 56729 |
| PYHIN1 | -0.5483 | 9.456993 | -2.24352 | 0.034678 | 0.425057 | -3.69465 | 240413_at | down | 149628 |
| IGKV1-17 | 1.156755 | 9.515493 | 2.242079 | 0.034784 | 0.425156 | -3.69716 | 211645_x_at | up | 28937 |
| NFE2 | 0.608078 | 8.913912 | 2.239024 | 0.035009 | 0.425474 | -3.70248 | 209930_s_at | up | 4778 |
| MANSC1 | 0.913921 | 5.47731 | 2.231739 | 0.035552 | 0.427398 | -3.71514 | 220945_x_at | up | 54682 |
| CAMP | 1.145696 | 9.250446 | 2.227976 | 0.035835 | 0.427792 | -3.72167 | 210244_at | up | 820 |
| PRKY | 0.952515 | 6.460929 | 2.209866 | 0.037228 | 0.432885 | -3.75302 | 206279_at | up | 5616 |
| SAMHD1 | -0.66635 | 8.397553 | -2.20739 | 0.037422 | 0.434129 | -3.75729 | 1559882_at | down | 25939 |
| CA4 | 0.615866 | 4.684344 | 2.201977 | 0.037849 | 0.435327 | -3.76662 | 206209_s_at | up | 762 |
| XIST | -2.87103 | 8.410119 | -2.1973 | 0.038223 | 0.435654 | -3.77468 | 227671_at | down | 7503 |
| FLVCR1 | 0.547311 | 7.120557 | 2.181814 | 0.039481 | 0.437347 | -3.80125 | 222906_at | up | 28982 |
| EIF1AY | 1.595657 | 5.184283 | 2.17464 | 0.040077 | 0.43867 | -3.81352 | 204410_at | up | 9086 |
| UTY | 0.705475 | 5.170096 | 2.17138 | 0.040351 | 0.440195 | -3.81909 | 208067_x_at | up | 7404 |
| SAP30L | -0.5152 | 6.956431 | -2.16023 | 0.041298 | 0.443987 | -3.83809 | 222831_at | down | 79685 |
| CDC42 | -0.66533 | 10.33509 | -2.15088 | 0.042109 | 0.446399 | -3.85399 | 208727_s_at | down | 998 |
| LCN2 | 1.265292 | 8.738356 | 2.147877 | 0.042372 | 0.44724 | -3.85908 | 212531_at | up | 3934 |
| ATG16L1 | -0.58135 | 5.952481 | -2.14653 | 0.042491 | 0.447541 | -3.86136 | 220521_s_at | down | 55054 |
| PROK2 | 1.021552 | 7.672605 | 2.144539 | 0.042667 | 0.447841 | -3.86474 | 232629_at | up | 60675 |
| TM6SF1 | 0.532189 | 7.585852 | 2.144074 | 0.042708 | 0.447886 | -3.86552 | 219892_at | up | 53346 |
| IGLV@ | 1.00502 | 9.792962 | 2.136229 | 0.043408 | 0.450067 | -3.87879 | 217235_x_at | up | 3546 |
| CXCR1 | 0.788202 | 7.113556 | 2.133069 | 0.043693 | 0.451033 | -3.88413 | 207094_at | up | 3577 |
| BPI | 1.177048 | 8.006459 | 2.131404 | 0.043843 | 0.45151 | -3.88694 | 205557_at | up | 671 |
| HBD | 1.45914 | 7.785142 | 2.128271 | 0.044128 | 0.451563 | -3.89223 | 206834_at | up | 3045 |
| HBD | 1.45914 | 7.785142 | 2.128271 | 0.044128 | 0.451563 | -3.89223 | 206834_at | up | 1E+08 |
| SELENBP1 | 0.946156 | 5.214175 | 2.123166 | 0.044596 | 0.452539 | -3.90082 | 214433_s_at | up | 8991 |
| JCHAIN | 1.08212 | 12.25304 | 2.120629 | 0.04483 | 0.45327 | -3.90509 | 212592_at | up | 3512 |
| SEC14L1 | 0.503162 | 8.468689 | 2.120215 | 0.044868 | 0.45327 | -3.90579 | 202083_s_at | up | 6397 |
| A2M-AS1 | -0.76737 | 7.079508 | -2.119 | 0.044981 | 0.45327 | -3.90784 | 1564139_at | down | 144571 |
| IFIT3 | 0.967899 | 8.352455 | 2.118129 | 0.045062 | 0.45327 | -3.90929 | 204747_at | up | 3437 |
| DDX3Y | 2.818991 | 6.628005 | 2.11725 | 0.045144 | 0.45327 | -3.91077 | 205000_at | up | 8653 |
| CTLA4 | -0.68849 | 7.883252 | -2.11519 | 0.045336 | 0.45327 | -3.91423 | 236341_at | down | 1493 |
| IGKC | 0.980467 | 9.353116 | 2.112877 | 0.045552 | 0.453378 | -3.91811 | 211643_x_at | up | 3514 |
| ARG1 | 1.348389 | 6.250246 | 2.100477 | 0.046729 | 0.457761 | -3.93888 | 206177_s_at | up | 383 |
| BIK | 0.596334 | 7.257733 | 2.090612 | 0.047685 | 0.460517 | -3.95534 | 205780_at | up | 638 |
| TXLNGY | 1.971194 | 5.984378 | 2.081541 | 0.048579 | 0.463177 | -3.97043 | 223646_s_at | up | 246126 |
| PADI4 | 0.62579 | 9.392757 | 2.081522 | 0.048581 | 0.463177 | -3.97046 | 220001_at | up | 23569 |
| CXCL1 | 0.869666 | 6.354103 | 2.075993 | 0.049134 | 0.464933 | -3.97964 | 204470_at | up | 2919 |
| P2RY13 | 0.562664 | 8.957671 | 2.072561 | 0.049479 | 0.465904 | -3.98533 | 220005_at | up | 53829 |
