# Supplementary material for: Identification of crucial extracellular genes as potential biomarkers in newly diagnosed Type 1 diabetes via integrated bioinformatics analysis
Source: PeerJ journal article supplement (doi:10.7717/peerj.18660), 2025-01-09
Supplement: Table_S3_ego_CC.xlsx [file Table_S3_ego_CC.xlsx]

## Sheet: 427447Table S3 ego_CC
ID	Description	GeneRatio	BgRatio	pvalue	p.adjust	qvalue	geneID	Count
GO:0042581	specific granule	19/122	160/19550	2.97e-19	8.58e-17	6.5e-17	CHI3L1/CEACAM1/OSCAR/STX3/PGLYRP1/LRG1/QPCT/SLPI/CEACAM8/LTF/CRISP3/ANXA3/RETN/CAMP/LCN2/BPI/ARG1/CXCL1/MMP25	19
GO:0035580	specific granule lumen	14/122	62/19550	1.43e-18	2.06e-16	1.56e-16	CHI3L1/OSCAR/PGLYRP1/LRG1/QPCT/SLPI/LTF/CRISP3/RETN/CAMP/LCN2/BPI/ARG1/CXCL1	14
GO:0034774	secretory granule lumen	23/122	322/19550	4.13e-18	3.36e-16	2.55e-16	ALOX5/HSPA6/CHI3L1/GCA/PYGL/OSCAR/S100P/ACTN1/THBS1/PGLYRP1/LRG1/QPCT/SLPI/RNASE3/LTF/CRISP3/RETN/CAMP/LCN2/BPI/ARG1/CXCL1/CTSW	23
GO:0060205	cytoplasmic vesicle lumen	23/122	325/19550	5.08e-18	3.36e-16	2.55e-16	ALOX5/HSPA6/CHI3L1/GCA/PYGL/OSCAR/S100P/ACTN1/THBS1/PGLYRP1/LRG1/QPCT/SLPI/RNASE3/LTF/CRISP3/RETN/CAMP/LCN2/BPI/ARG1/CXCL1/CTSW	23
GO:0031983	vesicle lumen	23/122	327/19550	5.82e-18	3.36e-16	2.55e-16	ALOX5/HSPA6/CHI3L1/GCA/PYGL/OSCAR/S100P/ACTN1/THBS1/PGLYRP1/LRG1/QPCT/SLPI/RNASE3/LTF/CRISP3/RETN/CAMP/LCN2/BPI/ARG1/CXCL1/CTSW	23
GO:1904724	tertiary granule lumen	10/122	55/19550	1.42e-12	6.84e-11	5.19e-11	OSCAR/TNFAIP6/PGLYRP1/LRG1/QPCT/LTF/CRISP3/MMP9/CAMP/CXCL1	10
GO:0070820	tertiary granule	14/122	164/19550	1.91e-12	7.87e-11	5.96e-11	CEACAM1/OSCAR/TNFAIP6/PGLYRP1/LRG1/QPCT/CEACAM8/LTF/CRISP3/MMP9/CAMP/CXCL1/ADGRE3/ENPP4	14
GO:0097013	phagocytic vesicle lumen	3/122	5/19550	2.35e-06	7.83e-05	5.93e-05	PGLYRP1/LTF/GNLY	3
GO:0101002	ficolin-1-rich granule	9/122	185/19550	2.44e-06	7.83e-05	5.93e-05	ALOX5/HSPA6/PYGL/TNFAIP6/LRG1/QPCT/MMP9/ADGRE3/ENPP4	9
GO:1904813	ficolin-1-rich granule lumen	7/122	124/19550	1.28e-05	0.000368721	0.000279344	ALOX5/HSPA6/PYGL/TNFAIP6/LRG1/QPCT/MMP9	7
GO:0030667	secretory granule membrane	10/122	311/19550	2.57e-05	0.000675497	0.000511759	CEACAM1/MME/STX3/CEACAM8/CA4/ADGRE3/MMP25/ENPP4/PAM/RAB27B	10
GO:0005766	primary lysosome	7/122	155/19550	5.37e-05	0.00119456	0.000905004	GCA/STX3/CEACAM8/RNASE3/RETN/BPI/ARG1	7
GO:0042582	azurophil granule	7/122	155/19550	5.37e-05	0.00119456	0.000905004	GCA/STX3/CEACAM8/RNASE3/RETN/BPI/ARG1	7
GO:0009897	external side of plasma membrane	11/122	421/19550	6.68e-05	0.00137907	0.00104479	IGHE/THBS1/CA4/IGKC/CSF2RA/TGFBR3/ABCB1/TNF/TRDC/FOLR1/NCAM1	11
GO:0031225	anchored component of membrane	7/122	170/19550	9.62e-05	0.00185275	0.00140365	CEACAM8/CA4/MMP25/FOLR1/RAB27B/CD160/NCAM1	7
GO:0035578	azurophil granule lumen	5/122	91/19550	0.000264111	0.0047705	0.00361415	GCA/RNASE3/RETN/BPI/ARG1	5
GO:0071682	endocytic vesicle lumen	3/122	23/19550	0.000383286	0.00651586	0.00493644	PGLYRP1/LTF/GNLY	3
GO:0019814	immunoglobulin complex	6/122	167/19550	0.000634235	0.010183	0.00771467	IGHE/IGKV1D-8/IGKV1-17/JCHAIN/IGKC/TRDC	6
GO:0005788	endoplasmic reticulum lumen	8/122	313/19550	0.00078405	0.0109364	0.00828547	COL6A3/COL18A1/VCAN/THBS1/PRSS23/PDGFD/IGFBP3/COL13A1	8
GO:0005775	vacuolar lumen	6/122	174/19550	0.000786194	0.0109364	0.00828547	GCA/VCAN/RNASE3/RETN/BPI/ARG1	6
GO:0044194	cytolytic granule	2/122	7/19550	0.000794688	0.0109364	0.00828547	GNLY/GZMB	2
GO:0030133	transport vesicle	9/122	412/19550	0.00112688	0.0148031	0.0112149	CPA3/CEACAM1/MME/STX3/CA4/PAM/FOLR1/RAB27B/AREG	9
GO:0042571	immunoglobulin complex, circulating	4/122	77/19550	0.00137479	0.016824	0.0127459	IGHE/JCHAIN/IGKC/TRDC	4
GO:0062023	collagen-containing extracellular matrix	9/122	425/19550	0.00139715	0.016824	0.0127459	COL6A3/COL18A1/CPA3/VCAN/THBS1/SLPI/MMP9/COL13A1/NCAM1	9
GO:0045177	apical part of cell	9/122	435/19550	0.00163878	0.0187873	0.0142333	PTPRO/CEACAM1/STX3/CA4/SEPTIN7/ABCB1/FOLR1/RAB27B/CDC42	9
GO:0045335	phagocytic vesicle	5/122	137/19550	0.00169021	0.0187873	0.0142333	PGLYRP1/LTF/ANXA3/GNLY/CDC42	5
GO:0042589	zymogen granule membrane	2/122	11/19550	0.00204757	0.0215072	0.0162939	STX3/RAB27B	2
GO:0016324	apical plasma membrane	8/122	367/19550	0.0021502	0.0215072	0.0162939	PTPRO/CEACAM1/STX3/CA4/SEPTIN7/ABCB1/FOLR1/RAB27B	8
GO:0030658	transport vesicle membrane	6/122	212/19550	0.00215816	0.0215072	0.0162939	CEACAM1/CA4/PAM/FOLR1/RAB27B/AREG	6
GO:0072562	blood microparticle	5/122	146/19550	0.00223279	0.0215092	0.0162955	HSPA6/IGKV1-17/HBD/JCHAIN/IGKC	5
GO:0042588	zymogen granule	2/122	15/19550	0.00384571	0.035852	0.0271616	STX3/RAB27B	2
GO:0005903	brush border	4/122	106/19550	0.00439479	0.0396905	0.0300696	MME/ACTN1/CA4/FOLR1	4
GO:0005925	focal adhesion	8/122	418/19550	0.0047316	0.0414374	0.0313931	MARCKS/ITGB8/MME/ACTN1/RRAS2/SYNE2/RPS19/CDC42	8
GO:0030139	endocytic vesicle	7/122	336/19550	0.00517151	0.0430972	0.0326506	PGLYRP1/DYSF/LTF/ANXA3/GNLY/AREG/CDC42	7
GO:0030055	cell-substrate junction	8/122	425/19550	0.00521939	0.0430972	0.0326506	MARCKS/ITGB8/MME/ACTN1/RRAS2/SYNE2/RPS19/CDC42	8
GO:0005600	collagen type XIII trimer	1/122	1/19550	0.00624041	0.0487427	0.0369276	COL13A1	1
GO:0030936	transmembrane collagen trimer	1/122	1/19550	0.00624041	0.0487427	0.0369276	COL13A1	1
