# Supplementary material for: Identification of crucial extracellular genes as potential biomarkers in newly diagnosed Type 1 diabetes via integrated bioinformatics analysis
Source: PeerJ journal article supplement (doi:10.7717/peerj.18660), 2025-01-09
Supplement: Table_S3_ego_MF.xlsx [file Table_S3_ego_MF.xlsx]

## Sheet: 427447Table S3 ego_BP
	ID	Description	GeneRatio	BgRatio	pvalue	p.adjust	qvalue	geneID	Count
GO:0042742	GO:0042742	defense response to bacterium	18/119	350/18723	8.36779e-12	2.58816e-08	1.67708e-08	IGHE/PGLYRP1/SLPI/RNASE3/LTF/ANXA3/CAMP/LCN2/BPI/JCHAIN/IGKC/GNLY/TLR3/SPON2/TNF/TRDC/RPS19/CD160	18
GO:0006959	GO:0006959	humoral immune response	16/119	317/18723	1.74594e-10	2.70009e-07	1.74961e-07	ALOX5/IGHE/PGLYRP1/SLPI/RNASE3/LTF/CAMP/JCHAIN/IGKC/CXCL1/GNLY/SPON2/TNF/TRDC/IFNG/RPS19	16
GO:0002274	GO:0002274	myeloid leukocyte activation	13/119	223/18723	1.75621e-09	1.81065e-06	1.17327e-06	ITGB8/THBS1/NAMPT/DYSF/ANXA3/BPI/LILRA2/TLR3/CST7/CCL5/TNF/IFNG/PTGDS	13
GO:0001906	GO:0001906	cell killing	12/119	188/18723	2.74988e-09	2.12634e-06	1.37783e-06	CEACAM1/PGLYRP1/LTF/CAMP/ARG1/GNLY/XCL1/IFNG/RPS19/CD160/GZMB/GZMM	12
GO:0019730	GO:0019730	antimicrobial humoral response	10/119	122/18723	5.55901e-09	3.4388e-06	2.22829e-06	PGLYRP1/SLPI/RNASE3/LTF/CAMP/JCHAIN/CXCL1/GNLY/SPON2/RPS19	10
GO:0071222	GO:0071222	cellular response to lipopolysaccharide	12/119	209/18723	9.09294e-09	4.68741e-06	3.03736e-06	CD180/LTF/CAMP/LCN2/BPI/ARG1/CXCL1/LILRA2/SPON2/CCL5/TNF/TNFAIP3	12
GO:0071219	GO:0071219	cellular response to molecule of bacterial origin	12/119	221/18723	1.69711e-08	7.49882e-06	4.85911e-06	CD180/LTF/CAMP/LCN2/BPI/ARG1/CXCL1/LILRA2/SPON2/CCL5/TNF/TNFAIP3	12
GO:0032496	GO:0032496	response to lipopolysaccharide	14/119	343/18723	3.8421e-08	1.48545e-05	9.62548e-06	CD180/ADM/SLPI/LTF/CAMP/LCN2/BPI/ARG1/CXCL1/LILRA2/SPON2/CCL5/TNF/TNFAIP3	14
GO:0071216	GO:0071216	cellular response to biotic stimulus	12/119	246/18723	5.54881e-08	1.90694e-05	1.23567e-05	CD180/LTF/CAMP/LCN2/BPI/ARG1/CXCL1/LILRA2/SPON2/CCL5/TNF/TNFAIP3	12
GO:0002237	GO:0002237	response to molecule of bacterial origin	14/119	363/18723	7.75668e-08	2.39914e-05	1.5546e-05	CD180/ADM/SLPI/LTF/CAMP/LCN2/BPI/ARG1/CXCL1/LILRA2/SPON2/CCL5/TNF/TNFAIP3	14
GO:0031663	GO:0031663	lipopolysaccharide-mediated signaling pathway	7/119	60/18723	1.02497e-07	2.88203e-05	1.86751e-05	CD180/LTF/BPI/LILRA2/CCL5/TNF/TNFAIP3	7
GO:0031640	GO:0031640	killing of cells of other organism	7/119	68/18723	2.46725e-07	6.35935e-05	4.12075e-05	PGLYRP1/LTF/CAMP/ARG1/GNLY/IFNG/RPS19	7
GO:0045765	GO:0045765	regulation of angiogenesis	13/119	342/18723	2.7507e-07	6.54456e-05	4.24076e-05	ALOX5/CHI3L1/ITGB8/CEACAM1/ADM/THBS1/LRG1/ANXA3/CAMP/TLR3/TNF/TNFAIP3/CD160	13
GO:1901342	GO:1901342	regulation of vasculature development	13/119	348/18723	3.35392e-07	7.40977e-05	4.8014e-05	ALOX5/CHI3L1/ITGB8/CEACAM1/ADM/THBS1/LRG1/ANXA3/CAMP/TLR3/TNF/TNFAIP3/CD160	13
GO:0042116	GO:0042116	macrophage activation	8/119	106/18723	3.76935e-07	7.7724e-05	5.03638e-05	THBS1/NAMPT/DYSF/BPI/TLR3/CST7/TNF/IFNG	8
GO:0032102	GO:0032102	negative regulation of response to external stimulus	14/119	420/18723	4.5756e-07	8.8452e-05	5.73153e-05	ALOX5/PTPRO/CEACAM1/THBS1/TNFAIP6/PGLYRP1/LTF/ARG1/LILRA2/CST7/TNF/TNFAIP3/RPS19/PSMB4	14
GO:0071674	GO:0071674	mononuclear cell migration	10/119	196/18723	4.97106e-07	9.04441e-05	5.86062e-05	ALOX5/PTPRO/THBS1/CCL4/XCL1/PDGFD/CCL5/TNF/RPS19/CDC42	10
GO:0032103	GO:0032103	positive regulation of response to external stimulus	14/119	427/18723	5.57709e-07	9.5833e-05	6.20981e-05	CD180/STX3/THBS1/ARG1/LILRA2/CCL4/XCL1/TLR3/PDGFD/CCL5/TNF/IFNG/RPS19/CD160	14
GO:0002683	GO:0002683	negative regulation of immune system process	14/119	434/18723	6.77143e-07	0.000107705	6.97912e-05	CEACAM1/THBS1/PGLYRP1/LTF/BPI/ARG1/XCL1/TLR3/CST7/TNF/TNFAIP3/RPS19/PSMB4/CD160	14
GO:0061844	GO:0061844	antimicrobial humoral immune response mediated by antimicrobial peptide	7/119	79/18723	6.96446e-07	0.000107705	6.97912e-05	PGLYRP1/RNASE3/LTF/CAMP/CXCL1/GNLY/RPS19	7
GO:0002443	GO:0002443	leukocyte mediated immunity	14/119	440/18723	7.97283e-07	0.000117428	7.60915e-05	IGHE/CEACAM1/ANXA3/IGKC/ARG1/XCL1/TLR3/SPON2/TNF/TRDC/PTGDS/CD160/GZMB/GZMM	14
GO:0050727	GO:0050727	regulation of inflammatory response	13/119	386/18723	1.07854e-06	0.000151632	9.82552e-05	ALOX5/TNFAIP6/PGLYRP1/MMP9/XCL1/TLR3/CST7/CCL5/TNF/IFNG/TNFAIP3/RPS19/PSMB4	13
GO:0019731	GO:0019731	antibacterial humoral response	6/119	60/18723	2.19699e-06	0.000288878	0.000187188	SLPI/RNASE3/LTF/CAMP/JCHAIN/SPON2	6
GO:0048660	GO:0048660	regulation of smooth muscle cell proliferation	9/119	180/18723	2.24153e-06	0.000288878	0.000187188	THBS1/NAMPT/MMP9/PDGFD/CCL5/TNF/IGFBP3/IFNG/TNFAIP3	9
GO:2000503	GO:2000503	positive regulation of natural killer cell chemotaxis	3/119	5/18723	2.48035e-06	0.000306869	0.000198846	CCL4/XCL1/CCL5	3
GO:0048659	GO:0048659	smooth muscle cell proliferation	9/119	184/18723	2.68661e-06	0.000319603	0.000207097	THBS1/NAMPT/MMP9/PDGFD/CCL5/TNF/IGFBP3/IFNG/TNFAIP3	9
GO:0002385	GO:0002385	mucosal immune response	5/119	38/18723	4.04552e-06	0.000444648	0.000288124	RNASE3/LTF/CAMP/XCL1/CD160	5
GO:0050900	GO:0050900	leukocyte migration	12/119	369/18723	4.10475e-06	0.000444648	0.000288124	ALOX5/PTPRO/THBS1/MMP9/CXCL1/CCL4/XCL1/PDGFD/CCL5/TNF/RPS19/CDC42	12
GO:0033002	GO:0033002	muscle cell proliferation	10/119	248/18723	4.16903e-06	0.000444648	0.000288124	THBS1/NAMPT/MMP9/PDGFD/TGFBR3/CCL5/TNF/IGFBP3/IFNG/TNFAIP3	10
GO:0002544	GO:0002544	chronic inflammatory response	4/119	18/18723	4.43106e-06	0.000456842	0.000296026	THBS1/CCL5/TNF/TNFAIP3	4
GO:0030099	GO:0030099	myeloid cell differentiation	12/119	381/18723	5.68663e-06	0.000567379	0.000367652	ITGB8/CEACAM1/OSCAR/ACTN1/LTF/MMP9/TLR3/TGFBR3/TNF/IFNG/RPS19/CDC42	12
GO:0002251	GO:0002251	organ or tissue specific immune response	5/119	41/18723	5.94878e-06	0.000574986	0.000372581	RNASE3/LTF/CAMP/XCL1/CD160	5
GO:0045860	GO:0045860	positive regulation of protein kinase activity	12/119	386/18723	6.49008e-06	0.000608297	0.000394166	CHI3L1/RALB/THBS1/GPRC5D/LTF/NRG1/TLR3/PDGFD/CCL5/TNF/IFNG/AREG	12
GO:0002573	GO:0002573	myeloid leukocyte differentiation	9/119	208/18723	7.30017e-06	0.000664101	0.000430326	ITGB8/CEACAM1/OSCAR/LTF/MMP9/TLR3/TNF/IFNG/CDC42	9
GO:0071347	GO:0071347	cellular response to interleukin-1	7/119	113/18723	7.76692e-06	0.000686374	0.000444758	IL1RN/CHI3L1/CAMP/LCN2/CCL4/XCL1/CCL5	7
GO:0002676	GO:0002676	regulation of chronic inflammatory response	3/119	7/18723	8.60077e-06	0.000722919	0.000468439	CCL5/TNF/TNFAIP3	3
GO:0033674	GO:0033674	positive regulation of kinase activity	13/119	467/18723	8.64791e-06	0.000722919	0.000468439	CHI3L1/RALB/THBS1/GPRC5D/LTF/NRG1/TLR3/PDGFD/CCL5/TNF/IFNG/AREG/CDC42	13
GO:0022612	GO:0022612	gland morphogenesis	7/119	118/18723	1.03295e-05	0.000819207	0.000530832	CEACAM1/SULF2/ARG1/TNF/AREG/TNFAIP3/CDC42	7
GO:0071346	GO:0071346	cellular response to interferon-gamma	7/119	118/18723	1.03295e-05	0.000819207	0.000530832	ARG1/CCL4/XCL1/TLR3/CCL5/IFNG/CDC42	7
GO:0031960	GO:0031960	response to corticosteroid	8/119	167/18723	1.14688e-05	0.000886827	0.000574649	IL1RN/ADM/ANXA3/ARG1/PAM/TNF/AKR1C3/AREG	8
GO:0001774	GO:0001774	microglial cell activation	5/119	47/18723	1.18118e-05	0.000891073	0.0005774	NAMPT/TLR3/CST7/TNF/IFNG	5
GO:2000501	GO:2000501	regulation of natural killer cell chemotaxis	3/119	8/18723	1.36973e-05	0.00100871	0.000653628	CCL4/XCL1/CCL5	3
GO:0071356	GO:0071356	cellular response to tumor necrosis factor	9/119	229/18723	1.57796e-05	0.00113503	0.000735482	CHI3L1/THBS1/CAMP/LCN2/CCL4/XCL1/CCL5/TNF/TNFAIP3	9
GO:0031664	GO:0031664	regulation of lipopolysaccharide-mediated signaling pathway	4/119	25/18723	1.76986e-05	0.00124413	0.000806177	CD180/LTF/LILRA2/TNFAIP3	4
GO:0032640	GO:0032640	tumor necrosis factor production	8/119	181/18723	2.05592e-05	0.00129904	0.000841755	THBS1/LTF/BPI/LILRA2/TLR3/SPON2/IFNG/TNFAIP3	8
GO:0032680	GO:0032680	regulation of tumor necrosis factor production	8/119	181/18723	2.05592e-05	0.00129904	0.000841755	THBS1/LTF/BPI/LILRA2/TLR3/SPON2/IFNG/TNFAIP3	8
GO:0045766	GO:0045766	positive regulation of angiogenesis	8/119	181/18723	2.05592e-05	0.00129904	0.000841755	CHI3L1/ITGB8/ADM/THBS1/LRG1/ANXA3/CAMP/TLR3	8
GO:1904018	GO:1904018	positive regulation of vasculature development	8/119	181/18723	2.05592e-05	0.00129904	0.000841755	CHI3L1/ITGB8/ADM/THBS1/LRG1/ANXA3/CAMP/TLR3	8
GO:0050829	GO:0050829	defense response to Gram-negative bacterium	6/119	88/18723	2.05797e-05	0.00129904	0.000841755	RNASE3/LTF/CAMP/BPI/RPS19/CD160	6
GO:0050673	GO:0050673	epithelial cell proliferation	12/119	437/18723	2.23876e-05	0.0013849	0.000897388	ALOX5/CEACAM1/SULF2/THBS1/LRG1/ARG1/PROK2/TGFBR3/TNF/AREG/TNFAIP3/CDC42	12
GO:0071706	GO:0071706	tumor necrosis factor superfamily cytokine production	8/119	186/18723	2.50097e-05	0.0014876	0.000963936	THBS1/LTF/BPI/LILRA2/TLR3/SPON2/IFNG/TNFAIP3	8
GO:1903555	GO:1903555	regulation of tumor necrosis factor superfamily cytokine production	8/119	186/18723	2.50097e-05	0.0014876	0.000963936	THBS1/LTF/BPI/LILRA2/TLR3/SPON2/IFNG/TNFAIP3	8
GO:0002440	GO:0002440	production of molecular mediator of immune response	10/119	308/18723	2.74435e-05	0.00157191	0.00101857	IGKV1D-8/IGKV1-17/IGKC/ARG1/XCL1/TLR3/SPON2/TNF/TRDV3/CD160	10
GO:0006909	GO:0006909	phagocytosis	10/119	308/18723	2.74435e-05	0.00157191	0.00101857	IGHE/THBS1/DYSF/ANXA3/IGKC/SPON2/TNF/TRDC/IFNG/CDC42	10
GO:0035747	GO:0035747	natural killer cell chemotaxis	3/119	10/18723	2.90797e-05	0.00163533	0.00105967	CCL4/XCL1/CCL5	3
GO:0050678	GO:0050678	regulation of epithelial cell proliferation	11/119	381/18723	3.17209e-05	0.00175202	0.00113528	ALOX5/CEACAM1/SULF2/THBS1/LRG1/ARG1/TGFBR3/TNF/AREG/TNFAIP3/CDC42	11
GO:0034341	GO:0034341	response to interferon-gamma	7/119	141/18723	3.28335e-05	0.00177188	0.00114814	ARG1/CCL4/XCL1/TLR3/CCL5/IFNG/CDC42	7
GO:0002718	GO:0002718	regulation of cytokine production involved in immune response	6/119	96/18723	3.37812e-05	0.00177188	0.00114814	ARG1/XCL1/TLR3/SPON2/TNF/CD160	6
GO:0050777	GO:0050777	negative regulation of immune response	8/119	194/18723	3.37991e-05	0.00177188	0.00114814	CEACAM1/PGLYRP1/ARG1/XCL1/TNFAIP3/RPS19/PSMB4/CD160	8
GO:0034612	GO:0034612	response to tumor necrosis factor	9/119	253/18723	3.46067e-05	0.00178398	0.00115599	CHI3L1/THBS1/CAMP/LCN2/CCL4/XCL1/CCL5/TNF/TNFAIP3	9
GO:0070555	GO:0070555	response to interleukin-1	7/119	143/18723	3.59364e-05	0.00180982	0.00117273	IL1RN/CHI3L1/CAMP/LCN2/CCL4/XCL1/CCL5	7
GO:2000351	GO:2000351	regulation of endothelial cell apoptotic process	5/119	59/18723	3.62784e-05	0.00180982	0.00117273	THBS1/TNF/AKR1C3/TNFAIP3/CD160	5
GO:0002367	GO:0002367	cytokine production involved in immune response	6/119	98/18723	3.79634e-05	0.00186382	0.00120772	ARG1/XCL1/TLR3/SPON2/TNF/CD160	6
GO:0030656	GO:0030656	regulation of vitamin metabolic process	3/119	11/18723	3.97991e-05	0.00188899	0.00122404	TNF/AKR1C3/IFNG	3
GO:0060557	GO:0060557	positive regulation of vitamin D biosynthetic process	2/119	2/18723	4.00591e-05	0.00188899	0.00122404	TNF/IFNG	2
GO:0031348	GO:0031348	negative regulation of defense response	9/119	258/18723	4.03083e-05	0.00188899	0.00122404	ALOX5/CEACAM1/TNFAIP6/PGLYRP1/ARG1/CST7/TNFAIP3/RPS19/PSMB4	9
GO:0051384	GO:0051384	response to glucocorticoid	7/119	148/18723	4.47613e-05	0.00206637	0.00133897	IL1RN/ADM/ANXA3/ARG1/PAM/TNF/AREG	7
GO:0019221	GO:0019221	cytokine-mediated signaling pathway	12/119	472/18723	4.73825e-05	0.00215521	0.00139654	IL1RN/CEACAM1/ARG1/CXCL1/CSF2RA/LILRA2/CCL4/XCL1/CCL5/TNF/IFNG/TNFAIP3	12
GO:0019835	GO:0019835	cytolysis	4/119	32/18723	4.86127e-05	0.00217912	0.00141203	GZMH/GZMA/GZMB/GZMM	4
GO:0048661	GO:0048661	positive regulation of smooth muscle cell proliferation	6/119	104/18723	5.30586e-05	0.00234443	0.00151915	THBS1/NAMPT/MMP9/PDGFD/CCL5/TNF	6
GO:0071677	GO:0071677	positive regulation of mononuclear cell migration	5/119	65/18723	5.80654e-05	0.00249439	0.00161632	CCL4/XCL1/PDGFD/CCL5/TNF	5
GO:0072577	GO:0072577	endothelial cell apoptotic process	5/119	65/18723	5.80654e-05	0.00249439	0.00161632	THBS1/TNF/AKR1C3/TNFAIP3/CD160	5
GO:0035821	GO:0035821	modulation of process of other organism	6/119	106/18723	5.90391e-05	0.00250148	0.00162091	SLPI/LTF/ARG1/CCL4/CCL5/IFNG	6
GO:0002697	GO:0002697	regulation of immune effector process	10/119	339/18723	6.15778e-05	0.00253947	0.00164553	CEACAM1/PGLYRP1/ARG1/XCL1/TLR3/SPON2/TNF/IFNG/RPS19/CD160	10
GO:0048545	GO:0048545	response to steroid hormone	10/119	339/18723	6.15778e-05	0.00253947	0.00164553	IL1RN/ADM/THBS1/ANXA3/ARG1/NPC1/PAM/TNF/AKR1C3/AREG	10
GO:0002832	GO:0002832	negative regulation of response to biotic stimulus	6/119	108/18723	6.55466e-05	0.00266757	0.00172854	CEACAM1/LTF/ARG1/LILRA2/TNFAIP3/RPS19	6
GO:0031665	GO:0031665	negative regulation of lipopolysaccharide-mediated signaling pathway	3/119	13/18723	6.83468e-05	0.00274541	0.00177898	LTF/LILRA2/TNFAIP3	3
GO:0046686	GO:0046686	response to cadmium ion	5/119	68/18723	7.21766e-05	0.002843	0.00184221	UBE2D3/MMP9/ARG1/NPC1/AKR1C3	5
GO:0002698	GO:0002698	negative regulation of immune effector process	6/119	110/18723	7.26146e-05	0.002843	0.00184221	CEACAM1/PGLYRP1/ARG1/XCL1/TNF/RPS19	6
GO:0002449	GO:0002449	lymphocyte mediated immunity	10/119	350/18723	8.02814e-05	0.00310388	0.00201126	IGHE/CEACAM1/IGKC/ARG1/XCL1/TNF/TRDC/CD160/GZMB/GZMM	10
GO:0097529	GO:0097529	myeloid leukocyte migration	8/119	220/18723	8.20504e-05	0.00312915	0.00202764	PTPRO/THBS1/CXCL1/CCL4/XCL1/PDGFD/CCL5/RPS19	8
GO:0002548	GO:0002548	monocyte chemotaxis	5/119	70/18723	8.29584e-05	0.00312915	0.00202764	PTPRO/CCL4/XCL1/CCL5/RPS19	5
GO:0033212	GO:0033212	iron import into cell	3/119	14/18723	8.65837e-05	0.00318813	0.00206586	STEAP4/LCN2/IFNG	3
GO:0061043	GO:0061043	regulation of vascular wound healing	3/119	14/18723	8.65837e-05	0.00318813	0.00206586	ALOX5/TNF/TNFAIP3	3
GO:0032635	GO:0032635	interleukin-6 production	7/119	165/18723	8.90185e-05	0.00320156	0.00207456	BPI/LILRA2/TLR3/SPON2/TNF/IFNG/TNFAIP3	7
GO:0032675	GO:0032675	regulation of interleukin-6 production	7/119	165/18723	8.90185e-05	0.00320156	0.00207456	BPI/LILRA2/TLR3/SPON2/TNF/IFNG/TNFAIP3	7
GO:0071675	GO:0071675	regulation of mononuclear cell migration	6/119	115/18723	9.29679e-05	0.00330517	0.00214169	THBS1/CCL4/XCL1/PDGFD/CCL5/TNF	6
GO:0001818	GO:0001818	negative regulation of cytokine production	10/119	357/18723	9.45385e-05	0.00332281	0.00215313	CEACAM1/THBS1/PGLYRP1/LTF/BPI/ARG1/XCL1/TNF/IFNG/TNFAIP3	10
GO:2000345	GO:2000345	regulation of hepatocyte proliferation	3/119	15/18723	0.000107728	0.00374385	0.00242595	CEACAM1/SULF2/TNFAIP3	3
GO:0030595	GO:0030595	leukocyte chemotaxis	8/119	230/18723	0.000111726	0.00383965	0.00248803	ALOX5/PTPRO/THBS1/CXCL1/CCL4/XCL1/CCL5/RPS19	8
GO:0009615	GO:0009615	response to virus	10/119	367/18723	0.000118597	0.00389642	0.00252481	ITGB8/ENO1/CCL4/XCL1/TLR3/SPON2/CCL5/TNF/IFNG/TNFAIP3	10
GO:0060559	GO:0060559	positive regulation of calcidiol 1-monooxygenase activity	2/119	3/18723	0.000119677	0.00389642	0.00252481	TNF/IFNG	2
GO:0072535	GO:0072535	tumor necrosis factor (ligand) superfamily member 11 production	2/119	3/18723	0.000119677	0.00389642	0.00252481	LTF/IFNG	2
GO:1904999	GO:1904999	positive regulation of leukocyte adhesion to arterial endothelial cell	2/119	3/18723	0.000119677	0.00389642	0.00252481	ALOX5/TNF	2
GO:2000307	GO:2000307	regulation of tumor necrosis factor (ligand) superfamily member 11 production	2/119	3/18723	0.000119677	0.00389642	0.00252481	LTF/IFNG	2
GO:0050728	GO:0050728	negative regulation of inflammatory response	7/119	176/18723	0.000133146	0.00428978	0.00277971	ALOX5/TNFAIP6/PGLYRP1/CST7/TNFAIP3/RPS19/PSMB4	7
GO:0001909	GO:0001909	leukocyte mediated cytotoxicity	6/119	124/18723	0.000140863	0.00449165	0.00291051	CEACAM1/ARG1/XCL1/CD160/GZMB/GZMM	6
GO:0060326	GO:0060326	cell chemotaxis	9/119	310/18723	0.000163717	0.00516711	0.0033482	ALOX5/PTPRO/THBS1/CXCL1/CCL4/XCL1/PDGFD/CCL5/RPS19	9
GO:0150076	GO:0150076	neuroinflammatory response	4/119	44/18723	0.000173037	0.0054061	0.00350306	MMP9/CST7/TNF/IFNG	4
GO:0002695	GO:0002695	negative regulation of leukocyte activation	7/119	187/18723	0.000193583	0.00598753	0.00387981	CEACAM1/PGLYRP1/BPI/ARG1/XCL1/CST7/TNFAIP3	7
GO:0071560	GO:0071560	cellular response to transforming growth factor beta stimulus	8/119	250/18723	0.000197945	0.00606182	0.00392795	ITGB8/THBS1/LRG1/ARG1/XCL1/PDGFD/TGFBR3/FOLR1	8
GO:0061041	GO:0061041	regulation of wound healing	6/119	134/18723	0.000215077	0.00652188	0.00422607	ALOX5/CEACAM1/THBS1/ENPP4/TNF/TNFAIP3	6
GO:2000117	GO:2000117	negative regulation of cysteine-type endopeptidase activity	5/119	86/18723	0.000220187	0.00661202	0.00428447	THBS1/LTF/MMP9/CST7/TNF	5
GO:0002687	GO:0002687	positive regulation of leukocyte migration	6/119	135/18723	0.000223926	0.00663391	0.00429866	THBS1/CCL4/XCL1/PDGFD/CCL5/TNF	6
GO:0140131	GO:0140131	positive regulation of lymphocyte chemotaxis	3/119	19/18723	0.000225205	0.00663391	0.00429866	CCL4/XCL1/CCL5	3
GO:0071559	GO:0071559	response to transforming growth factor beta	8/119	256/18723	0.000232501	0.00670215	0.00434288	ITGB8/THBS1/LRG1/ARG1/XCL1/PDGFD/TGFBR3/FOLR1	8
GO:0034758	GO:0034758	positive regulation of iron ion transport	2/119	4/18723	0.000238356	0.00670215	0.00434288	LCN2/IFNG	2
GO:0034761	GO:0034761	positive regulation of iron ion transmembrane transport	2/119	4/18723	0.000238356	0.00670215	0.00434288	LCN2/IFNG	2
GO:0046136	GO:0046136	positive regulation of vitamin metabolic process	2/119	4/18723	0.000238356	0.00670215	0.00434288	TNF/IFNG	2
GO:1904440	GO:1904440	positive regulation of iron ion import across plasma membrane	2/119	4/18723	0.000238356	0.00670215	0.00434288	LCN2/IFNG	2
GO:0002831	GO:0002831	regulation of response to biotic stimulus	9/119	327/18723	0.000243472	0.00678433	0.00439613	CD180/CEACAM1/LTF/ARG1/LILRA2/CCL5/TNFAIP3/RPS19/CD160	9
GO:0050832	GO:0050832	defense response to fungus	4/119	49/18723	0.000263545	0.00715518	0.00463643	LTF/ARG1/GNLY/SPON2	4
GO:0070741	GO:0070741	response to interleukin-6	4/119	49/18723	0.000263545	0.00715518	0.00463643	ST3GAL6/CHI3L1/CAMP/LCN2	4
GO:0010893	GO:0010893	positive regulation of steroid biosynthetic process	3/119	20/18723	0.000263722	0.00715518	0.00463643	ADM/TNF/IFNG	3
GO:0050921	GO:0050921	positive regulation of chemotaxis	6/119	141/18723	0.000283225	0.00761753	0.00493603	STX3/THBS1/CCL4/XCL1/PDGFD/CCL5	6
GO:0002275	GO:0002275	myeloid cell activation involved in immune response	5/119	91/18723	0.000286701	0.00764453	0.00495352	DYSF/ANXA3/LILRA2/IFNG/PTGDS	5
GO:0032755	GO:0032755	positive regulation of interleukin-6 production	5/119	93/18723	0.00031719	0.0083852	0.00543346	LILRA2/TLR3/SPON2/TNF/IFNG	5
GO:0030316	GO:0030316	osteoclast differentiation	5/119	94/18723	0.000333325	0.00866366	0.0056139	OSCAR/LTF/TLR3/TNF/IFNG	5
GO:0051702	GO:0051702	biological process involved in interaction with symbiont	5/119	94/18723	0.000333325	0.00866366	0.0056139	LTF/CAMP/ARG1/CCL4/CCL5	5
GO:0061042	GO:0061042	vascular wound healing	3/119	22/18723	0.000352967	0.00894859	0.00579853	ALOX5/TNF/TNFAIP3	3
GO:0072574	GO:0072574	hepatocyte proliferation	3/119	22/18723	0.000352967	0.00894859	0.00579853	CEACAM1/SULF2/TNFAIP3	3
GO:0072575	GO:0072575	epithelial cell proliferation involved in liver morphogenesis	3/119	22/18723	0.000352967	0.00894859	0.00579853	CEACAM1/SULF2/TNFAIP3	3
GO:0042060	GO:0042060	wound healing	10/119	422/18723	0.000363904	0.00915085	0.00592959	ENTPD1/ALOX5/GNAQ/CEACAM1/THBS1/DYSF/NRG1/ENPP4/TNF/TNFAIP3	10
GO:1904035	GO:1904035	regulation of epithelial cell apoptotic process	5/119	96/18723	0.000367454	0.0091656	0.00593915	THBS1/TNF/AKR1C3/TNFAIP3/CD160	5
GO:0002366	GO:0002366	leukocyte activation involved in immune response	8/119	275/18723	0.000376018	0.00930419	0.00602895	CD180/CEACAM1/PGLYRP1/DYSF/ANXA3/LILRA2/IFNG/PTGDS	8
GO:0050866	GO:0050866	negative regulation of cell activation	7/119	210/18723	0.000391733	0.00955948	0.00619438	CEACAM1/PGLYRP1/BPI/ARG1/XCL1/CST7/TNFAIP3	7
GO:1904438	GO:1904438	regulation of iron ion import across plasma membrane	2/119	5/18723	0.000395607	0.00955948	0.00619438	LCN2/IFNG	2
GO:1904997	GO:1904997	regulation of leukocyte adhesion to arterial endothelial cell	2/119	5/18723	0.000395607	0.00955948	0.00619438	ALOX5/TNF	2
GO:0072576	GO:0072576	liver morphogenesis	3/119	23/18723	0.000404036	0.00961598	0.00623099	CEACAM1/SULF2/TNFAIP3	3
GO:0031349	GO:0031349	positive regulation of defense response	8/119	278/18723	0.000404163	0.00961598	0.00623099	ARG1/LILRA2/TLR3/CCL5/TNF/IFNG/RPS19/CD160	8
GO:0002263	GO:0002263	cell activation involved in immune response	8/119	279/18723	0.000413917	0.00977288	0.00633265	CD180/CEACAM1/PGLYRP1/DYSF/ANXA3/LILRA2/IFNG/PTGDS	8
GO:0031341	GO:0031341	regulation of cell killing	5/119	99/18723	0.00042352	0.00992384	0.00643048	CEACAM1/ARG1/XCL1/IFNG/CD160	5
GO:0045071	GO:0045071	negative regulation of viral genome replication	4/119	56/18723	0.000441494	0.0102672	0.00665298	SLPI/LTF/CCL5/TNF	4
GO:0002460	GO:0002460	adaptive immune response based on somatic recombination of immune receptors built from immunoglobulin superfamily domains	9/119	356/18723	0.000452961	0.0104553	0.00677485	IGHE/CEACAM1/IGKC/ARG1/XCL1/TNF/TRDC/TNFAIP3/GZMM	9
GO:2000353	GO:2000353	positive regulation of endothelial cell apoptotic process	3/119	24/18723	0.000459621	0.0105304	0.00682353	THBS1/AKR1C3/CD160	3
GO:0034614	GO:0034614	cellular response to reactive oxygen species	6/119	155/18723	0.000469743	0.0106093	0.00687463	MMP9/LCN2/ARG1/PDGFD/AKR1C3/TNFAIP3	6
GO:0048732	GO:0048732	gland development	10/119	436/18723	0.000469923	0.0106093	0.00687463	CEACAM1/SULF2/NRG1/ARG1/TGFBR3/PAM/TNF/AREG/TNFAIP3/CDC42	10
GO:0070374	GO:0070374	positive regulation of ERK1 and ERK2 cascade	7/119	217/18723	0.000476756	0.0106856	0.00692405	CHI3L1/NRG1/CCL4/XCL1/PDGFD/CCL5/TNF	7
GO:0032677	GO:0032677	regulation of interleukin-8 production	5/119	102/18723	0.000485812	0.0108102	0.00700481	CHI3L1/BPI/LILRA2/TLR3/TNF	5
GO:0045088	GO:0045088	regulation of innate immune response	7/119	218/18723	0.000490019	0.0108259	0.007015	CEACAM1/ARG1/LILRA2/CCL5/TNFAIP3/RPS19/CD160	7
GO:0006826	GO:0006826	iron ion transport	4/119	58/18723	0.000505029	0.0109885	0.00712033	STEAP4/LTF/LCN2/IFNG	4
GO:0032637	GO:0032637	interleukin-8 production	5/119	103/18723	0.000508034	0.0109885	0.00712033	CHI3L1/BPI/LILRA2/TLR3/TNF	5
GO:0032760	GO:0032760	positive regulation of tumor necrosis factor production	5/119	103/18723	0.000508034	0.0109885	0.00712033	THBS1/LILRA2/TLR3/SPON2/IFNG	5
GO:0003094	GO:0003094	glomerular filtration	3/119	25/18723	0.000519883	0.0110137	0.00713668	PTPRO/SULF2/JCHAIN	3
GO:0062009	GO:0062009	secondary palate development	3/119	25/18723	0.000519883	0.0110137	0.00713668	ITGB8/MMP25/TGFBR3	3
GO:1901623	GO:1901623	regulation of lymphocyte chemotaxis	3/119	25/18723	0.000519883	0.0110137	0.00713668	CCL4/XCL1/CCL5	3
GO:0044403	GO:0044403	biological process involved in symbiotic interaction	8/119	290/18723	0.000534436	0.011245	0.00728654	PGLYRP1/LTF/CAMP/ARG1/CCL4/NPC1/CCL5/NCAM1	8
GO:0002820	GO:0002820	negative regulation of adaptive immune response	4/119	59/18723	0.00053912	0.0112669	0.00730074	CEACAM1/ARG1/XCL1/CD160	4
GO:0000302	GO:0000302	response to reactive oxygen species	7/119	222/18723	0.000546044	0.011335	0.00734488	MMP9/LCN2/ARG1/PDGFD/AKR1C3/AREG/TNFAIP3	7
GO:0050920	GO:0050920	regulation of chemotaxis	7/119	223/18723	0.000560818	0.0115641	0.00749331	PTPRO/STX3/THBS1/CCL4/XCL1/PDGFD/CCL5	7
GO:0009620	GO:0009620	response to fungus	4/119	60/18723	0.000574816	0.0117166	0.00759213	LTF/ARG1/GNLY/SPON2	4
GO:0002710	GO:0002710	negative regulation of T cell mediated immunity	3/119	26/18723	0.000584979	0.0117166	0.00759213	CEACAM1/ARG1/XCL1	3
GO:0097205	GO:0097205	renal filtration	3/119	26/18723	0.000584979	0.0117166	0.00759213	PTPRO/SULF2/JCHAIN	3
GO:0043152	GO:0043152	induction of bacterial agglutination	2/119	6/18723	0.000590942	0.0117166	0.00759213	RNASE3/SPON2	2
GO:0061757	GO:0061757	leukocyte adhesion to arterial endothelial cell	2/119	6/18723	0.000590942	0.0117166	0.00759213	ALOX5/TNF	2
GO:0140507	GO:0140507	granzyme-mediated programmed cell death signaling pathway	2/119	6/18723	0.000590942	0.0117166	0.00759213	GZMA/GZMB	2
GO:1903557	GO:1903557	positive regulation of tumor necrosis factor superfamily cytokine production	5/119	107/18723	0.000604652	0.011912	0.00771879	THBS1/LILRA2/TLR3/SPON2/IFNG	5
GO:0002700	GO:0002700	regulation of production of molecular mediator of immune response	6/119	164/18723	0.000632759	0.0123869	0.00802647	ARG1/XCL1/TLR3/SPON2/TNF/CD160	6
GO:0032757	GO:0032757	positive regulation of interleukin-8 production	4/119	62/18723	0.000651192	0.0124301	0.00805449	CHI3L1/LILRA2/TLR3/TNF	4
GO:0032835	GO:0032835	glomerulus development	4/119	62/18723	0.000651192	0.0124301	0.00805449	PTPRO/SULF2/BASP1/PDGFD	4
GO:0002227	GO:0002227	innate immune response in mucosa	3/119	27/18723	0.000655062	0.0124301	0.00805449	RNASE3/LTF/CAMP	3
GO:0002719	GO:0002719	negative regulation of cytokine production involved in immune response	3/119	27/18723	0.000655062	0.0124301	0.00805449	ARG1/XCL1/TNF	3
GO:0034143	GO:0034143	regulation of toll-like receptor 4 signaling pathway	3/119	27/18723	0.000655062	0.0124301	0.00805449	LTF/LILRA2/TNFAIP3	3
GO:0003014	GO:0003014	renal system process	5/119	110/18723	0.0006857	0.0129321	0.0083798	PTPRO/SULF2/ADM/JCHAIN/AKR1C3	5
GO:0031343	GO:0031343	positive regulation of cell killing	4/119	63/18723	0.000691956	0.0129656	0.00840151	ARG1/XCL1/IFNG/CD160	4
GO:1903034	GO:1903034	regulation of response to wounding	6/119	167/18723	0.000695861	0.0129656	0.00840151	ALOX5/CEACAM1/THBS1/ENPP4/TNF/TNFAIP3	6
GO:0002833	GO:0002833	positive regulation of response to biotic stimulus	6/119	168/18723	0.000717942	0.013297	0.00861621	CD180/ARG1/LILRA2/CCL5/RPS19/CD160	6
GO:0045670	GO:0045670	regulation of osteoclast differentiation	4/119	64/18723	0.000734496	0.0134586	0.00872096	LTF/TLR3/TNF/IFNG	4
GO:0001676	GO:0001676	long-chain fatty acid metabolic process	5/119	112/18723	0.000744076	0.0134586	0.00872096	ALOX5/PAM/AKR1C3/ACOT7/PTGDS	5
GO:0032609	GO:0032609	interferon-gamma production	5/119	112/18723	0.000744076	0.0134586	0.00872096	PGLYRP1/XCL1/TLR3/TNF/CD160	5
GO:0032649	GO:0032649	regulation of interferon-gamma production	5/119	112/18723	0.000744076	0.0134586	0.00872096	PGLYRP1/XCL1/TLR3/TNF/CD160	5
GO:0002699	GO:0002699	positive regulation of immune effector process	7/119	235/18723	0.00076422	0.0137426	0.00890499	ARG1/XCL1/SPON2/TNF/IFNG/RPS19/CD160	7
GO:0001819	GO:0001819	positive regulation of cytokine production	10/119	467/18723	0.000798096	0.0142361	0.00922473	CHI3L1/SULF2/THBS1/LILRA2/XCL1/TLR3/SPON2/TNF/IFNG/CD160	10
GO:0070372	GO:0070372	regulation of ERK1 and ERK2 cascade	8/119	309/18723	0.000808644	0.0142361	0.00922473	CHI3L1/CEACAM1/NRG1/CCL4/XCL1/PDGFD/CCL5/TNF	8
GO:0009635	GO:0009635	response to herbicide	2/119	7/18723	0.000823878	0.0142361	0.00922473	LCN2/ARG1	2
GO:0034759	GO:0034759	regulation of iron ion transmembrane transport	2/119	7/18723	0.000823878	0.0142361	0.00922473	LCN2/IFNG	2
GO:0060022	GO:0060022	hard palate development	2/119	7/18723	0.000823878	0.0142361	0.00922473	ITGB8/MMP25	2
GO:0060556	GO:0060556	regulation of vitamin D biosynthetic process	2/119	7/18723	0.000823878	0.0142361	0.00922473	TNF/IFNG	2
GO:0060558	GO:0060558	regulation of calcidiol 1-monooxygenase activity	2/119	7/18723	0.000823878	0.0142361	0.00922473	TNF/IFNG	2
GO:0045940	GO:0045940	positive regulation of steroid metabolic process	3/119	30/18723	0.000896716	0.0154086	0.00998449	ADM/TNF/IFNG	3
GO:0050810	GO:0050810	regulation of steroid biosynthetic process	4/119	69/18723	0.000975299	0.0166663	0.0107995	ADM/TNF/AKR1C3/IFNG	4
GO:0043410	GO:0043410	positive regulation of MAPK cascade	10/119	480/18723	0.000983022	0.0167024	0.0108229	CHI3L1/THBS1/NRG1/CCL4/XCL1/TLR3/PDGFD/CCL5/TNF/CDC42	10
GO:0060055	GO:0060055	angiogenesis involved in wound healing	3/119	31/18723	0.000988213	0.0167024	0.0108229	ALOX5/TNF/TNFAIP3	3
GO:0002761	GO:0002761	regulation of myeloid leukocyte differentiation	5/119	120/18723	0.00101537	0.0169759	0.0110001	CEACAM1/LTF/TLR3/TNF/IFNG	5
GO:0051897	GO:0051897	positive regulation of protein kinase B signaling	5/119	120/18723	0.00101537	0.0169759	0.0110001	CHI3L1/THBS1/NRG1/TNF/AKR1C3	5
GO:1904019	GO:1904019	epithelial cell apoptotic process	5/119	121/18723	0.00105383	0.017263	0.0111861	THBS1/TNF/AKR1C3/TNFAIP3/CD160	5
GO:0036293	GO:0036293	response to decreased oxygen levels	8/119	322/18723	0.00105435	0.017263	0.0111861	ENO1/ADM/THBS1/NAMPT/LCN2/TGFBR3/PAM/B3GAT1	8
GO:0030511	GO:0030511	positive regulation of transforming growth factor beta receptor signaling pathway	3/119	32/18723	0.00108541	0.017263	0.0111861	THBS1/LRG1/TGFBR3	3
GO:0050850	GO:0050850	positive regulation of calcium-mediated signaling	3/119	32/18723	0.00108541	0.017263	0.0111861	NRG1/CCL4/TNF	3
GO:1903846	GO:1903846	positive regulation of cellular response to transforming growth factor beta stimulus	3/119	32/18723	0.00108541	0.017263	0.0111861	THBS1/LRG1/TGFBR3	3
GO:0045824	GO:0045824	negative regulation of innate immune response	4/119	71/18723	0.00108553	0.017263	0.0111861	CEACAM1/ARG1/TNFAIP3/RPS19	4
GO:0051712	GO:0051712	positive regulation of killing of cells of other organism	2/119	8/18723	0.00109394	0.017263	0.0111861	ARG1/IFNG	2
GO:0061044	GO:0061044	negative regulation of vascular wound healing	2/119	8/18723	0.00109394	0.017263	0.0111861	ALOX5/TNF	2
GO:0090650	GO:0090650	cellular response to oxygen-glucose deprivation	2/119	8/18723	0.00109394	0.017263	0.0111861	NAMPT/LCN2	2
GO:0097527	GO:0097527	necroptotic signaling pathway	2/119	8/18723	0.00109394	0.017263	0.0111861	TLR3/TNF	2
GO:0098711	GO:0098711	iron ion import across plasma membrane	2/119	8/18723	0.00109394	0.017263	0.0111861	LCN2/IFNG	2
GO:0002819	GO:0002819	regulation of adaptive immune response	6/119	183/18723	0.00111894	0.0175679	0.0113837	CEACAM1/ARG1/XCL1/TNF/TNFAIP3/CD160	6
GO:0010951	GO:0010951	negative regulation of endopeptidase activity	7/119	252/18723	0.00114787	0.0179311	0.0116191	COL6A3/THBS1/SLPI/LTF/MMP9/CST7/TNF	7
GO:0036336	GO:0036336	dendritic cell migration	3/119	33/18723	0.00118845	0.0184717	0.0119694	ALOX5/CCL5/CDC42	3
GO:0071621	GO:0071621	granulocyte chemotaxis	5/119	125/18723	0.00121856	0.018845	0.0122113	THBS1/CXCL1/CCL4/XCL1/CCL5	5
GO:0070371	GO:0070371	ERK1 and ERK2 cascade	8/119	330/18723	0.00123308	0.0189747	0.0122953	CHI3L1/CEACAM1/NRG1/CCL4/XCL1/PDGFD/CCL5/TNF	8
GO:0006911	GO:0006911	phagocytosis, engulfment	5/119	127/18723	0.00130772	0.0200237	0.012975	IGHE/THBS1/IGKC/TRDC/CDC42	5
GO:0034121	GO:0034121	regulation of toll-like receptor signaling pathway	4/119	75/18723	0.00133174	0.020291	0.0131482	LTF/LILRA2/TLR3/TNFAIP3	4
GO:0032612	GO:0032612	interleukin-1 production	5/119	128/18723	0.00135407	0.0204299	0.0132383	CEACAM1/LILRA2/TNF/IFNG/TNFAIP3	5
GO:0032652	GO:0032652	regulation of interleukin-1 production	5/119	128/18723	0.00135407	0.0204299	0.0132383	CEACAM1/LILRA2/TNF/IFNG/TNFAIP3	5
GO:1903037	GO:1903037	regulation of leukocyte cell-cell adhesion	8/119	336/18723	0.00138238	0.0205318	0.0133043	ALOX5/CEACAM1/ARG1/XCL1/CCL5/TNF/IFNG/CD160	8
GO:0031100	GO:0031100	animal organ regeneration	4/119	76/18723	0.0013989	0.0205318	0.0133043	SULF2/ADM/ANXA3/TGFBR3	4
GO:0002423	GO:0002423	natural killer cell mediated immune response to tumor cell	2/119	9/18723	0.00140065	0.0205318	0.0133043	CEACAM1/CD160	2
GO:0002855	GO:0002855	regulation of natural killer cell mediated immune response to tumor cell	2/119	9/18723	0.00140065	0.0205318	0.0133043	CEACAM1/CD160	2
GO:0019371	GO:0019371	cyclooxygenase pathway	2/119	9/18723	0.00140065	0.0205318	0.0133043	AKR1C3/PTGDS	2
GO:0060267	GO:0060267	positive regulation of respiratory burst	2/119	9/18723	0.00140065	0.0205318	0.0133043	JCHAIN/RPS19	2
GO:2000403	GO:2000403	positive regulation of lymphocyte migration	3/119	35/18723	0.00141255	0.0206086	0.013354	CCL4/XCL1/CCL5	3
GO:0010466	GO:0010466	negative regulation of peptidase activity	7/119	262/18723	0.00143576	0.0208488	0.0135097	COL6A3/THBS1/SLPI/LTF/MMP9/CST7/TNF	7
GO:0050867	GO:0050867	positive regulation of cell activation	9/119	420/18723	0.00145395	0.0210143	0.0136169	IGHE/THBS1/IGKC/LILRA2/XCL1/CCL5/TRDC/IFNG/CD160	9
GO:0001935	GO:0001935	endothelial cell proliferation	6/119	193/18723	0.00146925	0.0211367	0.0136962	ALOX5/THBS1/LRG1/ARG1/PROK2/TNF	6
GO:0019079	GO:0019079	viral genome replication	5/119	131/18723	0.0015004	0.0214848	0.0139218	SLPI/LTF/CCL5/TNF/CDC42	5
GO:0042119	GO:0042119	neutrophil activation	3/119	36/18723	0.00153387	0.0218532	0.0141605	ANXA3/LILRA2/CCL5	3
GO:0061045	GO:0061045	negative regulation of wound healing	4/119	78/18723	0.00154025	0.0218532	0.0141605	ALOX5/CEACAM1/THBS1/TNF	4
GO:0048608	GO:0048608	reproductive structure development	9/119	424/18723	0.0015517	0.0219151	0.0142006	ITGB8/BASP1/MME/ADM/RETN/TLR3/RHOBTB3/ADGRG1/AKR1C3	9
GO:0061458	GO:0061458	reproductive system development	9/119	427/18723	0.00162843	0.0228943	0.0148351	ITGB8/BASP1/MME/ADM/RETN/TLR3/RHOBTB3/ADGRG1/AKR1C3	9
GO:0032147	GO:0032147	activation of protein kinase activity	5/119	134/18723	0.00165805	0.0232052	0.0150366	CHI3L1/GPRC5D/NRG1/TLR3/CCL5	5
GO:0001570	GO:0001570	vasculogenesis	4/119	80/18723	0.00169125	0.0234854	0.0152181	ITGB8/CEACAM1/ADM/TGFBR3	4
GO:0070482	GO:0070482	response to oxygen levels	8/119	347/18723	0.00169326	0.0234854	0.0152181	ENO1/ADM/THBS1/NAMPT/LCN2/TGFBR3/PAM/B3GAT1	8
GO:0002002	GO:0002002	regulation of angiotensin levels in blood	2/119	10/18723	0.00174354	0.0236525	0.0153264	CPA3/MME	2
GO:0002003	GO:0002003	angiotensin maturation	2/119	10/18723	0.00174354	0.0236525	0.0153264	CPA3/MME	2
GO:0034756	GO:0034756	regulation of iron ion transport	2/119	10/18723	0.00174354	0.0236525	0.0153264	LCN2/IFNG	2
GO:0042368	GO:0042368	vitamin D biosynthetic process	2/119	10/18723	0.00174354	0.0236525	0.0153264	TNF/IFNG	2
GO:2001223	GO:2001223	negative regulation of neuron migration	2/119	10/18723	0.00174354	0.0236525	0.0153264	NRG1/ADGRG1	2
GO:0071902	GO:0071902	positive regulation of protein serine/threonine kinase activity	6/119	200/18723	0.0017603	0.0236956	0.0153544	RALB/THBS1/LTF/PDGFD/TNF/IFNG	6
GO:0003158	GO:0003158	endothelium development	5/119	136/18723	0.0017697	0.0236956	0.0153544	COL18A1/CEACAM1/NRG1/LCN2/TNF	5
GO:0099024	GO:0099024	plasma membrane invagination	5/119	136/18723	0.0017697	0.0236956	0.0153544	IGHE/THBS1/IGKC/TRDC/CDC42	5
GO:0097242	GO:0097242	amyloid-beta clearance	3/119	38/18723	0.00179563	0.0238364	0.0154456	MME/TNF/IFNG	3
GO:1903580	GO:1903580	positive regulation of ATP metabolic process	3/119	38/18723	0.00179563	0.0238364	0.0154456	ENO1/SLC4A4/IFNG	3
GO:0006887	GO:0006887	exocytosis	8/119	352/18723	0.00185174	0.0243787	0.015797	RALB/CEACAM1/STX3/ANXA3/CCL5/IFNG/RAB27B/PTGDS	8
GO:0001910	GO:0001910	regulation of leukocyte mediated cytotoxicity	4/119	82/18723	0.00185225	0.0243787	0.015797	CEACAM1/ARG1/XCL1/CD160	4
GO:0043270	GO:0043270	positive regulation of ion transport	7/119	275/18723	0.00189111	0.0247654	0.0160475	LCN2/LILRA2/CCL4/XCL1/CCL5/ABCB1/IFNG	7
GO:0060541	GO:0060541	respiratory system development	6/119	203/18723	0.00189764	0.0247654	0.0160475	CHI3L1/BASP1/MME/ARG1/TNF/CDC42	6
GO:0045785	GO:0045785	positive regulation of cell adhesion	9/119	437/18723	0.00190653	0.0247768	0.016055	ALOX5/STX3/XCL1/ADGRG1/CCL5/TNF/IFNG/CDC42/CD160	9
GO:0002701	GO:0002701	negative regulation of production of molecular mediator of immune response	3/119	39/18723	0.00193631	0.0249542	0.0161699	ARG1/XCL1/TNF	3
GO:2000516	GO:2000516	positive regulation of CD4-positive, alpha-beta T cell activation	3/119	39/18723	0.00193631	0.0249542	0.0161699	XCL1/IFNG/CD160	3
GO:0010631	GO:0010631	epithelial cell migration	8/119	357/18723	0.00202173	0.0259469	0.0168131	CEACAM1/S100P/THBS1/MMP9/ANXA3/LCN2/TNF/IFNG	8
GO:0070266	GO:0070266	necroptotic process	3/119	40/18723	0.00208368	0.026241	0.0170037	PYGL/TLR3/TNF	3
GO:0071276	GO:0071276	cellular response to cadmium ion	3/119	40/18723	0.00208368	0.026241	0.0170037	UBE2D3/MMP9/AKR1C3	3
GO:0150077	GO:0150077	regulation of neuroinflammatory response	3/119	40/18723	0.00208368	0.026241	0.0170037	MMP9/CST7/TNF	3
GO:0045069	GO:0045069	regulation of viral genome replication	4/119	85/18723	0.0021132	0.026241	0.0170037	SLPI/LTF/CCL5/TNF	4
GO:0055072	GO:0055072	iron ion homeostasis	4/119	85/18723	0.0021132	0.026241	0.0170037	STEAP4/LTF/LCN2/IFNG	4
GO:0002725	GO:0002725	negative regulation of T cell cytokine production	2/119	11/18723	0.00212215	0.026241	0.0170037	ARG1/XCL1	2
GO:0071492	GO:0071492	cellular response to UV-A	2/119	11/18723	0.00212215	0.026241	0.0170037	MME/MMP9	2
GO:0090649	GO:0090649	response to oxygen-glucose deprivation	2/119	11/18723	0.00212215	0.026241	0.0170037	NAMPT/LCN2	2
GO:1900222	GO:1900222	negative regulation of amyloid-beta clearance	2/119	11/18723	0.00212215	0.026241	0.0170037	TNF/IFNG	2
GO:0090132	GO:0090132	epithelium migration	8/119	360/18723	0.00212949	0.026241	0.0170037	CEACAM1/S100P/THBS1/MMP9/ANXA3/LCN2/TNF/IFNG	8
GO:0062013	GO:0062013	positive regulation of small molecule metabolic process	5/119	143/18723	0.00220419	0.0270538	0.0175304	ENO1/ADM/SLC4A4/TNF/IFNG	5
GO:0071634	GO:0071634	regulation of transforming growth factor beta production	3/119	41/18723	0.00223784	0.0273444	0.0177187	ITGB8/THBS1/XCL1	3
GO:0002685	GO:0002685	regulation of leukocyte migration	6/119	210/18723	0.00224961	0.0273444	0.0177187	THBS1/CCL4/XCL1/PDGFD/CCL5/TNF	6
GO:0022407	GO:0022407	regulation of cell-cell adhesion	9/119	448/18723	0.00225511	0.0273444	0.0177187	ALOX5/IL1RN/CEACAM1/ARG1/XCL1/CCL5/TNF/IFNG/CD160	9
GO:0010324	GO:0010324	membrane invagination	5/119	144/18723	0.00227207	0.0273444	0.0177187	IGHE/THBS1/IGKC/TRDC/CDC42	5
GO:0014065	GO:0014065	phosphatidylinositol 3-kinase signaling	5/119	144/18723	0.00227207	0.0273444	0.0177187	CEACAM1/PDGFD/CCL5/TNF/CD160	5
GO:0043491	GO:0043491	protein kinase B signaling	6/119	211/18723	0.00230366	0.0276171	0.0178954	CHI3L1/THBS1/NRG1/CCL5/TNF/AKR1C3	6
GO:0090130	GO:0090130	tissue migration	8/119	365/18723	0.0023191	0.0276949	0.0179458	CEACAM1/S100P/THBS1/MMP9/ANXA3/LCN2/TNF/IFNG	8
GO:0070098	GO:0070098	chemokine-mediated signaling pathway	4/119	88/18723	0.00239851	0.0282632	0.0183141	CXCL1/CCL4/XCL1/CCL5	4
GO:0051271	GO:0051271	negative regulation of cellular component movement	8/119	367/18723	0.00239856	0.0282632	0.0183141	PTPRO/ACTN1/THBS1/NRG1/ADGRG1/TGFBR3/TNF/IGFBP3	8
GO:1904037	GO:1904037	positive regulation of epithelial cell apoptotic process	3/119	42/18723	0.0023989	0.0282632	0.0183141	THBS1/AKR1C3/CD160	3
GO:0007189	GO:0007189	adenylate cyclase-activating G protein-coupled receptor signaling pathway	5/119	146/18723	0.00241238	0.0282632	0.0183141	GNAQ/ADM/ADGRE3/ADGRG1/GNAL	5
GO:0042542	GO:0042542	response to hydrogen peroxide	5/119	146/18723	0.00241238	0.0282632	0.0183141	LCN2/ARG1/PDGFD/AREG/TNFAIP3	5
GO:0034599	GO:0034599	cellular response to oxidative stress	7/119	288/18723	0.00245146	0.0286127	0.0185405	ALOX5/MMP9/LCN2/ARG1/PDGFD/AKR1C3/TNFAIP3	7
GO:0001889	GO:0001889	liver development	5/119	147/18723	0.00248485	0.0288934	0.0187224	CEACAM1/SULF2/ARG1/TGFBR3/TNFAIP3	5
GO:2001214	GO:2001214	positive regulation of vasculogenesis	2/119	12/18723	0.00253602	0.0289766	0.0187764	CEACAM1/ADM	2
GO:0097530	GO:0097530	granulocyte migration	5/119	148/18723	0.00255889	0.0289766	0.0187764	THBS1/CXCL1/CCL4/XCL1/CCL5	5
GO:0007159	GO:0007159	leukocyte cell-cell adhesion	8/119	371/18723	0.0025639	0.0289766	0.0187764	ALOX5/CEACAM1/ARG1/XCL1/CCL5/TNF/IFNG/CD160	8
GO:0034142	GO:0034142	toll-like receptor 4 signaling pathway	3/119	43/18723	0.00256696	0.0289766	0.0187764	LTF/LILRA2/TNFAIP3	3
GO:0036230	GO:0036230	granulocyte activation	3/119	43/18723	0.00256696	0.0289766	0.0187764	ANXA3/LILRA2/CCL5	3
GO:0045981	GO:0045981	positive regulation of nucleotide metabolic process	3/119	43/18723	0.00256696	0.0289766	0.0187764	ENO1/SLC4A4/IFNG	3
GO:0071604	GO:0071604	transforming growth factor beta production	3/119	43/18723	0.00256696	0.0289766	0.0187764	ITGB8/THBS1/XCL1	3
GO:1900544	GO:1900544	positive regulation of purine nucleotide metabolic process	3/119	43/18723	0.00256696	0.0289766	0.0187764	ENO1/SLC4A4/IFNG	3
GO:0002377	GO:0002377	immunoglobulin production	6/119	216/18723	0.00258871	0.029116	0.0188666	IGKV1D-8/IGKV1-17/IGKC/XCL1/TNF/TRDV3	6
GO:0010632	GO:0010632	regulation of epithelial cell migration	7/119	292/18723	0.00264733	0.0295884	0.0191728	CEACAM1/THBS1/MMP9/ANXA3/LCN2/TNF/IFNG	7
GO:0010038	GO:0010038	response to metal ion	8/119	373/18723	0.00264985	0.0295884	0.0191728	UBE2D3/THBS1/MMP9/LCN2/ARG1/NPC1/PAM/AKR1C3	8
GO:0061008	GO:0061008	hepaticobiliary system development	5/119	150/18723	0.00271176	0.0301708	0.0195501	CEACAM1/SULF2/ARG1/TGFBR3/TNFAIP3	5
GO:0046879	GO:0046879	hormone secretion	7/119	295/18723	0.00280197	0.0310627	0.0201281	ALOX5/IL1RN/ADM/RETN/CCL5/TNF/IFNG	7
GO:0048525	GO:0048525	negative regulation of viral process	4/119	92/18723	0.00281872	0.0311368	0.0201761	SLPI/LTF/CCL5/TNF	4
GO:0008406	GO:0008406	gonad development	6/119	221/18723	0.00289952	0.0318332	0.0206274	BASP1/RETN/TLR3/RHOBTB3/ADGRG1/AKR1C3	6
GO:0050878	GO:0050878	regulation of body fluid levels	8/119	379/18723	0.00292133	0.0318332	0.0206274	ENTPD1/GNAQ/PTPRO/CEACAM1/ADM/THBS1/ENPP4/PAM	8
GO:0051346	GO:0051346	negative regulation of hydrolase activity	8/119	379/18723	0.00292133	0.0318332	0.0206274	COL6A3/THBS1/SLPI/LTF/MMP9/CST7/TNF/GZMA	8
GO:0071354	GO:0071354	cellular response to interleukin-6	3/119	45/18723	0.00292449	0.0318332	0.0206274	ST3GAL6/CAMP/LCN2	3
GO:0010755	GO:0010755	regulation of plasminogen activation	2/119	13/18723	0.00298469	0.0318332	0.0206274	ENO1/THBS1	2
GO:0034144	GO:0034144	negative regulation of toll-like receptor 4 signaling pathway	2/119	13/18723	0.00298469	0.0318332	0.0206274	LILRA2/TNFAIP3	2
GO:0035745	GO:0035745	T-helper 2 cell cytokine production	2/119	13/18723	0.00298469	0.0318332	0.0206274	ARG1/XCL1	2
GO:0042362	GO:0042362	fat-soluble vitamin biosynthetic process	2/119	13/18723	0.00298469	0.0318332	0.0206274	TNF/IFNG	2
GO:0051709	GO:0051709	regulation of killing of cells of other organism	2/119	13/18723	0.00298469	0.0318332	0.0206274	ARG1/IFNG	2
GO:2000551	GO:2000551	regulation of T-helper 2 cell cytokine production	2/119	13/18723	0.00298469	0.0318332	0.0206274	ARG1/XCL1	2
GO:0002764	GO:0002764	immune response-regulating signaling pathway	9/119	468/18723	0.00301795	0.0320515	0.0207688	IGHE/CEACAM1/LTF/IGKC/LILRA2/TLR3/TRDC/TNFAIP3/CD160	9
GO:0016052	GO:0016052	carbohydrate catabolic process	5/119	154/18723	0.0030372	0.0320515	0.0207688	GK/ENO1/PYGL/SLC4A4/IFNG	5
GO:0002690	GO:0002690	positive regulation of leukocyte chemotaxis	4/119	94/18723	0.00304661	0.0320515	0.0207688	THBS1/CCL4/XCL1/CCL5	4
GO:1903035	GO:1903035	negative regulation of response to wounding	4/119	94/18723	0.00304661	0.0320515	0.0207688	ALOX5/CEACAM1/THBS1/TNF	4
GO:0042886	GO:0042886	amide transport	7/119	301/18723	0.00313202	0.0328384	0.0212787	ALOX5/IL1RN/CCL5/ABCB1/TNF/FOLR1/IFNG	7
GO:0008037	GO:0008037	cell recognition	6/119	225/18723	0.00316765	0.0330998	0.0214481	IGHE/VCAN/IGKC/SPON2/TRDC/FOLR1	6
GO:0002703	GO:0002703	regulation of leukocyte mediated immunity	6/119	226/18723	0.00323748	0.0337156	0.0218471	CEACAM1/ARG1/XCL1/TLR3/TNF/CD160	6
GO:0003073	GO:0003073	regulation of systemic arterial blood pressure	4/119	96/18723	0.00328677	0.0338005	0.0219021	CPA3/PTPRO/MME/ADM	4
GO:0051250	GO:0051250	negative regulation of lymphocyte activation	5/119	157/18723	0.00329915	0.0338005	0.0219021	CEACAM1/PGLYRP1/ARG1/XCL1/TNFAIP3	5
GO:2000377	GO:2000377	regulation of reactive oxygen species metabolic process	5/119	157/18723	0.00329915	0.0338005	0.0219021	ALOX5/THBS1/LCN2/TNF/AKR1C3	5
GO:0045137	GO:0045137	development of primary sexual characteristics	6/119	227/18723	0.00330846	0.0338005	0.0219021	BASP1/RETN/TLR3/RHOBTB3/ADGRG1/AKR1C3	6
GO:0035850	GO:0035850	epithelial cell differentiation involved in kidney development	3/119	47/18723	0.0033112	0.0338005	0.0219021	PTPRO/BASP1/MMP9	3
GO:0097300	GO:0097300	programmed necrotic cell death	3/119	47/18723	0.0033112	0.0338005	0.0219021	PYGL/TLR3/TNF	3
GO:0001667	GO:0001667	ameboidal-type cell migration	9/119	475/18723	0.00332861	0.0338664	0.0219448	CEACAM1/S100P/THBS1/MMP9/ANXA3/LCN2/TNF/FOLR1/IFNG	9
GO:1901216	GO:1901216	positive regulation of neuron death	4/119	97/18723	0.00341156	0.0343712	0.0222719	LCN2/TNF/IFNG/CDC42	4
GO:1990868	GO:1990868	response to chemokine	4/119	97/18723	0.00341156	0.0343712	0.0222719	CXCL1/CCL4/XCL1/CCL5	4
GO:1990869	GO:1990869	cellular response to chemokine	4/119	97/18723	0.00341156	0.0343712	0.0222719	CXCL1/CCL4/XCL1/CCL5	4
GO:0009914	GO:0009914	hormone transport	7/119	306/18723	0.00342914	0.0344361	0.022314	ALOX5/IL1RN/ADM/RETN/CCL5/TNF/IFNG	7
GO:0043922	GO:0043922	negative regulation by host of viral transcription	2/119	14/18723	0.0034677	0.0345987	0.0224194	CCL4/CCL5	2
GO:0070141	GO:0070141	response to UV-A	2/119	14/18723	0.0034677	0.0345987	0.0224194	MME/MMP9	2
GO:0070301	GO:0070301	cellular response to hydrogen peroxide	4/119	98/18723	0.00353953	0.0352019	0.0228102	LCN2/ARG1/PDGFD/TNFAIP3	4
GO:0002444	GO:0002444	myeloid leukocyte mediated immunity	4/119	99/18723	0.00367073	0.0363897	0.0235799	ANXA3/ARG1/SPON2/PTGDS	4
GO:0001913	GO:0001913	T cell mediated cytotoxicity	3/119	49/18723	0.00372784	0.0366038	0.0237186	CEACAM1/XCL1/GZMM	3
GO:0002762	GO:0002762	negative regulation of myeloid leukocyte differentiation	3/119	49/18723	0.00372784	0.0366038	0.0237186	CEACAM1/LTF/TLR3	3
GO:0030225	GO:0030225	macrophage differentiation	3/119	49/18723	0.00372784	0.0366038	0.0237186	MMP9/IFNG/CDC42	3
GO:0006910	GO:0006910	phagocytosis, recognition	4/119	100/18723	0.0038052	0.0371277	0.0240581	IGHE/IGKC/SPON2/TRDC	4
GO:0019218	GO:0019218	regulation of steroid metabolic process	4/119	100/18723	0.0038052	0.0371277	0.0240581	ADM/TNF/AKR1C3/IFNG	4
GO:0006633	GO:0006633	fatty acid biosynthetic process	5/119	163/18723	0.0038713	0.0376538	0.024399	ALOX5/CEACAM1/AKR1C3/ACOT7/PTGDS	5
GO:0050830	GO:0050830	defense response to Gram-positive bacterium	4/119	101/18723	0.00394297	0.0381562	0.0247245	PGLYRP1/RNASE3/CAMP/TNF	4
GO:0050680	GO:0050680	negative regulation of epithelial cell proliferation	5/119	164/18723	0.00397314	0.0381562	0.0247245	ALOX5/CEACAM1/THBS1/TGFBR3/TNF	5
GO:0010820	GO:0010820	positive regulation of T cell chemotaxis	2/119	15/18723	0.00398462	0.0381562	0.0247245	XCL1/CCL5	2
GO:0070886	GO:0070886	positive regulation of calcineurin-NFAT signaling cascade	2/119	15/18723	0.00398462	0.0381562	0.0247245	NRG1/TNF	2
GO:0106058	GO:0106058	positive regulation of calcineurin-mediated signaling	2/119	15/18723	0.00398462	0.0381562	0.0247245	NRG1/TNF	2
GO:1902106	GO:1902106	negative regulation of leukocyte differentiation	4/119	102/18723	0.00408408	0.0389878	0.0252634	CEACAM1/PGLYRP1/LTF/TLR3	4
GO:0019058	GO:0019058	viral life cycle	7/119	317/18723	0.0041583	0.0395742	0.0256434	SLPI/LTF/NPC1/CCL5/TNF/CDC42/NCAM1	7
GO:0071622	GO:0071622	regulation of granulocyte chemotaxis	3/119	51/18723	0.00417507	0.039612	0.0256679	THBS1/XCL1/CCL5	3
GO:0030593	GO:0030593	neutrophil chemotaxis	4/119	103/18723	0.00422856	0.0399891	0.0259122	CXCL1/CCL4/XCL1/CCL5	4
GO:0072593	GO:0072593	reactive oxygen species metabolic process	6/119	239/18723	0.00425361	0.0399891	0.0259122	ALOX5/THBS1/LCN2/HBD/TNF/AKR1C3	6
GO:1903039	GO:1903039	positive regulation of leukocyte cell-cell adhesion	6/119	239/18723	0.00425361	0.0399891	0.0259122	ALOX5/XCL1/CCL5/TNF/IFNG/CD160	6
GO:0002706	GO:0002706	regulation of lymphocyte mediated immunity	5/119	168/18723	0.00439974	0.041113	0.0266405	CEACAM1/ARG1/XCL1/TNF/CD160	5
GO:0002822	GO:0002822	regulation of adaptive immune response based on somatic recombination of immune receptors built from immunoglobulin superfamily domains	5/119	168/18723	0.00439974	0.041113	0.0266405	CEACAM1/ARG1/XCL1/TNF/TNFAIP3	5
GO:0000041	GO:0000041	transition metal ion transport	4/119	105/18723	0.00452782	0.0413769	0.0268115	STEAP4/LTF/LCN2/IFNG	4
GO:0062207	GO:0062207	regulation of pattern recognition receptor signaling pathway	4/119	105/18723	0.00452782	0.0413769	0.0268115	LTF/LILRA2/TLR3/TNFAIP3	4
GO:0001991	GO:0001991	regulation of systemic arterial blood pressure by circulatory renin-angiotensin	2/119	16/18723	0.004535	0.0413769	0.0268115	CPA3/MME	2
GO:0010819	GO:0010819	regulation of T cell chemotaxis	2/119	16/18723	0.004535	0.0413769	0.0268115	XCL1/CCL5	2
GO:0034138	GO:0034138	toll-like receptor 3 signaling pathway	2/119	16/18723	0.004535	0.0413769	0.0268115	TLR3/TNFAIP3	2
GO:0051044	GO:0051044	positive regulation of membrane protein ectodomain proteolysis	2/119	16/18723	0.004535	0.0413769	0.0268115	TNF/IFNG	2
GO:0051770	GO:0051770	positive regulation of nitric-oxide synthase biosynthetic process	2/119	16/18723	0.004535	0.0413769	0.0268115	NAMPT/IFNG	2
GO:2001212	GO:2001212	regulation of vasculogenesis	2/119	16/18723	0.004535	0.0413769	0.0268115	CEACAM1/ADM	2
GO:0001503	GO:0001503	ossification	8/119	408/18723	0.00455352	0.0414236	0.0268418	ALOX5/VCAN/LTF/MMP9/RRAS2/TNF/AREG/COL13A1	8
GO:0002696	GO:0002696	positive regulation of leukocyte activation	8/119	409/18723	0.00462021	0.0419071	0.0271551	IGHE/THBS1/IGKC/XCL1/CCL5/TRDC/IFNG/CD160	8
GO:0002707	GO:0002707	negative regulation of lymphocyte mediated immunity	3/119	53/18723	0.00465357	0.0419811	0.027203	CEACAM1/ARG1/XCL1	3
GO:0006766	GO:0006766	vitamin metabolic process	4/119	106/18723	0.00468266	0.0419811	0.027203	TNF/AKR1C3/FOLR1/IFNG	4
GO:1903707	GO:1903707	negative regulation of hemopoiesis	4/119	106/18723	0.00468266	0.0419811	0.027203	CEACAM1/PGLYRP1/LTF/TLR3	4
GO:1905477	GO:1905477	positive regulation of protein localization to membrane	4/119	106/18723	0.00468266	0.0419811	0.027203	STX3/TNF/IFNG/GZMB	4
GO:0046890	GO:0046890	regulation of lipid biosynthetic process	5/119	171/18723	0.00474045	0.0423764	0.0274591	CEACAM1/ADM/TNF/AKR1C3/IFNG	5
GO:0002823	GO:0002823	negative regulation of adaptive immune response based on somatic recombination of immune receptors built from immunoglobulin superfamily domains	3/119	54/18723	0.00490472	0.0437185	0.0283288	CEACAM1/ARG1/XCL1	3
GO:0016032	GO:0016032	viral process	8/119	415/18723	0.00503632	0.0447625	0.0290053	SLPI/LTF/CCL4/NPC1/CCL5/TNF/CDC42/NCAM1	8
GO:0010566	GO:0010566	regulation of ketone biosynthetic process	2/119	17/18723	0.0051184	0.0451032	0.0292261	ADM/AKR1C3	2
GO:0042448	GO:0042448	progesterone metabolic process	2/119	17/18723	0.0051184	0.0451032	0.0292261	ADM/AKR1C3	2
GO:0060263	GO:0060263	regulation of respiratory burst	2/119	17/18723	0.0051184	0.0451032	0.0292261	JCHAIN/RPS19	2
GO:0061098	GO:0061098	positive regulation of protein tyrosine kinase activity	3/119	55/18723	0.00516392	0.0452865	0.0293449	NRG1/CCL5/AREG	3
GO:0002456	GO:0002456	T cell mediated immunity	4/119	109/18723	0.00516849	0.0452865	0.0293449	CEACAM1/ARG1/XCL1/GZMM	4
GO:0032611	GO:0032611	interleukin-1 beta production	4/119	110/18723	0.00533765	0.0464765	0.030116	LILRA2/TNF/IFNG/TNFAIP3	4
GO:0032651	GO:0032651	regulation of interleukin-1 beta production	4/119	110/18723	0.00533765	0.0464765	0.030116	LILRA2/TNF/IFNG/TNFAIP3	4
GO:0010634	GO:0010634	positive regulation of epithelial cell migration	5/119	176/18723	0.00534938	0.0464765	0.030116	THBS1/MMP9/ANXA3/LCN2/IFNG	5
GO:0001912	GO:0001912	positive regulation of leukocyte mediated cytotoxicity	3/119	56/18723	0.00543123	0.0467799	0.0303126	ARG1/XCL1/CD160	3
GO:0046456	GO:0046456	icosanoid biosynthetic process	3/119	56/18723	0.00543123	0.0467799	0.0303126	ALOX5/AKR1C3/PTGDS	3
GO:1904645	GO:1904645	response to amyloid-beta	3/119	56/18723	0.00543123	0.0467799	0.0303126	NAMPT/MMP9/LCN2	3
GO:0030324	GO:0030324	lung development	5/119	177/18723	0.0054775	0.0467799	0.0303126	CHI3L1/MME/ARG1/TNF/CDC42	5
GO:0062012	GO:0062012	regulation of small molecule metabolic process	7/119	334/18723	0.00550936	0.0467799	0.0303126	CEACAM1/ENO1/ADM/SLC4A4/TNF/AKR1C3/IFNG	7
GO:0014066	GO:0014066	regulation of phosphatidylinositol 3-kinase signaling	4/119	111/18723	0.00551048	0.0467799	0.0303126	CEACAM1/PDGFD/CCL5/TNF	4
GO:0048015	GO:0048015	phosphatidylinositol-mediated signaling	5/119	178/18723	0.00560778	0.0467799	0.0303126	CEACAM1/PDGFD/CCL5/TNF/CD160	5
GO:0061005	GO:0061005	cell differentiation involved in kidney development	3/119	57/18723	0.00570671	0.0467799	0.0303126	PTPRO/BASP1/MMP9	3
GO:0002283	GO:0002283	neutrophil activation involved in immune response	2/119	18/18723	0.00573438	0.0467799	0.0303126	ANXA3/LILRA2	2
GO:0007250	GO:0007250	activation of NF-kappaB-inducing kinase activity	2/119	18/18723	0.00573438	0.0467799	0.0303126	CHI3L1/TLR3	2
GO:0035743	GO:0035743	CD4-positive, alpha-beta T cell cytokine production	2/119	18/18723	0.00573438	0.0467799	0.0303126	ARG1/XCL1	2
GO:0043116	GO:0043116	negative regulation of vascular permeability	2/119	18/18723	0.00573438	0.0467799	0.0303126	CEACAM1/ADM	2
GO:0071360	GO:0071360	cellular response to exogenous dsRNA	2/119	18/18723	0.00573438	0.0467799	0.0303126	RALB/TLR3	2
GO:0001936	GO:0001936	regulation of endothelial cell proliferation	5/119	179/18723	0.00574023	0.0467799	0.0303126	ALOX5/THBS1/LRG1/ARG1/TNF	5
GO:0062197	GO:0062197	cellular response to chemical stress	7/119	337/18723	0.00577845	0.0467799	0.0303126	ALOX5/MMP9/LCN2/ARG1/PDGFD/AKR1C3/TNFAIP3	7
GO:0043525	GO:0043525	positive regulation of neuron apoptotic process	3/119	58/18723	0.00599044	0.0467799	0.0303126	LCN2/TNF/CDC42	3
GO:0030323	GO:0030323	respiratory tube development	5/119	181/18723	0.00601174	0.0467799	0.0303126	CHI3L1/MME/ARG1/TNF/CDC42	5
GO:0048017	GO:0048017	inositol lipid-mediated signaling	5/119	182/18723	0.00615084	0.0467799	0.0303126	CEACAM1/PDGFD/CCL5/TNF/CD160	5
GO:0019369	GO:0019369	arachidonic acid metabolic process	3/119	59/18723	0.00628248	0.0467799	0.0303126	ALOX5/AKR1C3/PTGDS	3
GO:0001927	GO:0001927	exocyst assembly	1/119	1/18723	0.00635582	0.0467799	0.0303126	RALB	1
GO:0001928	GO:0001928	regulation of exocyst assembly	1/119	1/18723	0.00635582	0.0467799	0.0303126	RALB	1
GO:0003147	GO:0003147	neural crest cell migration involved in heart formation	1/119	1/18723	0.00635582	0.0467799	0.0303126	FOLR1	1
GO:0018032	GO:0018032	protein amidation	1/119	1/18723	0.00635582	0.0467799	0.0303126	PAM	1
GO:0032078	GO:0032078	negative regulation of endodeoxyribonuclease activity	1/119	1/18723	0.00635582	0.0467799	0.0303126	GZMA	1
GO:0032113	GO:0032113	regulation of carbohydrate phosphatase activity	1/119	1/18723	0.00635582	0.0467799	0.0303126	IFNG	1
GO:0034147	GO:0034147	regulation of toll-like receptor 5 signaling pathway	1/119	1/18723	0.00635582	0.0467799	0.0303126	TNFAIP3	1
GO:0034148	GO:0034148	negative regulation of toll-like receptor 5 signaling pathway	1/119	1/18723	0.00635582	0.0467799	0.0303126	TNFAIP3	1
GO:0034346	GO:0034346	positive regulation of type III interferon production	1/119	1/18723	0.00635582	0.0467799	0.0303126	TLR3	1
GO:0035746	GO:0035746	granzyme A production	1/119	1/18723	0.00635582	0.0467799	0.0303126	XCL1	1
GO:0035782	GO:0035782	mature natural killer cell chemotaxis	1/119	1/18723	0.00635582	0.0467799	0.0303126	XCL1	1
GO:0036058	GO:0036058	filtration diaphragm assembly	1/119	1/18723	0.00635582	0.0467799	0.0303126	PTPRO	1
GO:0036060	GO:0036060	slit diaphragm assembly	1/119	1/18723	0.00635582	0.0467799	0.0303126	PTPRO	1
GO:0036116	GO:0036116	long-chain fatty-acyl-CoA catabolic process	1/119	1/18723	0.00635582	0.0467799	0.0303126	ACOT7	1
GO:0045994	GO:0045994	positive regulation of translational initiation by iron	1/119	1/18723	0.00635582	0.0467799	0.0303126	TNF	1
GO:0046449	GO:0046449	creatinine metabolic process	1/119	1/18723	0.00635582	0.0467799	0.0303126	MME	1
GO:0060178	GO:0060178	regulation of exocyst localization	1/119	1/18723	0.00635582	0.0467799	0.0303126	RALB	1
GO:0060549	GO:0060549	regulation of fructose 1,6-bisphosphate 1-phosphatase activity	1/119	1/18723	0.00635582	0.0467799	0.0303126	IFNG	1
GO:0060550	GO:0060550	positive regulation of fructose 1,6-bisphosphate 1-phosphatase activity	1/119	1/18723	0.00635582	0.0467799	0.0303126	IFNG	1
GO:0060551	GO:0060551	regulation of fructose 1,6-bisphosphate metabolic process	1/119	1/18723	0.00635582	0.0467799	0.0303126	IFNG	1
GO:0060552	GO:0060552	positive regulation of fructose 1,6-bisphosphate metabolic process	1/119	1/18723	0.00635582	0.0467799	0.0303126	IFNG	1
GO:0060598	GO:0060598	dichotomous subdivision of terminal units involved in mammary gland duct morphogenesis	1/119	1/18723	0.00635582	0.0467799	0.0303126	AREG	1
GO:0061048	GO:0061048	negative regulation of branching involved in lung morphogenesis	1/119	1/18723	0.00635582	0.0467799	0.0303126	TNF	1
GO:0061837	GO:0061837	neuropeptide processing	1/119	1/18723	0.00635582	0.0467799	0.0303126	MME	1
GO:0062112	GO:0062112	fatty acid primary amide biosynthetic process	1/119	1/18723	0.00635582	0.0467799	0.0303126	PAM	1
GO:0062126	GO:0062126	fatty acid primary amide metabolic process	1/119	1/18723	0.00635582	0.0467799	0.0303126	PAM	1
GO:0070429	GO:0070429	negative regulation of nucleotide-binding oligomerization domain containing 1 signaling pathway	1/119	1/18723	0.00635582	0.0467799	0.0303126	TNFAIP3	1
GO:0070953	GO:0070953	regulation of neutrophil mediated killing of fungus	1/119	1/18723	0.00635582	0.0467799	0.0303126	ARG1	1
GO:0070965	GO:0070965	positive regulation of neutrophil mediated killing of fungus	1/119	1/18723	0.00635582	0.0467799	0.0303126	ARG1	1
GO:0150129	GO:0150129	positive regulation of interleukin-33 production	1/119	1/18723	0.00635582	0.0467799	0.0303126	TNF	1
GO:1900280	GO:1900280	negative regulation of CD4-positive, alpha-beta T cell costimulation	1/119	1/18723	0.00635582	0.0467799	0.0303126	CD160	1
GO:1901753	GO:1901753	leukotriene A4 biosynthetic process	1/119	1/18723	0.00635582	0.0467799	0.0303126	ALOX5	1
GO:1902483	GO:1902483	cytotoxic T cell pyroptotic process	1/119	1/18723	0.00635582	0.0467799	0.0303126	GZMA	1
GO:1905377	GO:1905377	response to D-galactose	1/119	1/18723	0.00635582	0.0467799	0.0303126	NAMPT	1
GO:2000196	GO:2000196	positive regulation of female gonad development	1/119	1/18723	0.00635582	0.0467799	0.0303126	RETN	1
GO:2000308	GO:2000308	negative regulation of tumor necrosis factor (ligand) superfamily member 11 production	1/119	1/18723	0.00635582	0.0467799	0.0303126	LTF	1
GO:2000511	GO:2000511	regulation of granzyme A production	1/119	1/18723	0.00635582	0.0467799	0.0303126	XCL1	1
GO:2000513	GO:2000513	positive regulation of granzyme A production	1/119	1/18723	0.00635582	0.0467799	0.0303126	XCL1	1
GO:2000517	GO:2000517	regulation of T-helper 1 cell activation	1/119	1/18723	0.00635582	0.0467799	0.0303126	XCL1	1
GO:2000518	GO:2000518	negative regulation of T-helper 1 cell activation	1/119	1/18723	0.00635582	0.0467799	0.0303126	XCL1	1
GO:2000872	GO:2000872	positive regulation of progesterone secretion	1/119	1/18723	0.00635582	0.0467799	0.0303126	RETN	1
GO:0002281	GO:0002281	macrophage activation involved in immune response	2/119	19/18723	0.00638252	0.0467799	0.0303126	DYSF/IFNG	2
GO:0010759	GO:0010759	positive regulation of macrophage chemotaxis	2/119	19/18723	0.00638252	0.0467799	0.0303126	THBS1/CCL5	2
GO:0043031	GO:0043031	negative regulation of macrophage activation	2/119	19/18723	0.00638252	0.0467799	0.0303126	BPI/CST7	2
GO:0045821	GO:0045821	positive regulation of glycolytic process	2/119	19/18723	0.00638252	0.0467799	0.0303126	SLC4A4/IFNG	2
GO:0048245	GO:0048245	eosinophil chemotaxis	2/119	19/18723	0.00638252	0.0467799	0.0303126	CCL4/CCL5	2
GO:1900221	GO:1900221	regulation of amyloid-beta clearance	2/119	19/18723	0.00638252	0.0467799	0.0303126	TNF/IFNG	2
GO:0051896	GO:0051896	regulation of protein kinase B signaling	5/119	185/18723	0.0065817	0.0479079	0.0310435	CHI3L1/THBS1/NRG1/TNF/AKR1C3	5
GO:0051851	GO:0051851	modulation by host of symbiont process	3/119	60/18723	0.00658288	0.0479079	0.0310435	LTF/CCL4/CCL5	3
GO:1903670	GO:1903670	regulation of sprouting angiogenesis	3/119	60/18723	0.00658288	0.0479079	0.0310435	ALOX5/CEACAM1/THBS1	3
GO:0009636	GO:0009636	response to toxic substance	6/119	262/18723	0.00660357	0.0479456	0.0310679	LCN2/HBD/ARG1/CCL4/CCL5/ABCB1	6
GO:0008217	GO:0008217	regulation of blood pressure	5/119	186/18723	0.00672991	0.0487485	0.0315882	CPA3/PTPRO/MME/ADM/NAMPT	5
GO:0045446	GO:0045446	endothelial cell differentiation	4/119	118/18723	0.0068259	0.0493283	0.0319639	COL18A1/CEACAM1/NRG1/TNF	4
GO:0050730	GO:0050730	regulation of peptidyl-tyrosine phosphorylation	6/119	264/18723	0.00684497	0.0493508	0.0319785	NRG1/PDGFD/CCL5/TNF/IFNG/AREG	6
GO:0043030	GO:0043030	regulation of macrophage activation	3/119	61/18723	0.00689171	0.0494572	0.0320474	THBS1/BPI/CST7	3
GO:2000401	GO:2000401	regulation of lymphocyte migration	3/119	61/18723	0.00689171	0.0494572	0.0320474	CCL4/XCL1/CCL5	3
GO:0002834	GO:0002834	regulation of response to tumor cell	2/119	20/18723	0.00706239	0.0496454	0.0321693	CEACAM1/CD160	2
GO:0002837	GO:0002837	regulation of immune response to tumor cell	2/119	20/18723	0.00706239	0.0496454	0.0321693	CEACAM1/CD160	2
GO:0007097	GO:0007097	nuclear migration	2/119	20/18723	0.00706239	0.0496454	0.0321693	SYNE2/CDC42	2
GO:0009110	GO:0009110	vitamin biosynthetic process	2/119	20/18723	0.00706239	0.0496454	0.0321693	TNF/IFNG	2
GO:0042359	GO:0042359	vitamin D metabolic process	2/119	20/18723	0.00706239	0.0496454	0.0321693	TNF/IFNG	2
GO:0061318	GO:0061318	renal filtration cell differentiation	2/119	20/18723	0.00706239	0.0496454	0.0321693	PTPRO/BASP1	2
GO:0072112	GO:0072112	glomerular visceral epithelial cell differentiation	2/119	20/18723	0.00706239	0.0496454	0.0321693	PTPRO/BASP1	2
GO:1902004	GO:1902004	positive regulation of amyloid-beta formation	2/119	20/18723	0.00706239	0.0496454	0.0321693	TNF/IFNG	2
GO:2000010	GO:2000010	positive regulation of protein localization to cell surface	2/119	20/18723	0.00706239	0.0496454	0.0321693	STX3/TNF	2
GO:0045861	GO:0045861	negative regulation of proteolysis	7/119	351/18723	0.00716646	0.0498826	0.032323	COL6A3/THBS1/SLPI/LTF/MMP9/CST7/TNF	7
GO:0010573	GO:0010573	vascular endothelial growth factor production	3/119	62/18723	0.00720902	0.0498826	0.032323	SULF2/ADGRG1/TNF	3
GO:0032615	GO:0032615	interleukin-12 production	3/119	62/18723	0.00720902	0.0498826	0.032323	THBS1/TLR3/IFNG	3
GO:0032655	GO:0032655	regulation of interleukin-12 production	3/119	62/18723	0.00720902	0.0498826	0.032323	THBS1/TLR3/IFNG	3
GO:0032731	GO:0032731	positive regulation of interleukin-1 beta production	3/119	62/18723	0.00720902	0.0498826	0.032323	LILRA2/TNF/IFNG	3
GO:0070265	GO:0070265	necrotic cell death	3/119	62/18723	0.00720902	0.0498826	0.032323	PYGL/TLR3/TNF	3
GO:1903078	GO:1903078	positive regulation of protein localization to plasma membrane	3/119	62/18723	0.00720902	0.0498826	0.032323	STX3/TNF/IFNG	3
