# Supplementary material for: Identification of crucial extracellular genes as potential biomarkers in newly diagnosed Type 1 diabetes via integrated bioinformatics analysis
Source: PeerJ journal article supplement (doi:10.7717/peerj.18660), 2025-01-09
Supplement: Table_S5.docx [file Table_S5.docx]

**Table S5.** Top10 EP-DEGs by 10 topological analysis methods of CytoHubba in Cytoscape

| MCC | MNC | Degree | EPC | BottleNeck | EcCentricity | Closeness | Radiality | Betweenness | Stress |
| --- | --- | --- | --- | --- | --- | --- | --- | --- | --- |
| CCL4 | TNF | TNF | TNF | TNF | XCL1 | TNF | TNF | TNF | TNF |
| CCL5 | CCL5 | MMP9 | CCL5 | CCL4 | CST7 | MMP9 | CCL4 | CCL4 | CCL4 |
| TNF | MMP9 | CCL5 | CCL4 | NCAM1 | CXCL1 | CCL5 | MMP9 | GNAQ | MMP9 |
| IFNG | CCL4 | CCL4 | IFNG | MMP9 | TNF | CCL4 | CCL5 | MMP9 | GNAQ |
| MMP9 | IFNG | GZMB | MMP9 | GNAQ | ARG1 | IFNG | CXCL1 | GZMB | GZMB |
| GZMB | GZMB | IFNG | GZMB | ENO1 | GZMB | GZMB | IFNG | CDC42 | CCL5 |
| LCN2 | CXCL1 | CXCL1 | CXCL1 | COL6A3 | GNLY | CXCL1 | GZMB | NCAM1 | NCAM1 |
| IL1RN | LCN2 | LCN2 | GZMA | COL18A1 | IFNG | LCN2 | NCAM1 | THBS1 | CDC42 |
| GZMA | GZMA | GZMA | GNLY | GZMB | CCL4 | NCAM1 | LCN2 | CPA3 | COL6A3 |
| GNLY | GNLY | CAMP | LCN2 | XCL1 | CCL5 | GNLY | GNLY | COL6A3 | CAMP |
