# Supplementary material for: Identification of crucial extracellular genes as potential biomarkers in newly diagnosed Type 1 diabetes via integrated bioinformatics analysis
Source: PeerJ journal article supplement (doi:10.7717/peerj.18660), 2025-01-09
Supplement: Table_S6.xlsx [file Table_S6.xlsx]

## Sheet: 427447Table S6
probe_ids	GSM826974	GSM826975	GSM826976	GSM826977	GSM826978	GSM826979	GSM826980	GSM826981	GSM826982	GSM826983	GSM826984	GSM826985	GSM826986	GSM826987	GSM826988	GSM826989	GSM826990	GSM826991	GSM826992	GSM826993	GSM826994	GSM826995
ILMN_1343291	14.522	14.2976	14.2292	14.4426	14.6232	14.6638	14.6638	14.7055	14.3072	14.4316	13.9891	14.2334	14.2575	14.1142	14.1538	14.1056	14.0309	14.182	13.8984	14.0176	14.0309	13.9944
ILMN_1343295	12.26	12.088	12.4199	12.3639	12.2828	12.5803	12.5467	12.6115	12.0449	12.7445	12.9165	12.7796	12.7311	12.9654	13.1523	13.1095	12.8047	13.1662	13.1734	13.0099	12.8749	12.9043
ILMN_1651199	7.08068	7.0857	7.05129	7.038	7.07099	7.07347	7.11291	7.1289	7.16965	7.18215	6.60896	6.7324	6.65926	6.71991	6.60896	6.71793	6.75248	6.77305	6.70965	6.64774	6.7703	6.83484
ILMN_1651209	7.18691	7.14313	7.15746	7.11291	7.09529	7.1289	7.15232	7.11444	7.13008	7.13061	6.85968	7.03509	6.8564	6.79778	6.85771	6.78032	6.82554	6.86777	6.85941	6.85004	6.83475	6.77675
ILMN_1651210	7.03737	7.12436	7.12074	7.05656	7.05493	7.02807	7.02736	6.98847	7.06122	7.06122	6.58139	6.60083	6.5931	6.53506	6.62637	6.52861	6.59818	6.64613	6.63876	6.51602	6.63689	6.52263
ILMN_1651221	7.09031	7.11444	7.09154	7.08192	7.24582	7.22762	7.13061	7.24582	7.08956	7.25947	6.83676	6.68568	6.67866	6.7416	6.90076	6.7208	6.72747	6.65936	6.63259	6.83017	6.68529	6.67909
ILMN_1651228	9.83591	9.68312	9.81313	9.82181	9.92816	10.2891	9.68474	10.1763	9.69808	10.0116	7.56853	7.14164	7.14613	7.78008	7.8388	7.21862	7.56887	7.71681	7.35137	7.80604	7.79067	7.74226
ILMN_1651229	7.59793	7.52596	7.42723	7.40422	7.45743	7.56629	7.45378	7.18634	7.29776	7.23584	7.24527	7.21865	7.29005	7.33912	6.85997	6.90219	7.1789	6.85481	6.95832	7.4105	6.89701	6.7429
ILMN_1651230	7.03737	7.0857	7.09154	7.1042	7.05493	7.15344	7.12163	7.11444	7.05266	7.06122	6.76778	6.59022	6.82051	6.72364	6.88248	6.56145	6.7429	6.68394	6.65004	6.67376	6.69014	6.89343
ILMN_1651232	7.34062	7.26903	7.15746	7.22998	7.26903	7.49934	7.24685	7.11444	7.24685	7.36005	7.025	7.0105	6.97031	7.0119	6.79712	6.80407	6.91995	7.10157	6.76435	6.96958	6.86334	7.14875
ILMN_1651235	7.09753	7.11444	7.10231	7.05656	7.16965	7.16257	7.18215	7.11444	7.07988	7.009	6.8674	6.69036	6.76552	6.70376	6.73802	6.89469	6.84713	6.7844	6.71925	6.78149	6.7913	6.62133
ILMN_1651236	7.15292	7.12436	7.21794	7.29425	7.23982	7.11955	7.20347	7.16257	7.19024	7.27394	6.84733	6.84981	6.71406	6.75176	6.80798	6.83017	6.7311	6.80625	6.72485	6.7416	6.74301	6.86079
ILMN_1651237	7.18215	6.96454	7.08192	7.05656	7.06249	7.0109	7.05986	7.16257	7.05266	7.11291	6.64455	6.71054	6.54445	6.57491	6.64217	6.57614	6.56676	6.76807	6.73371	6.53867	6.76415	6.69886
ILMN_1651238	7.07224	7.05656	7.16498	6.97138	7.02736	7.02807	7.13061	6.98847	7.18215	7.12163	6.7553	7.01296	6.63772	6.69385	6.69916	6.61051	6.81283	6.84243	6.60089	6.68765	6.64178	6.69231
ILMN_1651249	7.02736	7.05656	7.04304	7.15431	7.16125	7.08253	7.08068	7.01218	7.13008	7.14066	6.68316	6.69405	6.71904	6.67246	6.78691	6.74658	6.77432	6.76053	6.76308	6.85891	6.74905	6.6856
ILMN_1651253	7.13008	7.06611	7.13008	7.06474	7.09529	7.17141	7.12163	7.20005	7.13872	7.02964	6.80541	6.81446	6.84713	6.82579	6.68879	6.71086	6.62979	6.76669	6.7071	6.81712	6.84904	6.67595
ILMN_1651254	8.9817	9.42231	9.1979	8.83839	9.26256	9.46106	9.42188	9.23741	9.94325	9.47075	8.92975	8.82677	8.92615	8.8101	7.83806	8.93389	8.7804	8.65941	8.81869	9.27297	8.95975	8.954
ILMN_1651259	7.21211	7.09467	7.02231	7.12074	7.19888	7.04793	7.07018	7.03675	7.08956	7.01894	6.89817	6.79121	6.60406	6.86387	6.64993	6.73204	6.81977	6.79871	6.66662	6.71352	6.69014	6.76925
ILMN_1651260	7.03737	7.0168	7.13989	7.038	7.02736	6.98085	7.07018	7.1289	6.99798	6.99878	6.80655	6.83988	6.65799	6.58538	6.61051	6.66636	6.68341	6.59214	6.70478	6.61667	6.87518	6.58938
ILMN_1651262	11.0499	11.3432	11.4141	11.4085	11.5907	10.2797	11.3319	10.2186	11.5605	10.3022	11.1517	10.7758	10.9783	11.269	10.2028	10.5728	11.3483	10.2753	11.0405	10.9765	11.1465	9.91855
ILMN_1651268	7.16819	7.24861	7.2116	7.20171	7.2193	7.1804	7.15232	7.36061	7.25313	7.11291	6.6424	6.78358	6.9175	6.91216	6.80541	6.88897	6.90248	7.05856	6.84963	6.76573	6.94425	6.72902
ILMN_1651278	7.52972	7.52025	7.44053	7.52972	7.53642	8.58229	7.88503	8.58853	7.72624	9.09988	7.47257	7.60842	7.40924	7.40967	8.48605	8.87194	8.01605	8.87859	8.15599	8.15998	8.27179	8.43984
ILMN_1651279	7.16073	7.11444	7.10231	7.08956	7.08876	7.1289	7.09031	7.07099	7.07988	7.15232	6.70577	6.63984	6.60285	6.58404	6.80304	6.62356	6.61978	6.70443	6.74776	6.72616	6.56597	6.62133
ILMN_1651281	6.94122	7.06611	7.05129	7.01434	7.04582	7.00197	7.02736	7.05986	7.04526	7.10291	6.87085	6.74776	6.65534	6.48349	6.70942	6.7401	6.75248	6.78294	6.74776	6.87105	6.81589	6.6856
ILMN_1651282	7.02736	7.1042	7.10231	7.1042	6.98085	7.09276	7.08068	7.05986	7.01607	7.13061	6.75414	6.64634	6.63772	6.77769	6.69126	6.70699	6.74905	6.7844	6.75669	6.69821	6.78367	6.69742
ILMN_1651285	7.28789	7.0762	7.17383	7.19579	7.16125	7.13759	7.14254	7.11444	7.09674	7.19299	6.7553	6.90585	6.79664	6.7859	7.07628	6.69405	6.87282	6.7311	6.7553	6.79101	6.9177	6.6856
ILMN_1651286	7.36005	7.18835	7.32319	7.34183	7.34183	7.46409	7.27902	7.38115	7.23522	7.28643	6.95179	6.72781	6.70942	6.86474	6.85382	6.81128	6.78362	6.94026	6.74279	6.80831	6.78705	6.7399
ILMN_1651288	7.15292	7.17898	7.13989	7.14254	7.08068	7.17141	7.25796	7.1042	7.11366	7.12163	6.58794	6.65799	6.64668	6.66216	6.65672	6.64519	6.64817	6.59901	6.70053	6.71086	6.71741	6.69886
ILMN_1651292	7.16073	6.96454	7.11222	7.01434	7.2135	7.05656	7.17273	7.00141	7.13008	7.12163	6.81908	6.87518	6.76945	6.88673	6.78566	6.8683	6.95346	6.66226	6.60539	6.69821	6.70586	6.85024
ILMN_1651296	7.29942	7.36582	7.44053	7.57945	7.54619	9.02245	8.22789	8.83621	7.57241	8.17854	7.64129	7.32467	7.93405	7.1593	7.87473	8.82966	7.56441	8.59856	7.75848	7.99188	7.72742	7.50962
ILMN_1651303	7.05493	7.06611	7.02231	7.13476	7.15344	7.04793	7.11291	7.07099	7.01607	7.07224	6.77082	6.67575	6.59662	6.7311	6.77072	6.60896	6.8117	6.66385	6.64305	6.83767	6.51975	6.70365
ILMN_1651309	7.1042	7.13293	7.04304	7.14254	7.08876	7.04793	7.13061	7.04731	7.06122	7.10291	6.71508	6.72474	6.68879	6.65942	6.70043	6.89469	6.74776	6.64753	6.75156	6.64902	6.73096	6.89505
ILMN_1651310	7.21211	7.24097	7.18215	7.14254	7.08876	7.10291	7.22527	7.09337	7.16184	7.10291	6.75647	6.99304	6.88916	6.67757	6.82846	6.72485	6.76308	6.69328	6.78609	6.69677	6.75367	6.93002
ILMN_1651315	9.01504	9.17097	9.02376	8.95653	9.1979	9.92032	9.42188	10.0515	9.25268	9.2823	9.31241	9.96323	9.9829	9.11739	9.70393	10.0632	10.1825	10.3177	9.6224	9.17811	9.97106	9.91735
ILMN_1651316	7.15292	7.11444	7.05129	7.17642	7.19888	7.58741	7.09031	7.20005	7.11366	7.16257	6.73501	6.7429	6.68745	6.76533	6.73956	6.73052	6.60645	6.7429	6.96279	6.7185	6.76837	6.85661
ILMN_1651325	7.03737	7.19579	7.08192	7.05656	7.08068	7.1289	7.09031	7.02528	7.09674	7.09154	6.86157	6.88371	6.80304	6.79246	6.70699	6.75752	6.68341	6.65672	6.7553	6.75681	6.81731	6.76308
ILMN_1651328	7.1446	7.16125	7.18215	7.2574	7.25082	7.3087	7.25796	7.1042	7.2042	7.23584	6.92719	6.88559	7.03569	6.85493	6.80923	6.80975	6.99892	6.83189	6.87714	6.94743	6.7913	6.77992
ILMN_1651329	7.18691	7.11444	7.12074	7.18952	7.24582	7.11955	7.13061	7.36061	7.14512	7.27394	6.72333	6.59891	6.70089	6.75402	6.73555	6.7208	6.77675	6.73501	6.77546	6.78986	6.83341	6.73371
ILMN_1651330	7.03737	7.04731	7.02231	6.95298	6.99048	7.06474	7.07018	7.02528	7.05266	7.10291	6.65304	6.69742	6.59662	6.63129	6.54509	6.56696	6.57872	6.74528	6.558	6.62849	6.71396	6.60083
ILMN_1651336	7.35009	7.33726	7.33868	7.33334	7.18215	7.00197	7.13061	7.00141	7.22364	7.009	6.84733	6.78032	6.98886	7.00641	6.57087	6.64519	6.94043	6.60155	6.85941	6.82143	6.70586	6.76925
ILMN_1651339	7.15292	7.19579	7.13008	7.16257	7.1289	8.00013	7.13061	7.77916	7.09674	8.05314	6.77546	6.7198	6.67481	6.8595	7.7079	7.64885	6.68341	7.6005	7.11161	6.96598	7.01374	7.83494
ILMN_1651341	7.13008	7.24097	7.18215	7.15431	7.2193	7.25796	7.15232	7.18634	7.21794	7.28643	7.11473	6.91282	6.80975	6.91541	6.83969	6.95665	6.85024	6.79995	6.88262	6.91367	6.85245	6.80304
ILMN_1651343	7.15292	7.14313	7.15746	7.09529	7.1042	7.04793	7.12163	7.17383	7.13872	7.03871	6.84184	7.22926	6.80159	6.65683	6.76298	6.86434	6.64923	6.67291	6.60386	6.77546	7.06213	6.91904
ILMN_1651346	9.0334	9.40321	8.90892	9.0822	8.62308	8.73958	8.74108	8.97301	9.10225	9.2887	8.6055	8.66202	8.49787	8.63071	9.11533	9.47202	8.74439	8.92506	8.99919	9.09249	8.91863	9.34447
ILMN_1651347	10.357	9.9156	9.9577	9.735	10.4901	11.2206	10.8127	11.6978	10.2396	11.7799	10.1739	10.3523	10.1559	10.3361	10.4185	11.3543	10.6608	12.2667	10.961	11.2247	10.8503	11.7928
ILMN_1651351	7.08068	7.1042	7.07224	7.08956	7.1289	7.18952	7.05986	7.15174	7.06122	7.07224	6.82105	6.68735	6.70699	6.90985	6.82579	6.70699	6.7405	6.67187	6.71133	6.61775	6.69618	6.61752
ILMN_1651354	7.09031	7.11444	7.15746	7.11291	7.11291	7.1289	7.10231	7.01218	7.16184	7.08192	6.60896	6.71054	6.78628	6.81478	7.70885	6.6204	6.80348	6.68937	6.62497	6.78149	6.69923	6.89848
ILMN_1651358	7.07224	7.12436	7.04304	7.08956	7.01894	7.11955	6.99577	7.03675	7.12163	7.02964	6.8116	6.81726	6.67595	6.72134	6.78168	6.77602	6.80348	6.67438	6.60386	6.66341	6.83341	6.69024
ILMN_1651364	7.31478	7.28789	7.44053	7.2135	7.16965	7.17141	7.25796	7.1382	7.37066	7.22527	6.73576	6.79121	6.88498	6.90909	6.71741	6.78579	6.93151	6.77915	6.81024	6.97287	6.99744	6.86218
ILMN_1651365	7.09753	7.16965	7.08192	7.06474	7.00822	7.09276	7.13061	7.2135	7.07099	7.009	6.68664	6.70078	6.69484	6.67246	6.67947	6.82225	6.77915	6.71681	6.71264	6.63253	6.69618	6.76637
ILMN_1651369	7.07224	7.16965	7.15746	7.19579	7.1042	7.07347	7.16257	7.1289	7.11366	7.15232	6.75295	6.65281	6.69385	6.69024	6.71075	6.69024	6.71793	6.82225	6.74776	6.68652	6.78545	6.67731
ILMN_1651370	7.09031	7.0168	7.14838	7.06474	7.02736	7.11955	7.16257	7.20005	7.03531	7.05001	6.79664	6.78483	6.74419	6.79472	6.73662	7.07619	6.83969	6.83058	6.86936	6.85583	6.64025	6.65304
ILMN_1651373	7.07224	7.06611	7.13989	7.06474	7.00077	7.09276	7.05986	7.02528	7.06122	7.08192	6.6642	6.72631	6.81107	6.72134	6.9748	6.76925	6.668	6.78806	6.78986	6.82143	6.5892	6.70689
ILMN_1651378	7.77916	7.72349	7.75928	7.82778	7.80367	8.00389	7.65855	7.96278	7.88009	7.80865	7.86066	8.06516	7.87428	7.62581	8.02548	8.23638	7.90297	7.92619	7.89068	7.53607	8.11041	7.65141
ILMN_1651380	7.00822	7.17898	7.04304	7.06474	7.18215	7.09276	7.26855	7.09337	6.9704	7.2042	6.68206	6.68735	6.64902	6.64134	6.59575	6.62822	6.67595	6.69809	6.72892	6.62438	6.71396	6.6723
ILMN_1651385	7.8183	8.23148	7.78661	8.27495	8.16704	8.6215	7.92304	8.3414	8.21723	8.53139	8.33523	8.41782	8.53037	8.45073	8.3618	9.16173	8.45969	8.20374	8.26214	8.14901	8.15128	8.66162
ILMN_1651388	7.09031	7.12436	7.18215	7.08956	7.09529	7.11222	7.16257	7.1382	7.11366	7.07224	6.85583	6.69036	6.70577	6.65809	6.59191	6.75752	6.81516	6.83969	6.69126	6.79101	6.62356	6.64123
ILMN_1651395	7.15292	7.04731	7.05129	7.08192	7.11291	7.13759	7.20347	7.08192	7.06122	7.09154	6.67051	6.56646	6.62999	6.70509	6.59444	6.56696	6.63516	6.64178	6.67595	6.71352	6.59818	6.61231
ILMN_1651396	7.19385	7.11444	7.12074	7.038	7.02736	7.10291	7.05986	7.1042	7.04526	7.03871	6.68664	6.86296	6.71065	6.51644	6.71489	6.7039	6.67198	6.70211	6.69271	6.59047	6.57685	6.73685
ILMN_1651403	7.1042	7.06611	7.06249	7.15098	7.16965	7.22762	7.14254	7.17383	7.17642	7.14066	6.7887	6.7071	6.72474	6.67757	6.69663	6.79121	6.84914	6.75414	6.77546	6.73814	6.78052	6.77072
ILMN_1651404	7.16073	7.19579	7.13989	7.30728	7.2193	7.09276	7.24685	7.1382	7.16184	7.08192	6.75099	6.75414	6.72702	6.89245	7.02996	6.63538	6.72978	6.77183	6.6818	6.87105	6.87255	6.80559
ILMN_1651405	9.0102	8.9859	9.12689	9.00169	9.20887	9.1625	8.8219	9.09751	9.20059	8.98451	9.18696	9.63197	9.78904	9.25056	9.29973	9.46892	9.60407	9.19803	9.20702	9.01834	9.48029	8.93285
ILMN_1651408	7.1042	7.15232	7.14838	7.02373	7.1382	7.19888	7.18215	7.15174	7.16184	7.2983	6.7553	6.76797	6.72791	6.70642	6.82203	6.69271	6.78483	6.64063	6.65281	6.70089	6.70931	6.67909
ILMN_1651415	7.17383	7.06611	7.10231	7.01434	7.25082	7.16257	7.04793	7.07099	7.12163	7.16257	6.76542	6.83667	6.75444	6.70912	6.88613	6.97979	7.00641	6.80758	6.97121	6.7859	7.01374	6.83484
ILMN_1651428	7.08068	7.04731	7.13989	6.95298	7.08068	7.08253	7.11291	7.01218	7.07099	7.02964	6.79444	6.77129	6.65028	6.69385	6.75034	6.84152	6.79082	6.61158	6.77546	6.83667	6.67731	6.73074
ILMN_1651429	7.22877	7.2135	7.10231	7.11291	7.09529	7.24685	7.05986	7.2135	7.15344	7.2983	6.77082	6.79726	6.94372	6.80758	6.74905	7.32189	7.02124	6.80502	6.99321	6.83017	6.88489	6.84411
ILMN_1651430	7.12163	7.05656	7.31536	6.97138	7.19138	7.15344	7.03737	7.17383	7.06122	7.01894	6.58383	6.80502	6.80646	6.73911	6.70566	6.66216	6.72485	6.75187	6.77546	6.74905	6.56597	6.71154
ILMN_1651433	8.93006	8.93853	8.58184	8.97291	8.46561	7.68287	8.70247	8.11845	9.01659	7.83647	8.48105	8.38429	8.15098	8.49953	7.95783	7.61306	8.66459	7.969	8.27219	8.52089	8.35467	8.40512
ILMN_1651435	7.05493	7.1042	7.12074	7.05656	7.07099	7.1289	7.20347	7.1289	7.07988	7.01894	6.71154	6.55511	6.67866	6.81702	6.72892	6.69405	6.6745	6.7844	6.75925	6.7429	6.5323	6.84559
ILMN_1651437	7.17383	7.13293	7.2116	7.15098	7.20528	7.11222	7.27902	7.18634	7.1975	7.23584	6.89884	6.90021	6.86505	6.85592	6.97636	7.11161	6.77222	6.88829	6.81731	6.87282	6.89853	6.8382
ILMN_1651438	8.22484	8.07115	8.38849	8.63513	8.48106	8.31809	8.21068	8.16325	8.15312	7.7106	8.40765	7.94763	8.19249	8.7094	8.35276	8.39876	8.08235	7.69511	8.25017	8.52275	7.94744	8.53176
ILMN_1651447	7.19385	7.05656	7.11222	7.02373	7.15344	7.11222	7.10231	7.03675	7.1042	7.09154	6.79444	6.68394	6.73263	6.67491	6.65523	6.82744	6.72167	6.7429	6.85163	6.69677	6.63198	6.67595
ILMN_1651453	7.16819	7.09467	7.14838	7.11291	7.18215	7.1289	7.16257	7.16257	7.14512	7.09154	6.77769	6.76955	6.61026	6.7687	6.77778	6.71376	6.73605	6.74905	6.72212	6.74905	6.67387	6.70509
ILMN_1651456	7.12163	7.13293	7.11222	7.1042	7.08876	7.04793	7.05986	7.08192	7.04526	7.05001	6.7416	6.56516	6.65672	6.73802	6.63153	6.72343	6.72293	6.84866	6.7376	6.78362	6.74627	6.71489
ILMN_1651457	7.04582	7.0857	7.07224	7.07224	7.09529	7.09276	7.09031	7.1042	7.14512	7.02964	6.74419	6.76317	6.80861	6.64519	6.67947	6.64923	6.79871	6.79121	6.67072	6.61775	6.76837	6.70965
ILMN_1651464	7.20528	7.0857	7.13008	7.11291	7.17642	7.09276	7.11291	7.08192	7.13008	7.14066	6.95179	6.76317	6.78032	7.00567	6.76426	6.85968	6.81283	6.84981	6.72045	6.80717	6.98557	6.98327
ILMN_1651466	7.09031	7.0268	7.10231	7.08956	7.02736	7.11955	7.15232	7.1382	7.09674	7.10291	6.76094	6.75248	6.73263	6.65304	6.6862	6.91865	6.67832	6.72857	6.70965	6.6889	6.79444	6.70043
ILMN_1651470	7.18215	7.0857	7.00141	7.11291	7.06249	7.06474	7.03737	7.15174	7.16184	7.13061	6.72892	6.71054	6.82416	6.75958	6.71209	6.77188	6.82977	6.75925	6.7938	6.69553	6.74776	6.71793
ILMN_1651477	7.1042	7.09467	7.00141	7.06474	7.01894	7.13759	7.05986	6.98847	7.11366	7.009	6.58139	6.58452	6.59167	6.58938	6.52866	6.53947	6.65672	6.60155	6.64434	6.61775	6.60142	6.54835
ILMN_1651486	7.03737	7.11444	7.06249	7.08956	7.08068	7.1289	7.02736	7.02528	7.12163	7.09154	6.83767	6.75553	6.6973	6.71882	6.80086	6.71519	6.76308	6.72978	6.83597	6.78264	6.59277	6.71793
ILMN_1651488	7.09753	7.0857	7.17383	7.1042	7.18215	7.09276	7.08068	7.15174	7.11366	7.14066	6.59915	6.65799	6.62517	6.70131	6.60406	6.66063	6.75248	6.67799	6.67595	6.61536	6.61775	6.70043
ILMN_1651490	7.18215	7.12436	7.10231	7.17642	7.09529	7.18952	7.10231	7.28257	7.09674	7.27394	6.92007	7.11276	7.01296	6.99887	7.89253	6.89742	7.07905	7.31346	7.37007	7.32937	7.07527	7.30175
ILMN_1651492	7.20528	7.13293	7.08192	7.05656	7.19138	7.15344	7.18215	7.18634	7.12163	7.17141	6.82105	7.04504	6.91062	6.76171	7.16898	7.2782	6.99129	6.83857	6.85273	7.00641	6.85245	6.96784
ILMN_1651495	7.09753	7.13293	7.13008	7.04793	7.08876	7.09276	7.01743	7.17383	7.12163	7.19299	6.82225	6.87142	6.75224	6.75176	6.60896	6.59105	6.67832	6.62664	6.67887	6.75142	6.68848	6.70365
ILMN_1651496	7.29942	7.47658	7.31536	7.28583	7.37614	7.11955	7.07018	7.26357	7.27602	7.23584	7.13619	6.89199	7.30317	6.88897	6.78691	6.98302	7.09783	7.23979	7.06474	7.01784	7.04169	7.19277
ILMN_1651498	7.16819	7.18835	7.21794	7.18952	7.23472	7.61159	7.32783	7.40157	7.23522	7.13061	6.83475	6.70376	6.68507	6.77769	6.78566	7.13049	6.79165	6.77778	7.00558	6.74548	6.95124	6.59266
ILMN_1651499	7.20005	7.09467	7.09154	7.18952	7.16965	7.1804	6.99577	7.07099	7.12163	7.13061	6.86543	6.82569	6.73521	6.82579	6.8332	6.79712	6.71672	6.75669	6.81864	6.74647	7.01898	6.85789
ILMN_1651501	7.22877	7.15232	7.14838	7.20684	7.26903	7.24685	7.29776	7.17383	7.15344	7.2042	6.69751	6.79121	6.80407	6.71772	6.72111	6.8127	6.89265	6.80502	6.77063	6.8127	6.82622	6.71793
ILMN_1651504	7.50031	7.66493	7.70163	7.59405	7.61871	7.77268	7.62582	7.40157	7.63281	7.48756	7.37071	7.18658	7.39223	7.25117	7.34236	7.6559	7.42958	7.38359	7.36877	7.24223	7.32278	7.64305
ILMN_1651506	7.29482	7.28789	7.22762	7.18215	7.23982	7.1289	7.20347	7.28257	7.16184	7.60704	6.73501	6.84824	6.86176	6.79005	6.81435	6.9086	6.96619	6.80758	6.89577	6.79631	6.77315	6.90125
ILMN_1651507	7.3295	7.3484	7.36582	7.53711	7.34183	7.70372	7.38553	7.75239	7.22364	7.24861	7.4498	7.0521	7.08318	7.25715	7.56103	7.37912	7.18726	7.29484	7.28323	6.86633	7.58074	6.70043
ILMN_1651508	7.20005	7.11444	7.17383	7.16257	7.1289	7.13759	7.15232	7.17383	7.07988	7.009	6.77546	6.7385	6.81589	6.74776	6.81049	6.70821	6.83767	6.8332	6.74905	6.7636	6.78367	6.87518
ILMN_1651513	7.86862	8.00612	7.79538	7.86521	7.76525	7.36061	7.68083	7.34183	7.78482	7.39106	6.84301	6.71352	6.86176	6.95623	6.88	6.78705	6.75516	6.91885	6.85373	6.86633	6.86777	6.98484
ILMN_1651520	7.24685	7.09467	7.23522	7.16965	7.15344	7.15344	7.19299	7.11444	7.14512	7.16257	6.69394	6.66099	6.73032	6.68238	6.61871	6.71254	6.68341	6.69809	6.72353	6.66089	6.67731	6.79995
ILMN_1651532	7.09753	7.06611	7.11222	7.1042	7.05493	7.07347	7.14254	7.05986	7.17642	7.009	6.6889	6.84357	6.81456	6.75048	6.99534	6.74658	6.79871	6.74151	6.66926	6.73096	6.78841	6.82733
ILMN_1651535	7.1042	6.97359	7.08192	7.11291	7.1042	7.10291	7.11291	7.1289	7.07988	7.10291	6.78806	6.71352	6.70222	6.83969	6.75776	6.79712	6.59818	6.72605	6.65418	6.73096	6.77441	6.6889
ILMN_1651536	7.07224	7.0268	7.18215	7.1042	7.1446	7.01894	7.18215	7.00141	7.00726	7.009	6.75752	6.65936	6.69596	6.77432	6.69916	6.71519	6.8164	6.75669	6.60539	6.71489	6.78367	6.75238
ILMN_1651538	7.13008	7.1042	7.11222	7.11291	7.04582	7.10291	7.02736	7.08192	7.02617	7.06122	6.66683	6.65936	6.82632	6.7938	6.79111	6.64807	6.89265	6.75187	6.87636	6.74419	6.66543	6.74419
ILMN_1651543	6.99878	7.0762	7.15746	7.07224	7.15344	7.10291	7.14254	7.24582	7.04526	7.10291	6.73023	6.63807	6.54994	6.78806	6.85154	6.66778	6.60386	6.76426	6.79111	6.67762	6.73542	6.43325
ILMN_1651544	7.27602	7.25686	7.20062	7.27602	7.28375	7.11955	7.22527	7.15174	7.32482	7.27394	6.9552	6.73555	6.97428	7.09061	6.7416	6.83161	6.77675	6.83058	6.90542	6.97287	6.86166	6.63236
ILMN_1651547	7.02736	7.16965	7.13989	7.08192	7.00077	7.02807	7.17273	7.03675	7.03531	7.09154	6.55925	6.69241	6.59167	6.74548	6.61573	6.70243	6.5358	6.61883	6.57114	6.74548	6.65534	6.55416
ILMN_1651554	7.1446	7.17898	7.19138	7.24039	7.11291	7.1804	7.11291	7.07099	7.16184	7.15232	6.75099	6.8418	6.78756	6.73685	6.73123	6.77602	6.73836	6.84733	6.77675	6.80831	6.71075	6.77992
ILMN_1651557	7.09753	7.2135	7.30054	7.2193	7.19888	7.22762	7.16257	7.15174	7.2042	6.99878	6.89725	6.74441	6.77652	6.84612	6.70198	6.79424	6.80559	6.80224	6.81731	6.83221	6.78052	6.72243
ILMN_1651563	7.1042	7.0857	7.09154	7.20171	7.1382	7.13759	7.07018	7.1289	7.09674	7.14066	6.54969	6.59891	6.52122	6.61431	6.61431	6.63247	6.56809	6.63139	6.54861	6.57491	6.59444	6.65672
ILMN_1651565	7.1382	7.0857	7.13989	7.2193	7.1289	7.1804	7.10231	7.09337	7.11366	7.11291	6.76778	6.93482	6.76669	6.71396	6.82428	6.64923	6.81772	6.64902	6.72353	6.82377	6.96636	6.86505
ILMN_1651567	7.07224	7.05656	7.12074	7.16257	7.1289	7.11222	7.07018	7.03675	7.16184	7.09154	6.67371	6.75553	6.65281	6.76426	6.7883	6.60571	6.75248	6.70211	6.76308	6.8567	6.77642	6.88274
ILMN_1651568	7.01743	7.13293	7.12074	6.99798	6.9723	7.11222	7.07018	7.03675	7.09674	7.06122	6.77652	6.76797	6.68879	6.7416	6.81937	6.69024	6.67957	6.64317	6.83171	6.80717	6.53399	7.10458
ILMN_1651569	7.12163	7.09467	7.23522	7.15431	7.18215	7.06474	7.15232	7.15174	7.1975	7.14066	6.69158	6.66248	6.91148	6.69261	6.76669	6.79279	6.95011	6.85481	6.79601	6.86376	6.80045	6.75712
ILMN_1651574	7.05493	7.12436	7.08192	7.02373	6.93212	7.16257	7.09031	6.98847	7.02617	7.05001	6.66189	6.6889	6.67989	6.69385	6.54234	6.79279	6.75248	6.59362	6.65281	6.59362	6.62356	6.75238
ILMN_1651576	7.09031	7.12436	7.13989	7.07224	7.08876	7.05656	7.12163	7.09337	7.12163	7.09154	6.63129	6.78032	6.78861	6.7687	6.65672	6.80115	6.71186	6.7429	6.5639	6.66341	6.80446	6.61752
ILMN_1651582	7.19385	7.1042	7.07224	7.05656	6.9723	7.20684	7.18215	7.08192	7.11366	7.06122	6.55516	6.76797	6.70345	6.72978	6.71873	6.61051	6.67062	6.67291	6.68316	6.66889	6.71075	6.63738
ILMN_1651584	7.06249	7.14313	7.11222	7.15431	7.16125	7.04793	7.13061	7.2135	7.05266	7.12163	6.63984	6.61431	6.65028	6.67094	6.69916	6.73861	6.66572	6.65281	6.71396	6.70478	6.73371	6.76448
ILMN_1651597	7.21211	7.0268	7.09154	7.14254	7.07099	7.0109	7.02736	7.15174	7.1042	7.14066	6.6679	6.71508	6.87124	6.73371	6.73401	6.61611	6.62481	6.67799	6.64563	6.6045	6.63689	6.71793
ILMN_1651599	7.1042	7.05656	7.08192	7.08956	7.17642	7.04793	7.12163	7.00141	7.02617	7.09154	6.69886	6.71824	6.57749	6.76171	6.71489	6.71925	6.74905	6.75925	6.69271	6.68269	6.83756	6.80304
ILMN_1651604	7.03737	7.0268	7.00141	7.07224	7.09529	7.00197	7.05986	7.00141	6.98847	7.009	6.85481	6.70376	6.83306	6.74658	6.59719	6.69564	6.67832	6.64317	6.91079	6.62968	6.74627	6.56955
ILMN_1651606	7.09031	7.11444	7.12074	7.09529	7.08068	7.17141	7.11291	7.2135	7.28789	7.23584	6.76955	6.80025	6.82274	6.72616	6.64827	6.76925	6.70942	6.72715	6.63259	6.71741	6.61611	6.78986
ILMN_1651608	7.05493	7.16125	7.16498	7.13476	7.1042	7.16257	7.13061	7.11444	7.07099	7.18215	6.76669	6.69405	6.80861	6.71772	6.87536	6.69997	6.7586	6.78996	6.72892	6.54333	6.65926	6.72443
ILMN_1651609	7.1042	7.1042	7.04304	7.11291	7.07099	7.11222	7.05986	7.1042	7.07099	7.09154	6.71824	6.81147	6.8794	6.75958	6.88136	6.84602	6.95124	6.62366	6.82428	6.96462	6.76105	6.86954
ILMN_1651610	7.06249	7.09467	7.10231	7.15098	7.24582	7.32783	7.26855	7.2135	7.11366	7.18215	6.874	6.93303	6.80407	6.74919	6.83067	6.75624	6.78483	6.7324	6.69014	6.70965	6.79279	6.88274
ILMN_1651617	7.05493	7.00578	7.04304	7.08956	7.1446	7.11222	7.12163	7.04731	7.13872	7.05001	6.6889	6.60083	6.7583	6.71641	6.61573	6.8246	6.69024	6.67799	6.6722	6.62058	6.79881	6.80304
ILMN_1651624	7.1042	7.0762	7.11222	7.15431	7.04582	7.08253	7.18215	7.20005	7.13872	7.16257	6.73836	6.57905	6.91062	6.73576	6.77915	6.77895	6.73479	6.76053	6.8208	6.84401	6.84189	6.8127
ILMN_1651628	7.80041	7.82206	7.68118	7.81126	7.57069	7.46409	7.68932	7.5493	7.72176	7.5053	7.43643	7.51246	7.52364	7.62813	6.99667	7.14885	7.52073	7.15299	7.25543	7.53607	7.27675	7.11583
ILMN_1651636	6.97138	7.0168	7.10231	7.11291	7.12074	7.1446	7.13061	7.09337	7.12163	7.05001	6.77315	6.7429	6.83189	6.65304	6.70942	6.56533	6.87377	6.72353	6.88382	6.88009	6.71396	6.66558
ILMN_1651637	7.15292	7.12436	7.17383	7.12074	7.12074	7.1804	7.18215	7.02528	7.16965	7.08192	6.74419	6.89808	6.75325	6.69024	6.75034	6.81835	6.79529	6.7844	6.77675	6.71086	6.69158	6.84142
ILMN_1651641	7.12163	7.18835	7.07224	7.12074	7.1382	7.06474	7.11291	7.03675	7.18215	7.09154	6.59444	6.68394	6.76552	6.75176	6.7553	6.73491	6.7619	6.72353	6.63538	6.68765	6.69158	6.6723
ILMN_1651642	7.1446	7.16965	7.18215	7.15098	7.00822	7.22762	7.00642	7.09337	7.1042	7.2042	6.84733	6.97347	6.76807	6.87988	6.80189	6.77452	6.78362	6.92926	6.77305	6.83331	6.77315	6.89671
ILMN_1651643	7.01743	7.13293	7.03236	7.06474	7.07099	7.03737	7.10231	7.03675	7.02617	7.23584	6.80086	6.69405	6.89111	6.74419	6.8726	6.79995	6.92633	6.70211	6.71925	6.8312	6.75229	6.65824
ILMN_1651652	7.16073	7.22762	7.18215	7.16965	7.17642	7.1446	7.14254	7.17383	7.16184	7.14066	6.81589	6.86474	6.78861	6.9069	6.82705	6.79121	6.71925	6.79601	6.78483	7.14885	6.78221	6.67387
ILMN_1651656	7.06249	7.11444	7.19138	7.03095	7.12074	7.09276	7.12163	7.20005	7.02617	6.99878	6.65418	6.80655	6.62272	6.71519	6.81937	6.79424	6.64923	6.67799	6.7618	6.83767	6.65237	6.64679
ILMN_1651657	7.15292	7.16125	7.12074	7.18215	7.08876	7.11955	7.09031	7.24582	7.1975	7.18215	6.89023	6.95309	6.79444	6.76665	6.88762	6.73741	6.84914	6.80224	6.78986	6.86108	6.81589	6.91904
ILMN_1651660	7.11366	7.06611	7.02231	7.1289	7.08068	7.07347	6.94661	7.04731	7.09674	7.009	6.7163	6.76797	7.08184	6.75048	6.69126	6.73204	6.67291	6.7844	6.76308	6.62564	6.71559	6.62529
ILMN_1651662	7.04582	7.09467	7.03236	7.038	7.12074	6.97138	7.18215	7.1382	7.08956	7.13061	6.66063	6.85144	6.68372	6.81375	6.87846	6.84152	6.80559	6.67924	6.52133	6.75681	6.80879	6.70365
ILMN_1651664	7.09031	7.0762	7.03236	7.05656	7.08068	7.08253	7.07018	6.97808	7.05266	7.05001	6.62989	6.73555	6.61026	6.82579	6.80086	6.48117	6.68454	6.64902	6.79111	6.83331	6.75806	6.66008
ILMN_1651672	7.08068	7.20471	7.08192	7.06474	7.03737	7.22762	7.00642	7.1289	7.12163	7.17141	6.7429	6.7429	6.74031	6.73685	6.83969	6.73741	6.8164	6.7938	6.76053	6.75142	6.83909	6.82885
ILMN_1651680	14.483	14.375	14.4937	14.2292	13.9959	13.3695	14.2976	14.4204	14.3684	14.0877	14.1902	14.2685	14.0944	14.2685	14.2896	14.1902	14.1727	14.1727	14.0309	14.2685	14.0115	14.0365
ILMN_1651681	7.01743	7.13293	7.14838	7.038	7.00822	7.16257	7.03737	7.1289	7.09674	7.09154	6.73706	6.59891	6.69843	6.64519	6.74537	6.65523	6.57481	6.69061	6.70842	6.55239	6.71741	6.77213
ILMN_1651684	7.3295	7.25686	7.17383	7.16257	7.23982	7.1289	7.20347	7.1042	7.19024	7.22527	6.83857	6.90192	7.02309	6.9026	6.83969	6.87859	6.8555	6.68166	6.891	6.87506	6.831	6.92633
ILMN_1651685	7.20005	7.12436	7.17383	7.16965	7.17642	7.09276	7.24685	7.22877	7.11366	7.15232	6.68418	6.73706	6.71904	6.8087	6.73662	6.8154	6.77915	6.80502	6.78756	6.83767	6.81589	6.8382
ILMN_1651690	7.05493	7.22762	7.05129	7.15431	7.00822	7.10291	7.10231	7.15174	7.15344	7.11291	6.75099	6.71508	6.7608	6.67246	6.66303	6.63387	6.79871	6.71065	6.7618	6.65418	6.69271	6.7587
ILMN_1651692	8.69451	9.01892	8.7061	8.45631	8.53038	9.614	9.16762	9.11338	8.5719	9.09988	9.15809	9.25185	9.07548	9.0258	9.99839	9.62732	8.52694	8.72328	8.78671	8.60278	8.7264	9.47651
ILMN_1651693	7.09031	7.0857	7.12074	7.07224	7.19138	7.1289	7.15232	7.1382	7.09674	7.17141	6.79756	6.7198	6.85024	6.77537	6.93313	6.76298	6.73605	6.89875	6.69923	6.88371	6.89236	6.84559
ILMN_1651699	7.07224	7.2135	7.13989	7.16257	7.2135	7.03737	7.05986	7.20005	7.27602	7.16257	6.63738	6.6889	6.6722	6.68765	6.72364	6.69405	6.65672	6.75669	6.68735	6.67523	6.65926	6.65511
ILMN_1651705	10.8477	11.2206	11.1449	11.1211	10.5115	8.49323	11.0248	9.10874	11.0042	9.04197	10.5657	10.8016	10.7965	10.7014	9.36345	8.99055	10.3858	9.35437	10.6327	10.8986	10.4356	9.86643
ILMN_1651708	7.09031	7.00578	6.99048	7.20171	7.1289	7.09276	7.07018	7.17383	7.02617	7.08192	6.81492	6.79121	6.7165	6.84031	6.77915	6.71641	6.80446	6.83058	6.81147	6.73096	6.71741	6.80717
ILMN_1651710	7.13008	7.0762	7.23522	7.17642	7.12074	7.25796	7.00642	7.24582	7.17642	7.19299	6.70355	6.79121	6.90076	6.71519	6.85997	6.70821	6.72747	6.628	6.76669	6.70842	6.79881	6.77072
ILMN_1651711	7.07224	7.15232	7.01218	7.01434	7.1382	7.07347	7.09031	7.1042	7.05266	7.09154	6.63984	6.71508	6.65028	6.76533	6.50932	6.697	6.58938	6.54918	6.68735	6.48695	6.662	6.65672
ILMN_1651712	7.09031	7.0857	7.11222	7.26903	7.15344	7.21794	7.11291	7.11444	7.21794	7.22527	6.75414	6.66248	6.82733	6.71519	6.79472	6.71925	6.78264	6.70066	6.91666	6.73576	6.64902	6.60873
ILMN_1651715	7.07224	7.12436	7.23522	7.038	7.04582	7.04793	7.02736	7.07099	7.26406	7.009	6.82105	6.82569	6.67356	6.84152	6.66406	6.80856	6.77796	6.84243	6.92461	6.83462	6.74905	6.76637
ILMN_1651717	7.01743	7.12436	7.20062	7.15431	7.01894	7.11955	7.00642	7.00141	6.95782	7.08192	6.65799	6.74021	6.72605	6.67617	6.71075	6.68361	6.82447	6.58805	6.6234	6.7616	6.8246	6.56955
ILMN_1651719	8.82703	9.4537	9.71227	9.45816	9.72127	10.0781	9.79524	9.72576	9.56727	9.97754	9.16257	8.95707	9.26576	9.2526	8.71536	9.5253	8.89293	9.1537	9.11739	9.39107	9.15809	9.38956
ILMN_1651727	7.05493	7.00578	7.05129	7.05656	7.06249	7.06474	7.03737	7.01218	7.02617	7.15232	6.74892	6.71824	6.60406	6.68124	6.71606	6.68361	6.80348	6.56145	6.52674	6.64063	6.65723	6.71489
ILMN_1651735	10.7054	10.4818	10.473	10.4869	10.1822	10.1744	10.2972	10.7624	10.2662	10.4132	10.4646	11.2726	10.6906	10.6209	10.7531	10.9192	10.885	11.0529	11.1557	10.8179	10.9665	10.8065
ILMN_1651737	7.08068	7.1042	7.06249	7.18215	7.18215	7.11955	7.15232	7.09337	7.15344	7.13061	6.7429	6.78168	6.70345	6.64658	6.70821	6.67606	6.79871	6.7844	6.77305	6.59047	6.77915	6.68389
ILMN_1651741	7.18215	7.0762	7.03236	7.14254	7.11291	7.20684	7.14254	7.1382	7.07099	7.08192	6.63376	6.74441	6.63139	6.69385	6.78294	6.69843	6.64015	6.75414	6.73123	6.7197	6.64902	6.75238
ILMN_1651745	7.1042	7.11444	7.11222	7.12074	7.26406	7.21794	7.10231	7.09337	7.1975	7.16257	6.81384	6.83667	6.95299	6.89884	6.88613	6.80407	6.85661	6.77183	6.86157	6.78362	6.80313	6.83484
ILMN_1651752	7.16819	7.25686	7.05129	7.1289	7.06249	7.07347	7.13061	7.1382	7.13008	7.17141	6.70355	6.86139	6.81107	6.77072	6.77915	6.67606	6.7324	6.63046	6.75259	6.66742	6.78705	6.93482
ILMN_1651758	7.16073	7.0857	7.12074	7.01434	7.18215	6.99048	7.11291	7.1042	6.98011	7.02964	6.62757	6.7776	6.72605	6.60024	6.70043	6.5168	6.73605	6.82335	6.61871	6.66089	6.71075	6.639
ILMN_1651760	7.1382	7.16965	7.07224	7.16257	7.19888	7.08253	7.17273	7.11444	7.22364	7.2983	6.81492	6.76955	6.72605	6.66719	6.92273	6.7039	6.59662	6.76053	6.978	6.55109	6.80045	6.73371
ILMN_1651763	7.19385	7.0762	7.08192	7.1289	7.1382	7.19888	7.16257	7.1289	7.18215	7.18215	6.82947	6.63506	6.7429	6.81578	6.80541	6.74419	6.70942	6.78806	6.86713	6.70965	6.7416	6.69564
ILMN_1651767	8.24678	9.05017	8.65043	8.58853	8.66024	8.8091	8.6362	8.70719	8.3585	8.70312	8.78709	8.45793	8.65055	9.20467	8.51809	9.16774	8.0912	8.10554	8.3225	8.23286	7.99765	8.61071
ILMN_1651769	7.57993	7.55439	7.46331	7.38362	7.4998	7.26664	7.45378	7.2135	7.52025	7.31076	6.93482	6.90402	6.97305	7.0169	7.16157	6.83453	7.03517	6.84353	7.0166	6.99705	6.86334	6.89848
ILMN_1651771	7.00822	7.0168	7.10231	7.01434	7.06249	7.23667	7.03737	7.08192	7.01607	7.02964	6.69631	6.63506	6.7608	6.77895	6.70942	6.7039	6.73371	6.68937	6.69405	6.57749	6.72343	6.7416
ILMN_1651776	8.57966	9.29706	9.00502	8.86237	9.29267	10.7618	9.17501	9.4756	8.94765	10.0144	8.99693	8.40714	8.64448	9.28935	9.75593	10.6961	9.02174	9.26204	9.42996	9.08475	9.63451	9.09089
ILMN_1651787	7.29482	7.11444	7.16498	7.22998	7.24582	7.13759	7.17273	7.18634	7.23522	7.46976	6.95983	6.72147	6.81835	6.87714	6.77188	6.88442	6.95529	6.99295	6.7938	6.97975	6.88673	6.91904
ILMN_1651788	8.65533	9.0022	8.98067	8.63269	9.2532	9.23303	9.17501	8.66521	8.85401	9.19399	9.7143	8.8348	9.11694	9.65917	9.02982	9.50316	8.81316	8.47756	8.88164	9.40763	8.80043	9.4409
ILMN_1651789	7.05493	7.0857	7.01218	7.06474	7.1042	6.96389	7.15232	7.1042	7.02617	7.2135	6.76778	6.69036	6.69126	6.79121	6.72111	6.64144	6.67595	6.71681	6.75414	6.73346	6.662	6.58151
ILMN_1651792	7.11366	7.11444	7.05129	7.05656	7.06249	7.08253	7.14254	7.05986	7.13008	7.18215	6.82105	6.7416	6.73391	6.76955	6.89742	6.7587	6.76308	6.68166	6.75925	6.60742	6.75229	6.84708
ILMN_1651799	8.08272	8.03504	8.07532	8.30131	8.04088	8.57531	8.09314	8.3528	8.19283	8.41391	6.73576	6.70222	6.82632	6.73911	6.81795	6.7587	6.7619	6.70821	6.89307	6.99598	6.7668	7.11129
ILMN_1651800	7.00822	7.17898	7.2116	7.40157	7.23982	7.21794	7.17273	7.1382	7.28103	7.33662	6.77938	6.76955	6.77296	6.87133	6.73802	6.8288	7.03586	6.80502	6.90416	6.79215	6.92646	7.1139
ILMN_1651806	7.00822	7.0268	7.02231	7.15431	6.99048	7.02807	7.07018	6.98847	6.9495	7.15232	6.59915	6.63807	6.59433	6.5323	6.4387	6.46978	6.60264	6.53484	6.55975	6.57221	6.63689	6.64495
ILMN_1651811	7.07224	7.16965	7.07224	7.14254	7.04582	7.04793	7.15232	7.02528	7.07988	7.13061	6.7324	6.71824	6.69843	6.73685	6.76298	6.76533	6.72892	6.88331	6.78986	6.6889	6.62356	6.77072
ILMN_1651817	7.11366	7.0268	7.01218	7.08956	7.05493	7.1289	7.04793	7.08192	7.11366	7.09154	6.83857	6.84824	6.72343	6.84152	6.76298	6.65385	6.7405	6.76171	6.73642	6.73226	6.78545	6.77675
ILMN_1651819	8.03543	7.98476	8.22413	8.0924	8.2084	7.66983	7.92304	8.07581	8.07861	7.97125	8.04438	8.22706	7.88734	8.02233	7.69917	7.94223	8.13778	7.67842	8.07658	8.05651	8.18207	7.8222
ILMN_1651826	10.8584	10.5314	10.4348	11.2465	10.8928	9.69952	10.3784	9.22537	10.4852	9.61407	10.6906	11.228	10.8313	11.0212	11.5782	9.88136	9.81058	9.9683	10.9285	10.8953	10.4571	10.8684
ILMN_1651828	7.31478	7.37027	7.28583	7.26229	7.32482	7.11222	7.4114	7.09337	7.33563	7.2135	7.27653	6.93874	7.11668	7.10578	7.04122	6.88897	7.28663	7.06467	7.00363	7.16567	7.09105	6.68735
ILMN_1651832	9.96045	9.84206	9.81313	9.92121	10.2057	10.5242	10.1909	10.7994	9.99521	10.8201	9.51283	10.6201	10.3961	9.54913	11.2558	11.228	10.5816	11.0774	10.8953	10.5	10.8295	10.5651
ILMN_1651838	7.09753	7.11444	7.17383	7.15098	7.12074	7.03737	7.11291	7.20005	7.09674	7.05001	6.66572	6.76317	6.80407	6.76764	6.67947	6.84713	6.84152	6.76542	6.87419	6.74063	6.72485	6.7416
ILMN_1651846	7.12163	7.15232	7.11222	7.03095	7.00077	7.01894	7.10231	7.02528	7.1042	7.10291	6.7196	6.80313	6.69484	6.77652	6.7324	6.69564	6.76669	6.63139	6.69405	6.87574	6.68044	6.6307
ILMN_1651848	7.08068	7.11444	7.04304	7.1042	7.08068	7.20684	7.12163	7.05986	7.01607	7.14066	6.78691	6.78358	6.83736	6.75259	6.8464	6.76925	6.72045	6.66636	6.71396	6.76828	6.68206	6.86079
ILMN_1651850	13.5706	13.5495	13.5911	13.6092	13.4106	13.7115	13.7706	13.6092	13.5581	13.4735	13.4849	13.5903	13.5136	13.5136	13.3551	13.3944	13.5721	13.4517	13.3289	13.493	13.5903	13.4517
ILMN_1651865	7.05493	6.98544	7.11222	7.038	7.03737	7.08253	7.13061	7.1042	7.15344	7.05001	6.77938	6.75414	6.66493	6.72978	6.72762	6.79569	6.64679	6.63046	6.72892	6.7071	6.60742	6.71154
ILMN_1651872	7.52025	7.53154	7.38668	7.46795	7.48419	7.37027	7.47899	7.28257	7.76095	7.53982	7.59035	7.2134	7.42975	7.33074	7.22776	7.24861	7.74291	7.36467	7.64207	7.55382	7.64392	7.18709
ILMN_1651878	7.16073	7.09467	7.10231	7.1042	7.11291	7.1289	7.07018	7.1042	7.11366	7.14066	6.82009	6.71352	6.76807	6.84501	6.71209	6.77315	6.84824	6.80879	6.77432	6.92494	6.64701	6.67595
ILMN_1651886	9.85494	9.8291	9.79452	9.80155	9.57689	9.69563	9.78801	9.81889	9.65008	9.66995	9.41226	9.37549	9.51111	9.40728	9.85332	9.52034	9.54546	9.90808	9.25185	9.27979	9.37808	9.50485
ILMN_1651899	12.8693	12.9343	13.1372	12.8151	13.066	12.8828	12.9013	13.0538	12.7277	12.7239	12.6788	11.7175	11.9384	12.4772	11.9951	11.4265	11.7083	12.2834	11.9436	12.3468	11.8921	12.2416
ILMN_1651900	7.1446	7.06611	7.11222	7.08956	7.1446	7.06474	7.13061	7.01218	7.05266	7.11291	6.79444	6.67575	6.72004	6.70912	6.83857	6.84152	6.68454	6.85481	6.63259	6.61775	6.7703	6.73226
ILMN_1651902	7.16819	7.13293	7.19138	7.2193	7.16965	7.09276	7.16257	7.08192	7.22364	7.09154	6.96371	6.87859	7.09323	6.77652	6.59719	6.76925	6.77796	6.82846	6.75414	6.92679	6.89701	6.60285
ILMN_1651903	7.13008	7.16965	7.06249	7.04793	7.16965	7.1289	7.14254	7.22877	7.09674	7.15232	6.65418	6.78358	6.6603	6.90746	6.77915	6.73605	6.7608	6.71813	6.72485	6.7185	6.80758	6.79404
ILMN_1651905	7.05493	7.13293	7.03236	7.1042	7.04582	7.11955	7.01743	7.1289	7.07988	7.18215	6.874	6.82714	6.73391	6.82977	6.75776	6.91006	6.7416	6.67799	6.83969	6.67002	6.85245	6.79111
ILMN_1651913	7.13008	7.03737	7.15746	7.038	7.09529	7.10291	7.04793	7.05986	7.09674	7.18215	6.69271	6.66594	6.75224	6.59468	6.64993	6.71793	6.65799	6.65936	6.74647	6.64495	6.61611	6.59111
ILMN_1651916	7.04582	7.16125	7.2116	7.08956	7.1042	7.01894	7.02736	7.03675	7.1042	7.09154	6.73706	6.71661	6.68238	6.72364	6.78168	6.62176	6.82554	6.76426	6.68869	6.70965	6.76415	6.68226
ILMN_1651936	7.51629	7.47658	7.641	7.54125	7.58741	8.54703	7.70581	8.55753	7.47748	8.10274	7.38521	7.17449	7.2893	7.14729	8.13683	8.04381	7.53317	8.1324	7.74739	7.53829	7.65795	7.76825
ILMN_1651938	7.1382	7.03737	7.05129	7.06474	7.12074	7.05656	7.13061	7.04731	7.17642	7.2042	6.76094	6.83667	6.71065	6.70243	6.79472	6.74419	6.79529	6.71186	6.75048	6.68044	6.74301	6.86079
ILMN_1651940	7.04582	7.09467	6.9406	7.09529	7.02736	7.13759	7.12163	7.04731	7.04526	7.05001	6.67051	6.6565	6.83493	6.77537	6.68745	6.66926	6.57102	6.75048	6.72045	6.60331	6.831	6.66558
ILMN_1651943	7.03737	7.22762	7.12074	7.16257	7.00822	7.10291	7.25796	7.1382	7.07988	7.05001	6.75752	6.72631	6.86759	6.75516	6.81795	6.89884	6.89265	6.65936	6.87358	6.69821	6.73371	6.86218
ILMN_1651944	7.02736	7.03737	7.08192	7.01434	7.06249	7.21794	7.13061	7.08192	6.98011	7.16257	6.78052	6.7776	6.96756	6.84319	6.62356	6.77602	6.82447	6.74399	6.70355	6.73226	6.82947	6.73371
ILMN_1651949	7.29482	7.3484	7.24582	7.25082	7.26903	7.1289	7.11291	7.07099	7.29221	7.08192	7.25072	6.88732	6.91651	7.01724	6.96631	6.84602	6.97573	6.65936	7.02304	6.89014	6.99581	7.19277
ILMN_1651950	7.22877	7.15232	7.08192	7.34647	7.1446	7.1804	7.20347	7.1042	7.23522	7.11291	6.84301	6.86966	6.59167	6.98828	7.8222	6.81967	6.689	6.72857	6.75925	6.72846	6.79279	6.8156
ILMN_1651958	7.18691	7.11444	7.16498	7.18215	7.20528	7.11955	7.12163	7.08192	7.22364	7.17141	6.90166	6.84357	6.74647	6.91148	6.90076	6.81835	6.76552	6.7938	6.7416	6.86986	6.77315	6.69886
ILMN_1651964	7.592	7.82738	7.65413	7.65294	7.71656	7.44914	7.83355	7.53298	7.89609	7.68083	7.13906	7.22068	7.22126	7.11968	6.91847	6.78986	7.1174	7.3008	7.23601	7.25919	7.21627	6.98327
ILMN_1651966	7.1446	7.09467	7.08192	7.26563	7.04582	7.13759	7.2135	7.16257	7.1042	7.18215	6.7553	6.63984	6.82875	6.75624	6.80407	6.77895	6.69158	6.75187	6.87033	6.79404	6.75229	6.64495
ILMN_1651967	7.21211	7.11444	7.13008	7.22527	7.16965	7.1446	7.14254	7.36061	7.25313	7.09154	6.96928	7.20725	6.84392	6.89176	7.17657	7.13635	6.89742	6.88974	6.86157	6.88655	6.81446	6.80975
ILMN_1651980	7.24039	7.21986	7.15746	7.19579	7.20528	7.27801	7.22527	7.22877	7.22364	7.2135	6.9063	6.76955	6.80407	6.65304	6.71741	6.79569	6.75516	6.83462	6.80545	6.85493	6.75669	6.75238
ILMN_1651984	7.00822	7.06611	7.18215	7.038	7.1382	7.1804	7.11291	7.02528	7.08956	7.09154	6.73023	6.61276	6.88019	6.65304	6.67312	6.74419	6.69751	6.64178	6.61752	6.73576	6.66719	6.65672
ILMN_1651987	7.51174	7.63392	7.72967	7.9074	7.7561	7.82163	7.62582	7.68967	7.64995	7.58035	7.65244	7.24317	7.56488	7.53056	7.37772	7.5781	7.76664	7.46042	7.86621	7.99867	7.7685	7.05473
ILMN_1652000	7.63704	7.92667	7.78661	7.72349	7.73777	7.16257	7.93488	7.90703	7.88453	7.2983	7.48442	7.73347	7.97358	7.60882	7.24698	7.29216	7.37896	7.55297	7.51241	7.31931	7.50947	7.46349
ILMN_1652003	7.36005	7.263	7.31536	7.33868	7.22706	7.32783	7.26855	7.30054	7.34062	7.36005	6.84501	6.74919	6.64668	6.68636	6.7324	6.70942	6.65074	6.76298	6.87255	6.72846	6.70089	6.8156
ILMN_1652006	7.28583	7.41889	7.59261	7.41757	7.4395	7.38597	7.39384	7.24582	7.37666	7.53065	7.24527	7.30962	7.3807	7.39943	7.24449	7.29216	7.27948	7.13768	7.47693	7.64022	7.50242	7.15678
ILMN_1652008	7.36005	7.34235	7.32319	7.44967	7.3639	7.17141	7.37666	7.09337	7.36582	7.15232	7.02901	6.84824	6.98575	7.18627	6.93604	6.80541	6.79995	6.75048	7.00917	7.01481	6.72932	6.92802
ILMN_1652015	7.09753	7.1042	7.15746	7.1289	7.08068	7.09276	7.14254	7.2135	7.12163	7.16257	6.6642	6.77432	6.62757	6.7583	6.71873	6.81681	6.9005	6.70066	6.83698	6.75776	6.7913	6.82592
ILMN_1652017	7.15292	7.17898	7.16498	7.12074	7.06249	7.07347	7.17273	7.05986	7.04526	7.12163	6.67947	6.74605	6.83189	6.81375	6.76426	6.73371	6.86286	6.71439	6.74776	6.90899	6.80879	6.69394
ILMN_1652022	7.1382	7.04731	7.03236	7.1042	7.04582	7.11222	7.01743	7.09337	7.07988	7.17141	6.83577	6.76955	6.64025	6.87811	6.65132	6.73204	6.75034	6.84612	6.68443	6.68765	6.7703	6.67062
ILMN_1652023	7.1042	7.19579	7.03236	7.1289	7.16965	6.99048	7.08068	7.1382	7.07099	7.19299	6.73706	6.73371	6.69261	6.78232	6.82705	6.77602	6.74419	6.7938	6.85941	6.72846	6.68361	6.74776
ILMN_1652024	7.62582	7.54148	7.58035	7.83394	7.57605	7.59373	7.7363	7.85782	7.78947	7.71719	7.19524	7.30063	7.20853	7.3136	7.24154	7.48566	7.38702	7.56549	7.58662	7.60142	7.40416	7.77626
ILMN_1652037	7.09753	7.11444	7.13008	7.15098	7.05493	7.04793	7.12163	7.11444	7.12163	7.08192	6.66926	6.7416	6.65799	6.80975	6.87693	6.60742	6.67291	6.74399	6.79111	6.88916	6.96077	6.85024
ILMN_1652056	7.16073	7.00578	6.969	7.13476	7.08876	7.16257	7.02736	7.07099	7.05266	7.08192	6.76094	6.74605	6.6603	6.67887	6.70423	6.7616	6.77222	6.7399	6.66926	6.66889	6.65723	6.784
ILMN_1652065	8.83777	9.06067	8.7061	8.62703	8.84571	8.8764	9.01112	8.78343	8.93819	8.66072	8.74861	9.12848	8.8046	8.97602	8.67896	9.68149	9.37097	8.53097	9.06607	8.2996	9.55963	8.09757
ILMN_1652066	7.03737	7.13293	7.08192	7.13476	7.05493	7.05656	7.08068	7.05986	7.07988	7.09154	6.71154	6.6448	6.54326	6.63748	6.5866	6.71793	6.72892	6.55493	6.69677	6.64646	6.60347	6.75238
ILMN_1652072	7.00822	7.09467	7.14838	7.11291	7.1042	7.11222	7.07018	7.09337	7.1042	7.06122	6.68664	6.70852	6.80014	6.66089	6.61752	6.86966	6.80935	6.74528	6.6979	6.72222	6.92234	6.70965
ILMN_1652073	10.0807	10.1236	10.3536	10.1286	10.0603	10.0096	9.90688	9.90096	10.0883	10.2513	8.0967	7.60623	7.28055	8.47365	7.96921	7.20079	7.56702	7.83028	7.95068	8.42181	8.06563	8.1727
ILMN_1652079	7.02736	7.0762	7.01218	7.09529	7.06249	6.99048	6.99577	7.1382	6.98011	7.11291	6.69271	6.82051	6.75702	6.76764	6.63153	6.97203	6.75752	6.67924	6.67356	6.64902	6.71559	6.7399
ILMN_1652081	7.07224	7.13293	7.08192	7.038	7.23472	7.17141	7.10231	7.09337	7.08956	7.2042	6.70089	6.78483	6.63772	6.71641	6.79472	6.67062	6.73836	6.68787	6.71133	6.68394	6.65723	6.70509
ILMN_1652082	9.55617	9.4756	9.29113	9.3389	9.15276	11.1742	9.49295	11.304	9.2302	11.0931	9.86098	10.6668	10.2612	9.91509	11.8705	12.1146	10.6941	11.9512	10.995	10.31	11.1557	11.6587
ILMN_1652085	8.54372	8.44783	8.08649	8.28133	8.30788	7.87623	8.33812	8.54458	8.34424	8.84144	8.39506	7.97725	7.92788	8.40816	8.44981	8.30788	8.64603	8.68005	8.58921	8.24336	8.32932	8.42905
ILMN_1652088	7.1446	7.13293	7.13008	7.03095	7.07099	7.13759	7.03737	7.04731	7.09674	7.09154	6.89817	6.72781	6.66946	6.68012	6.97809	6.7775	6.69886	6.67438	6.86474	6.79101	6.74021	6.89014
ILMN_1652098	7.06249	7.20471	7.17383	7.18215	7.17642	7.18952	7.11291	7.1289	7.13008	7.18215	6.70942	6.70078	6.82733	6.82009	6.61051	6.69024	6.60386	6.76426	6.558	6.70842	6.63689	6.8487
ILMN_1652104	7.15292	7.09467	7.03236	7.07224	7.1289	7.08253	7.11291	7.05986	7.1042	7.14066	6.70942	6.80502	6.64795	6.65556	6.66303	6.69997	6.87377	6.73651	6.87935	6.70089	6.66915	6.74776
ILMN_1652110	7.20005	7.09467	7.13989	7.2193	7.12074	7.09276	7.07018	7.1042	7.01607	6.98847	6.73123	6.65458	6.63645	6.78705	6.71209	6.70121	6.60509	6.71681	6.70053	6.72485	6.66543	6.70689
ILMN_1652113	7.1042	7.11444	7.09154	7.14254	7.1382	7.11955	7.26855	7.16257	7.19024	7.13061	6.73836	6.77432	6.7619	6.57943	6.7938	6.71519	6.7429	6.88469	6.69271	6.69024	6.81024	6.69024
ILMN_1652123	9.32409	8.83939	9.63395	9.23675	9.30318	8.59562	9.37975	9.24664	9.02356	9.13486	8.66675	8.43044	8.18772	8.79849	8.91001	9.13198	8.51786	9.12425	9.0571	9.03545	8.9268	9.08149
ILMN_1652128	9.76427	10.0664	9.86888	9.74911	9.89889	9.43838	9.65839	9.44225	10.0607	9.43884	9.63403	9.82089	9.44033	9.3552	9.98476	9.14856	9.24122	9.3145	9.27548	9.55095	9.35567	9.95095
ILMN_1652132	7.12163	7.0857	6.9495	7.06474	7.05493	7.03737	7.00642	7.08192	7.06122	7.01894	6.54835	6.76009	6.49877	6.53506	6.64712	6.80294	6.75034	6.63046	6.62166	6.62176	6.68848	7.02012
ILMN_1652137	7.24685	7.06611	7.08192	7.06474	7.1042	7.11955	7.09031	7.05986	7.09674	7.05001	6.74892	6.67731	6.75088	6.68238	6.8438	6.7416	6.7416	6.90336	6.65936	6.66216	6.73542	6.77823
ILMN_1652144	7.05493	7.13293	7.16498	7.04793	7.1289	7.04793	7.07018	7.45315	7.11366	7.12163	6.80955	6.77129	6.78515	6.63469	6.91704	6.82098	6.85134	6.78555	6.75787	6.98908	6.81891	6.76171
ILMN_1652147	7.29942	7.17898	7.27849	7.27967	7.2135	7.16257	7.18215	7.15174	7.19024	7.2042	6.94993	6.81147	6.90528	6.99304	6.76669	6.89469	7.01845	7.0202	6.74279	6.87574	6.92385	6.79539
ILMN_1652151	7.11366	7.0762	7.01218	7.08192	7.08876	7.06474	7.12163	7.05986	7.05266	7.16257	6.62859	6.57201	6.80646	6.69618	6.57481	6.63538	6.57481	6.62517	6.64434	6.58503	6.68044	6.65166
ILMN_1652155	7.05493	7.06611	7.13008	7.19579	7.1042	7.1446	7.10231	7.18634	7.04526	7.11291	6.64113	6.61775	6.68113	6.75624	6.74647	6.75752	6.58805	6.80377	6.70965	6.67762	6.69463	6.64123
ILMN_1652160	7.18691	7.16965	7.13008	7.2135	7.09529	7.22762	7.14254	7.05986	7.13872	7.27394	6.7429	6.77895	6.82977	6.75048	6.79246	6.77452	6.83857	6.68664	6.74279	6.90566	6.78545	6.86954
ILMN_1652161	7.22364	7.14313	7.35235	7.34183	7.25796	7.25796	7.35822	7.66054	7.22364	7.32319	6.95631	6.84824	6.89537	6.83067	7.13233	7.06762	7.00396	7.04623	6.85941	7.15017	6.96077	7.15333
ILMN_1652163	7.5053	7.48756	7.48983	7.44676	7.55105	7.7948	7.51248	7.60866	7.49821	7.59793	7.26307	7.15805	7.24729	7.28081	6.89742	7.23399	7.24252	7.3959	7.32531	7.23307	7.44798	7.26382
ILMN_1652164	7.39106	7.51409	7.59261	7.40422	7.62644	7.1289	7.56629	7.40157	7.47199	7.15232	7.25452	7.3892	7.66385	7.22256	7.56729	7.53493	7.36686	6.91406	7.29984	7.26933	7.42903	7.97273
ILMN_1652166	7.16073	6.98544	7.13008	7.15431	7.19138	7.1289	7.26855	7.1382	7.09674	7.11291	6.72781	6.73096	6.78628	6.66594	6.87133	6.68361	6.78149	6.75925	6.91455	6.68652	6.69618	6.6723
ILMN_1652170	7.18215	7.21986	7.08192	7.09529	7.16965	7.1804	7.25796	7.17383	7.16184	7.15232	6.89725	6.79726	6.83615	6.79778	6.98129	6.8246	6.77558	6.80377	6.74647	6.84501	6.89236	6.75553
ILMN_1652171	7.19385	7.14313	7.12074	7.07224	7.08068	7.06474	7.04793	7.11444	7.04526	6.97873	6.71508	6.69241	6.70577	6.69618	6.70699	6.75059	6.80559	6.68529	6.77063	6.63936	6.65397	6.68389
ILMN_1652175	7.16073	7.20471	7.03236	7.1042	7.16965	7.09276	7.13061	7.11444	7.07988	7.16257	6.81058	6.6479	6.70345	6.81795	6.72762	6.7208	6.74419	6.68937	6.75669	6.83988	6.62176	6.83058
ILMN_1652178	7.13008	7.05656	7.10231	7.01434	7.05493	7.06474	7.12163	7.08192	7.00726	7.12163	6.84621	6.64981	6.80531	6.82305	6.7429	6.92973	6.8164	6.7868	6.75259	6.72092	6.8246	6.69742
ILMN_1652181	7.12163	7.23522	7.08192	7.1042	7.18215	7.17141	7.2135	7.04731	7.13008	7.24861	6.76778	6.69241	6.65028	6.6889	6.70942	6.99458	6.72167	6.7311	6.76669	6.7859	6.68206	6.77072
ILMN_1652185	8.25856	8.41859	8.28233	8.23125	8.13903	8.51095	8.10571	8.00196	8.11576	7.86559	8.84781	8.67617	8.85715	8.76193	9.53745	8.86965	8.62839	8.96294	8.93581	8.50742	8.5879	9.29021
ILMN_1652188	7.06249	6.95396	7.13989	6.99798	7.16125	7.11222	7.01743	7.15174	7.06122	7.2135	6.82105	6.81283	6.76308	6.67491	6.89742	6.79424	6.69405	6.71813	6.65799	6.71741	6.74021	7.00748
ILMN_1652196	7.07224	7.13293	7.05129	7.08192	6.94122	7.04793	6.99577	7.09337	7.07988	6.97873	6.63738	6.70376	6.89111	6.70509	6.55711	6.72485	6.69529	6.77183	6.73501	6.67251	6.7416	6.52075
ILMN_1652198	7.73059	7.56548	7.44053	7.61333	7.46331	7.18952	7.4264	7.48541	7.47199	7.23584	6.89597	7.01794	6.86286	7.08013	6.96792	6.77188	6.92633	6.81589	7.0545	6.92594	6.83909	6.88274
ILMN_1652199	7.3806	7.28103	7.41037	7.84666	7.57605	7.8542	7.36704	7.84666	7.47199	7.28643	7.08168	6.94528	7.32326	7.32531	7.03951	6.97085	7.32926	7.80199	7.40497	7.68427	8.32454	7.34798
ILMN_1652205	7.08068	7.0762	7.10231	7.09529	7.08876	7.09276	7.12163	7.05986	7.2042	7.09154	6.69751	6.7385	6.79881	6.72762	6.64993	6.73861	6.68071	6.82089	6.74905	6.65672	6.81446	6.68389
ILMN_1652206	7.05493	6.94188	7.01218	6.99798	6.99048	7.1446	7.10231	7.02528	7.18215	7.06122	6.63619	6.76669	6.6722	6.60634	6.53921	6.70121	6.70089	6.62664	6.55975	6.62564	6.5373	6.56244
ILMN_1652207	13.1372	13.2379	13.6728	13.2379	13.518	13.6196	13.4428	13.7521	13.4428	13.8208	13.3944	13.3771	13.5721	13.5543	13.4607	13.6051	13.4674	13.6757	13.429	13.4432	13.5425	13.7269
ILMN_1652209	7.15292	7.25686	7.12074	7.11291	7.05493	7.10291	7.17273	7.1382	7.04526	7.08192	6.67491	6.62979	6.63516	6.72485	6.62637	6.71925	6.62849	6.61158	6.60539	6.64646	6.65237	6.65511
ILMN_1652215	7.40157	7.44914	7.31536	7.28583	7.38668	7.31961	7.32783	7.20005	7.34062	7.43212	6.83767	6.76669	6.86387	6.62733	6.75658	6.77452	6.80673	6.79121	6.86376	6.86286	6.85373	6.77213
ILMN_1652218	7.03737	7.11444	7.11222	7.04793	7.11291	7.04793	7.08068	7.11444	7.13008	7.09154	6.68206	6.76797	6.78032	6.67617	6.64356	6.62658	6.75034	6.71681	6.64305	6.61158	6.66063	6.66558
ILMN_1652219	7.01743	6.97359	7.10231	7.03095	6.99048	7.13759	7.02736	7.01218	6.99798	7.05001	6.56737	6.74776	6.71406	6.5867	6.78691	6.69024	6.73479	6.59362	6.66662	6.62323	6.78367	6.66915
ILMN_1652223	7.76614	7.97185	7.47945	7.67844	7.46331	7.48023	7.49771	7.22877	7.62582	7.28643	7.48591	7.45192	7.47589	7.72197	7.22673	6.89469	7.24572	6.9554	7.17039	7.43278	7.19196	7.02423
ILMN_1652230	14.1531	14.0815	13.9537	13.7607	13.8986	13.9271	14.0877	13.9959	14.1415	14.1259	13.1033	13.2604	13.4015	13.1176	13.1887	13.3771	13.299	13.3681	13.2644	13.4015	13.2548	13.429
ILMN_1652236	7.13008	7.1042	7.08192	7.11291	7.07099	7.08253	7.03737	7.22877	7.13872	7.10291	6.63619	6.67387	6.6603	6.67757	6.68745	6.69158	6.75624	6.71065	6.7553	6.70089	6.62517	6.64679
ILMN_1652237	7.1042	7.0857	7.01218	7.1289	7.12074	7.07347	7.24685	7.03675	7.14512	7.13061	6.77769	6.89393	6.84291	6.69618	6.86584	6.66926	6.67291	6.76542	6.67481	6.80717	6.72781	6.97993
ILMN_1652242	7.17383	7.21986	7.30054	7.16965	7.28789	7.1804	7.2135	7.18634	7.16965	7.22527	7.02418	6.89023	6.99403	6.91148	7.14545	6.75463	6.98181	6.99452	6.92374	6.84794	6.96214	6.81692
ILMN_1652243	7.12163	7.13293	7.18215	7.20684	7.06249	7.11222	7.15232	7.20005	7.16965	7.08192	6.64923	6.69742	6.62366	6.67094	6.58926	6.77895	6.65534	6.56822	6.7165	6.64646	6.72631	6.65511
ILMN_1652244	7.18215	7.1042	7.07224	7.07224	7.00077	7.01894	7.01743	7.05986	7.05266	7.08192	6.67138	6.78483	6.84923	6.75176	6.71873	6.70243	6.77315	6.70942	6.72045	6.81497	6.76837	6.63738
ILMN_1652246	7.06249	7.0762	7.17383	7.1042	7.17642	7.05656	7.08068	7.09337	7.12163	7.11291	6.73706	6.62647	6.63772	6.64658	6.66145	6.75059	6.78955	6.77183	6.73642	6.66468	6.89096	6.67595
ILMN_1652248	7.08068	7.21986	7.07224	7.08956	7.18215	7.16257	7.13061	7.1042	7.04526	7.07224	6.73706	6.69564	6.61276	6.68765	6.76925	6.78032	6.76552	6.75925	6.78986	6.61016	6.68206	6.90622
ILMN_1652249	7.01743	7.17898	7.01218	7.09529	7.16125	7.20684	7.13061	7.26357	7.1042	7.09154	6.69886	6.74919	6.88916	6.83591	6.89199	6.89643	6.69886	6.48362	6.96103	6.80304	6.81891	6.84142
ILMN_1652254	7.06249	7.22762	7.12074	7.09529	7.08068	7.08253	7.12163	7.2135	7.12163	7.07224	6.74892	6.89597	6.77063	6.66089	6.72233	6.76298	6.74647	6.89875	6.7938	6.66468	6.70433	6.68059
ILMN_1652259	7.02736	7.0857	7.01218	7.07224	7.1042	7.1446	7.04793	7.1289	7.07988	7.14066	6.65936	6.55686	6.55516	6.65304	6.71873	6.63855	6.67832	6.59214	6.61752	6.60199	6.59277	6.61916
ILMN_1652276	7.16819	7.0268	7.14838	7.09529	7.1446	7.16257	7.10231	7.20005	7.13008	7.18215	6.81058	6.76171	6.82051	6.94377	7.00178	6.87693	6.72045	6.94425	6.90755	6.89014	6.92646	6.80841
ILMN_1652277	7.20528	7.24861	7.21794	7.08956	7.09529	7.44914	7.16257	7.02528	7.14512	7.08192	6.86821	6.73371	6.75224	6.85273	6.83969	6.92159	6.831	6.59214	6.70842	6.85134	6.80045	6.77992
ILMN_1652280	7.21794	7.26903	7.11222	7.24685	7.30054	7.17141	7.08068	7.18634	7.25313	7.18215	6.97979	6.92691	6.96563	7.04112	6.89742	6.90566	6.91801	7.00984	6.89648	6.99517	6.8116	6.97627
ILMN_1652284	7.16073	7.16125	7.07224	7.06474	7.09529	7.09276	7.14254	7.1042	7.16184	6.99878	6.70222	6.65458	6.62757	6.71641	6.72233	6.72616	6.65672	6.56281	6.65418	6.68269	6.6979	6.67731
ILMN_1652287	7.20528	7.06611	7.09154	7.08192	7.08068	7.19888	7.14254	7.18634	7.07988	7.10291	6.67491	6.74919	6.69014	6.57491	6.66936	6.75347	6.60034	6.82947	6.77778	6.74905	6.73542	6.7429
ILMN_1652291	7.09031	7.0268	7.08192	7.13476	7.09529	7.15344	7.09031	7.11444	7.04526	7.05001	6.78483	6.70376	6.82177	6.69895	6.99403	6.56533	6.71065	6.54509	6.80313	6.75681	6.7913	6.73836
ILMN_1652297	7.18215	7.20471	7.14838	7.06474	7.08876	7.11222	7.03737	7.24582	7.1042	7.2135	6.76955	6.68735	6.76807	6.75624	6.7553	6.81681	6.78955	6.7311	6.81511	6.76242	6.76552	6.75712
ILMN_1652300	7.05493	7.0762	7.08192	7.04793	7.05493	7.06474	7.09031	7.1042	7.01607	7.09154	6.55109	6.66248	6.60132	6.55925	6.59575	6.54788	6.65304	6.54206	6.53268	6.49801	6.63516	6.66915
ILMN_1652306	7.22877	7.14313	7.21794	7.26563	7.22706	7.1446	7.27902	7.18634	7.26406	7.31076	6.89325	6.99517	6.81456	6.79005	7.01835	6.8246	6.93587	6.98302	6.82203	6.86986	6.83221	7.05354
ILMN_1652309	7.15292	7.12436	7.02231	7.1042	7.02736	6.97138	7.04793	7.03675	7.04526	7.05001	6.66572	6.82407	6.79111	6.71991	6.45282	6.79569	6.79871	6.80377	6.93874	6.85997	6.71882	6.69564
ILMN_1652313	7.28583	7.20471	7.24582	7.2574	7.30054	7.3087	7.17273	7.16257	7.28789	7.25947	6.80955	7.05824	7.03351	6.94684	6.99216	6.85255	6.94137	7.00363	6.95729	6.8946	7.02588	6.83484
ILMN_1652314	7.03737	7.0168	7.05129	7.08956	7.1382	7.07347	7.02736	7.08192	6.98011	7.03871	6.81058	6.6565	6.71173	6.74548	6.80189	6.7616	6.71925	6.73651	6.82548	6.75286	6.74776	6.68389
ILMN_1652319	7.11366	7.0168	7.27849	7.11291	7.17642	7.26664	7.07018	7.05986	7.07099	7.10291	6.72212	6.69241	6.78861	6.83857	6.82705	6.64923	6.68206	6.66763	6.93276	6.82029	6.86474	6.95827
ILMN_1652331	7.4149	7.32015	7.48983	7.30123	7.3981	7.49934	7.27902	7.2135	7.45907	7.23584	7.233	7.17735	7.18467	7.16298	7.74296	7.3945	7.13781	7.48406	7.55851	7.05117	7.49564	8.02669
ILMN_1652333	8.23642	8.24219	7.96718	8.28912	7.7512	7.70372	8.03765	7.91597	8.41146	7.60704	7.77847	8.02233	8.26757	7.843	7.62016	7.2498	8.27856	7.63831	7.54294	7.55961	7.86477	7.58719
ILMN_1652342	7.17383	7.28789	7.2116	7.12074	7.20528	7.11222	7.22527	7.11444	7.19024	7.10291	7.06548	7.06224	6.76435	7.25309	6.75286	6.78158	6.9005	7.0271	6.7553	6.92879	7.00466	7.11583
ILMN_1652343	7.09753	7.11444	7.13989	7.18952	7.08068	7.11955	7.03737	7.07099	7.08956	7.05001	6.7324	6.71054	6.66705	6.74311	6.74905	6.64807	6.8555	6.62143	6.76925	6.64178	6.71396	6.65166
ILMN_1652348	7.13008	7.15232	7.14838	7.18952	7.19888	7.32783	7.27902	7.15174	7.21794	7.11291	6.85868	6.66099	6.70345	6.7416	6.83189	6.87693	6.83564	6.71813	6.91666	6.76242	6.87518	6.66719
ILMN_1652357	7.93628	7.56548	7.9715	7.83118	7.71656	7.16257	7.54437	7.2135	7.89186	7.10291	7.33988	7.01567	7.14725	7.31622	7.05893	6.92973	7.07366	6.8332	7.11672	7.35813	7.17241	7.15167
ILMN_1652365	7.09031	7.11444	7.05129	7.1042	7.2193	7.05656	7.09031	7.00141	6.98847	7.09154	6.75414	6.75712	6.72791	6.70019	6.71991	6.70566	6.72293	6.6226	6.75925	6.82377	6.6722	6.73074
ILMN_1652366	7.21211	7.09467	7.03236	7.09529	7.05493	7.05656	7.07018	7.1382	7.01607	7.08192	6.61417	6.81283	6.62517	6.70376	6.71075	6.77188	6.72892	6.83058	6.6818	6.71352	6.78841	6.7883
ILMN_1652368	7.09753	7.05656	7.13989	7.08192	6.99048	7.16257	7.07018	7.02528	7.08956	7.009	6.7416	6.67731	6.65672	6.70912	6.64584	6.73741	6.60645	6.76669	6.65004	6.50803	6.63855	6.61051
ILMN_1652369	7.16819	7.11444	7.24582	7.20171	7.16125	7.13759	7.14254	7.24582	7.16184	7.18215	7.09856	6.7776	6.97428	6.92385	7.05354	6.95665	6.8438	7.22776	6.99026	7.06745	7.07107	7.00943
ILMN_1652371	7.13008	7.17898	7.10231	7.16965	7.1289	7.1446	7.12163	7.26357	7.13872	7.15232	6.78168	6.71661	6.82632	6.83189	6.76009	6.66636	6.65534	6.76426	6.891	6.6942	6.71882	6.59662
ILMN_1652376	7.15292	7.0857	7.09154	7.09529	7.08876	7.06474	7.08068	7.07099	7.02617	7.12163	6.76435	6.75088	6.72474	6.58794	6.66008	6.71519	6.64923	6.71439	6.67887	6.72747	6.54994	6.58938
ILMN_1652378	7.3087	7.32482	7.26903	7.29425	7.25796	7.13759	7.27902	7.08192	7.29776	7.24861	7.02044	7.05824	6.72111	7.00272	6.78566	6.83453	7.02214	6.93894	7.14545	7.31745	6.98302	6.80437
ILMN_1652379	8.17171	7.73832	7.79538	7.44967	7.63171	7.44053	7.79111	7.73777	7.46873	7.62302	7.53531	7.11668	7.09507	7.4214	7.01366	6.79712	7.08591	7.19915	7.22817	7.44514	7.54342	7.15678
ILMN_1652381	7.21794	7.20471	7.43463	7.36582	7.23472	7.18952	7.17273	7.16257	7.26406	7.17141	6.95836	6.94061	6.99504	7.06959	6.80189	7.10166	6.90737	7.00194	7.13642	6.99517	6.81446	7.15437
ILMN_1652392	7.1042	7.12436	7.07224	7.01434	7.02736	7.08253	7.13061	7.09337	7.18215	7.08192	6.76435	6.7416	6.75702	6.67757	6.67697	6.76925	6.69024	6.66385	6.75669	6.69024	6.76105	6.72443
ILMN_1652394	8.20261	7.92667	8.3528	8.27495	8.08444	9.29235	8.03126	9.38503	8.09828	9.09751	8.44198	8.68645	8.09208	8.1196	9.38884	9.3145	8.43034	8.99716	8.76168	8.8262	8.93258	9.21983
ILMN_1652397	6.99878	7.16125	7.05129	7.11291	7.05493	7.0109	7.07018	7.00141	7.07099	7.02964	6.60896	6.54333	6.65418	6.56968	6.48599	6.61775	6.72375	6.55493	6.74528	6.66889	6.54744	6.71641
ILMN_1652407	7.52421	7.57605	7.6047	7.51098	7.72072	7.44053	7.49771	7.11444	7.48756	7.31076	7.33653	7.56834	7.22941	7.5467	6.7938	7.2086	7.23458	6.99079	7.00076	7.27248	7.15132	6.98327
ILMN_1652409	7.29482	7.5053	7.26229	7.58367	7.3295	7.43463	7.43654	7.56548	7.33563	7.28643	7.30554	6.84981	7.16962	6.91148	7.05893	6.80541	7.43198	7.32748	7.02304	7.27948	6.75958	7.12812
ILMN_1652412	7.3087	7.24861	7.33868	7.13476	7.28375	7.0109	7.2135	7.11444	7.25796	7.09154	7.23524	7.32467	7.11668	7.12626	6.75414	7.05679	7.13645	6.92017	6.96911	7.19254	7.24658	6.76171
ILMN_1652413	7.00822	7.12436	7.08192	6.99798	7.07099	7.08253	7.03737	7.11444	7.03531	7.02964	6.80086	6.73706	6.66493	6.61431	6.76925	6.69843	6.81874	6.7399	6.70842	6.94743	6.75806	6.76637
ILMN_1652417	7.13008	7.0268	7.09154	7.16257	7.08068	7.11955	7.15232	7.18634	7.09674	7.17141	6.79664	6.81726	6.82051	6.7324	6.75414	6.74548	6.82875	6.7553	6.69014	6.7636	6.79588	6.71295
ILMN_1652424	7.16073	7.16965	7.04304	7.06474	7.09529	7.1289	7.20347	7.1382	7.16184	7.10291	6.69024	6.65281	6.68113	6.77432	6.68226	6.76009	6.69886	6.77432	6.6979	6.65534	6.86936	6.7868
ILMN_1652429	7.02736	7.06611	7.06249	6.98912	7.09529	7.1289	7.03737	6.98847	7.07988	7.08192	6.57515	6.64981	6.6603	6.51522	6.64827	6.67481	6.64283	6.74528	6.70577	6.62438	6.60909	6.65672
ILMN_1652430	7.13008	7.03737	7.08192	7.16257	7.05493	7.06474	7.10231	7.07099	7.1042	7.11291	6.76308	6.67084	6.71528	6.72485	6.61573	6.74548	6.70699	6.64063	6.65672	6.79101	6.78052	6.65511
ILMN_1652431	7.13008	7.05656	7.07224	7.1042	7.08068	7.20684	7.09031	7.00141	7.03531	7.10291	6.73371	6.65137	6.79111	6.79694	6.668	6.82744	6.72616	6.67438	6.72892	6.7197	6.79747	6.93151
ILMN_1652434	7.39106	7.32015	7.37216	7.32783	7.28789	7.31961	7.27902	7.24582	7.31961	7.2983	6.91304	6.99722	6.94929	6.89884	6.9448	6.84301	7.08887	6.90336	6.9889	6.99872	7.03413	6.96589
ILMN_1652436	7.09031	7.13293	7.18215	7.05656	7.07099	7.13759	7.19299	7.07099	7.08956	7.2135	6.62366	6.71054	6.64795	6.66089	6.64217	6.62658	6.70454	6.71439	6.75787	6.81147	6.65534	6.80437
ILMN_1652439	7.1382	7.16125	7.13008	7.1289	7.16125	7.1804	7.17273	7.11444	7.19024	7.25947	6.7887	6.93097	6.77296	6.71991	6.85879	6.99458	6.87595	6.9	6.66226	6.85311	6.84773	6.76448
ILMN_1652445	7.09031	7.05656	7.06249	7.15431	7.07099	7.11222	7.09031	7.03675	7.02617	7.13061	6.60896	6.59502	6.53706	6.68124	6.74537	6.62822	6.7883	6.74151	6.63399	6.66341	6.53947	6.99252
ILMN_1652450	7.12163	7.0268	7.13989	7.09529	7.04582	7.11955	7.12163	7.1042	7.02617	7.07224	6.45679	6.71661	6.51768	6.59214	6.61992	6.5727	6.668	6.58259	6.52895	6.68269	6.70931	6.94639
ILMN_1652456	7.06249	7.1042	7.05129	7.1042	7.18215	7.05656	7.05986	7.1382	7.13008	7.18215	6.77082	6.82407	6.75224	6.66341	6.71209	6.76797	6.831	6.72212	6.77915	6.7416	6.73542	6.68389
ILMN_1652459	7.25796	7.21986	7.36582	7.29425	7.25796	7.38597	7.41889	7.17383	7.25796	7.36005	6.94164	7.13992	7.03104	6.93565	7.22776	7.02686	6.93473	7.02978	6.89971	6.92255	7.01898	6.84708
ILMN_1652461	7.06249	7.13293	7.18215	7.16257	7.08876	7.11955	7.07018	7.08192	7.09674	7.12163	6.70832	6.84981	6.78158	6.65809	6.72364	6.76415	6.6745	6.7324	6.71396	6.76468	6.79747	6.978
ILMN_1652464	7.09753	7.06611	7.17383	7.15098	6.92358	7.17141	7.03737	7.08192	7.16184	7.16257	6.76212	6.7651	6.8574	6.86296	6.89585	6.8154	6.81058	6.7844	6.8292	6.81917	6.81305	7.06018
ILMN_1652465	7.09031	7.04731	7.10231	7.03095	7.05493	7.11955	7.07018	7.01218	6.9704	7.10291	6.70454	6.71352	6.7608	6.66216	6.8156	6.63538	6.63656	6.72605	6.70577	6.77546	6.7385	6.82428
ILMN_1652466	7.1042	7.13293	7.20062	7.16257	7.01894	7.11955	7.03737	7.11444	7.00726	7.09154	6.68418	6.67084	6.7429	6.64795	6.66695	6.74419	6.82335	6.76669	6.78264	6.79215	6.81305	6.69394
ILMN_1652469	7.09753	7.12436	7.12074	7.16257	7.24582	7.15344	7.17273	7.17383	7.21794	7.19299	6.70454	6.73096	6.72111	6.84031	6.71741	6.68071	6.7324	6.83058	6.75048	6.87282	6.79444	6.71489
ILMN_1652472	7.1382	7.14313	7.18215	7.18952	7.17642	7.08253	7.11291	7.17383	7.13872	7.14066	6.80189	6.90585	6.78158	6.81068	6.99534	6.84301	6.85771	6.75295	6.76797	6.72965	6.85997	6.83058
ILMN_1652486	7.66472	7.55936	7.44873	7.45805	7.54148	7.5986	7.40157	7.82863	7.51211	7.41164	7.45788	8.02808	7.67876	7.59723	7.37164	7.48983	7.65814	7.48406	7.59166	7.21124	7.16892	7.80256
ILMN_1652487	7.30676	7.25686	7.10231	7.27602	7.12074	7.1446	7.14254	7.1289	7.26903	7.14066	6.82225	6.76317	6.84824	6.95299	6.99534	6.77188	6.92159	6.98837	7.03509	6.88559	6.88673	6.86808
ILMN_1652488	7.20005	7.11444	7.07224	7.03095	7.11291	7.05656	7.23522	7.1382	7.03531	7.09154	6.65936	6.58102	6.64413	6.71154	6.86286	6.74548	6.77915	6.81355	6.7401	6.71489	6.70586	6.62356
ILMN_1652490	7.22364	7.18835	7.19138	7.33868	7.1446	7.15344	7.27902	7.04731	7.1975	7.16257	6.82105	6.77895	6.72222	6.87306	6.68745	6.65385	6.88808	6.67575	6.86376	6.96462	6.85373	6.73371
ILMN_1652494	7.20005	7.16125	7.05129	7.07224	7.17642	7.09276	7.11291	7.1289	7.16965	7.02964	6.82539	6.7776	6.63259	6.70642	6.81795	6.69564	6.73371	6.7429	6.8127	6.67627	6.83341	6.84142
ILMN_1652505	8.41964	8.30076	8.18751	8.11845	8.04265	7.49467	7.88503	7.50255	7.9504	7.48023	8.03966	8.40328	8.17073	8.1514	7.7445	7.62733	7.8043	7.38708	7.64207	7.61566	7.49921	7.12184
ILMN_1652507	7.11366	7.11444	7.06249	7.15431	7.08068	7.09276	7.22527	7.07099	7.13872	7.13061	6.65166	6.98673	6.76807	6.82762	6.91406	6.7616	6.69405	6.71065	6.65534	6.62438	6.75669	6.74776
ILMN_1652512	7.5053	7.94635	7.53119	7.47199	7.62302	7.52521	7.78482	7.58035	7.73832	7.44053	7.42647	7.61832	7.64634	7.27948	7.00938	7.12646	7.78756	7.20457	7.17945	7.49921	7.21627	7.03351
ILMN_1652521	8.23302	8.10837	7.88009	8.11845	7.93414	7.40368	7.88009	7.45315	8.03543	7.73225	7.7843	7.82741	7.66629	7.93734	7.4521	7.3502	7.573	7.36705	7.37007	7.33653	7.37686	6.9889
ILMN_1652525	7.84254	7.66014	8.20966	8.07926	8.15711	8.61489	7.75742	8.2332	7.70581	8.22075	7.97487	7.89315	7.9938	7.99729	8.96358	8.40407	7.19955	8.15911	7.82435	7.88533	8.08124	8.91411
ILMN_1652527	7.02736	7.13293	7.00141	7.12074	7.06249	7.05656	7.14254	7.03675	7.02617	7.16257	6.58139	6.65799	6.5353	6.53998	6.63726	6.53506	6.57102	6.64178	6.59628	6.47664	6.49842	6.61752
ILMN_1652533	7.3087	7.37666	7.34555	7.37134	7.43463	8.01276	7.55105	7.62181	7.4637	7.85929	6.83475	6.92104	6.83189	6.90985	7.00938	6.86277	6.867	7.00466	6.87255	7.01481	7.07107	6.86218
ILMN_1652540	7.32482	7.44407	7.52446	7.56793	7.47899	7.19888	7.38553	7.18634	7.41838	7.33662	7.48794	7.15429	7.27223	7.61351	6.77188	7.20233	7.07366	7.01757	7.04307	7.05602	6.9387	6.94816
ILMN_1652549	7.13008	7.26903	7.21794	7.1042	7.12074	7.20684	7.15232	7.11444	7.17642	7.10291	6.82438	6.73371	6.60034	6.80975	6.71489	6.65084	6.66572	6.68394	6.71519	6.70586	6.73096	6.76308
ILMN_1652550	7.05493	7.16965	7.08192	7.08956	7.1042	7.11955	7.07018	7.11444	7.17642	7.09154	6.72892	6.74441	6.66594	6.77537	6.74647	6.5727	6.79747	6.77063	6.70842	6.75034	6.79279	6.79694
ILMN_1652574	7.08068	6.99577	7.12074	7.12074	7.12074	7.06474	7.09031	7.09337	7.01607	7.05001	6.66683	6.72631	6.68372	6.55766	6.55711	6.69564	6.69641	6.58538	6.6818	6.70365	6.62176	6.70509
ILMN_1652577	7.07224	7.13293	7.13008	7.08956	7.04582	7.09276	7.00642	7.1289	7.09674	7.02964	6.76435	6.70222	6.74031	6.70243	6.69014	6.78851	6.74548	6.74905	6.87935	6.62058	6.80614	6.85661
ILMN_1652578	7.13008	7.0857	7.02231	7.12074	7.15344	7.17141	7.16257	7.09337	7.07988	7.06122	6.84945	6.76317	6.76435	6.82377	6.86286	6.79569	6.91801	6.71813	6.69014	6.9175	6.78986	6.69394
ILMN_1652580	7.47307	7.52596	7.40368	7.46331	7.46873	7.55176	7.53676	7.1042	7.46873	7.31076	7.30642	6.96322	7.35337	7.52097	7.1383	7.27095	7.1647	7.14303	7.19775	7.02996	7.19095	7.25774
ILMN_1652594	7.57112	7.71782	7.61763	7.53711	7.73777	7.95801	7.93488	7.92445	7.80019	7.81437	7.63945	7.84149	7.73329	7.58773	7.76302	7.75452	7.84085	7.79042	7.68628	7.38656	7.86754	7.84696
ILMN_1652602	7.40157	7.28789	7.13989	7.393	7.32482	7.57399	7.37666	7.16257	7.2294	7.32319	7.2377	6.86139	7.06023	7.12309	6.95486	7.22337	7.00641	6.72715	6.98828	7.01374	6.99458	7.06155
ILMN_1652604	7.25796	7.28103	7.26903	7.22998	7.07099	7.23667	7.09031	7.1289	7.12163	7.18215	6.72781	6.88371	6.84612	6.69158	6.83189	6.78851	6.70566	6.77778	6.97551	6.82143	6.89701	6.7883
ILMN_1652609	7.26357	7.15232	7.2116	7.2193	7.09529	7.1446	7.17273	7.16257	7.16965	7.31076	6.98059	6.78168	6.90824	6.95529	7.05893	7.24713	6.98087	6.9254	6.89742	7.10921	7.05047	6.85192
ILMN_1652611	7.09753	7.12436	7.07224	7.20171	7.07099	7.13759	7.09031	7.09337	7.1042	7.06122	6.72892	6.72474	6.66594	6.75402	6.73123	6.75463	6.72293	6.74528	6.73002	6.72485	6.69618	6.75712
ILMN_1652628	7.23522	7.1042	7.07224	7.03095	7.1382	7.21794	7.13061	7.17383	7.1042	7.14066	6.74991	6.89393	6.65534	6.80541	6.89334	6.77315	6.77222	6.71559	6.74905	6.75904	6.77441	6.72902
ILMN_1652631	12.6284	12.5953	12.8151	12.7681	12.8121	12.3779	12.7277	12.3128	12.7681	12.455	12.0829	12.5655	12.6788	12.2144	11.5917	12.2319	12.7427	12.1861	12.3149	12.4694	12.1825	11.9367
ILMN_1652638	7.50031	7.393	7.28583	7.34183	7.28789	7.24685	7.39384	7.22877	7.29776	7.38115	6.77546	6.83988	6.88401	6.95438	6.88	6.73204	6.9393	6.76936	6.96371	6.86901	6.8554	6.639
ILMN_1652639	7.20005	7.17898	7.13989	7.15098	7.04582	7.07347	7.11291	7.05986	7.08956	7.39106	6.77769	6.76009	6.81456	6.72364	6.71075	6.73204	6.70454	6.77778	6.77675	6.73096	6.76415	6.59872
ILMN_1652646	7.1446	7.12436	7.06249	7.06474	7.08876	7.02807	7.01743	7.04731	7.05266	7.19299	6.62507	6.62647	6.7429	6.62356	6.72762	6.77063	6.71065	6.68166	6.66226	6.7197	6.65926	6.69024
ILMN_1652647	7.35009	7.26903	7.41037	7.39756	7.51098	7.57399	7.37666	7.34183	7.34555	7.33662	7.11198	7.01296	7.16656	7.18709	6.99216	7.05832	7.19377	7.06467	7.18403	7.22878	7.098	6.87978
ILMN_1652649	7.03737	7.1042	7.18215	7.1289	7.11291	7.1804	7.11291	7.18634	7.18215	7.12163	6.94332	6.68568	6.91651	6.86633	6.76797	6.697	6.69751	6.72353	6.70355	6.63645	6.78545	6.77675
ILMN_1652650	7.1446	7.09467	7.13989	7.20684	7.20528	7.05656	7.13061	7.1289	7.11366	7.16257	6.76669	6.8318	6.79329	6.84773	6.75142	6.73204	6.82225	6.75669	6.74776	6.74647	6.80189	6.71295
ILMN_1652660	7.1382	7.14313	7.12074	7.14254	7.08068	7.17141	7.08068	7.04731	7.04526	7.07224	6.60896	6.79569	6.91348	6.71882	6.60132	6.76797	6.82089	6.82947	6.72616	6.64774	6.74776	6.7416
ILMN_1652662	7.15292	7.24097	7.11222	7.08192	7.1289	7.0109	7.12163	7.16257	7.01607	7.12163	6.87627	6.70852	6.74528	6.85373	6.78041	6.91708	6.85353	6.82335	6.83292	6.98673	6.62859	6.8841
ILMN_1652666	7.01743	7.04731	7.10231	6.94188	7.11291	6.99048	7.01743	7.50255	7.05266	7.08192	6.63984	6.57201	6.6603	6.70912	6.69916	6.70243	6.79279	6.5867	6.70478	6.65799	6.60539	6.65824
ILMN_1652670	7.17383	7.1042	7.02231	7.16965	7.15344	7.24685	7.11291	7.24582	7.09674	7.18215	6.8116	6.76317	6.77178	6.69518	6.70423	6.76669	6.7586	6.77063	6.84071	6.62708	6.62859	6.86218
ILMN_1652674	7.07224	7.00578	7.03236	7.08956	7.02736	7.08253	7.10231	7.11444	6.9495	7.18215	6.63984	6.96911	6.69261	6.81795	6.71352	6.77315	6.7586	6.63538	6.63726	6.69271	6.66375	6.71793
ILMN_1652677	7.21211	7.17898	7.28583	7.53711	7.4998	7.17141	7.13061	7.56548	7.07988	7.2983	7.01575	6.90402	6.93399	7.03744	7.58489	6.67606	7.14422	6.84353	7.30818	7.27333	7.09105	7.07522
ILMN_1652680	8.72567	8.36483	8.58184	8.805	8.6521	7.26664	8.78052	8.33551	8.54174	7.46976	7.20634	7.13163	6.92273	7.23372	7.38081	7.37797	7.09673	7.22776	7.12535	7.33351	6.89547	6.95979
ILMN_1652685	7.05493	7.09467	7.00141	7.04793	7.22706	7.06474	7.17273	7.05986	7.12163	7.09154	6.68529	6.48285	6.60896	6.60024	6.68745	6.81835	6.5655	6.62517	6.65142	6.70089	6.6979	6.67062
ILMN_1652687	7.11366	7.12436	7.14838	7.05656	7.07099	7.09276	7.13061	7.17383	7.08956	7.03871	6.65418	6.82225	6.77432	6.89245	6.7553	6.70821	6.76669	6.82947	6.65672	7.07531	6.71075	6.73521
ILMN_1652689	7.12163	7.1042	7.15746	7.1289	7.11291	7.10291	7.02736	7.1289	7.17642	7.02964	6.73123	6.61775	6.80304	6.58938	6.72364	6.67062	6.64401	6.68394	6.75669	6.75142	6.69618	6.59662
ILMN_1652693	7.06249	7.0762	7.13989	7.07224	7.1382	7.09276	7.02736	7.02528	7.00726	7.06122	6.90919	6.86296	6.72343	6.71772	6.9026	6.73204	6.8946	6.70699	6.87358	6.83667	6.5907	6.76171
ILMN_1652694	7.26357	7.15232	7.10231	7.12074	7.05493	7.10291	7.14254	7.16257	7.07099	7.17141	6.91304	6.86621	6.93631	6.85004	7.02996	6.86553	6.82875	6.94777	7.17898	6.90229	6.94425	6.82428
ILMN_1652700	7.13008	7.11444	7.11222	7.11291	7.08068	7.19888	7.12163	7.20005	7.07988	7.16257	6.96195	7.25361	6.84392	6.73446	6.79111	6.76669	6.84713	6.83698	6.81511	6.83879	6.76105	6.99075
ILMN_1652701	7.09031	7.11444	7.06249	7.06474	7.1042	7.09276	7.02736	7.05986	7.13872	7.08192	6.67947	6.8332	6.72605	6.68012	6.73956	6.60896	6.67957	6.69453	6.68443	6.81375	6.59444	6.60659
ILMN_1652711	7.05493	7.05656	7.15746	7.14254	7.00822	7.16257	7.13061	7.18634	7.00726	7.06122	6.71264	6.66248	6.81835	6.84704	6.58393	6.9403	6.64401	6.84612	6.59167	6.72965	6.68206	6.89343
ILMN_1652715	7.18215	7.11444	6.99048	7.07224	7.12074	7.13759	7.17273	7.1382	7.03531	7.06122	6.80955	6.7324	6.75325	6.72892	6.67198	6.70566	6.67832	6.63139	6.88897	6.76468	6.5168	6.66385
ILMN_1652716	7.01743	7.13293	7.04304	7.04793	7.04582	7.10291	7.01743	7.07099	6.95782	7.09154	6.59575	6.62497	6.65672	6.65039	6.58926	6.48117	6.62849	6.49847	6.64892	6.7071	6.57102	6.78264
ILMN_1652719	6.99878	7.0857	7.15746	7.08192	7.02736	7.03737	7.02736	7.05986	6.98847	7.13061	6.76094	6.67731	6.67356	6.71991	6.69261	6.78032	6.79082	6.75414	6.68735	6.78032	6.78986	6.70689
ILMN_1652721	7.1382	7.14313	7.17383	7.13476	7.03737	7.07347	7.09031	7.1289	7.1042	7.13061	6.7405	6.78986	6.86896	6.82098	6.66695	6.77188	6.67198	6.85592	6.75156	6.76955	6.73542	6.56609
ILMN_1652722	9.13932	9.21115	9.66372	9.3888	9.61765	9.49723	9.42359	9.5433	9.55341	9.83726	9.23762	9.29046	9.30671	9.47733	9.60343	9.30954	9.46291	9.69478	9.36189	9.77365	9.47876	9.2419
ILMN_1652727	6.99878	7.0762	7.15746	7.01434	6.99048	7.11222	7.04793	7.02528	7.16184	7.07224	6.65936	6.8332	6.61667	6.55257	6.77188	6.66216	6.65418	6.69453	6.57916	6.81037	6.611	6.59468
ILMN_1652729	7.07224	7.13293	7.06249	7.05656	7.1382	7.21794	7.02736	7.00141	7.1042	7.08192	6.70704	6.7586	6.81456	6.66594	6.7416	6.74658	6.7405	6.90439	6.75925	6.75142	6.74441	6.65672
ILMN_1652732	6.99878	7.18835	7.17383	7.19579	7.2193	7.11955	7.14254	7.16257	7.16965	7.06122	6.88132	6.81896	6.6603	6.62356	6.88916	6.60896	6.67291	6.75787	6.79601	6.78032	6.78221	6.76171
ILMN_1652735	7.40157	7.38668	7.30054	7.49672	7.3591	7.16257	7.40157	7.36061	7.37666	7.23584	7.05606	7.15272	7.04069	7.10669	6.8438	6.69997	6.93851	6.88586	6.87636	6.85997	6.9114	7.02012
ILMN_1652736	7.77916	7.77749	7.67244	7.70503	7.49586	7.36061	7.62582	7.50255	7.60704	7.49821	7.52876	7.10599	7.18602	7.29223	6.9577	6.92159	7.35761	7.22776	7.61812	7.77977	7.19584	7.53436
ILMN_1652737	7.05493	7.06611	7.03236	7.03095	7.00822	7.08253	7.10231	7.11444	6.99798	7.02964	6.61032	6.64144	6.58283	6.5655	6.62637	6.54532	6.70942	6.68664	6.58427	6.49877	6.75806	6.61051
ILMN_1652740	7.1446	7.0857	7.08192	7.1042	7.06249	7.18952	7.15232	7.28257	7.06122	7.06122	6.7324	6.7324	6.64413	6.76171	6.71991	6.58383	6.81058	6.63936	6.72762	6.71489	6.68361	6.70365
ILMN_1652745	7.1042	7.04731	7.08192	7.06474	7.20528	7.03737	7.09031	7.20005	7.13872	6.99878	6.61158	6.59022	6.60539	6.66594	6.68361	6.69158	6.7429	6.70443	6.72485	6.70586	6.67062	6.69742
ILMN_1652747	7.13008	7.263	7.20062	7.16965	7.1446	7.17141	7.14254	7.1289	7.1975	7.16257	6.81795	6.6889	6.78756	6.76533	6.80541	6.66063	6.62598	6.70821	6.81511	6.78362	6.77642	6.6889
ILMN_1652749	7.34555	7.5053	7.30823	7.36061	7.3639	8.05957	7.31823	7.56548	7.39106	7.75293	7.12435	7.53625	7.34868	7.32632	7.87148	7.77685	7.16784	7.30724	7.35512	7.37471	7.15412	7.71498
ILMN_1652753	8.10274	7.66014	7.79538	7.9074	7.78722	7.1804	7.76582	7.1382	7.74413	7.19299	7.67117	7.63024	7.40251	7.71578	6.7883	6.96462	7.5468	6.85353	7.04561	7.09677	7.10913	6.84708
ILMN_1652754	9.19739	9.64725	9.50068	9.26752	9.65303	9.54945	9.83077	9.76341	9.51046	9.67349	9.25869	9.57893	9.437	9.18895	9.38331	9.56696	9.75994	9.8643	9.85861	9.50485	9.7258	9.48206
ILMN_1652756	7.1382	7.0857	7.04304	7.01434	7.12074	7.08253	7.00642	7.05986	7.1042	7.09154	6.76669	6.73371	6.64272	6.70642	6.61992	6.68071	6.8793	6.60155	6.70211	6.64902	6.69923	6.7868
ILMN_1652758	7.16073	7.09467	7.27849	7.1289	7.18215	7.1804	7.10231	7.09337	7.08956	7.18215	6.73123	6.69564	6.69596	6.78232	6.73555	6.89199	6.82554	6.78806	6.66662	6.69553	6.68361	6.70965
ILMN_1652761	7.06249	7.12436	7.26903	7.18952	7.08068	7.06474	7.02736	7.1042	6.98847	7.11291	6.64356	6.76317	6.72343	6.67094	6.74419	6.8288	6.73716	6.82335	6.6818	6.60199	6.81891	6.70965
ILMN_1652762	7.82206	7.92667	7.87518	7.81912	7.76525	8.40172	8.11589	8.78789	7.99246	8.35025	7.81235	8.25368	8.52017	7.68808	8.25307	9.14525	8.61963	9.14653	8.58489	8.05781	8.9901	8.84247
ILMN_1652763	7.24039	7.263	7.30823	7.28789	7.15344	7.27801	7.23522	7.32264	7.26406	7.36005	6.93321	7.10356	6.95124	7.03499	6.88916	6.80975	7.09783	6.82592	6.96788	7.12405	7.11111	6.97486
ILMN_1652768	14.135	14.2292	14.375	14.4204	14.135	14.3684	14.3845	14.3443	14.135	14.2292	14.3121	14.1596	14.2159	14.383	14.1309	13.9624	14.1419	14.1309	14.0552	13.9527	14.1985	14.0818
ILMN_1652777	7.67844	7.41207	7.51248	7.41207	7.27701	7.16257	7.36704	7.28257	7.4637	7.11291	7.06982	6.98484	7.11317	7.06367	7.09323	6.72616	6.87595	6.9492	6.86713	6.93172	6.7703	7.09584
ILMN_1652780	7.07224	7.04731	7.02231	7.08192	7.00822	6.97138	7.03737	7.03675	7.07988	7.06122	6.62989	6.68568	6.78515	6.70131	6.64217	6.70699	6.63888	6.59214	6.60692	6.61016	6.64519	6.80975
ILMN_1652784	7.08068	7.0168	7.06249	7.07224	7.1382	7.19888	7.00642	7.08192	7.01607	7.09154	6.76435	6.65281	6.66594	6.75259	6.61871	6.69564	6.75516	6.69453	6.63538	6.72092	6.68664	6.80975
ILMN_1652786	7.09753	7.05656	7.02231	7.1289	7.00077	7.09276	7.05986	7.1042	7.00726	7.009	6.51873	6.66248	6.60034	6.61972	6.56663	6.50483	6.55833	6.64753	6.64154	6.43787	6.67062	6.67387
ILMN_1652787	7.51629	7.37666	7.76971	7.37666	7.58106	7.40368	7.35822	7.17383	7.48189	7.32319	6.93771	6.6889	6.76945	6.9175	6.8207	6.65936	6.93019	6.69453	6.83171	6.85402	6.79444	6.8382
ILMN_1652790	7.27902	7.22762	7.2116	7.24685	7.28375	7.24685	7.29776	7.1042	7.24039	7.5053	6.92159	6.99087	6.84392	6.99035	6.90554	6.76298	6.90327	6.98181	6.98828	6.96125	6.81446	7.08626
ILMN_1652797	7.13008	7.2135	7.10231	7.09529	7.08876	7.18952	7.20347	7.17383	7.15344	7.06122	6.73966	6.7416	6.8945	6.79472	6.89052	6.71925	6.90824	6.80502	6.70965	6.68765	6.79279	6.80559
ILMN_1652799	7.12163	7.09467	7.07224	7.16257	7.2135	7.08253	7.13061	7.07099	7.1042	7.12163	6.64807	6.63656	6.7429	6.72134	6.668	6.80294	6.7405	6.75787	6.62822	6.74548	6.68848	6.70509
ILMN_1652806	8.88609	8.66181	9.04697	8.77309	9.17846	8.44577	9.04387	8.76306	8.95335	8.639	9.13356	9.12166	9.18318	8.84168	8.58555	9.43095	9.30323	9.01167	8.72614	9.37766	9.19535	8.57922
ILMN_1652807	7.12163	7.04731	7.03236	7.1042	7.06249	7.02807	7.15232	7.09337	7.14512	7.08192	6.83341	6.69036	6.79664	6.71044	6.6979	6.63247	6.77432	6.7324	6.9196	6.68529	6.95124	6.80975
ILMN_1652808	7.08068	7.0762	7.06249	7.04793	7.12074	7.04793	7.10231	7.02528	7.06122	7.08192	6.70704	6.64144	6.66946	6.75259	6.72892	6.65799	6.68341	6.98837	6.68869	6.68166	6.88028	6.77072
ILMN_1652819	7.21211	7.16965	7.38668	7.19579	7.25796	7.07347	7.27902	7.02528	7.25313	7.13061	6.83767	6.74776	6.8564	7.1526	6.71209	6.72762	6.90537	6.65672	6.87133	6.8127	6.76253	6.91282
ILMN_1652825	8.97052	10.1036	9.4902	9.07027	9.42576	10.2036	10.0842	10.1842	9.58373	10.1054	10.5473	10.449	10.7902	10.2602	10.9964	10.9226	10.0132	10.7902	10.5988	10.0014	10.1769	11.1
ILMN_1652826	7.06249	7.06611	7.09154	7.02373	7.11291	7.1289	7.17273	7.15174	7.11366	7.07224	6.69271	6.70078	6.63645	6.62989	6.703	6.85125	6.65936	6.72978	6.76669	6.73346	6.70089	6.7196
ILMN_1652837	7.1382	7.0762	7.15746	7.09529	7.08876	7.07347	7.18215	7.07099	7.1975	7.05001	6.80313	6.6991	6.75325	6.66719	6.69663	6.89469	6.77124	6.8584	6.61752	6.72092	6.66915	6.66008
ILMN_1652846	7.34062	7.32996	7.06249	7.29425	7.20528	7.36061	7.23522	7.22877	7.25796	7.18215	6.73706	6.73555	6.81335	6.91079	6.62497	6.80115	6.78483	6.71439	6.79986	6.7416	6.85997	6.71489
ILMN_1652852	7.08068	7.16125	6.99048	6.97138	7.12074	7.07347	7.05986	7.11444	7.05266	7.05001	6.64113	6.63506	6.83736	6.71991	6.7405	6.77602	6.67595	6.67438	6.76435	6.76689	6.64178	6.93002
ILMN_1652854	7.09753	7.0762	7.12074	7.12074	7.11291	7.07347	7.01743	7.15174	7.09674	7.10291	6.74776	7.0081	6.7608	6.66842	6.70423	6.60142	6.70222	6.79601	6.74776	6.8127	6.84621	6.62708
ILMN_1652857	7.13008	7.14313	7.11222	7.06474	7.05493	7.22762	7.15232	7.01218	7.14512	7.15232	6.74991	6.63656	6.70699	6.66341	6.64217	6.82612	6.71538	6.62002	6.63399	6.62323	6.63516	6.74605
ILMN_1652865	7.16819	7.05656	7.09154	6.99798	7.05493	7.13759	7.07018	7.00141	7.21794	7.19299	6.7252	6.83844	6.83969	6.62989	6.82428	6.83597	6.77315	6.86777	6.70211	6.80086	6.75958	6.69231
ILMN_1652866	7.1382	7.06611	7.14838	7.16965	7.15344	7.05656	7.12163	7.05986	7.03531	7.10291	6.70942	6.77129	6.78756	6.72364	6.76298	6.75059	6.78362	6.76426	6.92813	6.79871	6.78705	6.784
ILMN_1652871	7.1042	7.09467	7.00141	7.09529	7.25082	7.28789	7.08068	7.09337	7.13008	7.13061	6.82225	6.82407	6.78986	6.69261	6.64827	6.78705	6.70454	6.60759	6.65004	6.80304	6.63198	6.67595
ILMN_1652872	7.21794	7.18835	7.20062	7.23584	7.29582	7.24685	7.33868	7.59555	7.19024	7.13061	6.85369	6.96121	6.92562	6.97611	6.95649	7.19584	7.09891	7.07009	7.02304	6.87282	7.02996	6.98657
ILMN_1652876	7.01743	7.06611	7.18215	7.07224	7.02736	7.09276	7.03737	7.1289	7.04526	7.12163	6.69631	6.48566	6.78756	6.58538	6.63153	6.76415	6.78483	6.67924	6.68024	6.55516	6.74301	6.69886
ILMN_1652881	7.22364	7.11444	7.17383	7.16257	7.09529	7.04793	7.09031	7.02528	7.14512	7.11291	6.6424	6.71508	6.83306	6.81578	6.70942	6.62822	6.96764	6.88112	6.6234	7.05969	6.7324	6.73685
ILMN_1652888	7.13008	7.09467	7.13989	7.13476	7.2135	7.1289	7.03737	7.07099	7.13008	7.2042	6.79329	6.81446	6.83306	6.71276	6.78966	6.72616	6.69158	6.85481	6.7887	6.70222	6.68664	6.80304
ILMN_1652890	7.16819	7.0762	7.05129	7.05656	7.07099	7.03737	7.03737	7.04731	7.13872	7.10291	6.77546	6.70078	6.62272	6.64795	6.8207	6.66636	6.63247	6.73501	6.72045	6.70586	6.66915	6.68389
ILMN_1652906	8.3047	8.39187	8.30872	8.35353	8.18369	8.11845	8.50934	8.45318	8.12444	8.07212	8.39714	8.61497	8.83247	7.93096	8.06056	7.96684	8.76218	8.76952	8.66346	8.46564	8.53211	8.09685
ILMN_1652907	7.54619	7.51098	7.25313	7.42033	7.36982	7.69679	7.30823	7.82863	7.39106	7.84254	6.72333	6.73706	6.71406	6.88808	6.75658	6.86713	6.8946	6.67291	6.84291	6.86808	6.73096	6.79539
ILMN_1652913	7.12163	7.1042	7.12074	7.18215	7.16125	7.08253	7.22527	7.1289	7.13872	7.09154	6.60583	6.75248	6.75325	6.73802	6.78691	6.68071	6.78705	6.70066	6.78149	6.77664	6.65534	6.67062
ILMN_1652918	7.23522	7.15232	7.30054	7.16257	7.19138	7.46409	7.15232	7.48541	7.21794	7.46976	7.05728	6.95141	6.96205	6.98312	7.98799	7.78346	7.00943	7.64441	7.23864	7.11121	7.29069	8.09617
ILMN_1652927	7.20005	7.15232	7.06249	7.17642	7.11291	7.16257	7.11291	7.11444	7.17642	7.15232	6.82335	7.06224	6.82051	6.76764	6.79111	6.69843	6.82447	6.7324	6.85812	6.79215	6.71559	6.68389
ILMN_1652928	7.19385	7.29482	7.33868	7.2135	7.23982	7.75293	7.25796	7.17383	7.27602	7.31076	6.82846	6.92104	7.10977	7.1789	7.60527	7.17898	6.95011	7.12922	7.18266	7.31745	6.7703	7.632
ILMN_1652929	7.16073	7.28789	7.33868	7.2135	7.33662	7.54619	7.19299	7.30054	7.38668	7.60704	6.88741	7.0682	7.10006	7.07656	7.07154	7.04186	7.07291	7.20856	7.00363	7.11744	6.91618	7.02288
ILMN_1652931	7.1446	7.11444	7.06249	7.1289	7.09529	7.08253	7.11291	7.02528	7.06122	7.18215	6.61536	6.64305	6.67595	6.72364	6.6129	6.77452	6.72892	6.71813	6.67741	6.75414	6.82194	6.71641
ILMN_1652938	7.04582	7.0268	7.18215	7.19579	7.07099	7.13759	7.19299	7.1382	7.09674	7.14066	6.60417	6.67731	6.86176	6.71396	6.7553	6.72762	6.78483	6.65936	6.63129	6.67251	6.72343	6.67387
ILMN_1652939	7.13008	7.23522	7.20062	7.1289	7.18215	7.23667	7.12163	7.28257	7.12163	7.2135	6.71824	6.84824	6.86286	6.6129	6.79111	6.65084	6.69751	6.86633	6.93276	6.75904	6.79747	6.83655
ILMN_1652940	7.16819	7.0168	7.15746	7.08192	7.08876	7.06474	7.11291	7.26357	6.98847	7.06122	6.72443	6.96527	6.86896	6.69751	6.68496	6.88897	6.662	6.7553	6.64434	6.60742	6.84904	6.69231
ILMN_1652946	7.04582	7.1042	7.14838	7.13476	7.12074	6.99048	7.12163	7.11444	7.12163	7.2042	6.78275	6.77569	6.78861	6.83767	6.88136	6.79121	6.64401	6.74776	6.75414	6.78841	6.76253	6.77213
ILMN_1652952	7.09031	7.0857	7.14838	7.15431	7.06249	7.07347	7.11291	7.07099	7.01607	7.03871	6.64679	6.70566	6.75702	6.58283	6.61573	6.69024	6.72375	6.64993	6.65672	6.67909	6.5867	6.63236
ILMN_1652955	11.5523	11.3103	11.5392	11.378	11.532	11.378	11.223	11.1408	11.3689	11.7057	9.89852	9.37248	9.11593	9.93657	10.1454	9.34677	9.56166	9.75635	9.46257	10.1739	9.94054	10.1259
ILMN_1652959	7.16819	7.12436	7.13008	7.14254	7.15344	7.19888	7.26855	7.05986	7.12163	7.18215	6.7265	6.61611	6.83615	6.82762	6.91704	6.68071	6.69158	6.73371	6.80545	6.63119	6.82622	6.6889
ILMN_1652963	7.18215	7.00578	7.09154	7.04793	7.09529	7.07347	7.00642	7.1382	7.04526	7.009	6.65304	6.68568	6.73391	6.67757	6.82428	6.69564	6.70942	6.64993	6.74528	6.66468	7.01898	6.7196
ILMN_1652967	7.05493	7.09467	7.08192	7.1042	7.16965	7.13759	7.11291	7.08192	7.01607	7.10291	6.64923	6.62329	6.77546	6.63748	6.71075	6.6722	6.75388	6.64317	6.59628	6.76242	6.71741	6.61573
ILMN_1652969	7.20005	7.1042	7.02231	7.06474	7.06249	7.1289	7.17273	7.04731	6.99798	7.05001	6.73501	6.90985	6.82177	6.85181	6.85054	6.86434	6.77915	6.68937	6.75259	6.82029	6.72932	6.662
ILMN_1652975	7.06249	7.03737	7.18215	7.11291	7.07099	7.11955	7.05986	7.08192	7.08956	7.12163	6.69886	6.65799	6.69014	6.94061	6.82947	6.76415	6.82225	6.86108	6.71133	6.73096	6.88673	6.60479
ILMN_1652977	7.08068	7.16125	7.13989	7.07224	7.12074	7.08253	7.07018	7.11444	7.1042	7.10291	6.70942	6.78358	6.71793	6.72762	6.74905	6.72212	6.57237	6.69923	6.79871	6.6942	6.73096	6.56785
ILMN_1652982	7.04582	7.03737	7.11222	7.1289	7.07099	6.99048	7.01743	7.17383	7.15344	7.009	6.68418	7.03701	6.70577	6.66341	6.66936	6.72485	6.62481	6.67051	6.78032	6.7616	6.64701	6.68735
ILMN_1652989	8.37962	8.87009	8.32874	8.22942	8.08968	7.92489	8.23267	7.24582	8.47668	7.73777	7.45973	7.44387	7.48227	7.85279	6.94816	7.3502	7.4714	7.15505	7.32467	7.52064	7.35906	6.99917
ILMN_1652990	7.16819	7.16965	7.13008	7.13476	7.1042	7.20684	7.11291	7.20005	7.13872	7.17141	6.86462	6.69564	6.74419	6.75259	6.6745	6.69024	6.66572	6.76171	6.71925	6.67627	6.72485	6.77537
ILMN_1652991	7.09031	7.0857	7.13008	7.08192	7.06249	7.10291	7.14254	7.1382	7.13008	7.17141	6.56995	6.56646	6.72923	6.56822	6.77558	6.61051	6.71186	6.65936	6.59795	6.67909	6.65039	6.68226
ILMN_1652992	7.05493	7.04731	7.10231	7.03095	6.96389	7.06474	7.03737	7.07099	7.14512	7.02964	6.77546	6.65281	6.57486	6.67757	6.63726	6.67762	6.67062	6.83857	6.80545	6.57221	6.5907	6.77213
ILMN_1652996	7.08068	7.13293	7.09154	7.16965	7.1289	7.19888	7.07018	7.24582	7.13008	7.16257	6.7265	6.72147	6.74031	6.7583	6.72233	6.53369	6.78032	6.67697	6.8268	6.72485	6.78221	6.67387
ILMN_1652998	6.99048	7.11444	7.13008	7.04793	6.99048	7.0109	7.15232	7.03675	7.07988	7.10291	6.66926	6.74776	6.6862	6.70019	6.62215	6.54532	6.57102	6.75048	6.59468	6.74419	6.74301	6.61916
ILMN_1653001	7.29482	7.04731	7.13008	7.22998	7.25796	6.98085	7.10231	7.20005	7.18215	7.05001	6.88132	6.93874	7.01575	7.04872	6.88916	6.84602	7.0812	6.97296	6.9515	7.05286	7.04009	6.83969
ILMN_1653006	7.04582	7.06611	7.13008	7.03095	7.26406	7.06474	7.05986	6.98847	7.01607	7.05001	6.67731	6.77305	6.80159	6.72978	6.68226	6.80856	6.69751	6.67187	6.64305	6.68269	6.75367	6.70211
ILMN_1653018	7.05493	7.0857	7.04304	7.14254	7.03737	7.08253	7.13061	7.04731	6.9704	7.07224	6.69271	6.75088	6.5867	6.62356	6.73002	6.66778	6.56244	6.60896	6.74528	6.64902	6.68664	6.70509
ILMN_1653026	11.2732	11.3239	10.8502	10.5617	10.5842	9.81256	11.1717	8.89882	10.1547	9.27105	11.1607	10.2235	10.414	11.3519	9.45243	11.2708	11.0348	9.34413	9.46587	10.6513	9.89957	8.71798
ILMN_1653028	7.21211	7.11444	7.13989	7.1042	7.20528	7.10291	7.11291	7.1042	7.12163	7.06122	6.78389	6.78358	6.7583	6.79472	6.87133	6.89742	6.86376	6.96103	6.89307	6.88371	6.86474	6.88274
ILMN_1653031	7.22877	7.2135	7.06249	7.1289	7.09529	7.09276	7.14254	7.1042	7.04526	7.06122	6.73371	6.58649	6.80407	6.8595	6.66406	6.68226	6.81407	6.7399	6.76925	6.77432	6.44232	6.69231
ILMN_1653033	7.15292	7.21986	7.17383	7.2193	7.16965	7.24685	7.24685	7.1042	7.14512	7.10291	6.8949	6.65458	6.75967	6.69895	6.78294	6.58383	6.64283	6.69195	6.86474	6.70478	6.75367	6.83484
ILMN_1653039	8.16576	7.83215	8.03504	7.99246	8.06174	8.13774	8.33812	8.01168	7.86862	8.30742	7.09348	6.97347	6.993	7.07913	7.06727	6.68071	7.07076	7.12074	7.01571	7.02996	7.0737	6.98177
ILMN_1653040	7.07224	7.0857	7.10231	7.06474	7.00077	7.17141	7.13061	7.11444	7.07988	7.11291	6.68765	6.68221	6.74031	6.76665	6.703	6.7416	6.70222	6.65936	6.65799	6.79631	6.7385	6.67387
ILMN_1653042	7.12163	7.24861	7.14838	7.15098	7.12074	7.11222	7.15232	7.16257	7.15344	7.10291	6.77652	6.82051	6.76308	6.9175	7.06297	6.93735	6.77315	6.89875	6.83171	6.89199	6.8584	6.71489
ILMN_1653043	7.09031	7.06611	7.2116	7.1042	7.1289	7.09276	7.04793	7.20005	7.08956	7.009	6.7324	6.69742	6.74647	6.72762	6.70423	6.68361	6.64283	6.66522	6.68869	6.74647	6.69618	6.72443
ILMN_1653047	7.29482	7.2135	7.21794	7.2135	7.17642	7.1804	7.20347	7.1042	7.13872	7.25947	6.73501	6.91904	6.73142	6.75176	6.91704	6.67762	6.7416	6.92282	6.86713	6.88916	6.65926	6.80559
ILMN_1653055	7.09031	7.06611	7.14838	7.12074	7.06249	7.08253	7.22527	7.03675	7.11366	7.009	6.68529	6.69564	6.65153	6.801	6.71991	6.78032	6.65074	6.68664	6.7165	6.58318	6.68529	6.73685
ILMN_1653056	7.21794	7.16125	7.16498	7.23584	7.33662	7.38597	7.19299	7.30054	7.28103	7.27394	7.15896	7.37322	7.72865	7.41327	7.21358	7.55708	7.10251	7.23979	7.12022	6.99458	7.098	7.08944
ILMN_1653057	7.09753	7.0857	7.19138	7.12074	7.15344	7.16257	7.16257	7.08192	7.32482	7.12163	6.75647	6.76797	6.72004	6.74311	6.69394	6.78851	6.71295	6.66636	6.67356	6.73966	6.58503	6.71295
ILMN_1653073	7.16819	7.0762	7.08192	6.98085	7.06249	7.1446	7.10231	7.08192	7.03531	7.09154	6.60896	6.64144	6.59818	6.63129	6.50773	6.6861	6.67291	6.49402	6.62497	6.62323	6.69463	6.59662
ILMN_1653077	7.13008	7.11444	7.12074	7.1042	7.2135	7.11955	7.07018	7.1382	6.99798	7.06122	6.82539	6.60285	6.67731	6.70783	6.63453	6.80115	6.69271	6.91885	6.66522	6.68044	6.75958	6.48349
ILMN_1653092	7.16819	7.16125	7.19138	7.08192	7.06249	7.0109	7.18215	7.1042	7.09674	7.09154	6.64807	6.70566	6.71793	6.66341	6.71352	6.74658	6.74776	6.70699	6.79871	6.89561	6.78545	6.79995
ILMN_1653098	7.01743	7.11444	6.95684	7.11291	7.01894	6.98085	7.00642	7.07099	7.05266	7.03871	6.7429	6.97347	6.54036	6.60386	6.61871	6.64272	6.48098	6.628	6.57916	6.64495	6.72781	6.65004
ILMN_1653102	7.09031	7.13293	7.19138	7.09529	7.09529	7.20684	7.12163	7.04731	7.04526	7.09154	6.73023	6.71824	6.69126	6.64369	6.76669	6.63855	6.74905	6.63807	6.68316	6.67762	6.72781	6.7196
ILMN_1653103	7.06249	7.12436	7.11222	7.01434	7.04582	7.1446	7.09031	7.11444	6.99798	7.06122	6.78275	6.83475	6.81589	6.9293	6.73956	6.71086	6.79082	6.70821	6.71396	6.62708	6.79588	6.69742
ILMN_1653106	7.12163	7.11444	7.14838	7.15431	7.20528	7.1804	7.09031	7.1382	7.16965	7.06122	6.8127	6.7385	6.74528	6.70376	6.68745	6.62658	6.76308	6.80377	6.69126	6.66742	6.61431	6.70689
ILMN_1653115	10.8277	10.721	10.7574	10.9252	10.876	9.35346	10.904	9.54026	10.59	9.50178	11.0011	10.5216	10.9333	10.9704	9.34379	9.6252	10.8145	9.85433	10.3822	10.9433	10.5753	9.81928
ILMN_1653120	7.17383	7.1042	7.21794	7.09529	7.16965	7.1446	7.19299	7.30054	7.1975	7.07224	6.64113	6.82998	6.64668	6.75712	6.7844	7.02141	6.63516	6.78294	6.76053	6.83767	6.71741	6.73371
ILMN_1653125	7.05493	7.0268	7.12074	7.03095	7.20528	7.41207	7.02736	7.32264	7.12163	7.12163	7.51677	7.14729	7.23569	7.59403	7.5481	7.07913	6.92926	7.04623	7.03351	6.98583	6.7416	7.66491
ILMN_1653127	7.07224	7.14313	7.14838	7.13476	7.08068	7.13759	7.14254	7.18634	7.14512	7.07224	6.77082	6.80502	6.71528	6.70131	6.82203	6.8288	6.72747	6.84866	6.75156	6.89742	6.74627	6.76171
ILMN_1653129	7.93628	7.93466	7.76467	7.75506	7.65775	7.51248	7.4114	7.45315	7.66301	7.5053	7.55105	7.56017	7.40599	7.52213	7.33055	7.25965	7.27158	7.15124	7.29208	7.23026	7.19761	7.03117
ILMN_1653133	7.08068	7.00578	7.20062	7.03095	7.09529	7.03737	7.11291	7.09337	7.06122	7.09154	6.60034	6.78483	6.66705	6.66594	6.70821	6.60742	6.67595	6.63538	6.69529	6.64178	6.6269	6.56609
ILMN_1653134	8.59358	8.56245	8.12976	8.46999	8.50364	9.1667	8.33812	9.33934	8.66764	9.70911	7.54926	7.45765	7.68244	7.65869	7.84968	7.8934	7.61954	8.29851	7.95356	7.78234	7.97945	8.2467
ILMN_1653142	7.02736	7.04731	7.13989	7.04793	7.05493	7.11955	7.10231	7.07099	7.14512	7.08192	6.64563	6.61112	6.60896	6.81068	6.56822	6.64923	6.69024	6.56403	6.68024	6.63772	6.66915	6.71154
ILMN_1653143	7.46409	7.32482	7.41037	7.36061	7.28789	7.19888	7.23522	7.48541	7.26406	7.13061	6.79995	7.006	6.74892	7.11744	7.09632	7.15789	7.1631	7.4511	7.08484	7.1466	7.39223	7.07247
ILMN_1653146	7.09753	7.1042	7.16498	7.07224	7.05493	7.10291	7.12163	7.1289	7.24685	7.07224	6.7887	6.84357	6.72343	6.67491	6.68496	6.81835	6.70566	6.53854	6.71396	6.70842	6.78221	6.7416
ILMN_1653150	7.07224	7.0268	7.13989	7.17642	7.17642	7.06474	7.10231	7.17383	7.12163	7.06122	6.7265	6.78662	6.6722	6.73802	6.85771	6.76533	6.689	6.75925	6.80901	6.61927	6.66915	6.75402
ILMN_1653155	7.13008	7.13293	7.08192	7.17642	7.16125	7.03737	7.11291	7.09337	7.12163	7.12163	6.81589	6.72474	6.77895	6.87306	6.81049	6.78851	6.64015	6.84353	6.76925	6.7636	6.831	6.70365
ILMN_1653158	7.05493	7.14313	7.05129	7.08956	7.09529	7.10291	7.13061	7.07099	7.1042	7.11291	6.71264	6.68221	6.80758	6.8087	6.68879	6.67606	6.7416	6.801	6.64712	6.75414	6.64519	6.7587
ILMN_1653161	6.98085	7.11444	7.2116	7.1289	7.08876	7.1289	7.13061	7.00141	7.06122	6.97873	6.80758	6.80502	6.68879	6.69261	6.89199	6.83161	6.72892	6.71439	6.72762	6.75681	6.73096	6.66008
ILMN_1653163	7.25313	7.30728	7.24582	7.2135	7.26903	7.39616	7.18215	7.58035	7.37666	7.59793	7.0549	7.08936	6.9839	7.02174	7.17131	7.22661	6.98087	7.30328	7.21149	7.30462	6.99581	7.64129
ILMN_1653165	8.1181	7.71356	7.79538	7.73777	7.84859	7.72349	7.79696	7.62181	7.80312	7.39106	7.98809	7.82154	7.66474	8.2585	7.7276	7.54285	7.78362	7.6005	7.73019	8.03817	7.88258	7.80625
ILMN_1653166	7.42517	7.53154	7.5053	7.38668	7.61871	7.20684	7.51248	7.5493	7.40368	7.38115	7.57807	7.87941	7.98705	7.55525	6.92121	7.24861	8.24157	7.20856	7.6943	7.13361	7.84943	6.95827
ILMN_1653174	7.1382	7.1042	7.04304	7.15431	7.1289	7.05656	7.23522	7.11444	7.07988	7.05001	6.79215	6.7198	6.71793	6.69751	6.90554	6.66488	6.72293	6.72715	6.71793	6.57491	6.66719	6.71154
ILMN_1653180	7.57605	7.55105	7.81711	7.79629	7.60403	7.67584	7.61159	7.50255	7.73459	7.60704	7.96107	8.02034	7.69537	8.11465	8.27532	8.16626	7.9106	7.68756	8.66184	8.18601	8.4003	8.11091
ILMN_1653182	7.13008	7.11444	7.12074	7.17642	7.1289	7.11955	7.08068	7.11444	7.11366	7.08192	6.76212	6.7071	6.78032	6.74919	6.62497	6.63247	6.63772	6.69328	6.72762	6.73576	6.6722	6.77537
ILMN_1653185	7.08068	7.13293	7.08192	7.16257	7.2135	7.08253	7.22527	7.20005	7.15344	7.09154	6.79215	7.09852	6.98047	6.89245	6.80655	7.00767	6.93716	6.96911	7.06632	6.94993	6.84773	6.91598
ILMN_1653189	7.07224	7.0857	7.15746	7.1289	7.16125	7.11955	7.24685	7.22877	7.1042	7.11291	6.63376	6.7416	6.70832	6.68124	6.6745	7.15505	6.79747	6.62664	6.76435	6.80304	6.79444	6.72092
ILMN_1653193	7.08068	7.13293	7.08192	7.14254	7.1042	7.16257	7.09031	7.1289	7.08956	7.05001	6.65418	6.67251	6.62886	6.71519	6.60018	6.52285	6.62481	6.64613	6.7376	6.67002	6.64356	6.65004
ILMN_1653198	7.04582	7.18835	7.14838	7.15098	7.04582	7.03737	7.08068	7.18634	7.14512	7.06122	6.73371	6.7416	6.7416	6.69895	6.72111	6.78158	6.75388	6.6512	6.72485	6.70089	6.71559	6.76448
ILMN_1653200	7.15292	7.0762	7.17383	7.08192	7.04582	7.11222	7.22527	7.20005	7.15344	7.16257	6.85144	6.75088	6.79778	6.79246	6.98429	6.71376	6.72892	6.81478	6.85273	7.01207	6.68044	6.83189
ILMN_1653202	7.07224	7.09467	7.12074	7.03095	7.08068	7.17141	6.95924	7.04731	7.00726	7.06122	6.71154	6.75553	6.67595	6.47673	6.56663	6.77063	6.7324	6.72212	6.65004	6.56527	6.63689	6.69886
ILMN_1653203	7.37666	7.3484	7.25313	7.34647	7.41207	7.47199	7.32783	7.60866	7.34952	7.28643	7.09453	7.97487	7.92323	7.0169	6.95649	7.4301	7.36599	7.49566	7.09818	6.84693	7.37224	6.95827
ILMN_1653205	9.00383	8.69548	8.89686	9.0458	9.19132	8.70744	8.95915	8.47704	8.97602	9.07802	7.47053	7.27363	7.29273	7.09639	7.20109	7.36301	7.40948	7.36877	7.40596	7.50469	7.64903	7.42119
ILMN_1653207	7.09031	7.12436	7.09154	7.18952	7.05493	7.07347	7.14254	7.38115	7.22364	7.25947	6.83969	6.84513	6.77178	6.78474	6.73662	6.83453	6.689	6.77546	6.78609	6.7416	6.71396	6.73074
ILMN_1653209	7.15292	7.13293	7.11222	7.07224	7.08876	7.06474	7.17273	7.09337	7.13872	7.06122	6.75414	6.63139	6.69945	6.80428	6.668	6.85968	6.59662	6.65809	6.75156	6.82915	6.63516	6.73685
ILMN_1653211	7.11366	7.12436	7.14838	7.06474	7.11291	7.11222	7.08068	7.26357	7.16965	7.16257	6.77865	6.74776	6.79227	6.81375	6.80407	6.8487	6.86966	6.83189	6.89307	6.77778	6.81589	6.68059
ILMN_1653220	9.5044	10.4187	10.5658	10.0457	10.4696	11.7371	10.473	10.774	10.0754	11.2818	10.1973	9.94098	10.5807	10.1083	10.2739	10.8645	10.0772	10.4225	10.5395	10.4903	10.4903	11.1576
ILMN_1653228	7.17383	7.14313	7.16498	7.22998	7.09529	7.1446	7.09031	7.40157	7.11366	7.12163	7.04829	6.80502	6.82875	6.8087	6.82846	6.77188	6.76308	6.66636	6.78149	7.0007	6.831	6.82592
ILMN_1653240	7.1042	7.04731	7.19138	7.20171	7.1446	7.13759	7.13061	7.04731	7.08956	7.09154	6.56111	6.66099	6.87236	6.74776	6.64712	6.70243	6.71538	6.74647	6.74905	6.8127	6.62356	6.66008
ILMN_1653251	7.06249	7.0857	7.18215	7.13476	7.1289	7.15344	7.16257	7.05986	7.02617	7.06122	6.74528	6.73371	6.62757	6.76053	6.81299	6.78986	7.02309	6.76426	6.75156	6.70222	6.70742	6.72092
ILMN_1653263	6.97138	7.14313	7.04304	7.1289	7.11291	7.18952	7.13061	7.07099	7.03531	7.06122	6.63376	6.68059	6.69261	6.8127	6.66936	6.76298	6.66572	6.64063	6.80655	6.67627	6.6722	6.75553
ILMN_1653266	7.99246	7.66014	7.67244	7.62302	7.54148	8.08559	7.86677	7.9419	7.54585	8.28432	6.93904	6.86474	6.77546	6.81578	7.18249	6.99295	6.76905	6.98691	6.96371	6.879	6.96077	7.24424
ILMN_1653267	7.11366	7.05656	7.12074	7.1042	7.17642	7.08253	7.03737	7.16257	7.03531	6.99878	6.8127	6.82846	6.7165	6.66842	6.73802	6.85004	6.7429	6.70066	6.74647	6.88655	7.0081	6.94993
ILMN_1653274	7.04582	7.1042	7.06249	7.20171	7.00077	7.02807	7.07018	7.00141	7.09674	7.11291	6.67731	6.70078	6.6603	6.61016	6.79952	6.74419	6.67957	6.72605	6.72353	6.85004	6.69271	6.63399
ILMN_1653276	7.13008	7.0762	7.09154	7.08956	7.11291	7.01894	7.10231	7.07099	7.06122	7.01894	6.78275	6.64634	6.68745	6.83857	6.7938	6.85004	6.76905	6.84109	6.60089	6.78986	6.77642	6.71641
ILMN_1653278	7.22364	7.16965	7.15746	7.13476	7.28375	7.1289	7.18215	7.32264	7.24685	7.06122	6.7553	6.75088	6.90327	6.91348	6.6979	6.8487	6.73371	6.84612	6.82428	6.79101	6.79588	6.72605
ILMN_1653282	7.12163	7.0857	7.04304	7.07224	7.1382	7.15344	7.11291	7.17383	6.99798	7.02964	6.83857	6.61276	6.8776	6.79778	6.74905	6.83597	6.70003	6.81835	6.814	6.73814	6.75367	6.79246
ILMN_1653283	7.13008	7.09467	7.13989	7.19579	7.19888	7.03737	7.15232	7.41931	7.1042	7.07224	6.59818	7.00404	6.82632	6.9476	6.93752	6.80975	6.97372	6.86927	6.89742	6.86474	6.89853	6.99561
ILMN_1653286	7.12163	7.09467	7.03236	7.12074	7.08068	7.17141	7.05986	7.20005	7.08956	7.2135	6.62627	6.72944	6.70089	6.74919	6.69261	6.90219	6.68568	6.64613	6.65004	6.7636	6.62176	6.57147
ILMN_1653292	10.0736	10.0135	9.65702	10.1279	9.9963	10.0506	10.0769	9.76764	10.2853	9.67602	9.57122	10.2786	9.98937	9.67848	10.8232	9.66151	9.74974	9.53365	9.16774	9.07957	9.40692	9.63567
ILMN_1653310	7.09753	6.97359	7.10231	7.08956	7.11291	7.08253	7.20347	7.16257	7.1042	7.009	6.74991	6.94312	6.88401	6.76053	6.87133	6.73491	6.94416	6.93473	6.83475	6.79631	6.87255	6.78545
ILMN_1653314	7.09753	7.16125	7.04304	7.13476	7.23472	7.07347	7.20347	7.1289	7.16184	7.10291	6.73706	6.6642	6.72923	6.71396	6.77188	6.84463	6.71186	6.78806	6.68579	6.72485	6.70586	6.77823
ILMN_1653319	7.16819	7.12436	7.18215	7.15431	7.2193	7.26664	7.19299	7.20005	7.16184	7.17141	7.15486	6.93303	6.83615	6.99998	7.15421	7.08807	7.16058	7.04623	6.81511	6.92679	7.08848	6.9566
ILMN_1653324	7.17383	7.0268	7.11222	7.04793	7.03737	7.06474	7.03737	7.15174	7.16965	7.03871	6.70222	6.68735	6.74419	6.71044	6.73401	6.6147	6.8438	6.81138	6.6679	6.63936	6.80758	6.68226
ILMN_1653332	7.13008	7.15232	7.12074	7.11291	7.00077	7.1446	6.95924	7.05986	7.07099	7.09154	6.81492	6.85622	6.74419	6.64134	6.69261	6.68484	6.62481	6.7949	6.7071	6.66742	6.72781	6.88722
ILMN_1653337	7.04582	7.12436	7.16498	7.2135	7.07099	7.11955	7.02736	7.1382	7.07988	7.10291	6.72212	6.7324	6.76308	6.88331	6.99762	6.9403	6.81407	6.78294	6.75669	6.73226	6.70742	6.78264
ILMN_1653340	7.16819	7.13293	7.10231	7.09529	7.12074	7.09276	7.24685	7.08192	7.16965	7.06122	6.88944	6.79726	6.75967	6.72243	6.68071	6.66216	6.65418	6.62517	6.7324	6.76468	6.77778	6.74419
ILMN_1653342	7.52025	7.61013	7.64716	7.63752	7.77418	8.47785	7.68932	7.9715	7.51629	7.95878	8.2905	8.18601	8.12741	8.4043	8.23638	8.74543	7.99701	8.19101	8.44829	8.44889	7.97659	8.67185
ILMN_1653347	7.16073	7.14313	7.11222	7.20684	7.04582	7.16257	7.09031	7.17383	7.13008	7.10291	6.75414	6.79266	6.84392	6.77188	6.69126	6.79121	6.81977	6.74399	6.67356	6.67909	6.67062	6.77992
ILMN_1653352	7.05493	7.11444	7.21794	7.09529	7.11291	7.16257	7.05986	7.09337	7.03531	7.08192	6.77865	6.7416	6.78158	6.73802	6.86584	6.78705	6.71538	6.90834	6.80776	6.72222	6.79588	6.76797
ILMN_1653355	7.21794	7.22762	7.23522	7.20684	7.20528	7.22762	7.23522	7.45315	7.17642	7.2042	6.85868	7.00404	6.90327	6.73802	6.96121	7.01128	6.97177	6.80377	6.84612	6.78841	7.04841	6.77823
ILMN_1653358	7.08068	7.09467	7.16498	7.07224	7.15344	7.11955	7.11291	7.18634	7.01607	7.05001	6.95458	6.87518	6.61916	6.63376	6.73956	6.8487	6.67595	6.86376	6.91555	6.92494	6.66543	6.76171
ILMN_1653367	8.86939	8.66181	8.87415	8.88178	9.00169	7.84216	8.55655	8.06715	8.98841	8.11641	8.71188	8.70461	8.72547	8.88429	8.37245	7.68756	8.74891	8.43217	8.34645	8.88463	8.5564	8.4604
ILMN_1653368	7.12163	7.12436	7.09154	7.16965	7.07099	7.16257	7.11291	7.07099	7.04526	7.07224	6.73123	6.79121	6.89742	6.71044	6.7883	6.81967	6.801	6.72857	6.77063	6.73346	6.8246	6.75059
ILMN_1653369	7.09031	7.05656	7.15746	7.15098	7.05493	7.08253	7.00642	7.02528	7.08956	7.03871	6.52444	6.6448	6.62999	6.56244	6.60018	6.53947	6.57237	6.55631	6.55147	6.50044	6.70433	6.57147
ILMN_1653372	7.11366	7.20471	7.13008	7.15098	7.08876	7.13759	7.2135	7.17383	7.04526	7.13061	6.90824	6.81147	6.74419	6.82377	6.73123	6.63689	6.68787	6.88722	6.82305	6.88916	6.80045	6.71489
ILMN_1653376	7.02736	7.18835	7.12074	7.1042	7.07099	7.15344	7.05986	7.1289	7.12163	7.02964	6.70942	6.6991	6.77063	6.86203	6.95486	6.71793	7.03701	6.70699	6.64005	6.73696	6.89701	6.96784
ILMN_1653378	7.1382	7.15232	7.08192	7.08192	7.00822	7.10291	7.09031	7.08192	7.13872	7.10291	6.73836	6.55686	6.65926	6.65683	6.5493	6.56822	6.66705	6.68529	6.56968	6.66594	6.59628	6.79404
ILMN_1653385	7.09031	6.93046	7.02231	7.09529	7.04582	7.07347	7.09031	7.07099	7.13872	7.07224	6.63855	6.65799	6.59662	6.66594	6.75286	6.50932	6.61573	6.54083	6.71793	6.51873	6.58067	6.65004
ILMN_1653386	7.23522	7.25686	7.18215	7.16965	7.1446	7.1446	7.14254	7.22877	7.21211	7.16257	6.8127	6.80189	6.88712	6.72243	6.84253	6.88145	6.82447	6.7553	6.77432	6.81805	6.74627	6.76171
ILMN_1653390	7.09753	7.14313	7.19138	7.08956	7.1382	7.07347	7.20347	7.2135	7.2042	7.06122	6.9055	6.67893	6.82416	6.8246	6.99892	6.82612	6.7311	7.14765	6.65418	6.7616	6.8116	6.79246
ILMN_1653394	7.24685	7.16965	7.33868	7.2135	7.27701	7.18952	7.26855	7.62181	7.2294	7.24861	6.95631	6.98003	6.85502	7.04528	7.01523	7.19951	6.95975	7.09045	6.8418	6.90997	6.88331	7.05841
ILMN_1653395	7.09753	7.00578	7.03236	7.03095	7.07099	7.17141	7.08068	7.04731	7.01607	7.14066	6.66683	6.59662	6.77895	6.70243	6.62908	6.60142	6.80446	6.6826	6.64005	6.73966	6.67877	6.65304
ILMN_1653404	8.07779	7.64546	7.91983	8.10236	7.95084	8.44811	7.88009	8.02157	7.9504	8.20118	8.7286	8.34964	8.50856	8.4466	9.32326	8.79177	8.33448	8.44607	8.66251	8.8887	8.67491	9.15718
ILMN_1653410	7.13008	7.15232	7.15746	7.1042	7.19888	7.06474	7.19299	7.11444	7.05266	7.19299	6.79329	6.7429	6.82051	6.89348	6.8726	6.67762	6.8438	6.89469	6.77305	6.66468	6.84492	6.73371
ILMN_1653412	7.73459	7.49467	7.58035	7.5053	7.55594	7.91579	7.641	7.75239	7.64995	7.72559	7.10695	6.98484	7.09619	6.95847	6.94034	6.81128	6.90421	6.82947	6.90542	6.87203	6.97979	6.98484
ILMN_1653415	7.12163	7.11444	7.10231	7.15431	7.1446	7.11955	7.08068	7.04731	7.04526	7.02964	6.64563	6.78986	6.73142	6.73576	6.75904	6.70243	6.84253	6.7399	6.70842	6.548	6.61611	6.78264
ILMN_1653420	7.06249	7.12436	7.03236	7.09529	7.12074	7.25796	7.02736	7.11444	7.1042	7.06122	6.61158	6.65137	6.68113	6.66946	6.72892	6.72762	6.58938	6.76542	6.66385	6.65028	6.61276	6.77072
ILMN_1653428	7.1042	7.20471	7.08192	7.13476	7.23982	7.10291	7.13061	7.17383	7.15344	7.13061	6.86954	6.73096	6.79558	6.65809	6.73401	6.7587	6.72293	6.75787	6.81147	6.70965	6.65237	6.82428
ILMN_1653429	7.98476	7.65413	7.69031	7.8944	7.85929	8.21412	7.91597	8.26102	7.77517	8.24695	7.39011	7.20882	7.21616	7.41121	7.65076	7.57933	7.30766	7.30724	7.29304	7.56328	7.34346	7.60222
ILMN_1653432	8.46141	8.08955	8.06601	7.84254	8.34597	8.11845	8.36797	8.08529	8.17309	8.02355	8.22938	8.55942	8.30503	8.42051	8.18414	8.14103	8.83321	8.3723	8.3087	7.80149	8.56404	7.46089
ILMN_1653434	7.1042	7.14313	7.13989	7.1289	7.09529	7.03737	7.09031	7.1289	7.07099	7.12163	6.79995	6.73706	6.90613	6.81478	6.84923	6.75059	6.92728	6.80377	6.80313	6.88559	6.75516	6.76009
ILMN_1653437	7.13008	7.13293	7.05129	7.08192	7.03737	7.01894	7.08068	7.16257	7.07988	7.15232	6.55925	6.63656	6.65028	6.59214	6.59191	6.61351	6.63376	6.65809	6.55631	6.64346	6.73096	6.53506
ILMN_1653438	7.3806	7.3484	7.18215	7.24039	7.22706	7.09276	7.16257	7.02528	7.16184	7.15232	6.60801	6.66099	6.76435	6.70376	6.75034	6.68765	6.72747	6.70566	6.82793	6.68044	6.69271	6.7429
ILMN_1653443	7.29482	7.18835	7.19138	7.20684	7.26406	7.27801	7.16257	7.28257	7.25313	7.44053	7.17449	7.17176	7.01835	7.02423	7.51113	7.38799	7.2879	7.10609	7.30413	6.97809	7.1878	7.32456
ILMN_1653447	7.18691	7.0762	7.01218	7.08192	7.17642	7.04793	7.20347	7.20005	7.14512	7.09154	6.76094	6.68059	6.86759	6.76426	6.7416	6.91288	6.8117	6.83462	6.86713	6.68652	6.78545	6.87823
ILMN_1653453	7.1382	7.0168	7.06249	7.04793	7.08876	7.06474	6.98337	7.03675	6.9704	6.98847	6.51337	6.79121	6.66705	6.5639	6.68745	6.73861	6.76552	6.66763	6.71925	6.67251	6.54994	6.70043
ILMN_1653458	7.12163	7.0762	7.01218	7.11291	7.05493	7.06474	6.99577	7.08192	7.07099	7.03871	6.66189	6.59022	6.61276	6.60132	6.74905	6.6204	6.64923	6.62942	6.50278	6.60199	6.57481	6.60873
ILMN_1653459	7.1382	7.1042	7.15746	7.038	7.11291	7.23667	7.10231	7.18634	7.16965	7.08192	6.78389	6.62822	6.77296	6.71154	6.68496	6.83731	6.7883	6.77063	6.72485	6.66216	6.74776	6.64827
ILMN_1653461	7.12163	7.0857	7.08192	7.16257	7.12074	7.07347	6.99577	7.15174	7.07988	7.08192	6.80313	6.77895	6.85968	6.65166	6.78294	6.6889	6.83857	6.76807	6.92728	6.92774	6.70232	6.70689
ILMN_1653463	7.07224	7.00578	7.04304	7.09529	7.1042	7.0109	7.04793	7.28257	7.12163	7.07224	6.80655	6.82998	6.7165	6.77315	6.82705	6.7039	6.69024	6.82447	6.78609	6.67002	6.73696	6.71154
ILMN_1653466	8.36209	8.11335	8.37657	8.34991	8.40011	9.33183	7.89934	10.1371	8.23753	9.2887	9.20029	8.16438	8.75597	8.59562	8.18414	10.1916	8.71221	10.1502	8.88747	8.16984	8.937	11.0537
ILMN_1653468	7.09031	7.0762	7.13989	7.2193	7.1289	7.07347	7.13061	7.08192	7.1042	7.08192	6.76669	6.93097	6.74776	6.69751	6.72616	6.81681	6.79995	6.62143	6.80776	6.77664	6.75806	6.72443
ILMN_1653469	11.6687	12.2306	12.165	11.922	12.4008	12.0288	11.9572	12.1704	12.0288	12.1391	12.0221	12.0643	12.0995	11.912	12.0001	11.7961	12.1048	12.3425	12.1287	12.1432	11.9835	12.1861
ILMN_1653470	7.1042	7.17898	7.07224	7.07224	7.08876	7.10291	7.09031	7.11444	7.00726	7.11291	6.58794	6.58283	6.75444	6.66719	6.6448	6.6204	6.58805	6.63139	6.79871	6.73576	6.51478	6.62133
ILMN_1653471	7.13008	7.11444	7.14838	7.11291	7.1382	7.23667	7.14254	7.1042	7.11366	7.17141	6.70089	6.7651	6.72111	6.71276	6.8438	6.68765	6.78362	6.7197	6.70053	6.66594	6.74776	6.79995
ILMN_1653480	7.19385	7.16965	7.26229	7.32482	7.23472	7.25796	7.20347	7.24582	7.23522	7.09154	6.92552	6.78986	6.85968	6.88145	6.92121	6.76009	7.05935	6.78806	6.76308	6.99026	6.92813	6.93321
ILMN_1653494	7.27602	7.06611	7.17383	7.24039	7.22706	7.19888	7.19299	7.17383	7.13008	7.31076	6.99045	6.90402	6.74647	6.99544	7.04277	6.71641	6.96371	6.9677	7.00802	6.66468	6.79747	6.79847
ILMN_1653496	7.20005	7.16965	7.20062	7.2135	7.09529	7.11222	7.17273	7.18634	7.21211	7.11291	6.92471	6.7776	6.93631	6.84704	6.78041	6.72343	6.79529	6.79255	6.89577	6.83331	6.78545	6.73685
ILMN_1653498	10.101	9.48828	9.74661	9.62498	9.45909	8.15907	9.31542	7.99246	9.46627	8.25959	9.52034	10.1226	9.57893	9.98724	8.38289	9.26294	9.98724	8.64338	9.50175	10.1372	10.1664	8.10928
ILMN_1653500	7.11366	7.09467	7.21794	7.038	7.08876	7.03737	7.23522	7.05986	7.1042	7.03871	6.67947	6.7385	6.73521	6.67617	6.67947	6.65523	6.72167	6.83597	6.84733	6.76573	6.65723	6.70965
ILMN_1653501	7.16819	7.15232	7.04304	7.08192	6.99048	7.02807	7.14254	7.17383	7.06122	7.13061	6.79215	6.81283	6.75563	6.84501	6.86966	6.86713	7.03117	6.86633	6.76925	6.73226	6.83221	6.72762
ILMN_1653504	7.03737	7.28103	7.20062	7.08192	7.1446	7.63216	7.17273	7.2135	7.07988	7.16257	6.7688	6.62329	6.66594	6.77652	6.8332	6.75197	6.79165	6.801	6.99744	6.75681	6.83756	6.76448
ILMN_1653506	7.1042	7.0857	7.13008	7.11291	7.16125	7.10291	7.15232	7.18634	7.12163	7.12163	6.68664	6.79404	6.74419	6.66477	6.80798	6.83453	6.69271	6.85106	6.88019	6.76468	6.71075	6.66008
ILMN_1653514	7.35492	7.41889	7.43463	7.39756	7.4395	7.66301	7.50507	7.62181	7.41289	7.53982	7.08901	7.36867	7.26814	7.19963	7.11912	7.35386	7.1467	7.40693	7.33912	7.11839	7.37583	7.22776
ILMN_1653524	7.04582	7.06611	7.08192	7.13476	7.06249	7.07347	7.14254	7.09337	7.24039	7.12163	6.77082	6.67084	6.7165	6.66216	6.74776	6.88741	6.97057	6.67187	6.91282	6.73446	6.80879	6.83969
ILMN_1653527	7.09031	7.04731	7.13989	7.06474	7.1289	7.06474	7.05986	7.07099	7.18215	7.09154	6.70089	6.85144	6.82051	6.87506	6.94164	6.77315	6.81516	6.75787	6.71925	6.77305	6.7668	6.86079
ILMN_1653529	7.61763	7.88675	7.69031	7.56793	7.74746	7.25796	7.82738	7.16257	7.57241	7.46976	7.30936	7.52898	7.3284	7.29304	7.26143	7.16895	7.23828	7.0074	7.13892	7.05969	7.18485	7.05004
ILMN_1653553	7.44914	7.54148	7.57037	7.52521	7.3591	7.5986	7.49771	7.41931	7.68518	7.34697	7.33925	8.48922	8.33891	7.35706	7.17945	8.35079	8.43733	7.39888	7.81079	7.29955	7.50636	6.93482
ILMN_1653562	7.1042	7.0857	7.06249	7.08956	7.07099	7.04793	7.03737	7.08192	7.05266	7.009	6.63738	6.67251	6.71065	6.5907	6.63726	6.73861	6.66326	6.77778	6.65672	6.70586	6.5907	6.86661
ILMN_1653566	7.06249	7.0762	7.01218	7.08192	7.08876	7.06474	7.02736	7.00141	7.07988	7.16257	6.71154	6.63337	6.57373	6.6129	6.68226	6.65936	6.55711	6.59214	6.70577	6.57062	6.59628	6.81987
ILMN_1653567	7.08068	7.04731	7.12074	7.1042	7.07099	7.09276	7.08068	7.04731	7.02617	7.08192	6.7324	6.89597	6.69126	6.72243	6.81435	6.85004	6.60509	6.70211	6.74647	6.86731	6.74301	6.65004
ILMN_1653572	7.09031	7.11444	7.02231	6.98912	7.08876	7.15344	7.08068	7.04731	7.01607	7.02964	6.79329	6.55268	6.66819	6.65556	6.75286	6.63247	6.6642	6.7938	6.7887	6.72747	6.73096	6.64305
ILMN_1653573	7.16819	7.16965	7.09154	7.07224	7.11291	7.08253	7.11291	7.15174	7.1042	7.10291	6.78986	6.91098	6.73391	6.7311	6.7416	6.74419	6.7586	6.75787	6.85163	6.78841	6.78705	6.8127
ILMN_1653575	7.11366	7.16125	7.13008	7.14254	7.1446	7.06474	7.09031	7.09337	7.15344	7.2983	6.89218	6.70078	6.94667	6.77315	6.75034	6.76797	6.89159	6.88331	6.6979	6.85802	6.77778	6.82264
ILMN_1653577	7.1382	7.00578	6.969	7.08956	7.07099	7.06474	7.11291	7.24582	7.07099	7.10291	6.6679	6.67575	6.66705	6.74419	6.68745	6.62176	6.67832	6.56145	6.69677	6.64646	6.64356	6.70965
ILMN_1653578	7.16819	7.17898	7.06249	7.1289	7.12074	7.1446	7.10231	7.2135	7.18215	7.16257	6.73123	6.71186	6.74892	6.68765	6.66008	6.79279	6.69529	6.74647	6.801	6.83017	6.7913	6.79246
ILMN_1653579	7.03737	7.05656	7.03236	7.14254	7.07099	7.11955	7.07018	7.15174	7.08956	7.19299	6.63129	6.60285	6.66819	6.60634	6.72485	6.6147	6.57749	6.56822	6.76053	6.68394	6.68361	6.64123
ILMN_1653583	7.1042	7.0762	7.05129	7.08192	7.06249	7.09276	7.05986	7.11444	7.13008	7.08192	6.65534	6.65458	6.74419	6.66477	6.75142	6.63387	6.67832	6.59639	6.64892	6.70586	6.68848	6.73521
ILMN_1653591	7.11366	7.03737	7.08192	7.05656	6.96389	7.18952	7.02736	7.01218	7.01607	7.06122	6.68206	6.65799	6.76308	6.67757	6.82203	6.81835	6.78955	6.90719	6.80655	6.87282	6.8246	6.73226
ILMN_1653599	10.579	10.9403	11.4453	10.8678	11.0565	11.3422	11.074	11.1681	10.77	11.1541	11.0242	10.7436	11.0433	11.3176	10.9433	11.3228	10.9054	11.079	11.3751	11.276	11.1517	11.488
ILMN_1653601	7.18215	7.0168	7.20062	7.14254	7.09529	7.16257	7.10231	7.24582	7.13872	7.22527	6.84501	6.60787	6.76669	6.93097	6.84773	6.84602	6.79279	7.02349	6.91555	6.96068	6.7913	6.91904
ILMN_1653603	7.06249	7.06611	7.09154	7.1289	6.91406	7.06474	7.07018	7.1042	7.06122	7.10291	6.83857	6.72781	6.64668	6.67757	6.91282	6.67481	6.77315	6.7868	6.70211	6.69553	6.83475	6.77675
ILMN_1653607	7.08068	7.16965	7.04304	7.15431	7.12074	7.00197	7.11291	7.1042	7.19024	7.14066	6.72212	6.71352	6.78515	6.79881	6.69529	6.65672	6.69886	6.66099	6.6722	6.85997	6.81589	6.74919
ILMN_1653612	7.35009	7.40422	7.36005	7.33868	7.26406	7.25796	7.33868	7.53298	7.35492	7.41164	7.20408	7.13595	7.0521	6.96397	7.10251	6.98808	6.85661	6.98566	7.02848	7.07913	7.02727	7.30788
ILMN_1653613	7.3806	7.38668	7.33868	7.18952	7.26903	7.26664	7.36704	7.36061	7.34952	7.23584	7.36695	7.13992	7.27137	7.40624	6.96631	6.92613	7.27637	7.07186	7.16692	7.36203	7.1878	6.94358
ILMN_1653615	7.07224	7.03737	7.01218	6.98085	7.16125	7.03737	7.05986	7.30054	7.03531	7.03871	6.65534	6.7198	6.78986	6.69518	6.70043	6.83161	6.79995	6.78909	6.75414	6.82714	6.67595	6.50184
ILMN_1653618	7.71314	7.93127	7.80604	7.81531	7.89186	7.65672	7.89934	7.5493	7.97662	7.68728	7.41479	7.20725	7.37766	7.60255	7.40465	7.69113	7.56355	7.17636	7.30896	7.52845	7.32573	7.22115
ILMN_1653622	7.09031	7.00578	7.09154	7.19579	7.1289	7.16257	7.07018	7.02528	7.16184	7.09154	6.66189	6.75088	6.72004	6.83311	6.78041	6.7429	6.72485	6.7197	6.77305	6.71352	6.9889	6.66915
ILMN_1653628	7.08068	7.09467	7.10231	7.15431	7.06249	7.06474	7.05986	7.05986	7.15344	7.12163	6.73966	6.70222	6.66819	6.64134	6.66572	6.63387	6.65936	6.76936	6.71264	6.92594	6.58503	6.71641
ILMN_1653636	6.99048	7.05656	7.07224	7.00726	6.99048	7.06474	7.14254	7.1042	7.09674	7.03871	6.7429	6.73555	6.6973	6.67246	6.64217	6.62356	6.64144	6.6826	6.72892	6.64774	6.72045	6.7196
ILMN_1653646	7.45907	7.46976	7.76467	7.58741	7.51629	7.33726	7.62582	7.73777	7.84947	7.37027	7.69649	7.95368	7.92498	7.59845	7.7276	7.92019	7.87558	8.12205	8.0608	7.5185	7.74349	7.6836
ILMN_1653648	7.09031	7.12436	7.17383	7.1289	7.08876	6.98085	7.15232	7.24582	7.1042	7.05001	6.77082	6.70566	6.77778	6.74776	6.7324	6.72343	6.67595	6.70821	6.65142	6.69158	6.79881	6.73226
ILMN_1653650	7.21211	7.12436	7.00141	7.22998	7.1042	7.1804	7.19299	7.17383	7.09674	7.06122	6.76308	6.72312	6.86387	6.69618	6.69126	6.7401	6.668	6.79121	6.75925	6.74548	6.70742	6.58938
ILMN_1653652	8.2157	7.40422	7.58035	7.53249	7.35285	7.32783	7.72873	7.50255	8.07082	7.73225	7.39232	8.61366	7.29596	7.85786	7.74296	7.33935	7.94704	7.53616	7.65076	8.02446	7.59548	7.49713
ILMN_1653660	7.03737	7.1042	7.12074	7.06474	7.03737	7.08253	7.05986	7.1289	7.16965	7.16257	6.70942	6.69564	6.81237	6.72485	6.64217	6.63855	6.70566	6.64063	6.64712	6.73446	6.70433	6.81138
ILMN_1653665	7.08068	7.04731	7.08192	7.03095	6.99048	7.17141	7.11291	7.28257	7.1042	7.10291	6.61916	6.56822	6.7583	6.71772	6.77188	6.6147	6.60264	6.72474	6.61752	6.62058	6.53947	6.58526
ILMN_1653666	7.02736	7.09467	7.14838	7.16257	7.2135	7.28789	7.20347	7.2135	7.09674	7.2135	6.78986	6.58102	6.79881	6.80758	6.87846	6.89742	6.80798	6.87162	6.73642	6.80086	6.74905	6.99748
ILMN_1653667	7.16073	7.27602	7.13008	7.17642	7.08876	7.20684	7.26855	7.1042	7.2294	7.14066	6.86462	6.77129	6.88401	6.81478	6.76669	6.73052	6.64679	6.84733	6.70965	6.79871	6.62176	6.80437
ILMN_1653670	7.21794	7.14313	7.24582	7.11291	7.1289	7.05656	7.11291	7.1042	7.13008	7.11291	6.6226	6.6642	6.78032	6.72134	6.70699	6.79569	6.69751	6.70211	6.75259	6.76468	6.8246	6.71641
ILMN_1653678	7.00822	7.1042	7.05129	7.11291	7.07099	7.10291	7.23522	7.17383	7.11366	7.2983	6.72212	6.76009	6.70345	6.64795	6.69394	6.70566	6.64679	6.7429	6.68869	6.67376	6.63689	6.64679
ILMN_1653687	7.13008	7.03737	7.02231	7.1042	7.2193	7.17141	7.05986	7.08192	7.06122	7.19299	6.65672	6.7385	6.72004	6.62356	6.57087	6.76415	6.7405	6.63405	6.62497	6.76828	6.77441	6.70365
ILMN_1653704	7.02736	7.0762	7.13989	7.07224	7.07099	7.02807	7.11291	7.07099	7.13872	7.09154	6.57383	6.4664	6.62002	6.6129	6.5305	6.64519	6.57237	6.50458	6.65534	6.60884	6.49501	6.72762
ILMN_1653708	10.0319	9.72877	9.88376	9.67349	9.71507	9.89195	9.87251	9.8574	9.74059	9.70571	10.1133	10.1581	9.9683	9.71821	9.2526	9.88906	10.1214	10.0086	10.2551	10.0669	10.4656	9.88719
ILMN_1653709	7.70821	7.77418	7.68118	7.7512	7.78722	7.85929	7.58825	7.76614	7.62181	7.99828	8.25511	7.66453	7.57399	8.19878	8.02957	7.71641	7.65814	7.91965	8.0304	8.14531	8.03803	8.31508
ILMN_1653711	8.22961	8.26745	8.22877	8.03681	8.04265	7.77268	8.15683	8.03042	7.98038	7.57447	7.81616	8.38745	8.05822	7.71787	7.7118	7.28217	7.8348	7.93118	7.85747	7.36301	7.42323	7.83069
ILMN_1653712	7.83031	8.70312	7.79127	8.20531	8.04265	10.0664	7.47899	8.42819	7.67244	9.3503	8.325	7.92289	8.69199	8.46678	7.57303	9.51111	7.1882	8.8895	8.10752	8.27219	8.21138	8.52214
ILMN_1653716	7.06249	7.0857	7.16498	7.03095	6.98085	7.16257	7.01743	7.08192	7.02617	7.05001	6.65418	6.62329	6.56031	6.80975	6.55897	6.49363	6.72485	6.58404	6.6722	6.6045	6.57481	6.89505
ILMN_1653718	8.01168	8.08213	8.63467	8.41025	8.37962	8.70618	8.42292	8.84394	8.19283	8.60544	8.39601	8.77852	8.52863	8.36394	8.78021	8.44981	8.72665	8.85223	8.73299	8.63886	8.7251	8.64773
ILMN_1653719	7.1382	7.0762	7.11222	7.1042	7.07099	7.01894	7.10231	7.03675	7.12163	7.14066	6.67947	6.92104	6.85968	6.83394	6.75286	6.85968	6.77432	6.68937	6.76542	6.73696	6.73096	6.71793
ILMN_1653724	7.18215	7.16125	7.01218	7.07224	7.1042	7.22762	7.05986	7.05986	7.13008	7.09154	6.67371	6.67893	6.67481	6.64252	6.66695	6.76298	6.74548	6.8741	6.62647	6.71606	6.63198	6.7416
ILMN_1653728	7.22877	7.24861	7.16498	7.28583	7.23982	7.13759	7.25796	7.34183	7.2294	7.2983	6.87823	7.05418	6.82051	6.76426	6.96928	7.18387	6.93587	7.05765	6.93678	6.80086	6.9177	6.90439
ILMN_1653730	7.16819	7.12436	7.12074	7.1042	7.18215	7.19888	7.23522	7.08192	7.13008	7.16257	6.7859	6.8332	7.07628	6.77072	7.03301	6.84713	7.02996	7.02491	6.89199	6.98413	6.93582	6.93482
ILMN_1653738	7.17383	7.17898	7.14838	7.20171	7.02736	7.10291	7.05986	7.01218	7.21794	7.11291	6.74776	6.96121	6.70454	6.73911	6.75142	6.62507	6.77796	6.64902	6.64005	6.65418	6.70586	6.80437
ILMN_1653742	7.09753	7.14313	7.06249	7.16257	7.16125	7.18952	7.12163	7.09337	7.14512	7.13061	6.69631	6.79121	6.66594	6.81702	6.64584	6.62507	6.73605	6.66915	6.78756	6.70365	6.73096	6.72605
ILMN_1653744	6.99878	6.97359	6.9406	7.06474	7.03737	6.95396	7.03737	6.98847	7.07988	7.07224	6.70355	6.61978	6.68745	6.55109	6.63726	6.58805	6.61193	6.61883	6.8268	6.54333	6.60742	6.59468
ILMN_1653745	7.1042	7.04731	7.06249	7.06474	7.08876	7.08253	7.19299	7.09337	7.1042	7.08192	6.57515	6.99517	6.72791	6.80541	6.72364	6.71376	6.71672	6.67291	6.77178	6.7429	6.59444	6.65004
ILMN_1653748	7.04582	7.1042	7.13989	7.05656	7.08876	7.02807	7.17273	7.15174	7.07099	7.13061	6.55925	6.58649	6.55516	6.60386	6.62215	6.55257	6.67721	6.67051	6.62952	6.63936	6.63855	6.662
ILMN_1653750	7.05493	7.05656	7.20062	7.1042	7.00822	7.11955	7.09031	7.16257	7.06122	7.10291	6.68664	6.69742	7.24239	6.77315	6.80798	6.77602	6.7311	6.7868	6.76308	6.70089	6.84071	6.76308
ILMN_1653760	7.04582	7.0268	7.2116	7.1042	7.12074	7.18952	7.18215	7.11444	7.05266	7.01894	6.70089	6.66926	6.67084	6.63129	6.59444	6.69405	6.79165	6.57095	6.66226	6.7197	6.82622	6.63598
ILMN_1653761	7.03737	7.03737	6.98085	7.09529	6.99048	7.11222	7.17273	6.94122	7.09674	7.17141	6.65672	6.56822	6.81237	6.71991	6.82579	6.96112	6.81977	6.71559	6.79246	6.85891	6.82194	6.65304
ILMN_1653762	7.15292	7.0268	7.13989	7.08956	7.16965	7.08253	7.11291	7.05986	7.18215	7.06122	6.77315	6.67575	6.72605	6.79569	6.70043	6.78986	6.71295	6.64613	6.79747	6.77664	6.80189	6.62529
ILMN_1653766	7.01743	7.09467	7.18215	7.17642	6.99048	7.02807	6.98337	7.01218	7.07099	7.15232	6.52122	6.68394	6.59901	6.54841	6.80189	6.60896	6.5655	6.60759	6.51981	6.56809	6.54744	6.64495
ILMN_1653768	7.18691	7.04731	7.11222	7.08192	7.1042	7.08253	7.08068	7.1382	7.04526	6.99878	6.67595	6.70078	6.71406	6.63129	6.73555	6.76533	6.8164	6.67799	6.74905	6.68044	6.75806	6.71641
ILMN_1653771	7.04582	7.13293	7.04304	7.04793	7.05493	7.1804	7.05986	7.03675	7.04526	7.08192	6.75295	6.87859	6.81589	6.63469	6.73555	6.71086	6.72375	6.69328	6.63876	6.59047	6.72631	6.62356
ILMN_1653783	7.08068	7.14313	7.08192	7.18215	7.07099	7.10291	7.18215	7.05986	7.07099	7.11291	6.8949	6.69564	6.8408	6.77895	6.82203	6.8726	6.73966	6.9	6.91348	6.82029	6.67877	7.12318
ILMN_1653786	7.09753	7.13293	7.09154	7.07224	7.12074	7.19888	7.12163	7.1382	7.07988	7.11291	6.68664	6.89597	6.77778	6.76053	6.8117	6.76415	6.668	6.76298	6.71793	6.74063	6.76105	6.71154
ILMN_1653787	7.15292	7.12436	7.23522	7.15431	7.16965	7.22762	7.20347	7.20005	7.07099	7.14066	6.67853	6.68059	6.73032	6.84243	6.62497	6.76925	6.71672	6.78555	6.67741	6.71606	6.66719	6.66719
ILMN_1653788	7.12163	7.11444	7.01218	7.13476	7.03737	7.01894	6.99577	7.04731	7.14512	7.15232	6.73836	6.63337	6.86759	6.87874	6.82705	6.75752	6.64923	6.70942	6.89875	6.82143	6.75367	6.93482
ILMN_1653793	8.29679	7.95856	8.22877	7.97741	7.81863	7.63216	7.99113	7.72582	7.9277	7.37027	7.67465	7.81916	7.70229	8.08066	8.35427	7.89253	7.99701	7.92141	7.76502	8.13187	7.73062	7.75638
ILMN_1653794	9.96436	9.73912	10.1378	10.0243	9.92544	10.0151	10.3325	9.83414	9.00169	10.0878	8.58008	7.47934	7.9763	8.53462	8.6114	7.93442	8.12656	8.34416	8.48559	8.94318	8.2407	8.44906
ILMN_1653797	9.84037	10.2036	9.68797	9.91189	9.44184	8.92927	9.93788	9.07939	10.0125	9.60767	8.72784	8.53518	8.76218	8.40816	8.92786	8.80752	8.63177	8.64651	9.11988	8.97962	9.12954	9.01494
ILMN_1653799	6.98085	7.05656	7.13008	7.13476	7.1446	7.08253	7.15232	7.16257	7.08956	7.06122	6.79329	6.73371	6.65672	6.68012	6.74647	6.71793	6.68341	6.79995	6.77178	6.70478	6.78841	6.79404
ILMN_1653801	7.09753	7.0762	7.07224	7.19579	7.08876	7.09276	7.07018	7.07099	7.12163	7.16257	6.77082	6.80655	6.91455	6.8674	6.68071	6.63689	6.83564	6.76171	6.81731	6.72353	6.89405	6.75238
ILMN_1653807	7.18215	7.0762	6.99048	7.08956	7.04582	7.11222	6.99577	7.07099	7.04526	7.02964	6.6679	6.68394	6.62647	6.66477	6.74776	6.76669	6.75624	6.8332	6.74528	6.79631	6.67877	6.63399
ILMN_1653814	7.1382	7.04731	7.05129	7.15431	7.07099	7.07347	7.11291	7.22877	7.07988	7.10291	6.79569	6.7651	6.67731	6.77188	6.77915	6.7416	6.7416	6.73651	6.77778	6.73814	6.77642	6.73521
ILMN_1653821	7.17383	7.0762	7.13008	7.26229	7.03737	7.18952	7.14254	7.1289	7.00726	7.17141	6.59674	6.61775	6.7165	6.57108	6.68226	6.76533	6.72045	6.72715	6.72616	6.70586	6.62999	6.70365
ILMN_1653822	7.1042	7.18835	7.09154	7.26229	7.23982	7.06474	7.22527	7.2135	7.04526	7.16257	6.66303	6.82051	6.82632	6.71641	6.67947	6.76009	6.80446	6.7399	6.7388	6.81375	6.7416	6.76797
ILMN_1653824	7.1446	7.0857	7.13008	7.11291	7.08068	7.1446	7.08068	7.08192	7.11366	7.19299	6.89325	6.83844	6.80014	6.67094	6.85879	6.95975	6.62708	6.84866	6.82548	6.73346	6.79588	6.70211
ILMN_1653826	7.18215	7.1042	7.15746	7.07224	7.22706	7.24685	7.16257	7.1289	7.02617	7.19299	6.96279	6.85144	6.84496	6.9293	7.02436	6.75752	6.82875	6.79747	6.7324	7.03121	6.76837	6.85364
ILMN_1653828	9.84261	10.2853	9.95906	10.1796	10.2	10.4095	10.3289	10.1263	10.1304	10.1088	9.56621	10.0486	10.1044	9.48497	10.0001	9.68611	9.92515	9.86353	9.85225	9.55487	9.64569	9.92856
ILMN_1653829	7.09031	7.05656	7.07224	7.05656	7.1446	7.10291	7.13061	7.1289	7.07988	7.14066	6.69518	6.80975	6.82416	6.86886	6.75658	6.66778	6.75516	6.79121	6.79986	6.74063	6.72343	6.7868
ILMN_1653833	7.19385	7.17898	7.13008	7.15431	7.18215	7.1289	7.23522	7.15174	7.1975	7.2135	6.84184	6.74605	6.59433	6.6129	6.73123	6.72485	6.60509	6.80224	6.80901	6.79101	6.61775	6.74776
ILMN_1653834	6.99878	7.06611	7.03236	7.09529	7.00822	7.1289	7.05986	7.00141	7.04526	7.08192	6.53651	6.52832	6.57108	6.61431	6.69014	6.61051	6.58938	6.58404	6.57439	6.46885	6.71254	6.74605
ILMN_1653836	7.03737	7.0762	7.10231	7.06474	7.08876	7.1289	7.12163	7.09337	7.08956	7.12163	6.90737	6.72147	6.70345	6.78806	6.8526	6.85125	6.7416	6.78555	6.83597	6.74548	6.78841	6.9175
ILMN_1653846	7.1446	7.13293	7.09154	7.18215	7.09529	7.13759	7.18215	7.02528	7.1975	7.23584	6.83341	6.66926	6.74647	6.61016	6.74905	6.7493	6.78032	6.7399	6.71519	6.7429	6.79881	6.74419
ILMN_1653856	8.49708	8.53696	8.24242	8.21797	8.0072	7.45703	7.88503	7.30054	8.22009	7.55869	7.81117	7.74884	7.92627	7.89881	7.26684	7.48672	7.74835	7.43055	7.45432	7.56925	7.10699	7.28451
ILMN_1653861	7.30676	7.16125	7.41037	7.25082	7.37614	7.34555	7.36704	7.48541	7.30823	7.2983	7.17277	7.24787	7.04837	7.15437	7.24698	7.14395	7.23506	7.54755	7.09665	7.14443	7.37322	7.45002
ILMN_1653864	7.07224	7.11444	7.07224	7.1289	7.11291	7.13759	7.07018	7.07099	7.11366	7.2135	6.7553	6.64981	6.66594	6.71044	6.63876	6.71925	6.68787	6.74151	6.70211	6.63119	6.71075	6.9566
ILMN_1653865	7.12163	7.14313	7.09154	7.15098	7.11291	7.0109	7.17273	7.07099	7.16965	7.17141	6.67947	6.66099	6.61775	6.68372	6.82203	6.69024	6.70821	6.6049	6.67072	6.70842	6.67595	6.85661
ILMN_1653867	7.03737	7.05656	7.04304	7.08956	7.1289	7.21794	7.00642	7.05986	7.12163	7.03871	6.80758	6.52641	6.66819	6.66594	6.63453	6.697	6.57749	6.68394	6.65799	6.7122	6.59628	6.69564
ILMN_1653871	7.57112	7.6495	8.22413	7.79213	7.79176	7.82163	8.01889	8.3999	8.26003	8.14068	7.93096	8.96741	8.23068	7.71602	9.78056	7.69809	8.21586	8.51099	8.8494	8.83979	8.83922	9.02049
ILMN_1653876	7.1042	7.14313	7.21794	7.26563	7.20528	7.1446	7.29776	7.15174	7.19024	7.2042	6.77315	6.8418	6.8584	6.72243	6.88	6.80407	6.99006	6.86777	6.89971	6.77895	7.021	7.1099
ILMN_1653878	7.11366	7.1042	7.10231	7.01434	7.03737	7.03737	7.11291	7.00141	7.07099	6.98847	6.74419	6.58452	6.71295	6.63376	6.72485	6.75059	6.84612	6.89875	6.82793	6.65534	6.64025	6.70832
ILMN_1653879	7.07224	7.0762	7.09154	7.16257	7.08876	7.07347	7.09031	7.15174	7.07988	7.10291	6.67853	6.81147	6.65028	6.69261	6.59575	6.62507	6.67832	6.65672	6.66662	6.74647	6.61276	6.6889
ILMN_1653896	7.27602	7.39893	7.35235	7.26903	7.393	7.37027	7.47899	7.18634	7.29221	7.17141	7.04495	6.82051	7.14047	7.0169	6.80655	6.92309	7.16688	6.82089	6.98735	6.98302	6.99026	7.18709
ILMN_1653904	7.20005	7.15232	7.22762	7.20684	7.15344	7.17141	7.19299	7.1042	7.08956	7.13061	6.79444	6.80502	6.67989	6.89662	6.76542	6.67762	6.67062	6.81712	6.70842	6.74063	6.94294	6.87823
ILMN_1653910	7.07224	7.12436	7.10231	7.1042	7.05493	7.09276	7.03737	7.1289	7.19024	7.12163	6.73123	6.70566	6.79329	6.82762	6.8526	6.72485	6.78483	6.7844	6.77675	6.7071	6.82622	6.65672
ILMN_1653927	6.95031	7.14313	7.10231	7.02373	6.99048	7.11222	7.10231	7.02528	7.09674	7.06122	6.66303	6.55268	6.64413	6.60764	6.67697	6.61916	6.53679	6.64753	6.78986	6.63376	6.64356	6.59872
ILMN_1653934	7.02736	7.06611	7.07224	7.03095	7.12074	7.08253	7.10231	7.02528	7.03531	7.05001	6.76435	6.61276	6.48978	6.50494	6.71489	6.71519	6.51074	6.57095	6.52285	6.56955	6.73096	6.61051
ILMN_1653940	7.21794	7.06611	7.13989	7.16965	7.08876	7.01894	7.09031	7.34183	7.09674	7.09154	6.93904	6.94765	6.75224	6.82305	6.79246	6.69564	6.65418	6.75669	6.77778	6.72846	6.77178	6.76925
ILMN_1653945	7.12163	7.0857	7.12074	7.16257	7.09529	7.13759	7.05986	7.15174	7.06122	7.03871	6.72212	6.76669	6.74419	6.80975	6.76542	6.72212	6.72375	6.63538	6.60692	6.72353	6.69014	6.69742
ILMN_1653956	7.11366	7.0168	7.17383	7.17642	7.17642	7.09276	7.14254	7.40157	7.11366	7.10291	6.60176	6.78806	6.69385	6.75712	6.80923	6.81967	6.70821	6.68044	6.65672	6.69024	6.62356	6.72762
ILMN_1653965	7.08068	7.05656	7.12074	7.1289	7.08068	7.15344	7.19299	7.01218	7.07988	7.14066	6.66063	6.80655	6.86505	6.68124	6.73002	6.8246	6.87162	6.79121	6.7165	6.72222	6.75669	6.61752
ILMN_1653980	7.09753	7.13293	7.13989	7.17642	7.19138	7.16257	7.14254	7.03675	7.1975	7.09154	6.84852	6.90402	6.80531	6.79005	6.71873	6.77188	6.75034	6.72978	6.77675	6.69945	6.89405	6.77213
ILMN_1653991	7.02736	7.04731	7.05129	7.02373	7.1042	7.1289	7.15232	7.09337	7.06122	7.05001	6.6129	6.6094	6.54036	6.61431	6.64217	6.57614	6.67062	6.68044	6.56118	6.58029	6.6269	6.73371
ILMN_1653995	7.07224	7.0762	7.06249	7.13476	7.1382	7.18952	7.15232	7.16257	7.07099	7.06122	6.68316	6.78483	6.64413	6.60285	6.70821	6.7587	6.69158	6.68044	6.72212	6.73346	6.8116	6.74919
ILMN_1654001	7.26357	7.21986	7.33868	7.32015	7.20528	7.15344	7.16257	7.04731	7.24039	7.09154	6.62627	6.70852	6.75702	6.76665	6.71352	6.65936	6.70454	6.66522	6.72762	6.68166	6.74627	6.72762
ILMN_1654010	7.8183	7.69031	7.74163	7.68217	7.62644	7.40368	7.67297	7.83763	7.7098	7.2983	7.41538	7.38155	7.57721	7.50059	7.31439	7.79169	7.46355	7.33485	7.50268	7.61975	7.48692	7.37224
ILMN_1654013	7.1446	7.13293	7.05129	7.13476	7.1382	7.09276	7.26855	7.18634	7.16184	7.18215	6.72892	6.66926	6.79227	6.78128	6.60132	6.5923	6.67595	6.64613	6.77915	6.87574	6.68848	6.94043
ILMN_1654016	12.0115	12.2439	11.9965	11.9996	12.2667	11.9996	12.1868	11.6818	12.1298	11.8717	12.4457	12.3038	12.3379	12.4371	12.5033	12.6002	12.3661	12.2882	12.4371	12.3899	12.3713	12.6907
ILMN_1654031	7.05493	7.11444	7.02231	7.06474	7.1042	7.09276	7.09031	7.05986	7.1042	7.11291	6.68316	6.76009	6.71904	6.74031	6.71489	6.70821	6.867	6.801	6.84612	6.8567	6.84773	6.66915
ILMN_1654032	7.53755	7.393	7.28583	7.4395	7.45273	7.66301	7.4264	7.63507	7.34555	7.42033	7.54506	7.70141	7.60577	7.40568	7.67519	7.24317	7.44624	7.54285	7.50469	7.4752	7.26684	7.32221
ILMN_1654043	7.02736	7.0857	7.15746	7.08192	7.08876	7.05656	7.08068	7.05986	7.07988	7.02964	6.78806	6.71661	6.58139	6.82977	6.73555	6.74548	6.61051	6.74151	6.58427	6.70586	6.65723	6.63598
ILMN_1654049	7.05493	7.1042	7.15746	7.16257	7.19888	7.07347	7.15232	7.1042	7.18215	7.13061	6.82225	6.62143	6.6973	6.67757	6.71991	6.68361	6.80935	6.7938	6.79747	6.71086	6.84621	6.64679
ILMN_1654056	7.08068	7.16965	7.07224	7.03095	7.11291	7.01894	7.01743	7.01218	7.07988	7.05001	6.59818	6.7071	6.63888	6.72485	6.87846	6.70942	6.65672	6.60609	6.58815	6.72222	6.78052	6.65824
ILMN_1654060	7.73459	8.63513	8.15226	8.07677	8.40557	8.95151	8.4619	8.83621	8.32153	8.66493	8.74543	8.14967	8.90147	8.79453	8.81316	8.37451	8.26243	8.36609	8.67667	8.67123	7.99947	9.89365
ILMN_1654063	7.22364	7.17898	7.16498	7.2135	7.2193	7.11955	7.2135	7.36061	7.17642	7.27394	6.80758	6.63506	6.75563	6.75402	6.76797	6.7493	6.87282	6.65809	6.80655	6.85004	6.60142	6.80559
ILMN_1654064	7.09753	7.05656	7.08192	7.04793	7.07099	7.16257	7.09031	6.98847	7.08956	7.07224	6.77769	6.70376	6.63259	6.59468	6.67072	6.73741	6.68071	6.68529	6.73123	6.70478	6.78052	6.6889
ILMN_1654065	7.11366	7.16125	7.08192	7.33868	7.44598	7.64995	7.18215	7.20005	7.11366	7.25947	6.69751	6.71054	6.79881	6.77895	7.60632	7.32699	7.05454	7.20856	6.90297	7.23569	6.96797	6.95979
ILMN_1654068	7.23522	7.22762	7.26903	7.29776	7.27701	7.4257	7.37666	7.26357	7.22364	7.27394	7.22783	7.00404	7.29087	7.09465	7.12862	7.49085	7.19799	7.334	7.25934	7.21926	7.15272	7.37408
ILMN_1654072	6.99878	7.05656	7.03236	7.15431	7.1042	7.04793	7.05986	7.08192	7.01607	7.07224	6.65418	6.7385	6.72111	6.52861	6.67312	6.62507	6.86896	6.7324	6.7324	6.82601	6.73696	6.75059
ILMN_1654073	7.15292	7.15232	7.09154	7.1042	7.1446	7.02807	7.17273	7.08192	7.07099	7.06122	6.83475	6.78483	6.85968	6.65809	6.70566	6.6889	6.668	6.84492	6.6679	6.74647	6.69923	6.639
ILMN_1654074	7.20528	7.06611	7.15746	7.12074	7.18215	7.17141	7.16257	7.09337	7.19024	7.15232	6.86821	6.94528	7.0081	6.84243	6.78966	6.81128	7.05039	7.08474	7.06474	6.76828	6.83221	6.85941
ILMN_1654099	7.33616	7.41889	7.42723	7.34183	7.63704	7.55176	7.50507	7.40157	7.54585	7.5493	7.12099	7.04272	7.1261	7.06224	7.18387	7.34055	7.10451	7.26098	7.15383	7.02491	7.17674	7.21686
ILMN_1654108	7.06249	7.05656	7.03236	7.01434	7.00077	7.11222	7.10231	7.08192	7.06122	7.02964	6.6424	6.80313	6.75224	6.70019	6.70942	6.73861	6.72485	6.67924	6.6818	6.77895	6.66375	6.70832
ILMN_1654109	7.08068	7.04731	7.30054	7.09529	7.08068	7.07347	7.16257	7.15174	7.02617	7.14066	6.84501	6.79404	6.65926	6.80428	6.74776	6.70566	6.83667	6.71559	6.78032	6.84893	6.69618	6.6856
ILMN_1654112	7.25796	7.24097	7.13008	7.20684	7.22706	7.35358	7.34697	7.03675	7.25796	7.11291	6.79444	7.04272	7.22853	6.97522	7.0659	7.17898	7.07491	6.97754	7.02978	6.95458	7.098	6.7738
ILMN_1654118	8.90296	9.11926	8.91579	8.91727	8.82259	9.49262	8.65076	9.28306	8.65455	9.30055	8.97443	8.51112	8.72422	8.87176	9.07957	9.37941	8.21935	8.96358	8.86252	8.88724	8.7989	9.47202
ILMN_1654129	7.06249	7.11444	7.14838	7.12074	7.05493	7.00197	7.09031	7.1382	7.13872	7.06122	6.78275	6.67251	6.76435	6.66719	6.77675	6.76669	6.69529	6.69576	6.74388	6.69024	6.71075	6.7868
ILMN_1654137	7.11366	7.22762	7.17383	7.20171	7.17642	7.04793	7.19299	7.1042	7.15344	7.11291	6.78168	6.69564	6.71528	6.70509	6.7883	6.73204	6.73479	6.71065	6.67481	6.82143	6.68206	6.86376
ILMN_1654141	7.13008	7.2135	7.23522	7.24039	7.19888	7.38597	7.22527	7.15174	7.2294	7.24861	6.8116	6.63506	6.82416	6.82875	6.93473	6.88	6.8117	6.93894	6.85054	6.9764	6.79588	7.08944
ILMN_1654151	11.665	11.4359	11.7332	11.3616	11.6711	11.4106	11.6392	11.5313	11.4936	11.6891	11.8397	11.3434	11.5175	11.5663	11.3543	11.7928	11.6105	11.9059	11.6417	11.6298	11.6259	11.5862
ILMN_1654153	7.03737	7.13293	7.07224	7.11291	7.1289	7.15344	7.11291	7.08192	7.09674	7.2042	6.74528	6.63656	6.66819	6.67246	6.6979	6.83301	6.68206	6.64902	6.66089	6.67627	6.70931	6.73226
ILMN_1654165	7.06249	7.06611	7.03236	7.09529	7.16965	7.01894	7.09031	7.1289	7.06122	7.14066	6.78389	6.73555	6.6722	6.76171	6.86139	6.90402	6.79404	6.84109	6.72892	6.68166	6.6979	6.79111
ILMN_1654170	7.17383	7.0857	7.12074	7.07224	7.12074	7.06474	7.09031	7.1289	7.02617	7.07224	6.64356	6.64981	6.63772	6.70376	6.76298	6.65385	6.72293	6.63405	6.67595	6.69271	6.75669	6.66915
ILMN_1654171	7.01743	7.12436	7.05129	7.07224	7.1446	7.05656	7.08068	7.08192	7.03531	7.02964	6.62859	6.80313	6.63516	6.69751	6.63281	6.69158	6.69271	6.78032	6.71519	6.67251	6.611	6.70689
ILMN_1654185	7.16819	7.15232	7.12074	7.17642	7.1289	7.15344	7.12163	7.09337	7.12163	7.14066	6.65034	6.77129	6.74528	6.75712	6.7429	6.78579	6.77558	6.83857	6.78756	6.64774	6.7416	6.60285
ILMN_1654187	7.1382	7.23522	7.13989	7.19579	7.11291	7.11222	7.19299	7.05986	7.11366	7.16257	6.68765	6.74605	6.82733	6.71991	6.9066	6.84301	6.79871	6.7868	6.76669	6.75414	6.80879	6.7196
ILMN_1654195	7.07224	7.0857	7.13008	7.06474	7.00077	7.03737	7.02736	7.03675	7.09674	7.07224	6.71508	6.6642	6.59167	6.58283	6.57749	6.66636	6.67198	6.68937	6.70577	6.62849	6.7416	6.67731
ILMN_1654200	7.08068	7.12436	7.07224	7.19579	7.19888	7.19888	7.15232	7.16257	7.19024	7.2042	6.73836	6.8418	6.70577	6.76426	6.74537	6.697	6.88808	7.08365	6.78264	6.80625	6.84071	6.82592
ILMN_1654204	7.11366	7.06611	7.11222	7.08956	7.09529	7.09276	7.04793	7.1042	7.1042	7.02964	6.59144	6.75414	6.71173	6.71882	6.7324	6.71376	6.64519	6.61158	6.63129	6.62438	6.76105	6.63738
ILMN_1654210	7.67338	8.04265	7.9361	7.92223	8.02843	7.68287	8.09828	7.8014	8.24198	7.93628	7.64423	8.39942	8.72083	7.69715	7.16264	7.76751	8.7039	8.05651	8.37612	7.94346	9.04918	7.58146
ILMN_1654212	7.18691	7.0857	7.13008	7.25082	7.30054	7.35358	7.2135	7.36061	7.14512	7.12163	6.73706	6.98268	6.96095	6.87232	6.83597	7.01951	6.85987	6.93321	6.92461	7.01528	7.02588	6.85502
ILMN_1654217	7.18215	7.0762	7.06249	7.24039	7.19888	7.09276	7.16257	7.08192	7.13008	7.01894	6.77432	6.74776	6.68372	6.78128	6.56156	6.52861	6.67291	6.76669	6.68316	6.89643	6.57481	6.67731
ILMN_1654226	7.21211	7.12436	7.14838	7.12074	7.00822	7.06474	7.11291	7.1042	7.08956	7.13061	6.66303	6.7776	6.90076	6.80428	6.59866	6.77895	6.81977	6.7553	6.8418	6.73226	6.70232	6.76925
ILMN_1654228	7.02736	7.0762	7.15746	7.05656	7.05493	7.11955	7.11291	7.20005	7.1975	7.18215	6.81384	6.70078	6.75224	6.70642	6.80086	6.78032	6.70821	6.97296	6.7071	6.73696	6.5907	6.79539
ILMN_1654240	7.04582	7.12436	7.02231	7.04793	7.06249	7.05656	7.05986	7.08192	7.16965	7.13061	6.6889	6.63139	6.73521	6.63876	6.77558	6.6722	6.71538	6.61611	6.66385	6.70586	6.80313	6.69231
ILMN_1654246	7.17383	7.263	7.15746	7.23584	7.23472	7.45703	7.18215	7.17383	7.14512	7.24861	6.93007	6.81589	6.9393	7.00933	7.15535	6.98927	6.7619	6.72978	6.84963	6.95088	6.83756	6.9636
ILMN_1654249	7.09753	7.15232	7.16498	7.14254	7.16125	7.13759	7.14254	7.1289	7.12163	7.17141	6.78168	6.80655	6.74647	6.874	6.97199	6.90402	6.87595	6.95827	6.801	6.82491	6.73096	6.70365
ILMN_1654250	7.15292	7.12436	7.14838	7.20684	7.25082	7.17141	7.10231	7.15174	7.19024	7.11291	6.82947	6.77895	6.75224	6.91282	6.66936	6.73491	6.91473	6.86108	6.78389	6.7071	6.88673	6.9566
ILMN_1654261	7.11366	7.0268	7.13008	7.16257	7.08876	7.1446	7.10231	7.11444	7.06122	7.19299	6.85255	6.79569	6.68879	6.7416	6.82579	6.80975	6.64519	6.67051	6.78609	6.79871	6.77315	6.64495
ILMN_1654262	8.37486	8.95151	9.24208	9.32212	8.91479	7.72967	8.87534	8.24035	8.79273	7.75293	8.12724	8.69079	8.76	8.44028	7.57505	8.06762	8.31036	8.07317	8.11685	8.96059	8.25164	7.99765
ILMN_1654268	9.66745	8.91673	9.01556	9.30117	9.16876	8.11845	8.95027	8.48249	8.88193	8.30742	9.92238	9.13198	8.84762	10.1973	9.08445	7.95287	8.63826	9.08415	8.71668	9.02961	8.68005	9.6088
ILMN_1654279	7.07224	7.12436	7.2116	7.04793	7.08068	7.06474	7.17273	7.03675	7.15344	7.08192	6.74528	6.81589	6.73901	6.68519	6.8156	6.8288	6.72892	6.7376	6.66089	6.79871	6.75669	6.78128
ILMN_1654287	7.41931	7.56548	7.46331	7.47899	7.53642	7.18952	7.4114	7.16257	7.49821	7.17141	7.0549	7.08936	7.38485	7.20992	6.92509	6.95827	7.22831	7.00608	7.16474	7.20661	6.77441	7.05841
ILMN_1654288	7.08068	7.11444	7.13008	7.05656	7.1042	7.08253	7.02736	7.2135	7.11366	7.08192	6.52122	6.6889	6.58938	6.62989	6.58139	6.67924	6.79082	6.68044	6.64892	6.61667	6.69271	6.59662
ILMN_1654289	8.27342	8.20498	8.32032	8.17529	8.29296	9.06404	8.32311	8.89602	8.31325	8.59562	8.19834	8.48029	8.32006	8.02189	9.15298	9.13976	8.56741	8.89741	8.74032	8.61984	8.94907	9.19081
ILMN_1654313	7.18215	7.0268	7.12074	7.15098	7.2193	7.13759	7.13061	7.07099	7.07988	7.23584	6.64455	6.91282	6.84496	6.82305	6.71741	6.78158	6.8438	6.82592	6.72045	6.76828	6.81589	6.78986
ILMN_1654317	7.18215	7.16125	7.12074	7.1289	7.1042	7.1804	7.12163	7.1382	7.09674	7.2135	6.7196	6.79121	6.70222	6.66477	6.64113	6.70942	6.65672	6.6512	6.75414	6.77895	6.74905	6.8127
ILMN_1654318	7.16073	7.32015	7.30823	7.24685	7.38668	7.78482	7.28789	7.24582	7.50155	7.65915	7.07796	7.03858	7.13733	7.52882	7.07009	7.51097	7.2726	6.90229	7.22356	7.37797	6.9387	7.02759
ILMN_1654319	7.08068	7.0268	7.05129	7.04793	7.09529	7.43463	7.02736	7.30054	7.17642	7.22527	6.73966	6.90021	6.77895	6.72762	6.94639	7.42443	6.76905	6.97296	6.92167	6.95529	7.32884	6.87823
ILMN_1654320	7.81328	7.71356	7.75326	7.65734	7.74746	8.14885	8.09314	7.93367	7.81888	7.99828	6.9889	6.89597	7.01481	6.99458	7.02577	6.88	7.03117	6.90566	7.06812	6.99937	7.24658	6.8487
ILMN_1654322	8.41556	8.07115	8.24986	8.05793	7.97333	7.93716	8.38221	8.40675	8.02211	7.89226	8.20165	8.69349	8.33095	8.30561	8.6155	8.79947	8.28006	7.97273	8.84873	8.49385	8.58682	8.11685
ILMN_1654323	7.18215	7.14313	7.13008	7.08192	7.1289	7.15344	7.30823	7.09337	7.16184	7.13061	6.99695	6.91098	6.92642	6.94635	6.92509	6.86553	6.93587	6.75414	6.77675	6.92879	6.99887	6.82885
ILMN_1654324	7.08068	7.0857	7.13008	7.16257	7.12074	7.06474	7.12163	7.04731	7.1042	7.06122	6.50247	6.51087	6.68879	6.58538	6.62119	6.66488	6.58938	6.62517	6.64563	6.67909	6.65534	6.70965
ILMN_1654331	7.13008	7.04731	7.13989	7.1289	7.16965	7.06474	7.2135	7.08192	7.18215	7.2983	6.70019	6.89023	6.80304	6.69158	6.74647	6.83988	6.77558	6.78996	6.64305	6.71741	6.82622	6.79694
ILMN_1654336	7.02736	7.1042	7.14838	7.038	7.06249	7.1446	7.19299	7.32264	7.11366	7.009	6.88132	6.66248	6.82539	6.68372	6.75034	6.7429	6.77021	6.7399	6.68024	6.69677	6.66543	6.68735
ILMN_1654340	7.06249	7.09467	7.06249	7.09529	7.12074	7.23667	7.16257	7.1289	7.15344	7.22527	6.63259	6.69241	6.72702	6.61688	6.70043	6.71254	6.55251	6.66636	6.54697	6.61016	6.64701	6.75059
ILMN_1654346	7.05493	7.15232	7.07224	7.07224	7.16125	7.07347	7.14254	7.04731	7.07099	7.09154	6.67947	6.68735	6.84496	6.75176	6.76797	6.77895	6.69886	6.72092	6.7887	6.8127	6.70089	6.74776
ILMN_1654354	7.09753	7.1042	7.10231	7.1042	7.00822	7.04793	7.17273	7.09337	7.09674	7.06122	6.76094	6.73555	6.6973	6.69518	6.703	6.75347	6.66926	6.84866	6.60089	6.75286	6.77178	6.7399
ILMN_1654357	7.56676	7.80063	7.78661	7.76614	7.54619	7.63216	7.89934	8.07581	7.87623	7.80865	7.57522	7.82741	7.57505	7.73592	8.47708	8.53037	7.67247	8.24525	8.37522	7.97789	8.00494	8.39245
ILMN_1654365	7.02736	7.0762	7.06249	7.1289	7.08876	7.04793	7.09031	7.09337	7.09674	7.06122	6.62757	6.79569	6.61158	6.70131	6.71873	6.65672	6.7512	6.68529	6.79601	6.76468	6.65039	6.86079
ILMN_1654369	7.1446	7.21986	7.16498	7.11291	7.09529	7.27801	7.15232	7.11444	7.15344	7.13061	6.67947	6.7429	6.66819	6.66216	6.9448	6.66341	6.7586	6.73371	6.65142	6.72965	6.77441	6.67731
ILMN_1654370	7.77916	7.79538	7.73714	7.64296	7.71656	7.48731	7.68932	7.59555	7.69273	7.7106	7.51332	7.13595	7.29359	7.58489	7.36485	7.09065	7.45002	7.24694	7.5374	7.71751	7.32573	7.48204
ILMN_1654378	7.02736	7.16125	7.11222	7.038	7.1042	7.04793	7.00642	7.1382	7.1042	7.07224	6.78275	6.80655	6.78861	6.76171	6.72616	6.67924	6.79631	6.85968	6.75925	6.93321	6.84621	6.86954
ILMN_1654385	7.96439	8.18979	8.20223	8.01168	7.91631	7.8542	8.05793	8.04894	7.93685	7.87218	7.92619	7.80871	7.97747	7.86794	7.5916	7.70138	8.10202	8.02349	8.23759	7.72467	7.7755	8.28817
ILMN_1654386	7.07224	7.06611	7.00141	7.11291	7.1042	7.05656	7.11291	7.04731	7.02617	7.09154	6.77315	6.68394	6.71406	6.72134	6.70942	6.8554	6.67198	6.69923	6.73371	6.81375	6.83221	6.68389
ILMN_1654389	7.35009	7.11444	7.30054	7.26229	7.2193	7.0109	7.03737	7.24582	7.26406	7.15232	7.00863	6.73706	6.80159	6.7583	6.7616	6.94304	6.94601	6.7311	6.65799	7.00829	6.7913	6.87377
ILMN_1654392	7.93127	8.25454	8.1385	7.88009	8.05793	8.64233	8.09828	8.6136	7.95783	8.25073	8.61669	8.66903	8.94527	8.44873	9.81058	8.91663	8.5741	8.57154	8.83793	8.2848	8.66728	9.52329
ILMN_1654394	7.06249	7.14313	7.08192	7.22527	7.01894	7.0109	7.13061	7.03675	7.01607	6.99878	6.68071	6.59325	6.66705	6.73576	6.76426	6.70243	6.801	6.60308	6.71519	6.77895	6.78052	6.6856
ILMN_1654396	13.9891	14.251	14.1864	14.1259	14.2386	14.1731	14.2292	14.1531	13.9891	14.0815	13.8404	13.8193	13.8843	13.9074	13.5245	13.6295	13.8493	13.7872	13.7872	13.6757	13.913	13.6233
ILMN_1654398	7.82738	7.80063	7.48983	7.45378	7.52145	7.74746	7.49771	7.56548	7.67244	7.5053	7.34598	7.04708	7.14773	7.33607	7.45489	7.85672	7.19196	7.5075	7.36134	7.10921	7.31539	7.17442
ILMN_1654402	7.01743	7.0857	7.07224	7.04793	7.16125	7.09276	7.12163	7.04731	7.01607	7.009	6.65936	6.65799	6.59058	6.55516	6.59866	6.61916	6.53794	6.64753	6.52285	6.49877	6.63855	6.69564
ILMN_1654403	7.13008	7.05656	7.13008	7.07224	7.1382	7.10291	7.11291	7.1042	7.04526	7.06122	6.75977	6.65936	6.56832	6.85095	6.65132	6.79424	6.74776	6.81712	6.73501	6.69945	6.70232	6.86661
ILMN_1654408	7.09031	7.00578	7.08192	7.22527	7.02736	7.09276	6.98337	7.15174	7.13008	7.16257	6.80841	6.8318	6.67084	6.81702	6.72762	7.02877	6.91282	6.76936	6.62952	6.76242	6.76415	7.12184
ILMN_1654411	7.05493	7.05656	7.13989	7.04793	7.12074	7.11955	7.03737	6.98847	7.05266	7.05001	6.63376	6.58649	6.76669	6.54273	6.67697	6.67062	6.71065	6.70566	6.7553	6.64902	6.85683	6.76637
ILMN_1654413	7.16073	7.13293	7.06249	7.02373	7.00822	7.07347	7.08068	7.17383	7.11366	7.09154	6.69886	6.74021	6.64144	6.79778	6.67947	6.74419	6.77021	6.68664	6.6722	6.84501	6.70931	6.72092
ILMN_1654414	7.16819	7.14313	7.16498	7.15431	7.1042	7.15344	7.2135	7.1289	7.2042	7.28643	6.82225	6.82569	6.76552	6.66089	6.78566	6.95975	6.98471	7.08293	6.89648	6.9764	6.89701	6.9889
ILMN_1654415	6.96086	7.1042	7.13989	7.11291	7.01894	7.09276	7.13061	7.1382	7.03531	7.03871	6.79569	6.63139	6.62517	6.62356	6.75904	6.66926	6.64923	6.66522	6.71793	6.76828	6.57882	6.7399
ILMN_1654421	7.36582	7.48238	7.35235	7.36061	7.30823	7.36061	7.27902	7.18634	7.27602	7.36005	7.11198	6.78986	6.99504	7.16259	6.87693	6.80975	7.07366	7.16402	7.05728	7.0221	6.86777	7.03845
ILMN_1654422	7.21794	7.19579	7.21794	7.18215	7.22706	7.23667	7.16257	7.15174	7.12163	7.17141	6.93482	6.95511	6.96563	6.874	7.3636	7.02491	6.99544	6.91131	6.85163	6.88916	6.93147	7.03533
ILMN_1654427	7.04582	7.12436	7.04304	6.90356	7.1382	7.1804	7.05986	7.03675	7.07988	7.03871	6.7416	6.81726	6.5867	6.54538	6.72485	6.80407	6.71793	6.89469	6.74528	6.59047	6.75367	6.71641
ILMN_1654429	7.11366	7.11444	7.07224	6.99798	7.1382	7.07347	7.08068	7.11444	7.07099	7.13061	6.69751	6.6094	6.61276	6.70642	6.66303	6.77452	6.80559	6.72857	6.78483	6.64774	6.66375	6.66008
ILMN_1654430	7.06249	7.05656	7.16498	6.99798	7.03737	7.07347	7.11291	7.11444	7.04526	7.09154	6.66572	6.78032	6.73802	6.65809	6.68496	6.78158	6.77675	6.77432	6.6722	6.73966	6.80313	6.61573
ILMN_1654436	7.20528	7.18835	7.17383	7.04793	7.11291	7.10291	7.13061	7.17383	7.11366	7.16257	6.66683	6.81283	6.79558	6.68519	6.79588	6.76797	6.7311	6.7376	6.78986	6.77664	6.71075	6.73371
ILMN_1654441	8.7381	8.82077	8.59358	9.16223	9.22032	8.8943	8.89046	8.93089	9.07148	9.02366	8.65128	8.1769	8.21728	8.93155	8.65476	8.08994	8.39395	8.7604	8.76104	9.15142	8.53345	9.0972
ILMN_1654445	8.12327	7.70903	8.06118	8.08272	8.20564	8.69037	8.20082	8.57131	7.81457	8.27157	7.80444	7.42028	7.3945	7.64048	7.82617	7.75084	7.28886	7.78738	7.70819	7.8366	7.75593	7.95485
ILMN_1654452	7.01743	6.99577	7.02231	7.1289	7.04582	7.13759	7.00642	7.08192	7.16184	7.09154	6.73123	6.71054	6.58283	6.7859	6.89884	6.68071	6.689	6.73371	6.81731	6.63119	6.85683	6.80437
ILMN_1654457	7.07224	7.05656	7.11222	7.1042	7.03737	7.13759	7.12163	7.22877	7.08956	7.07224	6.97555	6.70222	6.92154	7.01903	6.7405	6.7616	6.80348	6.85353	7.12535	6.99872	6.75958	6.88722
ILMN_1654458	7.05493	7.17898	7.12074	7.09529	7.1042	7.06474	7.12163	7.17383	7.13872	7.09154	6.64807	6.59891	6.65281	6.64252	6.6979	6.67062	6.54348	6.66636	6.75048	6.61667	6.70586	6.69886
ILMN_1654459	7.13008	7.06611	7.13989	7.08192	7.02736	7.20684	7.10231	7.07099	7.08956	7.16257	6.76435	6.75414	6.80304	6.77188	6.66572	6.71641	6.69641	6.78806	6.814	6.65534	6.662	6.6889
ILMN_1654466	7.08068	7.09467	7.11222	7.09529	7.19138	7.06474	7.15232	7.1042	7.09674	7.08192	6.79215	6.72631	6.88019	6.78358	6.73401	6.60285	6.66926	6.76171	6.7388	6.81805	6.83221	6.64827
ILMN_1654468	7.22364	7.1042	7.19138	7.15431	7.25082	7.11955	7.05986	7.16257	7.19024	7.16257	6.84501	6.71661	6.69945	6.86808	6.92374	7.0933	6.76308	6.78294	6.76669	6.8127	6.72191	6.7399
ILMN_1654473	7.1042	7.0857	7.14838	7.13476	7.16965	7.19888	7.09031	7.07099	7.08956	7.08192	6.73123	6.71352	6.73662	6.78128	6.78566	6.72902	6.64817	6.67697	6.79601	6.77778	6.72343	6.67731
ILMN_1654474	7.05493	7.13293	7.13008	7.1042	7.06249	7.17141	7.14254	7.00141	7.18215	7.2135	6.70454	6.74021	6.79444	6.81896	6.7616	6.83453	6.77675	6.69061	6.6234	6.65799	6.61775	6.67062
ILMN_1654479	7.04582	7.0168	7.09154	7.1042	7.04582	7.06474	7.05986	7.09337	7.05266	7.06122	6.81589	6.69564	6.72474	6.69518	6.78966	6.82225	6.75752	6.62664	6.6818	6.63936	6.79588	6.74919
ILMN_1654488	7.33616	7.6021	8.09504	7.97741	7.63704	8.17112	7.89186	8.30994	7.90466	8.30031	7.55899	7.8264	7.90552	7.47371	8.52416	8.57434	7.85176	7.7828	8.07256	7.78505	8.14916	8.56882
ILMN_1654493	7.1446	7.23522	7.22762	7.2135	7.11291	7.1804	7.20347	6.96454	7.08956	7.07224	6.82438	6.93874	6.66946	6.8116	6.7324	6.79121	6.81772	6.80758	6.87419	6.82377	6.78367	6.65166
ILMN_1654496	7.11366	7.14313	7.18215	7.06474	7.1289	7.09276	7.13061	7.1289	7.05266	7.06122	6.71508	6.66926	6.64144	6.79005	6.78294	6.84152	6.69158	6.77675	6.71793	6.74063	6.662	6.72443
ILMN_1654497	7.82206	7.79538	7.77708	7.74278	7.77749	7.57945	7.82738	7.38115	7.862	7.76095	7.08257	7.20725	6.97966	7.3271	6.95309	6.87693	7.1856	6.81138	7.13342	7.25529	7.021	7.18991
ILMN_1654504	7.05493	7.11444	7.13989	7.1289	7.11291	7.11222	7.12163	7.1042	7.12163	7.12163	6.69158	6.61276	6.65028	6.81578	6.73662	6.70243	6.69158	6.74399	6.73501	6.72846	6.72781	6.69394
ILMN_1654516	7.64233	7.58073	7.89093	7.83118	7.55105	8.12658	7.66513	7.93367	7.68101	7.86559	7.60351	7.8828	7.7827	7.43035	7.63073	7.5932	7.49693	7.59017	7.5185	7.78061	7.63845	7.843
ILMN_1654518	9.0898	9.22973	8.46027	8.48035	8.74275	9.41309	9.36741	9.5433	8.87542	8.99694	9.73865	10.9741	10.8812	9.96669	10.0919	9.57994	9.91103	10.5988	9.53633	8.43791	9.80774	9.69823
ILMN_1654522	7.04582	7.03737	7.13008	7.04793	7.02736	7.07347	7.16257	7.00141	7.04526	6.98847	6.64923	6.63656	6.68879	6.61809	6.74776	6.6722	6.72892	6.68787	6.68579	6.64646	6.56072	6.64679
ILMN_1654526	7.00822	7.0268	7.12074	7.1042	7.07099	7.05656	7.05986	7.08192	7.06122	7.13061	6.69751	6.68568	6.69945	6.86808	6.74419	6.66636	6.64283	6.73651	6.68579	6.78705	6.70433	6.71154
ILMN_1654534	7.1042	7.16965	7.13008	7.01434	7.1289	7.17141	7.09031	7.15174	7.05266	7.22527	6.75414	6.87142	6.73901	6.75516	6.77315	6.99125	6.79165	6.66099	6.78483	6.72965	6.76105	6.62886
ILMN_1654540	7.04582	7.14313	7.02231	7.15431	7.09529	7.08253	7.01743	7.20005	7.01607	7.10291	6.71264	6.80313	6.73142	6.82977	6.80086	6.70243	6.67832	6.7844	6.88136	6.71741	6.76253	6.639
ILMN_1654541	7.15292	7.19579	7.2116	7.08192	7.17642	7.33726	7.20347	7.15174	7.08956	7.12163	6.84945	6.73371	6.78756	6.81578	6.76426	6.78851	6.81058	6.89469	6.77305	6.78362	6.73371	6.86954
ILMN_1654542	8.20261	8.28133	8.30872	8.42292	8.39269	8.05957	8.18102	8.27495	8.26003	8.45631	8.30601	8.45318	8.24846	7.83955	8.35707	8.06526	8.34595	8.27063	8.43951	8.05243	8.29486	7.87991
ILMN_1654543	9.5044	9.32319	9.02702	9.08691	9.11436	10.3401	8.85973	10.0913	9.17097	9.85634	8.75548	9.29411	9.09249	9.13446	9.79869	10.2087	9.61247	10.0725	9.929	9.53258	10.0024	9.99206
ILMN_1654545	7.84702	8.06715	7.97989	8.20531	8.48704	8.42819	8.4033	8.27495	8.24198	8.02355	7.84605	9.22877	9.16568	7.66524	7.75539	8.10511	8.91756	7.96717	8.5561	7.85159	8.92333	7.66947
ILMN_1654552	8.71505	8.60926	8.20223	8.79001	8.27095	7.70372	7.92898	7.73777	8.30905	7.87218	8.1307	7.8264	7.83745	8.26851	7.70634	7.15603	7.60445	7.75815	7.31138	7.48816	7.14291	7.69401
ILMN_1654560	9.46293	9.31939	9.56885	9.49199	9.11791	8.46117	9.07227	9.13186	9.34341	8.59562	8.70969	8.99636	8.61262	9.02137	9.929	10.5527	9.5156	9.64328	9.89325	9.42418	10.0014	8.96441
ILMN_1654563	7.24685	7.21986	7.16498	7.27967	7.26903	7.41889	7.17273	7.20005	7.25796	7.2983	7.10139	7.08458	7.16391	7.13718	6.91406	7.01128	7.15905	7.19799	7.01058	6.98735	6.90264	7.26109
ILMN_1654566	8.03847	8.03823	7.84702	7.92223	7.79176	7.23667	7.7363	7.18634	7.69273	7.36005	7.77613	7.57882	7.64818	7.9463	7.0875	7.10166	7.88258	7.01575	7.29304	7.62826	7.48504	7.00106
ILMN_1654570	7.05493	7.18835	7.07224	7.02373	7.2135	7.10291	7.22527	7.2135	7.07988	7.09154	6.87823	6.64634	6.77778	6.7859	6.76542	7.20233	6.85448	6.59639	6.78986	6.77778	6.82194	6.84708
ILMN_1654571	7.82738	7.78661	7.75326	7.79629	7.8457	8.91965	7.52025	8.03042	7.58196	7.99828	7.82325	7.46719	7.73396	8.07621	7.19584	8.98658	7.36134	7.76302	7.35227	7.46105	7.1651	7.86307
ILMN_1654583	8.12327	7.8546	7.99113	7.73314	7.70372	8.60015	7.94604	8.67224	7.89971	8.40587	6.95983	7.03509	7.07909	7.12571	7.45668	7.20725	7.24694	7.29404	7.02491	6.92879	7.11461	7.16614
ILMN_1654586	7.42517	7.53711	7.3806	7.33334	7.34697	7.65672	7.38553	7.63507	7.45315	7.68083	7.59414	7.40948	7.5404	7.54381	7.75884	7.60842	7.49302	7.46394	7.41124	7.35554	7.61146	7.61975
ILMN_1654588	6.97138	7.00578	7.13989	7.038	7.03737	7.06474	7.11291	6.98847	7.15344	7.11291	6.87153	6.68059	6.65028	6.75259	6.69261	6.76298	6.69641	6.74399	6.79246	6.84794	6.831	6.76637
ILMN_1654594	7.12163	7.14313	6.969	7.04793	7.1042	7.13759	7.15232	7.2135	7.07988	7.07224	6.76435	6.78032	6.66705	6.77652	6.70566	6.66488	6.80798	6.70942	6.7376	6.67523	6.61276	6.57147
ILMN_1654598	6.99048	7.06611	7.00141	7.07224	7.2193	7.03737	7.12163	7.18634	7.13872	7.13061	6.66572	6.95708	6.74647	6.78358	6.68226	6.73371	6.7324	6.66099	6.63259	6.79631	6.80758	6.69742
ILMN_1654602	7.04582	7.0857	7.13008	7.16257	7.11291	7.04793	7.02736	7.22877	7.11366	7.09154	6.75647	6.66763	6.73263	6.67491	6.72111	6.7844	6.68568	6.75787	6.77778	6.86986	6.6269	6.55886
ILMN_1654606	7.1446	7.06611	7.10231	7.06474	7.09529	7.11955	7.07018	7.20005	6.95782	7.08192	6.7265	6.64981	6.84496	6.77072	6.79111	6.77895	6.7429	6.7197	6.91555	6.90229	6.75958	6.68735
ILMN_1654609	10.1088	10.0526	10.269	10.2878	10.4372	11.2548	10.3541	11.237	10.1172	11.0428	10.0583	9.51598	9.7125	10.1317	10.8684	9.66661	9.74658	10.4962	10.1493	10.1544	9.8293	10.9783
ILMN_1654612	7.67844	7.6495	7.89971	7.85677	7.93685	7.66301	7.77749	7.48541	7.69273	7.63752	7.79886	7.91115	7.79785	7.99805	7.28886	7.72103	7.97537	7.67994	7.79966	7.86121	7.58191	7.29658
ILMN_1654613	7.1042	7.09467	7.2116	7.2574	7.16965	7.18952	7.11291	7.07099	7.17642	7.12163	6.68529	6.90985	6.93303	6.85592	6.66303	6.90219	6.91158	6.87683	6.83597	6.88741	6.84904	6.9889
ILMN_1654626	7.16073	7.0762	7.13989	7.02373	7.08876	7.02807	7.07018	7.11444	7.08956	7.12163	6.67138	6.63656	6.67084	6.60896	6.87536	6.7208	6.74647	6.65672	6.64434	6.75414	6.64025	6.69231
ILMN_1654629	9.02944	8.99644	8.96984	8.90645	9.23303	9.39118	9.31736	8.8267	9.04379	8.805	9.54817	10.4455	9.90331	9.35197	8.76291	9.52329	10.195	9.71722	9.3239	8.77023	9.64683	8.73531
ILMN_1654630	7.3295	7.49467	7.30054	7.36582	7.41207	7.77268	7.59793	7.34183	7.32482	7.59793	7.22463	7.69425	7.54568	7.19875	7.54196	7.35463	7.35706	7.73218	7.30369	7.04103	7.384	7.3912
ILMN_1654632	7.06249	7.13293	7.23522	7.06474	7.12074	7.19888	7.07018	7.15174	7.16184	7.14066	6.74892	6.6889	6.65153	6.7859	6.72111	6.75463	6.67062	6.78158	6.8268	6.7636	6.81024	6.78545
ILMN_1654634	7.18691	7.05656	7.14838	7.16965	7.19138	7.16257	7.18215	7.16257	7.11366	7.19299	6.65418	6.70566	6.73901	6.76298	6.70566	6.73371	6.75752	6.85481	6.66522	6.69158	6.66375	6.75553
ILMN_1654637	7.1382	7.17898	7.03236	7.12074	7.03737	7.1804	7.14254	7.07099	7.01607	7.19299	6.76212	6.57905	6.62999	6.62107	6.75034	6.73491	6.73716	6.80224	6.70842	6.70842	6.72631	6.70965
ILMN_1654639	8.02369	8.01586	8.17915	8.05793	7.82705	7.93716	7.89186	7.51864	7.862	7.51409	7.62999	7.28462	7.48829	7.55708	7.26573	8.01576	7.28258	6.96506	7.32912	7.46343	7.33215	7.05635
ILMN_1654641	6.99048	7.09467	7.06249	7.04793	7.08876	7.06474	6.94661	7.04731	6.99798	7.06122	6.7688	6.70566	6.76552	6.65039	6.72616	6.69843	6.77796	6.68166	6.81147	6.56955	6.68529	6.63399
ILMN_1654653	7.26357	7.0857	7.09154	7.30123	7.19138	7.23667	7.18215	7.2135	7.17642	7.25947	6.86258	7.05043	6.86633	6.90985	7.00641	6.88145	6.94601	6.88586	6.81511	6.88655	6.93468	6.94639
ILMN_1654663	7.09753	7.04731	7.08192	6.97138	7.1042	7.05656	6.99577	7.2135	7.02617	7.009	6.84733	6.70566	6.80646	6.65458	6.80407	6.79121	6.5639	6.62517	6.56527	6.84794	6.75958	6.64679
ILMN_1654671	7.01743	7.12436	7.09154	7.08192	7.04582	6.99048	6.99577	7.1042	7.04526	7.11291	6.71154	6.71352	6.6862	6.59214	6.63726	6.61916	6.61978	6.71559	6.7416	6.64063	6.63516	6.7399
ILMN_1654672	7.13008	7.05656	7.09154	7.03095	7.16965	7.20684	7.02736	7.03675	7.08956	7.13061	6.67051	6.78032	6.75224	6.74419	6.70043	6.60029	6.65534	6.72605	6.8208	6.7429	6.60742	6.66385
ILMN_1654673	7.28583	7.24861	7.13008	7.038	7.08876	7.1446	7.12163	7.04731	7.06122	7.09154	6.67051	6.74776	6.78756	6.62356	6.75142	6.65799	6.68071	6.628	6.75156	6.61775	6.61276	6.71793
ILMN_1654677	7.06249	7.14313	7.09154	7.18215	7.16125	7.07347	7.17273	7.09337	7.19024	7.03871	6.80841	6.79871	6.74776	6.77315	6.71741	6.66778	6.81283	6.90566	6.80545	6.70965	6.82029	6.83189
ILMN_1654685	7.9074	8.12444	8.0294	7.86521	8.06174	7.33726	7.86071	7.20005	8.05424	7.44053	7.61296	7.77757	7.75896	7.45274	6.96121	7.05585	8.07812	7.04732	7.35671	7.9497	7.6759	6.97239
ILMN_1654689	7.17383	7.15232	7.21794	7.16257	7.09529	7.05656	7.05986	7.01218	7.21211	7.07224	6.9063	6.77129	6.76807	6.85004	6.76298	6.69405	6.90824	6.81355	6.73371	6.70365	6.69463	6.80975
ILMN_1654690	10.2179	10.0786	9.74295	9.64552	9.24208	9.03964	10.0786	9.34341	9.95247	9.28456	9.74193	9.63451	9.56977	9.71944	8.81634	8.34946	9.94664	9.42552	9.45516	9.84367	9.44	8.99999
ILMN_1654691	7.16819	7.263	7.24582	7.18215	7.16965	7.15344	7.16257	7.17383	7.22364	7.14066	6.73023	6.75088	6.64902	6.8127	6.71075	6.75347	6.71925	6.80502	6.7553	6.87574	6.63516	6.7416
ILMN_1654692	7.06249	7.05656	7.08192	7.18952	7.07099	7.06474	7.14254	7.1042	7.09674	7.07224	6.57383	6.70078	6.72343	6.72892	6.76797	6.78986	6.77432	6.74776	6.76669	6.71489	6.66063	6.87105
ILMN_1654696	7.09753	7.0857	7.13989	7.08956	7.19138	7.71719	7.10231	7.1289	6.99798	7.5493	6.64923	6.7071	6.84824	6.74031	8.81203	7.81063	6.89159	7.52494	7.08249	7.19037	7.08692	7.55516
ILMN_1654697	7.17383	7.0857	7.25313	7.11291	7.08876	7.3087	7.2135	7.30054	7.13872	7.05001	6.65799	6.71824	6.88019	6.76426	6.74537	6.68361	6.73371	6.72715	6.78609	6.82377	6.89236	6.77072
ILMN_1654703	7.09753	7.09467	7.06249	7.06474	7.01894	7.03737	7.05986	7.03675	7.12163	7.02964	6.6642	6.63656	6.66493	6.65458	6.9155	6.72616	6.668	6.59639	6.66662	6.61927	6.69271	6.66008
ILMN_1654721	7.07224	7.0762	7.08192	7.15098	7.15344	7.33726	7.14254	7.11444	7.06122	7.10291	6.70832	6.63506	6.77063	6.74548	6.69014	6.77895	6.79995	6.82089	6.71793	6.64902	6.65237	6.52075
ILMN_1654722	7.20528	7.1042	7.13989	7.13476	7.12074	7.17141	7.2135	7.04731	7.05266	7.14066	6.76435	6.74919	6.7165	6.69751	6.7553	6.87105	6.7608	6.77305	6.86038	6.87377	6.66543	6.66915
ILMN_1654726	7.05493	7.06611	7.16498	7.09529	7.1042	7.15344	7.19299	7.05986	7.05266	7.17141	6.58794	6.70078	6.71295	6.70642	6.7416	6.77602	6.79747	6.62366	6.59033	6.69821	6.6269	6.88136
ILMN_1654732	7.07224	7.0268	7.12074	7.18952	7.11291	7.09276	7.02736	7.1382	7.05266	7.18215	6.70704	6.73555	6.65672	6.71044	6.5538	6.76298	6.78955	6.72092	6.70965	6.78841	6.71741	6.62356
ILMN_1654735	8.87173	9.50603	9.34213	9.15171	9.30505	9.59758	9.59738	9.35962	9.47625	9.39875	9.13807	8.90254	9.48578	9.23237	9.54032	9.23839	8.67245	8.72981	9.30721	9.42852	8.9543	9.83637
ILMN_1654737	7.28583	7.14313	7.16498	7.09529	7.09529	7.11222	7.17273	7.09337	7.18215	7.06122	6.72212	6.71508	6.65926	6.92822	6.76669	6.73491	6.75248	6.69809	6.77915	6.91367	6.71882	6.70043
ILMN_1654742	7.12163	7.0268	7.04304	7.06474	7.11291	7.13759	7.04793	7.05986	7.00726	7.14066	6.6642	6.70078	6.79664	6.7583	6.82947	6.5867	6.70942	6.52214	6.64005	6.7071	6.67387	6.58371
ILMN_1654759	7.09031	7.16125	7.07224	7.09529	7.04582	7.09276	7.14254	7.11444	7.12163	7.14066	6.6424	6.61112	6.74776	6.62733	6.63153	6.66778	6.70566	6.62002	6.61112	6.64495	6.82947	6.59266
ILMN_1654766	7.3087	7.16965	7.12074	7.14254	7.15344	7.03737	7.24685	7.2135	6.98011	7.16257	6.70942	6.76669	6.67595	6.65166	6.63453	6.75624	6.70003	6.80224	6.76435	6.83221	6.71741	6.73371
ILMN_1654771	7.09031	7.0168	7.04304	7.04793	6.99048	6.98085	7.09031	7.1042	7.05266	7.05001	6.60417	6.63984	6.59529	6.73371	6.57749	6.64923	6.49761	6.5591	6.80655	6.65534	6.65039	6.58151
ILMN_1654772	7.24685	7.0857	7.10231	7.01434	7.1446	7.04793	7.09031	7.02528	7.14512	7.02964	6.67371	6.72312	6.6603	6.77432	6.81435	6.61775	6.63129	6.48967	6.76053	6.77778	6.79444	6.59468
ILMN_1654773	7.3806	7.37666	7.29482	7.4395	7.3295	7.11222	7.41889	7.08192	7.3981	7.34697	7.0169	7.04872	7.07789	7.03196	6.69394	6.79569	7.02822	6.91131	6.99659	7.12715	7.03134	6.90622
ILMN_1654778	9.27415	8.93319	9.29932	9.39371	9.12113	7.94256	8.91694	9.82217	8.84685	8.2433	10.448	10.4096	10.1113	10.9783	10.7848	10.6284	9.75256	10.0342	10.6668	10.4504	9.16848	11.5244
ILMN_1654779	7.22877	7.16125	7.12074	7.16965	7.18215	7.2983	7.11291	7.22877	7.13872	7.07224	6.76094	6.72474	6.77778	6.83311	6.8156	6.92309	6.8793	6.66763	6.7401	6.87574	6.67387	6.81138
ILMN_1654786	7.02736	6.99577	7.08192	7.09529	7.01894	6.95396	7.13061	7.11444	7.09674	7.06122	6.78986	6.87859	6.74776	6.69024	6.8117	6.66341	6.58938	6.6826	6.60386	6.62968	6.75059	6.65824
ILMN_1654792	7.09031	7.14313	7.16498	7.08956	7.1289	7.08253	7.09031	7.26357	7.08956	7.05001	6.69271	6.82998	6.63645	6.71641	6.83597	6.8487	6.96077	6.97168	6.8021	6.67523	6.70433	6.78545
ILMN_1654812	8.22961	8.26745	8.57095	8.40587	8.31647	7.15344	8.47704	7.95134	8.22789	7.12163	8.06056	8.29837	8.28324	8.17894	8.18671	8.36051	8.03852	7.67616	8.23944	8.12159	8.24961	8.72128
ILMN_1654819	7.32482	7.32015	7.28583	7.393	7.28789	7.16257	7.29776	7.16257	7.30823	7.23584	7.09453	6.88897	6.91455	7.21594	6.85054	7.11161	6.99295	7.10913	7.14875	7.00558	6.82622	6.88568
ILMN_1654823	7.27602	7.26903	7.30054	7.26229	7.31212	7.1289	7.16257	7.2135	7.27602	7.33662	7.06224	6.86966	6.89111	6.94312	6.72616	6.86553	6.97177	6.74905	6.92461	7.04015	6.959	6.77992
ILMN_1654851	7.90496	8.16355	7.97989	7.95109	8.117	8.42819	8.04248	8.12733	7.95416	8.35468	8.2486	8.1982	8.33205	8.40264	7.95205	7.9745	8.10928	7.84981	8.23059	8.33874	8.02359	8.43196
ILMN_1654854	7.12163	7.263	7.15746	7.15098	7.04582	7.19888	7.09031	7.15174	7.12163	7.14066	6.74892	6.64305	6.8418	6.73371	6.88136	6.8683	6.77796	6.65672	6.88136	6.82714	6.68664	6.68735
ILMN_1654855	7.11366	7.12436	7.12074	7.06474	7.06249	7.07347	7.17273	7.09337	7.01607	7.09154	6.7429	6.67893	6.76669	6.67887	6.73401	6.67356	6.7416	6.64753	6.63399	6.74548	6.72781	6.74419
ILMN_1654857	7.09031	7.05656	7.18215	7.00726	7.00822	7.01894	7.03737	7.1042	7.01607	7.11291	6.54969	6.61978	6.59662	6.55766	6.57087	6.5776	6.60264	6.60155	6.61573	6.65142	6.58067	6.62356
ILMN_1654858	7.00822	7.06611	7.14838	7.05656	7.04582	7.1289	7.09031	7.05986	6.98847	7.12163	6.7252	6.66926	6.73802	6.69518	6.70566	6.75463	6.61978	6.78806	6.70478	6.65028	6.66719	6.70832
ILMN_1654861	7.60771	7.66963	7.8329	7.67244	7.78056	7.85929	7.89186	7.58035	7.60704	7.65199	7.27855	7.38373	7.45421	7.37512	7.10062	7.33393	7.35422	7.04479	7.44015	7.31633	7.45805	7.17598
ILMN_1654864	7.1042	7.20471	7.11222	7.03095	7.06249	7.09276	7.07018	7.1042	7.11366	7.07224	6.79664	6.67084	6.72004	6.73576	6.75414	6.53947	6.71925	6.80758	6.69923	6.78264	6.80313	6.7196
ILMN_1654866	7.07224	7.12436	7.10231	7.13476	7.23982	7.22762	7.18215	7.11444	7.12163	7.08192	6.71264	6.61276	6.67481	6.68124	6.83597	6.72485	6.75516	6.66915	6.72762	6.69158	6.84621	6.8156
ILMN_1654870	7.17383	7.1042	7.09154	7.11291	7.05493	7.17141	7.13061	7.05986	7.1042	7.12163	6.59299	6.67575	6.62366	6.66341	6.59719	6.72616	6.70821	6.64317	6.7401	6.57749	6.6979	6.67909
ILMN_1654871	7.12163	7.1042	7.01218	7.14254	7.12074	7.11955	7.03737	7.09337	7.11366	7.09154	6.75295	6.6448	6.68238	6.60764	6.77432	6.99643	6.76669	6.86108	6.8208	6.76828	6.80879	6.77823
ILMN_1654875	8.85401	7.89487	7.2116	7.03095	7.02736	7.17141	7.18215	7.1042	7.13008	7.10291	6.91304	7.02943	6.84824	7.30095	8.27121	6.64272	6.94805	9.49977	7.24729	7.21808	7.11332	8.40328
ILMN_1654890	7.21211	7.18835	7.34555	7.19579	7.38115	7.51864	7.26855	7.22877	7.24685	7.31076	7.22647	6.98268	7.08318	7.41457	7.37288	7.57628	7.18485	7.44018	7.02909	7.06174	7.00158	7.35577
ILMN_1654893	7.66919	7.76582	7.65413	7.90341	7.78056	7.62454	7.96439	7.84666	7.78947	7.92382	7.84677	7.92829	7.99505	7.91838	8.13959	7.82504	7.96201	7.59166	7.86568	7.84064	7.62619	7.73779
ILMN_1654895	7.07224	7.13293	7.09154	7.06474	7.1289	7.11222	6.97138	7.11444	7.1042	7.16257	6.76778	6.59662	6.73662	6.67491	6.7616	6.69843	6.71538	6.68664	6.88136	6.71352	6.65534	6.7399
ILMN_1654899	6.99878	7.21986	7.11222	7.06474	7.1446	7.1289	7.32783	7.22877	7.18215	7.28643	6.75099	6.71824	6.91455	6.7938	6.86821	6.93604	6.88283	6.80879	6.81147	6.81917	6.74301	7.09294
ILMN_1654900	7.1446	7.11444	7.06249	7.15098	7.01894	7.15344	7.17273	7.09337	7.13872	7.16257	6.61536	6.6479	6.61276	6.71396	6.59575	6.6204	6.668	6.68787	6.56968	6.65936	6.86474	6.7738
ILMN_1654915	7.18691	7.18835	7.13008	7.1289	7.16965	7.33726	7.26855	7.41931	7.21794	7.40157	6.72892	6.68568	6.69014	6.66216	6.67198	6.74548	6.76797	6.81835	6.81864	6.71352	6.69618	6.76448
ILMN_1654916	7.05493	7.0857	7.08192	7.09529	7.06249	7.17141	7.22527	7.20005	7.12163	7.06122	6.94648	6.75414	6.7583	6.80655	6.86584	6.87518	6.67832	6.66763	6.67741	6.88916	6.86166	6.81987
ILMN_1654920	7.94165	7.67338	7.88453	7.83916	7.72892	7.49467	8.06342	7.67481	8.0028	7.51409	6.97057	6.86474	6.98177	6.98429	7.09475	6.88	6.96176	6.91532	6.93482	7.01845	6.83909	7.18886
ILMN_1654922	7.1042	7.13293	7.08192	7.09529	7.03737	7.11222	7.10231	7.1382	7.16965	7.15232	6.53897	6.75553	6.62886	6.68238	6.71352	6.86966	6.61678	6.64753	6.73002	6.67376	6.75806	6.70211
ILMN_1654939	8.9762	8.73123	8.77016	8.9506	9.03813	9.18946	9.25082	9.49445	9.4849	9.41136	9.58878	9.66661	9.38993	8.67876	10.2853	9.64075	9.29251	9.98372	10.0226	9.52799	9.55775	10.301
ILMN_1654942	7.1382	7.1042	7.16498	7.18215	7.1042	7.09276	7.17273	7.09337	7.23522	7.11291	6.83969	6.74605	6.75088	6.78021	7.0218	6.90566	6.84501	6.84353	6.72353	6.73696	6.70931	7.02288
ILMN_1654945	7.07224	7.11444	7.04304	7.15098	7.1382	7.15344	7.00642	7.02528	7.00726	7.09154	6.84733	6.78806	6.72605	6.68765	6.66936	6.79847	6.65188	6.81478	6.64563	6.84319	6.75958	6.66719
ILMN_1654946	7.62582	7.68057	7.41638	7.49672	7.45273	7.69679	7.61929	7.58035	7.51211	7.55869	7.19118	7.11276	7.22126	7.38414	6.82579	7.22661	7.51241	7.24579	7.2991	7.00794	7.34086	7.11129
ILMN_1654950	7.08068	7.06611	7.06249	7.06474	7.06249	7.00197	7.10231	7.09337	6.95782	7.03871	6.7163	6.62143	6.58938	6.64252	6.66145	6.61775	6.61978	6.59362	6.67481	6.52832	6.69618	6.77823
ILMN_1654965	7.13008	7.13293	7.07224	7.03095	7.2193	7.27801	7.09031	7.16257	7.08956	7.07224	6.7265	6.78662	6.76308	6.63748	6.71075	6.57614	6.83767	6.73651	6.69405	6.91627	6.71882	6.66385
ILMN_1654966	7.06249	7.04731	7.02231	7.08192	7.11291	7.17141	7.09031	7.1042	7.04526	7.2042	6.61032	6.71661	6.70454	6.74919	6.71991	6.75624	6.63247	6.67924	6.63538	6.77188	6.73696	6.74605
ILMN_1654973	7.03737	7.0857	7.15746	7.1289	7.2135	7.01894	7.14254	7.08192	7.12163	7.19299	7.0549	6.64305	6.83189	6.79569	6.7938	6.74548	6.82447	6.81589	6.69529	6.80398	6.74776	6.79995
ILMN_1654979	7.09753	7.06611	7.08192	7.06474	7.04582	7.08253	7.09031	7.03675	7.13008	7.12163	6.54267	6.61611	6.44714	6.5639	6.61752	6.52663	6.57237	6.55493	6.64563	6.59362	6.56955	6.54267
ILMN_1654980	7.16073	7.09467	7.00141	7.1042	7.1289	7.03737	7.07018	7.1042	7.19024	7.03871	6.73123	6.82714	6.84713	6.74548	6.77315	6.72212	6.80798	6.65672	6.60539	6.7185	6.76837	6.71295
ILMN_1654987	7.09031	7.14313	7.13008	7.22527	7.1289	7.13759	7.04793	7.26357	7.09674	7.13061	6.68529	6.68059	6.60132	6.65683	6.63453	6.79121	6.71538	6.68664	6.8164	6.86553	6.62517	6.62529
ILMN_1654997	7.13008	7.1042	7.11222	7.23584	7.08876	7.16257	7.31823	7.1289	7.13872	7.15232	6.93247	6.7651	6.63516	6.75516	6.7553	6.72902	6.77021	6.75048	6.88382	6.78362	6.64519	6.71641
ILMN_1654998	7.08068	7.13293	7.11222	7.06474	7.09529	7.1289	7.08068	7.11444	7.05266	6.99878	6.69024	6.77895	6.73263	6.63259	6.56281	6.64519	6.89742	6.62366	6.74279	6.64178	6.75229	6.65824
ILMN_1655011	7.60771	7.62454	7.69031	7.69905	7.47277	7.45703	7.31823	7.71314	7.72624	7.71719	7.26371	7.14885	7.13265	7.39494	7.08484	7.25101	7.37527	7.01757	7.17223	7.44355	7.02588	7.18709
ILMN_1655026	7.06249	7.06611	7.12074	7.03095	7.04582	7.10291	6.97138	7.1382	6.99798	7.12163	6.71824	6.77305	6.81589	6.5867	6.74419	6.71254	6.64519	6.70942	6.81024	6.80398	6.7416	6.80841
ILMN_1655039	7.09031	7.1042	7.15746	7.00726	6.9723	7.08253	6.97138	7.03675	7.09674	7.009	6.81589	6.59022	6.67731	6.70019	6.63281	6.88594	6.79631	6.66763	6.83597	6.67762	6.78986	6.88722
ILMN_1655045	7.09031	7.12436	7.22762	7.08956	7.11291	7.04793	7.04793	7.09337	6.9704	7.07224	6.63984	6.75088	6.75444	6.92273	6.62497	6.79569	6.70003	6.71681	6.78609	6.62058	6.80045	6.63236
ILMN_1655046	7.27602	7.16965	7.30823	7.32783	7.33662	7.44053	7.31823	7.28257	7.25313	7.2983	7.16255	6.81896	7.14996	7.25212	7.11292	7.87041	7.19584	7.55366	7.04394	7.22248	7.22099	7.37626
ILMN_1655047	7.09753	7.14313	7.17383	7.14254	7.09529	7.22762	7.11291	7.1382	7.2042	7.10291	6.75414	6.84513	6.88712	6.86108	6.79111	6.90566	6.86808	6.87049	6.98735	6.78705	6.77441	6.7883
ILMN_1655051	7.26903	7.28103	7.3295	7.20684	7.22706	7.17141	7.28789	7.11444	7.24685	7.16257	6.94911	6.8318	7.07374	7.32632	7.01065	6.85255	6.92498	7.01418	6.89199	7.07466	6.95725	6.75238
ILMN_1655052	7.05493	6.98544	7.04304	7.01434	7.15344	6.99048	7.12163	7.08192	7.08956	7.06122	6.76955	6.59502	6.77296	6.64252	6.72892	6.71641	6.77315	6.84733	6.60386	6.68529	6.80045	6.87105
ILMN_1655068	7.22364	7.20471	7.18215	7.29776	7.16965	7.17141	7.13061	7.07099	7.27602	7.12163	6.61775	6.75414	6.70942	6.70131	6.58259	6.61206	6.662	6.58116	6.66385	6.61016	6.72781	6.74919
ILMN_1655077	7.47899	7.43463	7.21794	7.19579	7.24582	7.1804	7.37666	7.26357	7.24039	7.34697	6.80541	6.62143	6.85144	6.88253	7.07746	6.76298	6.93851	6.78294	6.72212	6.69821	6.71559	7.1329
ILMN_1655080	7.08068	7.1042	7.10231	7.07224	7.02736	7.0109	7.09031	7.1042	7.05266	6.99878	6.51953	6.6991	6.73032	6.68765	6.53921	6.62658	6.67957	6.56822	6.61752	6.71352	6.60347	6.59266
ILMN_1655086	7.06249	6.99577	7.07224	6.96243	7.19888	7.01894	7.08068	6.98847	7.05266	6.92358	6.57776	6.61431	6.48073	6.66089	6.53921	6.57456	6.52598	6.57574	6.80776	6.56368	6.59982	6.639
ILMN_1655093	7.28583	7.11444	7.20062	7.17642	7.28789	7.41889	7.28789	7.32264	7.34062	7.45116	6.89597	6.80502	6.78515	6.92498	7.03152	6.84152	6.96857	6.81589	6.96788	6.73226	6.86334	6.86079
ILMN_1655095	7.09753	7.09467	7.02231	7.01434	7.08876	7.10291	7.04793	7.07099	7.04526	7.12163	6.80955	6.56516	6.82977	6.75402	6.7844	6.70566	6.73605	6.70942	6.67595	6.6942	6.60142	6.66558
ILMN_1655096	7.05493	7.16125	7.01218	7.1289	7.1382	7.04793	7.07018	7.11444	7.16965	7.18215	6.70454	6.63506	6.76669	6.90746	6.69126	6.69158	6.77915	6.89875	6.77305	6.80517	6.8554	6.71793
ILMN_1655100	7.09031	7.04731	7.10231	7.07224	7.15344	6.95396	7.11291	7.04731	7.03531	7.17141	6.65304	6.77305	6.75088	6.80541	6.66406	6.72902	6.6745	6.72605	6.6979	6.84602	6.55368	6.69394
ILMN_1655114	7.24685	7.19579	7.18215	7.27967	7.23472	7.17141	7.29776	7.1382	7.25796	7.12163	6.80437	6.83988	6.79664	6.85373	6.89334	6.76415	6.82875	6.90336	6.80313	6.95529	6.92813	6.84559
ILMN_1655117	7.52972	7.63392	7.37216	7.55936	7.57069	7.8542	7.57171	7.53298	7.69273	7.8014	7.27453	7.2968	7.5463	7.30656	6.95486	7.02491	7.36539	7.23239	7.21023	7.16216	7.01481	7.25159
ILMN_1655126	8.13689	9.24085	8.84212	8.64006	8.89168	9.55903	9.09715	9.035	9.28339	9.16309	8.67162	8.79484	8.87263	8.75089	8.9181	9.20368	9.08798	8.52623	9.10148	8.90016	8.90802	9.67713
ILMN_1655136	7.16073	7.09467	7.14838	7.15098	7.15344	7.04793	7.13061	7.16257	7.13008	7.11291	6.7587	6.7416	6.73662	6.66946	6.74776	6.7039	6.76905	6.83058	6.63129	6.71352	6.68664	6.73836
ILMN_1655137	7.36582	7.42913	7.36005	7.34183	7.5053	7.53205	7.61929	7.15174	7.37066	7.5493	7.0682	7.19352	7.31808	7.04205	8.06122	7.56076	7.10829	7.42443	7.17842	7.20871	6.96928	7.31956
ILMN_1655140	7.13008	7.05656	7.09154	7.07224	7.03737	7.09276	7.14254	7.08192	7.13008	7.07224	6.68071	6.8418	6.60896	6.65556	6.72485	6.71086	6.68206	6.7429	6.57439	6.61417	6.70931	6.64827
ILMN_1655144	7.09031	7.13293	7.26229	7.20684	7.1382	7.20684	7.17273	7.36061	7.16184	7.19299	6.7405	6.68221	6.72791	6.8127	6.73802	6.75059	6.72616	6.7429	6.7388	6.81917	6.7668	6.71489
ILMN_1655151	7.08068	7.19579	7.13008	7.12074	7.08068	7.18952	7.12163	7.07099	7.09674	7.22527	6.70454	6.73371	6.69014	6.85373	6.92642	6.71376	6.72747	6.78806	6.69271	6.70586	6.75516	6.75553
ILMN_1655154	11.2682	11.5572	11.4048	11.2707	11.4197	11.3131	11.3978	10.8181	11.7057	11.2458	11.4079	11.269	11.5207	11.3851	10.8778	11.0191	11.6202	10.9268	11.3714	11.4033	11.5363	10.5829
ILMN_1655155	7.16073	7.13293	7.16498	7.16965	7.1382	7.05656	7.17273	7.1042	7.06122	7.06122	6.85481	6.77305	6.68372	6.72364	6.76925	6.82098	6.65418	6.82733	6.76053	6.68765	6.75367	6.59468
ILMN_1655161	7.05493	7.03737	7.07224	7.07224	7.08876	7.08253	7.05986	7.05986	7.08956	7.16257	6.74419	6.66926	6.76552	6.7324	6.78566	6.81681	6.72293	6.78806	6.74388	6.66889	6.66915	6.72902
ILMN_1655162	7.1042	7.0762	7.07224	7.08192	7.07099	7.04793	7.08068	7.02528	7.11366	7.13061	6.7405	6.65458	6.79664	6.81068	6.70198	6.64807	6.67595	6.68937	6.6722	6.78149	6.80446	6.6856
ILMN_1655163	11.9831	11.6477	11.6222	11.5223	11.5113	11.7631	11.5223	11.619	11.6536	11.7631	11.6213	11.5427	11.6554	11.7312	12.8207	12.273	11.7015	11.7083	11.7175	11.6789	11.8673	11.7291
ILMN_1655165	7.78536	7.52596	7.69031	7.72349	7.81017	8.74318	7.67297	8.87878	7.65435	8.97291	7.07124	6.97592	6.89648	6.69518	7.06029	7.44342	6.81772	7.17636	7.21836	7.3882	7.22926	7.72089
ILMN_1655167	7.15292	7.13293	7.12074	7.16257	7.22706	7.04793	7.04793	7.09337	7.09674	7.12163	6.85583	6.81446	6.88401	6.82579	6.7416	6.61916	6.92926	6.68664	6.70053	6.67251	6.70433	6.93002
ILMN_1655170	7.11366	7.13293	7.03236	7.13476	7.1042	7.04793	7.14254	7.1382	7.11366	7.15232	6.65672	6.68221	6.69385	6.58794	6.63453	6.62968	6.64519	6.67291	6.67356	6.62176	6.64902	6.66008
ILMN_1655171	7.07224	6.98544	7.10231	7.06474	7.1382	7.07347	7.01743	7.17383	7.03531	7.11291	6.69631	6.84981	6.75444	6.80541	6.77072	7.03533	6.7416	6.82947	6.66926	6.77895	6.60742	6.76925
ILMN_1655177	9.2478	10.0176	9.76475	9.76986	9.79452	10.5272	9.71806	10.0287	9.83955	10.0348	9.51488	9.77948	9.92007	9.18152	9.37549	9.28434	9.56302	9.66893	9.39564	9.52584	9.46635	9.11988
ILMN_1655190	7.25796	7.18835	7.16498	7.22998	7.22706	7.35358	7.22527	7.22877	7.29776	7.18215	6.83577	6.81147	6.84713	6.85273	6.91406	6.85125	6.79747	6.90985	6.88897	7.01013	7.03413	6.78264
ILMN_1655191	7.79629	7.98476	7.90627	7.76971	7.9569	9.10843	7.971	8.72859	8.14686	8.65521	7.60632	8.41782	8.10688	7.46369	7.97166	8.37215	8.14352	8.50682	8.0714	7.57228	7.97518	7.82091
ILMN_1655194	7.3087	7.35492	7.3806	7.35573	7.45273	7.32783	7.35822	7.89766	7.31961	7.33662	7.19037	7.1079	7.17674	7.10732	7.19584	7.17704	7.10345	7.11373	7.12678	7.03121	6.89236	7.08626
ILMN_1655195	7.48296	7.49934	7.41037	7.5053	7.42913	7.45703	7.36704	7.50255	7.5053	7.42033	7.38521	7.19006	7.32189	7.38716	6.9066	7.0452	7.29519	7.09105	7.04728	7.19799	6.94155	7.15535
ILMN_1655196	7.18691	7.11444	7.14838	7.19579	7.11291	7.08253	7.04793	7.11444	7.13008	7.14066	6.61916	6.70566	6.69596	6.66477	6.72616	6.70566	6.71065	6.72715	6.72616	6.95918	6.67877	6.79111
ILMN_1655201	7.05493	7.16125	7.13989	7.03095	7.09529	7.05656	7.15232	7.08192	7.1042	7.06122	6.72333	6.75414	6.61026	6.69385	6.63453	6.69997	6.62849	6.697	6.69014	6.68044	6.68529	6.65166
ILMN_1655206	8.49373	8.70312	8.14745	8.43384	8.21169	8.91499	8.21068	9.52817	8.3236	9.20007	8.0878	8.44929	8.15248	8.09105	8.81136	9.43842	8.21664	9.33832	8.61179	8.29473	8.32185	9.55266
ILMN_1655210	7.04582	7.16965	7.14838	7.05656	7.00077	7.10291	7.02736	7.07099	7.06122	7.15232	6.69631	6.86474	6.75444	6.57237	6.6979	6.8288	6.68341	6.67438	6.75259	6.80945	6.77178	6.79539
ILMN_1655211	7.01743	7.0168	7.04304	7.01434	7.08068	7.01894	7.05986	7.03675	7.12163	7.17141	6.67853	6.65458	6.75563	6.79246	6.71873	6.89042	6.81058	6.77915	6.93874	6.72485	6.72191	6.71641
ILMN_1655218	7.00822	7.0762	7.12074	7.038	7.1289	6.98085	7.05986	7.1042	6.99798	7.22527	6.71376	6.6094	6.77296	6.66089	6.68745	6.5323	6.70821	6.67438	6.67481	6.80945	6.86777	6.61573
ILMN_1655225	7.55105	7.47658	7.55869	7.58741	7.53642	7.4257	7.56629	7.34183	7.48189	7.31076	7.13619	7.0105	7.07186	7.07913	6.89334	6.86966	7.02996	6.93667	7.05728	7.11461	6.90421	6.83484
ILMN_1655229	7.02736	7.09467	7.16498	7.01434	6.95626	7.15344	7.08068	6.97808	7.04526	7.13061	6.75647	6.69564	6.69385	6.77315	6.7416	6.78294	6.75248	6.73871	6.66385	6.7636	6.79881	6.6723
ILMN_1655230	7.1446	7.13293	7.12074	7.11291	7.19888	7.06474	7.04793	7.40157	7.14512	7.03871	6.78806	6.7416	6.66946	6.70509	6.77315	6.80115	6.7512	6.69453	6.65142	6.77895	6.73696	6.67909
ILMN_1655240	7.19385	7.06611	7.03236	7.12074	7.1382	7.05656	7.13061	7.18634	7.1042	7.05001	6.58139	6.79569	6.62647	6.69751	6.85154	6.71793	6.66572	6.75295	6.86936	6.82377	6.76552	6.76308
ILMN_1655241	7.1382	7.0762	7.06249	7.01434	7.09529	7.11955	7.07018	7.1289	7.01607	7.07224	6.86355	6.59191	6.6862	6.67757	6.75776	6.62658	6.60777	6.84353	6.86936	6.77072	6.72343	6.8726
ILMN_1655244	7.62582	7.47658	7.72967	7.59405	7.46873	7.54619	7.52025	7.1382	7.5053	7.24861	7.19735	6.94312	7.16106	7.11408	6.99216	7.32189	7.22831	7.17488	7.27551	7.44021	7.26058	6.94993
ILMN_1655245	7.15292	7.13293	7.21794	7.22998	7.1289	7.02807	7.33868	7.02528	7.29776	7.16257	6.75647	6.91904	6.9681	6.91674	6.90824	7.16895	6.68568	6.87683	6.88479	6.879	7.05999	6.94993
ILMN_1655250	7.1446	7.0168	7.10231	7.09529	6.98085	7.01894	7.11291	7.11444	7.13008	7.03871	6.86821	6.74919	6.73901	6.7859	6.70821	6.76925	6.7619	6.76171	6.76053	6.70842	6.82029	6.79995
ILMN_1655251	7.00822	7.0268	7.08192	7.02373	7.01894	7.10291	7.07018	7.1042	7.1042	7.05001	6.70577	6.58805	6.60896	6.64795	6.65672	6.62968	6.65188	6.63936	6.86808	6.64902	6.60909	6.73226
ILMN_1655261	7.68473	7.59793	7.62976	7.69905	7.72388	7.31961	7.70581	7.32264	7.73832	7.32319	7.06224	7.20532	7.21616	7.30752	6.8117	6.72902	7.00943	6.98566	6.86376	7.08278	6.95299	6.91598
ILMN_1655269	7.16073	7.13293	7.15746	7.12074	7.1382	7.11955	7.13061	7.1042	7.15344	7.03871	6.72781	6.85144	6.81589	6.70243	6.80923	6.75347	6.79529	6.67697	6.81511	6.65142	6.83605	6.72902
ILMN_1655272	7.11366	7.20471	7.15746	7.00726	7.01894	7.16257	7.15232	6.96454	7.16965	7.06122	6.7196	6.7429	6.67084	6.63259	6.8945	6.81835	6.82089	6.77305	6.80776	6.82601	6.83475	6.68735
ILMN_1655275	7.15292	7.1042	7.08192	7.12074	7.05493	7.06474	7.19299	7.1042	7.12163	7.06122	6.72892	6.78168	6.69261	6.74776	6.7405	6.8683	6.55954	6.72857	6.59033	6.67909	6.72932	6.59266
ILMN_1655283	7.18215	7.04731	7.11222	7.01434	7.18215	7.03737	7.31823	7.00141	7.36061	7.08192	6.92352	6.80826	6.78756	6.91148	6.64712	6.79847	6.70454	6.80224	6.84733	6.73446	6.66543	6.69231
ILMN_1655296	7.52972	7.29482	7.5758	7.35089	7.41838	7.48731	7.29776	7.34183	7.34062	7.2983	7.40967	7.41176	7.13265	7.42566	7.06446	7.03533	7.33231	7.09647	6.99659	7.13984	7.26684	6.94993
ILMN_1655306	7.11366	7.16965	7.08192	7.16257	7.23472	7.11222	7.10231	7.16257	7.15344	7.07224	6.72333	6.76171	6.72605	6.75048	6.75414	6.83453	6.70699	6.80502	6.72045	6.69553	6.88331	6.74419
ILMN_1655307	8.19577	8.17214	8.38849	8.13123	8.36621	8.37962	8.29657	8.8219	8.22009	8.52568	8.18207	8.43217	7.9983	8.08568	8.2841	8.54445	8.48843	8.51763	8.34495	8.21677	8.63568	8.0904
ILMN_1655311	8.12935	8.07476	8.06118	8.23339	8.27095	8.5197	8.61371	8.56493	8.13603	8.42623	8.0119	7.52258	7.94435	7.9926	7.85168	7.73551	7.73329	8.2755	7.96438	8.01605	7.75415	8.4138
ILMN_1655312	7.78906	7.84539	7.64716	7.75928	7.69031	7.49467	7.55105	7.15174	7.63281	7.22527	7.47965	7.41569	7.50219	7.55278	7.5582	6.89042	7.41214	6.98302	7.32467	7.26174	7.10458	7.13744
ILMN_1655316	10.1269	10.2221	9.35449	9.77689	9.25534	9.10641	9.29504	8.88913	9.52084	9.22791	8.94933	8.85844	8.87795	9.46222	8.88358	8.48261	8.68254	8.63568	8.63375	8.73489	8.58109	8.3581
ILMN_1655329	8.40798	8.18979	7.77708	8.16355	7.85929	7.97517	7.89186	8.79299	7.89186	8.46406	7.78797	7.63347	7.38978	7.87701	8.10232	8.31324	7.73247	8.38402	8.0042	7.86178	7.86477	8.51589
ILMN_1655330	7.1382	7.06611	7.05129	7.09529	7.08068	7.05656	7.13061	7.03675	7.00726	7.15232	6.79215	6.82714	6.81237	6.67887	6.7324	6.84152	6.64401	6.68166	6.88262	6.69553	6.70089	6.69886
ILMN_1655334	7.01743	7.11444	7.14838	7.01434	7.02736	7.02807	7.04793	7.04731	7.13008	7.07224	6.57638	6.86808	6.77432	6.77315	6.6979	6.92309	6.64679	6.72474	6.55147	6.73346	6.50848	6.68226
ILMN_1655340	10.5073	10.3332	10.5827	10.0431	10.7026	10.1744	10.1997	10.1165	10.3802	10.5067	9.792	9.50716	9.81775	9.79585	9.96593	9.5052	9.64075	9.61298	9.6067	9.70451	9.32933	10.1795
ILMN_1655341	7.09753	7.11444	7.11222	7.07224	7.12074	7.15344	7.10231	7.11444	7.12163	7.11291	6.65534	6.64634	6.75444	6.92159	6.75776	6.7493	6.77315	6.77546	6.814	6.70222	6.83475	6.72762
ILMN_1655347	7.16073	7.28103	7.2116	7.1289	7.01894	7.07347	7.12163	7.02528	7.13872	7.009	6.74647	6.89597	6.85144	6.80313	6.85502	6.83301	6.86376	6.79121	6.64305	6.69553	6.7416	6.70965
ILMN_1655348	7.17383	7.16965	7.22762	7.09529	7.16125	7.21794	7.13061	7.28257	7.08956	7.27394	6.69751	6.71352	6.70832	6.64658	6.95962	6.71376	6.72485	6.69576	6.71925	6.73576	6.72781	6.72762
ILMN_1655365	7.08068	7.06611	7.01218	7.09529	7.06249	7.35358	7.11291	7.26357	7.13872	6.99878	6.84733	6.80189	6.9681	6.69024	6.75034	6.70699	6.74647	6.95452	6.76435	6.75142	6.85373	6.84559
ILMN_1655374	7.07224	7.04731	7.02231	7.00726	7.09529	7.01894	7.07018	7.11444	7.11366	7.12163	6.80086	6.7429	6.70832	6.70783	6.56527	6.67062	6.77675	6.71065	6.79246	6.72846	6.61992	6.66385
ILMN_1655377	9.9359	9.70753	9.61554	9.77373	9.58173	9.99153	9.55444	10.2415	9.58934	10.1631	9.69674	9.81154	9.62486	9.88427	10.3043	10.1659	9.86541	10.2205	9.99925	10.0905	9.90108	10.2749
ILMN_1655380	7.11366	7.06611	7.17383	7.038	7.08876	7.04793	7.00642	7.18634	7.06122	7.13061	6.70942	6.6565	6.71295	6.79246	6.76797	6.68361	6.68454	6.7311	6.67356	6.77432	6.58283	6.72243
ILMN_1655382	7.24039	7.22762	7.15746	7.24039	7.23472	7.09276	7.05986	7.15174	7.14512	7.11291	6.75099	6.78032	6.72605	6.75712	6.83189	6.66636	6.79404	6.67051	6.74279	6.7185	6.80758	6.75402
ILMN_1655387	7.03737	7.16125	7.04304	7.01434	7.00822	7.07347	7.02736	7.00141	7.06122	7.07224	6.75752	6.69405	6.80646	6.69618	6.74419	6.69843	6.62708	6.80377	6.83839	6.78032	6.7324	6.74605
ILMN_1655403	7.09753	7.0268	7.02231	7.12074	7.06249	7.07347	7.15232	7.09337	7.1042	7.05001	6.69394	6.68568	6.67731	6.77432	6.73123	6.7616	6.72747	6.64317	6.66522	6.73576	6.70931	6.72092
ILMN_1655404	7.06249	7.14313	7.13989	7.18952	7.08068	7.11222	7.11291	7.04731	7.14512	7.11291	6.6889	6.77129	6.6722	6.70243	6.7405	6.54532	6.60264	6.7844	6.59628	6.78362	6.65237	6.70689
ILMN_1655405	7.08068	7.15232	7.04304	6.98912	7.07099	7.09276	7.04793	7.1289	7.16184	7.11291	6.84184	6.81589	6.98484	6.64795	6.98429	6.75059	6.82762	7.15013	6.891	6.94489	6.83341	6.71489
ILMN_1655408	7.12163	7.09467	7.04304	7.14254	7.12074	7.16257	7.12163	7.11444	7.06122	7.12163	6.74528	6.59891	6.66145	6.71154	6.62908	6.70699	6.78149	6.70211	6.63876	6.71352	6.72343	6.66008
ILMN_1655413	7.03737	7.05656	7.03236	7.1289	6.98085	7.24685	7.11291	7.15174	7.17642	7.13061	6.72212	6.6642	6.68507	6.60896	6.74419	6.76669	6.75248	6.69328	6.66089	6.72485	6.6722	6.68735
ILMN_1655414	7.77916	7.53711	7.42723	7.47199	7.17642	7.2983	7.14254	7.08192	7.28789	7.2042	7.16067	7.08458	7.1019	7.32329	7.80685	8.08577	7.06148	7.38459	7.46413	7.05765	7.68392	6.92633
ILMN_1655418	11.1019	11.0079	11.3018	11.3081	11.3926	11.5001	11.0344	11.6166	11.0318	11.3657	11.8048	11.1432	11.6037	11.9463	11.3652	11.6898	11.4008	11.4033	11.8397	11.6105	11.5885	12.0269
ILMN_1655421	7.13008	7.1042	7.07224	7.11291	7.07099	7.07347	7.14254	7.08192	7.06122	7.03871	6.56883	6.74605	6.62999	6.72243	6.61871	6.58029	6.61573	6.67799	6.61276	6.65534	6.66543	6.52075
ILMN_1655422	10.5001	10.9621	10.8597	10.7784	10.8296	11.4469	10.9805	11.443	10.8106	11.5223	10.4345	10.3632	10.5143	10.5105	11.0888	10.6896	10.665	11.276	10.862	10.6896	10.6712	10.8219
ILMN_1655426	7.15292	7.16125	7.30823	7.13476	7.07099	7.07347	7.14254	7.01218	7.06122	7.15232	6.67251	6.67731	6.61775	6.83067	6.68361	6.7775	6.70089	6.71308	6.72762	6.69945	6.66719	6.77823
ILMN_1655428	7.15292	7.19579	7.10231	7.15098	7.1446	7.19888	7.26855	7.1289	7.25313	7.08192	6.82009	6.94947	6.73521	6.88059	6.85502	7.00938	6.7619	6.95827	6.73501	6.62849	6.81891	6.78986
ILMN_1655429	7.34062	7.59261	7.30054	7.4257	7.2193	7.08253	7.20347	7.02528	7.24039	7.06122	6.99581	7.0521	6.89648	6.97792	6.93034	6.69564	6.87595	6.72715	6.80655	6.87203	6.75059	7.03212
ILMN_1655433	7.19385	7.263	7.18215	7.28583	7.27701	7.1804	7.2135	7.16257	7.09674	7.34697	7.01575	6.79121	6.96563	6.9293	6.86139	6.76533	6.95975	7.01575	6.98828	7.12099	7.19196	7.07632
ILMN_1655444	7.75082	7.75928	7.86521	7.78365	7.59793	7.89934	7.37666	7.75239	7.80019	7.99828	7.39177	7.13163	7.31931	7.60944	7.50204	7.25965	7.67839	7.35716	7.31603	7.70746	7.12703	7.41659
ILMN_1655446	7.09753	7.1042	7.03236	7.07224	7.04582	7.02807	7.05986	7.08192	7.1042	7.11291	6.73123	6.65137	6.76669	6.69024	6.63876	6.70699	6.64144	6.72212	6.73123	6.61536	6.6979	6.662
ILMN_1655449	7.05493	7.0268	7.04304	7.01434	7.08876	7.11222	7.08068	7.07099	6.98011	7.06122	6.83161	6.68059	6.72791	6.8246	6.87846	6.86434	6.77675	6.80625	6.72616	6.77895	6.65039	6.85941
ILMN_1655454	7.13008	7.16125	7.11222	7.09529	7.1382	7.07347	7.11291	7.04731	7.1042	7.03871	6.82617	6.67251	6.94052	6.80655	6.83189	6.7479	6.72892	6.80502	6.76797	6.70965	6.72631	6.70832
ILMN_1655462	7.18691	7.06611	7.09154	7.16965	7.19138	7.1446	7.11291	7.08192	7.04526	7.10291	6.77865	6.71661	6.73662	6.81578	6.86584	6.7479	6.76905	6.64902	6.70053	6.76468	6.71741	6.75059
ILMN_1655468	7.16819	7.19579	7.03236	7.05656	7.03737	7.17141	7.12163	7.18634	7.00726	7.17141	6.92007	6.87142	6.78986	6.66216	6.75414	6.66926	6.81874	6.70321	6.6722	6.81712	6.76415	6.73074
ILMN_1655469	7.95801	7.76971	7.75928	7.9074	7.89736	7.48023	7.81797	7.75239	7.862	7.73777	6.98673	6.75248	6.88136	7.15068	6.9638	6.71793	6.99384	6.85711	6.82203	6.91455	6.94929	7.17842
ILMN_1655474	6.97138	7.0762	6.99048	7.05656	7.03737	7.1289	6.97138	7.11444	7.03531	6.97873	6.59299	6.53131	6.5867	6.56968	6.6129	6.63247	6.64015	6.64473	6.72045	6.60742	6.62176	6.60479
ILMN_1655479	7.12163	7.04731	7.13008	7.07224	7.05493	7.1289	7.08068	7.1382	7.13872	7.07224	6.77938	6.69241	6.66145	6.75712	6.64712	6.8246	6.79995	6.78032	6.59915	6.68269	6.85245	6.79847
ILMN_1655482	7.91983	7.66493	7.58741	7.68217	7.57605	7.18952	7.54437	7.41931	7.49222	7.23584	7.33925	7.42119	7.57042	7.57033	7.19727	7.02309	7.10578	6.93565	7.08365	7.14375	6.92234	6.82264
ILMN_1655485	7.55594	7.44407	7.45378	7.4257	7.52666	7.67584	7.4264	7.82163	7.4395	7.82813	7.22126	7.08065	7.08318	7.19514	7.83549	7.77967	7.43864	7.68995	7.53031	7.51223	7.66001	7.54285
ILMN_1655489	7.12163	7.15232	7.09154	7.05656	7.02736	6.95396	7.04793	7.03675	7.02617	7.14066	6.65418	6.74021	6.65534	6.57798	6.80086	6.81835	6.65074	6.59901	6.67887	6.71741	6.64701	6.75059
ILMN_1655490	7.09031	7.14313	7.03236	7.08956	7.08876	7.10291	7.11291	7.1382	7.07099	7.07224	6.60176	6.60609	6.64025	6.62215	6.63153	6.65672	6.61809	6.70566	6.49859	6.63376	6.67731	6.85024
ILMN_1655497	11.4794	11.7951	11.625	11.6776	11.5093	10.8694	11.7868	11.7631	11.9617	11.5965	11.6359	11.721	11.5639	11.8456	11.734	10.6551	11.8808	11.9835	12.0518	11.5337	11.4778	11.6738
ILMN_1655498	7.11366	7.0857	7.10231	7.12074	7.16965	7.11955	7.11291	7.08192	7.14512	7.11291	6.74892	6.6889	6.68113	6.71641	6.77315	6.68226	6.71065	6.7197	6.7165	6.67909	6.70931	6.69024
ILMN_1655504	7.02736	7.04731	7.12074	7.02373	7.00077	6.98085	7.16257	6.96454	7.08956	7.07224	6.79664	6.72147	6.59058	6.70642	6.71209	6.83597	6.64283	6.77063	6.7618	6.88371	6.63376	6.63738
ILMN_1655509	7.16073	7.12436	7.21794	7.19579	7.29582	7.1289	7.12163	7.22877	7.1042	7.13061	6.88741	6.88185	6.90421	6.89662	6.84923	6.99125	6.85873	6.70821	6.88019	6.86176	6.81305	6.76797
ILMN_1655510	7.13008	7.11444	7.10231	7.11291	7.08876	7.11222	7.14254	7.08192	7.12163	7.08192	6.6889	6.68221	6.75444	6.76955	6.9066	6.62176	6.80935	6.67291	6.8127	6.65142	6.67595	6.7883
ILMN_1655517	7.16819	7.0857	7.09154	7.06474	7.03737	7.02807	7.01743	7.00141	7.1042	7.05001	6.66063	6.79404	6.62757	6.75402	6.7883	6.72343	6.71186	6.628	6.83171	6.78149	6.80446	6.86808
ILMN_1655519	7.09031	7.0168	7.06249	7.09529	7.06249	7.05656	7.13061	7.07099	7.03531	7.15232	6.65672	6.88371	6.77895	6.55653	6.80086	6.80975	6.66705	6.71681	6.65142	6.68529	6.62176	6.67595
ILMN_1655521	7.08068	7.0268	7.08192	7.08956	7.03737	7.06474	7.07018	7.07099	7.15344	7.06122	6.70454	6.75414	6.71173	6.69518	6.74419	6.62176	6.79404	6.81478	6.69014	6.77778	6.6722	6.87105
ILMN_1655525	7.13008	7.19579	7.23522	7.28789	7.18215	7.23667	7.18215	7.11444	7.17642	7.15232	6.82617	6.75248	6.91348	6.76298	6.63876	6.80717	6.82554	6.76426	6.83698	6.85493	6.76837	6.74776
ILMN_1655529	7.13008	7.09467	7.03236	7.07224	7.11291	7.06474	7.00642	7.09337	7.08956	7.13061	6.83577	6.98003	6.67595	6.72485	6.57346	6.84602	6.70089	6.68044	6.69126	6.79631	6.72045	6.78128
ILMN_1655532	7.04582	7.04731	7.03236	7.08192	7.04582	7.07347	7.12163	7.1382	7.00726	7.009	6.74776	6.78986	6.79881	6.77072	6.8156	6.73052	6.89159	6.84612	6.71793	6.8127	6.7416	6.76797
ILMN_1655537	6.96086	7.05656	7.09154	7.07224	7.08068	7.10291	7.11291	7.1382	7.12163	7.13061	6.6642	6.70078	6.75088	6.73446	6.88498	6.61206	6.77315	6.74528	6.66226	6.63511	6.831	6.7196
ILMN_1655545	7.18691	7.0857	7.16498	7.17642	7.1382	7.19888	7.22527	7.18634	7.16965	7.08192	6.84301	7.02349	6.86896	6.96139	6.71741	6.79847	6.82977	6.74151	6.86608	6.86731	6.79881	6.99917
ILMN_1655549	10.1378	9.9704	10.3681	10.0664	9.9704	9.25739	10.1529	9.58698	9.56216	9.73408	10.2099	9.62395	9.85726	9.84798	9.26742	9.63197	9.65421	9.24122	9.56728	9.76104	9.87052	9.46257
ILMN_1655551	7.08068	7.1042	7.11222	7.09529	7.17642	7.13759	7.13061	7.38115	7.14512	7.16257	6.70577	6.78168	6.65672	6.69261	6.9026	6.84301	6.75034	6.72715	6.83969	6.74548	6.76415	6.74419
ILMN_1655557	8.77457	8.64063	8.53721	8.72981	8.37699	7.74746	8.45746	7.56548	8.45333	7.70372	8.13845	8.2169	8.24258	8.10232	7.55516	7.7304	8.15701	7.46936	7.57005	8.05446	7.93372	7.12491
ILMN_1655561	12.6947	13.0285	12.7445	13.1882	13.0091	12.7149	12.701	12.6459	13.0045	12.7807	12.6629	12.2416	12.5394	12.6629	12.3468	12.4646	12.4371	12.3661	12.4329	12.7028	12.5394	12.2882
ILMN_1655563	7.43463	7.81306	7.69031	7.69905	7.79176	8.55519	7.91597	8.29799	7.70581	8.1966	7.54285	7.55226	7.89961	7.56988	7.32926	7.65283	7.50623	7.82469	7.76302	7.92769	7.72089	7.81395
ILMN_1655564	7.12163	7.11444	7.13008	7.08192	7.1042	7.17141	7.11291	7.17383	6.99798	7.17141	6.73501	6.77432	6.74776	6.77769	6.99026	6.89742	6.65418	6.9897	6.71133	6.93996	6.82772	6.89505
ILMN_1655565	7.13008	7.06611	7.09154	7.07224	7.03737	7.01894	7.01743	7.05986	7.08956	7.09154	6.60034	6.71508	6.76435	6.63748	6.83597	6.69997	6.76308	6.71813	6.74279	6.61775	6.66915	6.70211
ILMN_1655572	7.23522	7.32482	7.25313	7.2193	7.24582	7.2983	7.26855	7.16257	7.34952	7.10291	7.02759	6.99087	7.1467	7.03586	6.77315	6.82225	6.85873	6.78996	6.88136	6.98735	6.71396	6.73226
ILMN_1655577	7.57993	7.49934	7.37216	7.44967	7.35285	7.23667	7.49771	7.43836	7.72624	7.31076	7.13323	7.59723	7.25622	7.05864	6.89052	7.16422	7.33358	7.40079	7.03718	6.94583	7.60726	7.12491
ILMN_1655595	7.11366	7.23522	7.10231	7.09529	7.27701	7.17141	7.11291	7.17383	7.17642	7.18215	6.80086	6.82714	6.75444	6.72243	6.89742	6.76009	6.70566	6.97057	6.80313	6.79871	6.87255	6.75402
ILMN_1655605	7.13008	7.13293	7.08192	7.08192	7.17642	7.15344	7.11291	7.00141	7.07988	7.14066	6.86954	7.02349	6.6722	6.8246	6.71489	6.7844	6.68702	6.89643	6.71396	6.86731	6.84773	6.82733
ILMN_1655608	7.56676	7.57605	7.63507	7.36061	7.61288	7.35358	7.45378	7.40157	7.61159	7.15232	7.62396	7.79944	7.68469	7.50274	7.25138	7.46743	7.60106	7.34865	7.43424	7.40596	7.0124	6.978
ILMN_1655610	7.16819	7.12436	7.15746	7.13476	7.19138	7.06474	7.19299	7.11444	7.1042	7.2042	6.67731	6.82569	6.75224	6.72762	6.71209	6.75752	6.72892	6.81589	6.72892	6.70842	6.88185	6.76448
ILMN_1655611	7.1042	7.09467	7.10231	7.22998	7.12074	7.11222	7.08068	7.08192	7.13008	7.15232	6.82105	6.69036	6.72222	6.79995	6.75904	6.82744	6.67721	6.84866	6.89307	6.79215	6.75958	6.71154
ILMN_1655612	8.41276	8.46973	8.53369	8.213	8.46243	9.67462	8.44231	9.29731	8.30315	9.22228	8.66728	8.99165	8.88977	9.03701	10.0557	10.2205	8.91488	10.1652	9.37808	9.03762	9.78643	9.79172
ILMN_1655613	7.1382	7.03737	7.08192	7.038	7.08876	7.07347	7.09031	7.1289	7.05266	7.11291	6.64807	6.76317	6.69843	6.67617	6.78691	6.7416	6.65074	6.68394	6.68579	6.79529	6.7703	6.7738
ILMN_1655614	7.20528	7.13293	7.07224	7.15098	7.12074	7.07347	7.23522	7.24582	7.17642	7.11291	6.70832	6.6889	6.81237	6.70509	6.82947	6.81384	6.7405	6.79995	6.87636	6.81805	6.83221	6.83354
ILMN_1655615	7.16073	7.17898	7.10231	7.1289	7.17642	7.09276	7.12163	7.01218	7.07988	7.05001	6.72092	6.77129	6.63772	6.58538	6.6301	6.76797	6.82875	6.84866	6.7071	6.62323	6.80758	6.73226
ILMN_1655622	9.83591	10.0024	9.66372	10.106	10.0069	9.9176	9.7451	10.3834	10.2346	10.8921	9.90206	9.27705	9.27853	9.49323	9.44995	9.89215	9.89215	10.2113	10.2205	9.98331	9.81058	10.2385
ILMN_1655623	7.08068	7.06611	7.07224	7.13476	7.12074	7.10291	7.04793	7.18634	7.06122	7.09154	6.65534	6.68735	6.7619	6.62497	6.68226	6.69158	6.76905	6.72474	6.63876	6.77188	6.72045	6.75238
ILMN_1655624	7.06249	7.03737	7.10231	7.05656	7.11291	7.05656	7.11291	7.08192	7.11366	7.06122	6.73836	6.78806	6.77296	6.71991	6.62637	6.5776	6.80673	6.65809	6.69271	6.75681	6.65723	6.73836
ILMN_1655625	7.47899	7.51409	7.48983	7.44676	7.31212	7.1446	7.4264	7.36061	7.41838	7.10291	7.33011	7.45336	7.23479	7.17153	6.93883	6.86139	7.03284	7.08365	6.88382	6.99304	7.1258	6.97358
ILMN_1655626	7.15292	7.06611	7.09154	7.13476	7.07099	7.09276	7.15232	7.1289	7.07099	7.08192	6.67595	6.65799	6.78275	6.78909	6.76298	6.67356	6.72747	6.82335	6.75925	6.63119	6.80614	6.8127
ILMN_1655632	7.13008	7.1042	7.10231	7.1042	7.03737	7.0109	7.10231	7.02528	7.12163	7.19299	6.73836	6.62497	6.64795	6.66341	6.60645	6.68361	6.61809	6.56822	6.67741	6.84319	6.57102	6.60479
ILMN_1655635	8.55753	8.48572	8.35041	8.31809	8.52177	7.82813	8.48786	7.66054	8.50239	7.71719	8.37138	7.52506	7.72631	8.53656	7.31183	7.27095	7.81699	7.51625	7.67839	7.78897	7.69702	7.36839
ILMN_1655637	7.09753	7.12436	7.13989	7.08956	7.03737	7.02807	7.08068	7.09337	7.11366	7.06122	6.76212	6.93482	6.78515	6.81578	6.94816	6.81835	6.67062	6.91406	6.68316	6.86986	6.73096	6.80841
ILMN_1655642	7.24039	7.13293	7.13008	7.12074	7.11291	7.08253	7.00642	7.24582	7.15344	7.18215	6.77769	6.64634	6.76807	6.63876	6.67198	6.77188	6.72616	6.69923	6.64434	6.6889	6.68529	6.92633
ILMN_1655644	7.18691	7.19579	7.10231	7.24039	7.08876	7.09276	7.23522	7.05986	7.21211	7.15232	6.73576	7.09689	6.9175	6.83394	6.72762	6.89199	6.88392	6.84733	6.83839	6.86176	6.78367	6.7399
ILMN_1655645	7.46935	7.63022	7.89093	7.74746	7.90548	7.51248	7.78482	7.50255	7.89971	7.5493	7.54979	7.7955	7.44179	7.52307	7.37083	7.30434	7.85657	7.39348	7.64648	7.58074	7.59403	7.31911
ILMN_1655654	8.03108	7.95287	8.01586	7.96278	8.23302	7.76614	8.33339	8.11845	8.01338	7.68728	8.27667	8.36651	8.34982	8.21918	8.03554	8.78651	8.44466	7.68089	8.22382	8.55446	8.73272	7.86419
ILMN_1655659	7.1042	7.18835	7.09154	7.09529	7.1289	7.15344	7.09031	7.40157	7.21211	7.14066	6.80086	6.80655	6.76945	6.71154	6.87536	6.697	6.82651	6.85205	6.7388	6.74548	6.75516	6.78986
ILMN_1655663	7.40422	7.24861	7.34555	7.37134	7.42913	7.51864	7.30823	7.32264	7.45907	7.32319	6.94254	6.88732	7.00641	6.89884	7.00178	7.19138	6.9423	7.00194	6.85273	6.81601	6.75059	6.82885
ILMN_1655664	7.03737	7.03737	7.12074	7.15098	7.1289	6.97138	7.12163	7.08192	7.07099	7.11291	6.64455	6.68735	6.66248	6.64134	6.69126	6.63387	6.79631	6.78032	6.79111	6.83221	6.68044	6.65004
ILMN_1655684	7.63704	7.66014	7.86521	7.44676	7.62644	7.45703	7.4264	7.60866	7.62181	7.42033	7.75593	7.65615	7.96637	7.44083	7.2213	7.1539	7.44719	7.43412	7.97341	7.32312	7.64597	7.22544
ILMN_1655690	7.01743	7.1042	7.09154	7.04793	7.09529	7.03737	7.00642	6.98847	7.1042	7.11291	6.67138	6.70566	6.68879	6.71396	6.58393	6.63855	6.81977	6.61026	6.65142	6.65534	6.60347	6.71489
ILMN_1655694	8.14432	8.40587	8.1689	7.99013	8.33872	7.92827	8.25512	8.34597	8.62729	7.95878	8.41893	8.71971	8.59282	8.20099	8.06634	8.67123	8.58239	8.54701	8.32517	8.29662	8.34018	7.88294
ILMN_1655701	7.09031	7.12436	7.10231	7.15098	7.17642	7.11222	7.10231	7.07099	7.16184	7.03871	6.64113	6.72631	6.66946	6.71772	6.76797	6.68071	6.61978	6.68529	6.801	6.74647	6.58067	6.83354
ILMN_1655702	8.05709	7.45378	7.57037	7.61333	7.66054	7.43463	7.41889	7.40157	7.42314	7.46068	7.13515	6.86808	6.99847	7.15527	6.874	6.79712	6.92374	6.90834	6.98087	7.06404	6.80313	6.92032
ILMN_1655710	8.80837	8.31782	8.37657	7.88789	8.04088	8.56347	7.83355	8.13537	8.06661	8.71156	6.94425	6.84981	6.71528	6.9293	6.9577	6.90058	6.68341	6.92926	6.82203	6.92121	6.82622	6.99075
ILMN_1655711	7.1446	7.1042	7.13989	7.13476	7.1042	7.05656	7.01743	7.1042	7.06122	7.05001	6.73706	6.70852	6.72605	6.58538	6.61871	6.71376	6.69024	6.80224	6.7401	6.66468	6.71075	6.7883
ILMN_1655713	7.06249	7.04731	7.07224	7.04793	7.09529	6.97138	7.07018	7.09337	7.07988	7.06122	6.66926	6.62822	6.62517	6.6889	6.668	6.79121	6.63656	6.72715	6.74279	6.71086	6.60347	6.65511
ILMN_1655715	7.04582	7.16125	7.06249	7.038	7.01894	7.08253	7.04793	6.98847	7.03531	7.06122	6.56111	6.57201	6.5655	6.60634	6.58515	6.71086	6.63376	6.55631	6.60253	6.57062	6.66543	6.50483
ILMN_1655720	7.27902	7.31409	7.27849	7.29425	7.25796	7.44914	7.45378	7.20005	7.17642	7.33662	7.2018	7.08065	7.11748	7.16695	7.20408	7.18387	7.11847	7.19799	7.0706	7.06112	7.07107	7.20259
ILMN_1655722	7.09031	7.15232	7.06249	7.08192	7.07099	7.03737	7.07018	7.05986	7.18215	7.06122	6.7859	6.76009	6.83403	6.66341	6.65281	6.66216	6.71538	6.79601	6.77178	6.77778	6.76105	6.70832
ILMN_1655733	7.34062	7.24861	7.21794	7.27602	7.15344	7.1289	7.2135	7.07099	7.32482	7.02964	6.68316	6.69742	6.79664	6.84319	6.76426	6.68361	6.689	6.80377	6.74528	6.72092	6.75367	6.65824
ILMN_1655734	7.77916	7.48238	7.6047	7.51454	7.63704	7.72349	7.58825	8.11845	7.69709	7.97125	6.88673	6.77569	6.91651	6.94377	6.91969	7.05438	6.85235	7.18091	6.89875	6.96205	6.88331	7.12184
ILMN_1655740	7.11366	7.09467	7.17383	7.14254	7.16965	7.15344	7.05986	7.17383	7.12163	7.14066	6.76542	6.74919	6.94835	6.77652	6.82579	6.72485	6.74776	6.77063	6.75787	6.75414	6.75958	6.74419
ILMN_1655748	7.1446	6.99577	7.01218	7.1042	7.1289	7.17141	7.05986	7.1042	7.2294	7.01894	6.66189	6.7651	6.86387	6.88253	6.92273	6.65237	6.82447	6.71439	6.81147	6.82815	6.75958	6.67909
ILMN_1655754	7.22364	7.18835	7.15746	7.25082	7.31897	7.28789	7.34697	7.34183	7.33563	7.24861	6.87518	7.03117	6.93762	6.80758	6.8332	7.04351	6.99766	6.81355	6.86157	6.87794	6.86474	6.80841
ILMN_1655755	7.16819	7.06611	7.14838	7.20171	7.08876	7.15344	7.15232	7.22877	7.09674	7.19299	6.73966	6.80025	6.76807	6.79694	6.68879	6.7493	6.77315	6.78555	6.77546	6.70222	6.91913	6.67731
ILMN_1655758	7.07224	7.20471	7.07224	7.26229	7.12074	7.04793	7.11291	7.20005	7.17642	7.11291	6.80313	6.65458	6.85255	6.57491	6.51831	6.69271	6.73605	6.80377	6.79111	6.81375	6.75516	6.69886
ILMN_1655765	10.1599	9.84628	9.81674	9.42777	9.72533	8.91013	9.33346	9.17371	9.50197	8.78768	9.89095	9.18968	9.72951	9.9458	8.8046	8.85468	9.20292	9.02642	9.21199	9.37201	8.90701	8.85732
ILMN_1655766	7.16073	7.03737	7.06249	7.03095	7.1382	7.06474	7.04793	7.07099	7.06122	7.01894	6.69271	6.62497	6.58805	6.79778	6.70699	6.69271	6.75034	6.77778	6.8127	6.73696	6.73696	6.74605
ILMN_1655771	7.05493	7.11444	7.11222	7.16257	7.17642	7.11955	7.13061	7.17383	7.12163	7.09154	6.73966	6.70852	6.7497	6.72134	6.65132	6.75059	6.71186	6.70066	6.69126	6.69821	6.68848	6.65511
ILMN_1655773	7.1382	7.16965	7.28583	7.16965	7.04582	7.25796	7.08068	7.17383	7.18215	7.14066	6.58794	6.70222	6.72474	6.89742	6.72762	6.7493	6.74776	6.78806	6.84291	6.79871	6.70586	6.76925
ILMN_1655780	7.17383	7.16125	7.02231	7.08956	7.19138	7.13759	7.16257	7.09337	7.2042	7.03871	6.73706	6.7651	6.79778	6.79121	6.64827	6.71641	6.91674	6.83462	6.71264	6.84501	6.77915	6.77072
ILMN_1655783	7.06249	7.06611	7.10231	7.16257	7.2135	7.13759	7.00642	7.1042	7.06122	7.07224	6.7429	6.92498	6.88808	6.79694	6.86453	6.88897	6.76669	6.79871	6.75925	6.77432	6.82194	6.76009
ILMN_1655788	7.09753	7.16125	7.03236	7.08956	7.1289	7.04793	7.11291	7.1042	7.12163	7.06122	6.7587	6.65936	6.66493	6.69518	6.73002	6.66063	6.73479	6.72857	6.72212	6.7553	6.7668	6.70211
ILMN_1655789	7.09753	7.0762	7.11222	7.18215	7.09529	6.97138	7.01743	7.02528	7.02617	7.03871	6.7405	6.79871	6.75325	6.70243	6.83189	6.79424	6.71186	6.68529	6.69126	6.70222	6.71254	6.68735
ILMN_1655796	7.13008	7.16965	7.17383	7.16965	7.1289	7.04793	7.10231	7.16257	7.2042	7.14066	6.92273	6.97107	6.67481	6.78232	7.06838	6.83301	6.75388	6.81242	6.72616	6.67128	6.86474	6.80437
ILMN_1655809	7.09031	7.11444	7.14838	7.16257	7.20528	7.1446	7.22527	7.1382	7.18215	7.13061	6.90737	6.89393	6.80159	6.80655	6.7416	6.7401	6.82335	6.74905	6.79496	6.78986	6.67387	7.13998
ILMN_1655819	7.00822	7.04731	7.09154	7.02373	7.08068	7.06474	7.03737	7.08192	7.07988	7.16257	6.54715	6.54703	6.54734	6.53341	6.55027	6.63855	6.59458	6.64902	6.6722	6.72846	6.64356	6.60659
ILMN_1655821	7.39106	7.36005	7.55869	7.32482	7.38115	7.48023	7.47899	7.62181	7.27602	7.46976	7.08451	7.05418	6.84612	7.19698	6.95962	7.43743	7.01481	7.07893	7.17039	7.05454	7.24044	7.32221
ILMN_1655827	7.18215	7.24861	7.24582	7.25082	7.30823	7.36061	7.15232	7.46935	7.24039	7.25947	6.83263	6.71186	6.73901	6.77072	6.81795	6.85412	6.85448	6.64317	6.68869	6.63645	6.64519	6.67387
ILMN_1655842	7.19385	7.13293	7.18215	7.13476	7.08068	7.17141	7.27902	7.20005	7.16965	7.14066	6.74776	6.74605	6.67595	6.79569	6.86821	6.8127	6.73479	6.71559	6.84501	6.77072	6.88803	6.70832
ILMN_1655844	7.16819	7.12436	7.11222	7.20684	7.05493	7.3087	7.23522	7.1042	7.13008	7.24861	7.0549	6.80826	6.92755	6.93019	6.92509	7.03533	6.92633	6.98078	6.97334	6.89014	6.84189	6.83354
ILMN_1655849	7.1042	7.13293	7.16498	7.16965	7.1382	7.13759	7.04793	7.04731	7.11366	7.06122	7.04205	6.79121	6.77178	6.75712	6.93604	6.87693	6.78149	6.86108	6.88586	6.76828	6.79444	6.662
ILMN_1655860	7.01743	7.14313	7.25313	7.09529	7.16125	7.10291	6.99577	7.17383	7.13872	7.16257	6.77652	6.70852	6.51313	6.70131	6.91969	6.75463	6.67291	6.69328	6.84392	6.8567	6.74301	6.7587
ILMN_1655863	7.16073	7.0857	7.11222	7.08192	7.08068	7.24685	7.08068	6.97808	7.00726	7.09154	6.69158	6.62329	6.74892	6.6129	6.60645	6.79121	6.63772	6.71439	6.69529	6.78986	6.65039	6.75553
ILMN_1655864	7.15292	7.0268	7.21794	7.15098	7.2135	7.2983	7.15232	7.2135	7.16184	7.14066	6.84184	6.6991	6.83493	6.79778	7.30106	6.73371	6.86474	6.97296	6.80313	6.81917	6.65039	6.66008
ILMN_1655867	7.04582	7.00578	7.10231	7.08192	7.08068	7.03737	7.07018	7.05986	7.07988	7.17141	6.77188	6.78032	6.79664	6.70131	6.79847	6.85412	6.81977	6.78555	6.81731	6.75034	6.72191	6.70211
ILMN_1655868	7.18215	7.15232	7.20062	7.16257	7.18215	7.1446	7.27902	7.11444	7.06122	7.09154	6.76094	6.73555	6.67356	6.67491	6.68226	6.66636	6.57237	6.58805	6.77178	6.62708	6.66543	6.62133
ILMN_1655871	7.16073	7.11444	7.24582	7.22998	7.18215	7.15344	7.19299	7.32264	7.2294	7.18215	6.77188	6.80313	6.75444	6.86108	6.87693	6.71519	6.75388	7.07186	6.89199	6.83767	6.77441	7.04841
ILMN_1655876	7.66054	7.63752	7.5053	7.67244	7.51629	7.44053	7.80367	7.8784	7.62582	7.78012	7.22126	7.53625	7.37126	7.47526	7.4144	7.33393	7.69197	7.78626	7.58146	7.65767	7.7337	7.54898
ILMN_1655880	7.1446	7.05656	7.11222	7.08192	7.19138	7.08253	7.24685	7.05986	7.13872	7.02964	6.90166	7.10019	6.71295	6.88331	6.87133	7.07287	6.75624	6.72715	6.891	6.81037	6.7703	6.98484
ILMN_1655884	8.2157	8.1936	8.60799	8.45147	8.41276	9.21967	8.38759	9.50029	8.30905	9.30055	8.44488	8.18365	8.54549	8.2481	10.3274	10.4155	8.83611	9.57637	9.13643	8.51392	8.806	9.38453
ILMN_1655892	7.09753	7.0762	7.08192	7.13476	7.11291	7.01894	7.09031	7.07099	7.12163	7.16257	6.66926	6.71054	6.54036	6.7583	6.76542	6.8584	6.78955	6.7197	6.81731	6.73966	6.77178	6.71295
ILMN_1655893	7.12163	7.04731	7.13989	7.15431	7.1289	7.10291	7.18215	7.01218	7.07099	7.14066	6.80086	6.76171	6.69596	6.78909	6.70423	6.64923	6.66326	6.89469	6.81147	6.76573	6.68044	6.62133
ILMN_1655894	7.11366	7.11444	7.14838	7.18952	7.03737	7.21794	7.10231	7.07099	7.17642	7.12163	6.67138	6.89393	6.71904	6.81375	6.72762	6.75197	6.75034	6.90336	6.73123	6.80831	6.72045	6.70965
ILMN_1655904	7.03737	7.06611	7.01218	7.07224	7.03737	7.10291	7.08068	7.04731	7.04526	7.01894	6.79664	6.68221	6.66493	6.87555	6.74776	6.80975	6.67721	6.66522	6.69405	6.5358	6.82622	6.81692
ILMN_1655905	7.09753	7.16125	7.16498	7.07224	7.09529	7.04793	7.13061	7.11444	7.13008	7.31076	6.64923	6.70222	6.73142	6.84501	6.65799	6.73741	6.73479	6.75187	6.71133	6.80398	6.75367	6.74776
ILMN_1655906	7.1382	7.0762	7.13008	7.13476	7.06249	7.15344	7.15232	7.24582	7.11366	7.14066	6.79111	6.82998	6.82051	6.8116	6.82428	6.86139	6.93716	6.81138	6.84071	6.65936	6.74627	6.91282
ILMN_1655909	7.11366	7.0762	7.07224	7.09529	7.19888	7.1289	7.11291	7.16257	7.14512	7.14066	6.66189	6.80826	6.784	6.7311	6.7616	6.70121	6.7429	6.82592	6.64434	6.72222	6.68664	6.62886
ILMN_1655913	7.60273	7.40422	7.53755	7.52972	7.36982	7.48731	7.28789	7.32264	7.52025	7.62302	6.82009	6.71824	6.99504	6.89976	6.75142	6.74419	6.71427	6.65418	6.8127	6.85891	6.6269	6.80304
ILMN_1655915	7.09753	7.16965	7.15746	7.24685	7.1446	7.0109	7.13061	7.07099	6.99798	7.16257	6.70832	6.68394	6.5655	6.72616	6.7553	6.71793	6.71793	6.69328	6.64563	6.70586	6.55718	6.78128
ILMN_1655921	7.86862	7.71356	7.33868	7.69636	7.28375	7.23667	7.39384	7.1289	7.35492	7.09154	7.21731	7.05418	7.0638	7.37669	7.14209	7.14023	7.04623	7.03812	7.00641	6.92121	6.88028	6.85502
ILMN_1655922	8.13689	7.84947	8.25454	8.04955	8.31056	8.86524	8.30905	8.6427	8.40241	8.59562	7.90547	7.90552	7.86794	8.02291	7.80685	7.78832	8.16364	8.44263	7.97341	8.86476	8.28918	8.48843
ILMN_1655924	7.49171	7.35492	7.30054	7.33334	7.29582	7.24685	7.26855	7.11444	7.25796	7.09154	6.91503	6.86139	6.73802	6.96598	6.77188	6.69564	6.86808	6.84492	6.8418	6.87693	6.86474	6.73226
ILMN_1655930	7.25313	7.16125	7.27849	7.23584	7.24582	7.23667	7.09031	7.16257	7.28103	7.38115	6.72333	6.61611	6.72111	6.7687	6.86966	6.63689	6.69024	6.73501	6.87419	6.80831	6.80446	6.76171
ILMN_1655932	7.12163	7.0857	7.08192	7.08192	7.03737	7.09276	7.15232	7.1042	7.06122	7.13061	6.75099	6.57201	6.73521	6.81578	6.73956	6.77895	6.7619	6.94557	6.7165	6.66889	6.68664	6.75553
ILMN_1655935	8.66106	8.7712	8.51685	8.50449	8.46027	7.78482	8.89046	8.103	8.75163	7.91082	8.46678	9.07548	8.85792	8.58625	7.9386	8.21548	8.66346	7.89253	8.25017	8.38	8.28918	7.45342
ILMN_1655938	7.07224	7.06611	7.17383	7.09529	7.15344	7.10291	7.36704	7.05986	7.1042	7.08192	6.73576	6.76955	6.60896	6.71396	6.80086	6.73371	6.64817	6.68529	6.79986	6.71606	6.72191	6.70965
ILMN_1655940	7.15292	7.16125	7.19138	7.11291	7.1042	7.11222	7.05986	7.09337	7.07988	7.06122	6.71054	6.70078	6.80531	6.64134	6.71991	6.78705	6.76797	6.70066	6.76669	6.70089	6.76415	6.67062
ILMN_1655941	7.20528	7.17898	7.42033	7.22527	7.23472	7.27801	7.10231	7.17383	7.25796	7.11291	6.85481	6.78806	6.82733	6.79246	6.6301	6.76533	6.90537	6.79601	6.88897	6.90402	6.86936	7.08326
ILMN_1655949	7.11366	7.13293	7.04304	7.05656	7.16965	6.98085	7.04793	7.05986	7.17642	7.07224	6.62989	6.78662	6.60132	6.56686	6.68496	6.72616	6.70821	6.63269	6.78032	6.64346	6.72045	6.71295
ILMN_1655950	7.25313	6.96454	7.09154	7.12074	6.98085	7.1804	7.2135	7.07099	7.2042	7.15232	6.72443	6.74919	6.78158	6.8021	6.82846	6.90219	6.75624	6.7868	6.89577	6.83221	7.08975	6.92032
ILMN_1655952	11.5136	11.4156	11.1122	11.1842	11.6424	11.5335	11.5588	11.585	11.4219	11.3926	11.7871	12.2209	11.9216	11.574	11.3811	11.4908	11.9613	11.7663	11.4163	10.6327	11.8456	11.0314
ILMN_1655955	7.06249	7.04731	7.00141	7.06474	7.08876	7.17141	7.13061	7.09337	7.15344	7.05001	6.7252	6.60285	6.9284	6.69618	6.61573	6.79121	6.55954	6.68394	6.74528	6.67128	6.73696	6.7399
ILMN_1655961	7.33616	7.40422	7.5455	7.34183	7.56548	7.51248	8.12195	7.18634	7.89971	7.44053	7.16154	6.978	7.04512	7.10062	6.86966	7.05055	7.12376	6.87683	7.01819	7.26174	7.07661	6.85941
ILMN_1655974	7.22877	7.19579	7.22762	7.28789	7.26406	7.10291	7.26855	7.28257	7.16965	7.33662	6.85868	6.7776	6.89648	7.03247	6.85879	6.7416	7.2245	6.76542	6.84733	6.85004	6.92234	6.7196
ILMN_1655980	7.08068	7.09467	7.11222	7.04793	7.09529	7.28789	7.18215	7.15174	7.06122	7.10291	6.62859	6.78358	6.76552	6.7324	6.75142	7.064	6.8438	6.77546	6.77675	6.7859	6.7324	6.66008
ILMN_1655983	7.08068	7.0857	7.04304	7.1289	7.08068	7.06474	7.2135	7.03675	7.21211	7.09154	6.75414	6.8418	6.74647	6.77432	6.71209	6.68071	6.75516	6.70942	6.63399	6.69553	6.72191	6.61916
ILMN_1655985	7.09753	7.0168	7.21794	7.12074	7.19888	7.19888	7.25796	7.08192	7.24685	7.19299	6.96462	6.68735	6.79444	6.97103	7.32236	6.93151	6.90997	6.63046	6.85941	6.77664	6.86936	6.8918
ILMN_1655987	8.57335	9.00512	8.99611	8.43621	9.01452	10.2306	9.07608	8.47074	8.84685	8.64529	9.23644	8.51763	9.14156	9.56578	8.24714	8.12799	8.72981	8.7062	8.87936	8.56832	8.56241	8.58008
ILMN_1655990	7.75468	8.06715	8.03871	7.82778	7.42314	8.31809	8.06342	8.18656	7.97333	8.0423	7.76443	7.94602	8.20099	7.75694	7.83647	8.12039	8.07396	7.9464	7.58888	7.59166	7.7271	7.60381
ILMN_1656011	7.58367	7.15232	7.20062	7.08192	7.19888	7.39616	7.19299	7.18634	7.1042	7.34697	8.05195	6.80655	7.55714	7.19963	8.42533	7.39924	7.22142	7.43055	8.95975	7.0007	8.35648	8.691
ILMN_1656015	7.05493	7.09467	6.98085	7.07224	7.06249	7.0109	7.05986	7.07099	7.01607	7.02964	6.54538	6.63656	6.69484	6.60024	6.59058	6.5323	6.6745	6.62517	6.79246	6.64346	6.67387	6.76308
ILMN_1656016	7.88949	7.93127	8.00196	8.11424	7.78056	7.32783	8.17079	8.6427	7.82987	7.44053	7.66991	8.06991	7.73087	7.41121	8.28324	8.3667	7.93675	8.44415	8.42258	7.93956	7.96717	8.45922
ILMN_1656017	7.21211	7.20471	7.08192	7.03095	7.1042	7.10291	7.13061	7.15174	7.19024	7.2042	7.025	6.69564	7.05848	6.87988	6.81937	6.99458	6.84713	6.7938	6.8208	6.86986	6.75669	6.978
ILMN_1656019	7.15292	7.03737	7.11222	7.15098	7.08876	7.19888	7.27902	7.20005	7.18215	7.24861	6.77315	6.86808	6.64144	6.63748	6.71741	6.83857	6.73966	6.84353	6.77546	6.74776	6.68206	6.79539
ILMN_1656021	7.1446	7.05656	7.22762	7.09529	7.07099	7.07347	7.10231	7.11444	7.01607	7.13061	6.56883	6.82846	6.70345	6.72134	6.76925	6.56339	6.71295	6.76053	6.67072	6.76009	6.75229	6.68226
ILMN_1656024	7.12163	7.0762	7.14838	7.08192	7.11291	7.16257	7.08068	7.09337	7.06122	7.06122	6.77652	6.7385	6.76552	6.7938	6.72762	6.72343	6.59325	6.7429	6.78264	6.8567	6.74441	6.75712
ILMN_1656033	7.09031	7.19579	7.07224	7.1042	7.08068	7.11955	7.13061	7.09337	7.11366	7.06122	6.81795	6.89023	6.6722	6.88741	6.75414	6.7479	6.73605	6.76298	6.6979	6.71741	6.831	6.73226
ILMN_1656040	6.96086	7.13293	7.09154	6.98912	7.08876	7.0109	7.01743	7.00141	7.06122	7.07224	6.59575	6.76171	6.7583	6.78232	6.81937	6.61206	6.70089	6.697	6.70842	6.65799	6.6269	6.66385
ILMN_1656042	8.0745	7.92667	8.09504	8.44811	7.88009	7.19888	8.19234	7.36061	8.08942	7.37027	7.9106	8.18702	8.11586	8.37085	7.06029	7.37432	7.66393	7.21844	7.48642	7.78847	7.28275	7.34701
ILMN_1656045	7.09753	7.24097	7.19138	7.13476	7.1382	7.17141	7.12163	7.11444	7.25313	7.10291	6.92719	6.78168	6.95733	6.94377	6.81049	6.89884	6.99892	6.91131	6.94816	6.83331	6.9177	6.8487
ILMN_1656051	7.11366	7.1042	7.13008	7.09529	7.09529	7.07347	7.05986	7.1382	7.04526	7.10291	6.79111	6.67893	6.69261	6.92755	6.71606	6.73741	6.89265	6.85711	6.79246	6.91922	6.83475	6.89014
ILMN_1656052	7.08068	7.16965	7.09154	7.08956	7.1382	7.00197	7.16257	7.08192	7.02617	7.09154	6.82105	6.82407	6.71793	6.6889	6.70699	6.75197	6.7512	6.7324	6.74528	6.77546	6.73096	6.62133
ILMN_1656057	7.21211	7.18835	6.98085	7.18952	7.24582	7.56629	7.12163	7.45315	7.12163	7.71719	6.92471	6.80502	6.94769	6.99242	8.55847	7.20513	6.8946	8.36609	7.20699	6.87794	7.85176	7.29782
ILMN_1656066	8.61917	8.58379	8.64424	8.40315	8.54056	8.87891	8.49323	8.81307	8.58276	8.56317	8.84646	9.23532	8.97035	9.16026	9.43862	9.08102	9.39107	9.16998	8.93217	8.66436	9.20848	8.74631
ILMN_1656069	7.22877	7.25686	7.12074	7.13476	7.16125	7.20684	7.17273	7.05986	7.12163	7.11291	6.76308	6.90192	6.91282	6.86808	6.77915	6.67762	6.93342	6.801	6.73642	6.76955	6.65534	6.81407
ILMN_1656073	7.04582	7.06611	7.10231	7.14254	7.1042	7.1289	7.09031	7.1042	7.1975	7.19299	6.60583	6.75414	6.70577	6.75624	6.65523	6.80856	6.78264	6.69328	6.59167	6.71352	6.64701	6.72605
ILMN_1656074	7.09031	7.18835	7.01218	7.02373	7.09529	7.00197	7.12163	7.08192	7.16965	7.05001	6.55675	6.64981	6.55368	6.64252	6.49043	6.51174	6.56083	6.44466	6.59915	6.59047	6.74627	6.71489
ILMN_1656079	7.29942	7.29482	7.16498	7.33334	7.26406	7.21794	7.31823	7.15174	7.3981	7.28643	7.21948	7.02943	7.05063	7.07759	6.9448	7.36203	7.14422	7.19584	7.07569	7.28294	7.16229	7.3637
ILMN_1656082	14.251	14.3845	14.2722	14.375	14.2866	14.3072	14.2722	14.2646	14.1987	14.0414	13.9581	14.0818	13.9474	13.9527	13.8749	13.9944	13.9204	13.7802	13.9265	14.0782	14.1471	13.8493
ILMN_1656084	7.01743	7.03737	7.09154	7.09529	7.08068	7.07347	7.14254	7.08192	7.02617	7.09154	6.67138	6.6448	6.66705	6.63748	6.6862	6.79712	6.64015	6.63139	6.5867	6.63119	6.72485	6.66719
ILMN_1656088	7.1382	7.18835	7.13989	7.1042	7.16125	7.07347	7.13061	7.1042	7.13872	7.18215	6.71154	6.69036	6.67989	6.77188	6.7883	6.88	6.76308	6.70321	6.8021	6.84794	6.77178	6.81138
ILMN_1656097	7.01743	7.0268	7.06249	7.13476	7.1382	7.11222	7.11291	7.05986	7.08956	7.02964	6.72333	6.70566	6.558	6.70376	6.76009	6.58951	6.7324	6.65809	6.74905	6.80517	6.79588	6.69231
ILMN_1656110	7.20005	7.12436	7.23522	7.11291	7.11291	7.06474	7.04793	7.1042	7.15344	7.14066	6.68071	6.90585	6.78756	6.79995	6.93604	6.88897	6.75752	6.70211	6.90297	6.83221	6.74441	6.90622
ILMN_1656111	8.5874	9.01412	8.57095	8.4619	9.29371	9.80698	9.36179	9.80155	8.66764	9.78552	9.15142	9.52072	9.46257	8.98572	9.8455	8.8348	8.92752	9.89792	8.81413	8.81082	8.83814	9.62452
ILMN_1656118	7.04582	7.11444	7.02231	7.12074	7.04582	7.06474	7.08068	7.08192	6.95782	6.95626	6.80655	6.7324	6.90613	6.8127	7.11456	6.88741	6.81772	6.74151	6.73371	7.00272	6.68361	7.06515
ILMN_1656123	7.13008	7.17898	7.05129	7.08192	7.19888	7.02807	7.15232	7.08192	7.08956	7.18215	6.7196	6.65458	6.67731	6.70243	6.80655	6.7429	6.79404	6.76426	6.78032	6.58318	6.75516	6.71295
ILMN_1656129	7.22364	7.35492	7.16498	7.20171	7.2193	7.10291	7.18215	7.17383	7.25313	7.23584	6.77432	6.6448	6.86286	6.76171	6.69261	6.97203	6.7512	6.80377	6.83171	6.75034	6.9177	6.75712
ILMN_1656131	7.1446	7.15232	7.14838	7.08956	7.06249	7.17141	7.22527	7.09337	7.13008	7.15232	6.76778	6.66594	6.59662	6.71044	6.78041	6.63689	6.74647	6.94557	6.69014	6.74776	6.73696	6.88722
ILMN_1656132	6.98085	7.14313	7.06249	6.97138	7.08876	7.05656	7.00642	7.02528	7.13008	7.06122	6.77938	6.68735	6.69945	6.8246	6.703	6.69405	6.76435	6.74528	6.74528	6.67251	6.63516	6.68389
ILMN_1656134	8.7193	7.79538	8.42111	8.38716	8.17939	8.00013	8.42292	8.60108	8.3585	8.61928	7.58584	7.79278	7.50334	7.72484	7.49984	7.76547	7.59026	7.56067	7.86526	8.21138	7.75805	7.68218
ILMN_1656136	8.17939	8.48339	8.405	8.78615	8.55216	8.49323	8.6427	8.95959	8.4897	8.52568	8.33732	7.82823	8.24846	8.551	8.77741	8.40474	7.956	8.45176	8.2656	8.53622	7.97151	8.9618
ILMN_1656137	7.23522	7.1042	7.16498	7.16965	7.17642	7.18952	7.20347	7.07099	7.21794	7.2042	6.67138	6.86296	6.72343	6.70912	6.66936	6.72343	6.8555	6.7324	6.7388	6.70222	6.72191	6.75402
ILMN_1656139	7.09753	7.14313	7.06249	7.30728	7.07099	7.16257	7.15232	7.20005	7.16965	7.10291	6.73371	6.69405	6.83403	6.78806	6.68071	6.94805	6.7405	6.82846	6.83058	6.76573	6.95299	6.8127
ILMN_1656144	7.18215	7.15232	7.14838	7.2135	7.16125	7.18952	7.36704	7.2135	7.18215	7.12163	7.0517	6.82225	6.81107	6.9069	6.85879	7.16114	7.1174	6.97754	6.90076	6.86808	6.80045	7.11744
ILMN_1656145	7.64233	7.8546	7.72349	7.73592	7.65199	7.28789	7.74989	7.03675	7.73459	7.39106	7.38387	7.25152	7.32562	7.55912	6.76298	6.91006	7.2939	7.00194	6.94993	7.1139	7.05446	7.08479
ILMN_1656149	7.21211	7.0762	7.18215	7.2193	7.1446	7.08253	7.12163	7.2135	7.19024	7.03871	6.68418	6.78358	6.84291	6.99304	6.90421	6.78579	6.71538	6.99581	6.73123	6.78362	6.86166	6.7196
ILMN_1656159	7.29942	7.22762	7.26903	7.2574	7.15344	7.19888	7.13061	7.15174	7.24039	7.25947	7.05039	7.01794	7.13611	7.02727	6.98429	6.82098	7.12715	6.93321	6.97551	7.00794	6.92646	6.81407
ILMN_1656165	8.39902	8.20136	8.37162	8.47109	8.4154	8.76747	8.09828	8.6069	8.64779	8.65521	8.28165	8.33823	8.25743	8.33908	8.73106	8.6811	8.24274	8.72328	8.12461	8.35482	8.16468	8.5265
ILMN_1656169	7.00822	7.0857	7.05129	7.03095	6.98085	7.07347	7.04793	7.04731	7.07988	7.06122	6.63984	6.75712	6.63139	6.63748	6.61992	6.6722	6.63656	6.58259	6.6979	6.54041	6.63198	6.74419
ILMN_1656170	7.12163	7.13293	7.06249	7.04793	7.03737	7.15344	7.02736	7.1042	7.22364	7.19299	6.62757	6.69742	6.75224	6.69895	6.7429	6.7616	6.74548	6.84733	6.81731	6.79215	6.82947	6.86954
ILMN_1656171	7.15292	7.13293	7.20062	7.16965	7.16965	7.26664	7.15232	7.17383	7.17642	7.25947	6.90076	6.87142	6.73662	6.9026	6.82428	6.88741	7.02583	6.86777	6.8208	6.69945	6.78545	6.86218
ILMN_1656176	7.1382	7.18835	7.14838	7.15431	7.1042	7.15344	7.01743	7.17383	7.18215	7.22527	6.68529	6.86808	6.67731	6.8116	6.66695	6.88741	6.7429	6.64473	6.8208	6.6889	6.76837	6.82592
ILMN_1656181	7.21211	7.03737	7.17383	7.04793	7.05493	7.10291	7.09031	7.09337	7.07099	7.18215	6.79444	6.74021	6.78158	6.77188	6.80189	6.67606	6.70566	6.69328	6.77305	6.73696	6.67062	6.71793
ILMN_1656182	7.22364	7.16965	7.30054	7.14254	7.25082	7.25796	7.13061	7.2135	7.19024	7.2042	6.80841	7.23105	7.02229	6.95623	6.89334	6.8246	6.7619	7.00363	6.97334	6.85583	6.83221	6.81138
ILMN_1656184	7.4395	7.62099	7.9361	7.50409	7.67297	7.25796	7.54437	7.79127	7.53045	7.53982	7.21132	7.24912	7.40159	7.37387	7.26143	7.60211	7.24158	7.25086	7.41839	7.36857	7.42047	7.5856
ILMN_1656185	7.73459	7.57069	7.81177	7.4257	7.72892	8.28844	7.971	8.07581	7.60346	8.16355	7.97487	7.88533	7.85766	7.87916	8.33044	8.12568	7.82945	8.31959	8.14011	8.05243	8.04909	8.79515
ILMN_1656186	7.1042	7.15232	7.24582	7.23584	7.15344	7.26664	7.31823	7.17383	7.17642	7.2042	6.87085	6.85311	6.88586	6.97446	6.82579	6.94304	6.69886	6.86927	6.81147	6.92022	6.96797	6.9175
ILMN_1656187	7.00822	7.06611	7.16498	7.09529	7.07099	7.20684	7.11291	7.08192	7.03531	7.18215	6.68206	6.68221	6.74031	6.72762	6.67198	6.76533	6.83857	6.7197	6.57114	6.70365	6.66543	6.68735
ILMN_1656189	7.1042	7.19579	7.13989	7.11291	7.08068	7.08253	7.08068	7.15174	7.07099	7.03871	6.72212	6.89199	6.76669	6.7324	6.668	6.78294	6.70454	6.84612	6.6679	6.75904	6.74441	6.77072
ILMN_1656192	7.1382	7.16125	7.15746	7.2135	7.19888	7.08253	7.11291	7.11444	7.2042	7.2042	6.69518	6.76317	6.7497	6.69024	6.76925	6.78579	6.77124	6.68664	6.59167	6.8127	6.51975	6.537
ILMN_1656193	7.04582	7.14313	7.04304	7.13476	7.06249	7.18952	7.16257	7.03675	7.14512	7.10291	6.80437	6.7324	6.71406	6.79121	6.54835	6.63855	6.65799	6.75295	6.71264	6.7553	6.74627	6.75553
ILMN_1656194	7.09753	6.98544	7.03236	7.08192	7.06249	7.00197	7.00642	7.04731	7.1042	7.06122	6.78986	6.75553	6.69385	6.79246	6.63153	6.53794	6.62598	6.63936	6.81967	6.70089	6.58503	6.69024
ILMN_1656196	7.76614	7.77418	7.52446	7.57945	7.48419	7.5053	7.48731	7.32264	7.61159	7.5493	7.40675	7.32182	7.34008	7.31232	7.51332	7.62436	7.39888	7.41513	7.66947	7.27171	7.62561	7.32947
ILMN_1656199	7.09031	7.0268	7.24582	7.11291	7.1382	7.1446	7.19299	7.1042	7.14512	7.27394	6.7553	6.72474	6.86079	6.66719	6.75286	6.68361	6.72616	6.7949	6.79111	6.67376	6.66915	6.58371
ILMN_1656200	7.08068	7.11444	7.06249	7.07224	7.06249	7.04793	7.14254	7.04731	6.94122	7.07224	6.76542	6.70222	6.81456	6.7324	6.75658	6.7479	6.71065	6.7844	6.75787	6.74419	6.72485	6.93002
ILMN_1656201	6.99878	7.09467	7.12074	7.03095	7.1042	6.96389	7.03737	7.07099	7.07988	7.11291	6.72443	6.74441	6.70345	6.68372	6.62215	6.69271	6.65188	6.67187	6.7887	6.67128	6.75958	6.70509
ILMN_1656208	7.09031	7.05656	7.01218	7.09529	7.1446	7.15344	7.04793	7.02528	7.18215	7.07224	6.75197	6.89808	6.75967	6.58185	6.63984	6.76797	6.64144	6.63405	6.63876	6.61667	6.75516	6.64495
ILMN_1656218	7.08068	7.0762	7.04304	7.07224	7.01894	7.09276	7.08068	7.07099	7.09674	7.03871	6.5003	6.61978	6.68507	6.63748	6.5931	6.68071	6.63376	6.62664	6.66926	6.52338	6.7703	6.61916
ILMN_1656221	7.13008	7.06611	6.98085	7.08956	7.1382	7.06474	7.10231	7.03675	7.07988	7.009	6.55516	6.68568	6.69843	6.52426	6.68496	6.69564	6.66705	6.63269	6.67481	6.64902	6.67731	6.79111
ILMN_1656225	7.15292	7.17898	7.08192	7.12074	7.15344	7.11222	7.14254	7.26357	7.13008	7.14066	6.84392	6.80189	6.77178	6.74776	6.83745	6.76797	6.79404	6.92017	6.72485	6.92255	6.82194	6.79995
ILMN_1656232	7.12163	7.28789	7.14838	7.14254	7.12074	7.10291	7.14254	6.95265	7.12163	7.05001	6.86821	6.68059	6.68745	6.82377	6.7324	6.79712	6.81407	6.80224	6.7416	6.63936	6.71882	6.6889
ILMN_1656233	12.7445	13.034	12.3398	12.8365	12.2365	12.701	12.6405	12.35	12.4073	12.2793	11.1465	11.2643	11.101	10.8426	10.988	10.1328	11.664	11.8433	11.5862	10.7742	12.0089	10.6559
ILMN_1656242	7.09031	7.05656	7.10231	7.07224	7.15344	7.07347	7.02736	7.1042	6.9704	7.14066	6.69158	6.54009	6.79111	6.74776	6.61752	6.67481	6.87811	6.74647	6.78756	6.65142	6.64701	6.63738
ILMN_1656248	7.11366	7.25686	7.18215	7.1042	7.03737	7.09276	7.12163	7.15174	7.18215	7.15232	6.50932	6.80826	6.70222	6.76764	6.56059	6.69158	6.72747	6.64178	6.71519	6.73226	6.73542	6.55416
ILMN_1656250	7.21211	7.0762	7.12074	7.14254	7.16125	7.22762	7.04793	7.15174	7.1042	7.13061	6.82539	7.13369	6.87339	6.74658	6.7844	6.8246	6.71793	6.7311	6.76669	6.76468	6.65397	6.82264
ILMN_1656251	7.17383	7.05656	7.13008	7.1042	7.15344	7.17141	7.07018	7.1289	7.12163	7.09154	6.80313	6.70566	6.69261	6.7859	6.65523	6.697	6.71538	6.85592	6.6679	6.7553	6.75669	6.89982
ILMN_1656254	7.32482	7.40422	7.18215	7.33334	7.44598	7.36061	7.30823	7.18634	7.36582	7.34697	6.98808	6.9079	6.80014	7.03152	6.94816	6.81384	6.76435	6.86249	6.90297	6.98302	7.0947	7.34908
ILMN_1656257	7.09031	7.12436	7.11222	7.12074	7.1042	7.10291	7.05986	7.09337	7.11366	7.16257	6.65936	6.71186	6.75967	6.78128	6.68071	6.68361	6.72375	6.66763	6.79986	6.63936	6.79279	6.7868
ILMN_1656266	7.01743	6.99577	7.08192	7.12074	7.02736	7.02807	7.20347	7.01218	7.04526	7.06122	6.55516	6.59891	6.59818	6.53756	6.64827	6.53033	6.5639	6.53854	6.54697	6.69945	6.61431	6.7399
ILMN_1656274	8.0185	7.85929	8.0294	7.99013	8.00245	7.8542	8.08339	7.56548	8.00668	8.12976	8.22565	8.17559	7.9745	8.41362	8.29181	8.01216	8.43826	8.71814	8.43775	8.63141	8.57922	8.27714
ILMN_1656280	7.11366	7.09467	7.10231	7.02373	7.19138	7.09276	7.12163	7.22877	7.11366	7.09154	6.76778	6.62822	6.65028	6.6889	6.64217	6.7479	6.79631	6.81958	6.83839	6.70089	6.65534	6.78986
ILMN_1656285	7.67338	7.44914	7.77708	7.4998	7.43463	7.32783	7.57993	7.28257	7.54585	7.60704	6.87708	6.98268	6.69385	6.77769	6.8156	6.77315	6.85987	6.87049	6.83698	6.90824	6.74441	6.88858
ILMN_1656287	7.5053	7.89487	7.67244	7.75506	8.46947	8.68168	7.16257	8.26102	7.73832	7.86559	7.66518	7.07615	8.4247	7.1478	9.14213	8.23545	8.295	9.22321	8.45034	7.37248	9.42002	8.19644
ILMN_1656291	7.09031	7.13293	7.23522	7.09529	7.18215	7.08253	7.16257	7.08192	7.18215	7.13061	6.80955	6.64634	6.86759	6.94892	6.8464	6.73741	6.74776	6.81242	6.82305	6.76689	6.69158	6.80304
ILMN_1656292	10.1523	9.66035	9.85421	9.48973	9.84206	9.86573	9.77689	10.3681	9.83591	10.1444	8.10011	7.89472	7.83509	7.94744	8.63412	7.63679	8.1196	8.41653	8.35925	8.36536	8.19118	8.32235
ILMN_1656293	7.43463	7.37027	7.45378	7.44676	7.48419	7.16257	7.53676	7.43836	7.34952	7.27394	7.01096	6.84513	7.06731	7.06446	6.82579	7.03718	7.02822	6.69453	7.01893	7.0875	6.82947	6.9175
ILMN_1656297	9.17489	9.07633	9.02018	8.93066	8.96505	8.58656	8.68588	8.55112	8.91926	8.89655	10.0669	9.72325	9.6067	9.88719	8.84367	9.67504	9.6088	9.13938	9.40619	9.61485	9.51892	9.49005
ILMN_1656300	7.53755	8.17214	7.42723	7.26563	7.42913	7.64399	7.56629	7.26357	7.40368	7.63106	7.57522	8.25307	8.15798	8.05512	7.19437	7.10484	7.54591	7.4105	7.53306	7.25129	7.29069	7.45648
ILMN_1656301	7.08068	7.11444	7.07224	7.08192	7.08068	7.05656	7.08068	7.16257	7.04526	7.08192	6.73576	6.71186	6.76945	6.67491	6.71991	6.8246	6.71925	6.78158	6.57614	6.6889	6.64356	6.75712
ILMN_1656303	6.99878	7.11444	7.05129	7.08192	7.07099	7.08253	7.08068	7.04731	7.07988	7.01894	6.56995	6.62143	6.57992	6.6129	6.56962	6.68071	6.64923	6.50458	6.55631	6.65418	6.62859	6.82733
ILMN_1656310	7.1382	7.04731	7.03236	7.20171	7.16965	7.11222	7.02736	7.09337	7.27602	7.27394	6.7553	6.84357	7.02857	6.79778	6.81937	6.87693	6.68702	6.75414	6.85373	6.77305	6.74441	6.84291
ILMN_1656315	7.45378	7.39893	7.37216	7.34647	7.33662	7.36061	7.44711	7.72582	7.48189	7.48023	7.20041	7.52156	7.29919	7.15171	7.37355	7.46428	7.1357	7.27425	7.38518	7.24787	7.33282	7.12491
ILMN_1656316	7.22364	7.38115	7.47945	7.30123	7.20528	7.35358	7.29776	7.17383	7.29221	7.10291	7.27028	7.28332	7.24647	7.25647	6.92273	6.94805	7.06241	7.00984	7.10716	7.10805	6.78705	7.12812
ILMN_1656318	7.1042	7.03737	7.01218	7.09529	7.07099	6.98085	7.12163	7.03675	7.08956	7.12163	6.69394	6.76171	6.73662	6.57798	6.72892	6.84713	6.80446	6.76807	6.67481	6.73814	6.76415	6.70965
ILMN_1656321	7.1042	7.13293	7.11222	7.06474	7.16125	7.11955	7.12163	7.15174	7.14512	7.15232	6.70355	6.62822	6.87236	6.72243	6.79847	6.96112	6.7416	6.71813	6.82428	6.75414	6.94592	6.7196
ILMN_1656325	7.1382	7.0168	7.15746	7.07224	7.08068	7.1289	7.10231	6.98847	7.11366	7.009	6.71054	6.81446	6.61667	6.74919	6.58926	6.69158	6.63247	6.65418	6.76435	6.7185	6.70433	6.74776
ILMN_1656327	7.11366	7.0857	7.26903	7.07224	7.16965	7.23667	7.09031	7.18634	7.24685	7.15232	6.99466	6.89808	6.96371	6.94377	6.97979	7.17072	6.83857	6.84733	6.74905	7.25919	6.90147	7.09778
ILMN_1656330	7.13008	7.0168	7.12074	7.06474	7.12074	7.22762	7.08068	7.1042	7.13008	7.14066	6.64807	6.81589	6.72923	6.78474	6.79712	6.63538	6.74419	6.68937	6.81864	6.62708	6.82335	6.73226
ILMN_1656335	7.80041	7.89487	7.51248	8.0072	7.70821	8.38512	7.93488	8.25415	7.76614	8.70706	8.0297	7.96118	7.88049	8.14142	8.97713	8.70461	8.21433	8.45635	8.24714	8.33591	8.42489	8.88557
ILMN_1656338	7.12163	7.0762	7.06249	7.08956	7.1382	6.99048	7.03737	7.15174	7.09674	7.10291	6.75647	6.91683	6.77063	6.66842	6.7405	6.71925	6.79404	6.81003	6.66522	6.83462	6.81589	6.70689
ILMN_1656342	7.11366	7.15232	7.13989	7.04793	7.1289	7.15344	7.15232	7.1042	7.16184	7.22527	6.7429	6.94528	6.75088	6.78128	6.80189	6.78032	6.77432	6.68044	6.64563	6.75776	6.71396	6.73836
ILMN_1656344	7.13008	7.18835	7.15746	7.15098	7.07099	7.05656	7.05986	7.1382	7.13872	7.13061	6.70222	6.76669	6.88223	6.69618	6.7883	6.71254	6.78483	6.82592	6.68735	6.7416	6.78705	6.93482
ILMN_1656361	7.5619	7.6021	7.65413	7.55075	8.12733	9.75832	7.85498	9.68797	7.76095	9.59516	7.44099	7.9069	8.07478	7.24787	8.86688	9.90579	8.77283	9.3417	8.84544	8.17858	9.18269	8.37152
ILMN_1656364	7.09031	7.11444	7.13989	7.04793	7.1382	7.15344	7.05986	7.05986	7.09674	7.09154	6.70089	6.77129	6.73263	6.78128	6.69014	6.7208	6.85448	6.72353	6.70577	6.66341	6.59277	6.64495
ILMN_1656368	7.29482	7.28103	7.23522	7.29425	7.23472	7.25796	7.39384	7.26357	7.45907	7.38115	7.09006	7.09105	7.00127	6.90058	7.0747	6.88145	7.21836	7.25579	6.8878	7.10648	7.15272	7.25774
ILMN_1656369	7.13008	7.15232	7.10231	7.02373	7.07099	7.10291	7.18215	7.24582	7.15344	7.18215	6.66926	6.77129	6.60777	6.64923	6.7553	6.6861	6.7405	6.62002	6.69923	6.64495	6.6269	6.77992
ILMN_1656371	7.09031	7.0857	7.08192	7.1289	7.05493	7.02807	7.14254	7.07099	7.16184	7.12163	6.67251	6.62143	6.7608	6.65683	6.67575	6.75347	6.78955	6.84981	6.82793	6.74548	6.6979	6.72443
ILMN_1656372	7.1446	7.18835	7.23522	7.17642	7.01894	7.09276	7.23522	7.1042	7.14512	7.13061	7.17449	6.73706	7.08732	6.88808	7.00344	7.11935	7.19584	6.93667	6.91348	6.93874	7.03134	6.76308
ILMN_1656373	7.03737	7.0168	7.13989	7.07224	7.1382	6.99048	7.01743	7.08192	7.08956	7.16257	6.83857	6.73555	6.73802	6.69751	6.75776	6.73052	6.71672	6.61026	6.891	6.69553	6.82029	6.76009
ILMN_1656376	7.11366	7.16965	7.22762	7.20171	7.17642	7.21794	7.26855	7.41931	7.22364	7.2042	6.77938	7.15429	6.81712	6.75402	6.77315	6.81384	6.76552	6.83597	6.84291	6.72485	6.73371	6.94816
ILMN_1656378	7.15292	7.21986	7.13989	7.12074	7.22706	7.48023	7.12163	7.1289	7.1975	7.19299	6.73123	6.63139	6.55516	6.67617	6.58515	6.52426	6.72747	6.78158	6.48566	6.69821	6.60909	6.77537
ILMN_1656379	7.1042	7.05656	7.07224	7.18215	7.1042	7.01894	7.03737	7.07099	7.12163	6.99878	6.73706	6.76669	6.64413	6.66089	6.84923	6.75197	6.63516	6.69923	6.56527	6.86986	6.64178	6.73074
ILMN_1656380	7.20528	7.31409	7.23522	7.2135	7.1289	7.24685	7.33868	7.16257	7.14512	7.22527	6.92905	6.89393	6.99504	7.03926	6.89334	6.85412	6.85661	6.76936	6.95438	6.86986	6.80758	6.9145
ILMN_1656382	7.75082	7.37027	7.67844	7.71139	7.52666	7.04793	7.47002	7.26357	7.44914	7.07224	7.95937	8.28998	7.48642	8.33257	7.49561	7.57081	7.92806	7.83826	8.00199	7.34914	7.93763	7.18991
ILMN_1656383	7.09753	7.0168	7.10231	7.04793	7.07099	6.99048	7.12163	7.08192	7.09674	7.06122	6.6424	6.68568	6.68745	6.69518	6.5305	6.6722	6.65304	6.67799	6.61112	6.64495	6.662	6.72092
ILMN_1656386	7.36582	7.43463	7.27849	7.45378	7.45273	7.37879	7.2135	7.18634	7.29221	7.43212	6.69394	6.78358	6.77063	6.89245	6.92509	7.19951	6.76797	6.79255	6.83475	6.58649	6.77178	6.78264
ILMN_1656393	7.1446	7.19579	7.13008	7.15098	7.09529	7.1804	7.09031	7.05986	7.13872	7.17141	6.68765	6.64144	6.72222	6.66089	6.65132	6.72212	6.73716	6.65809	6.7324	6.75286	6.68044	6.61231
ILMN_1656395	7.06249	7.0762	7.08192	7.08192	7.08876	7.1289	7.2135	7.30054	7.12163	7.14066	6.73501	6.65137	6.83736	6.77895	6.70043	6.68765	6.64923	6.78158	6.77305	6.83767	6.80758	6.7416
ILMN_1656399	7.87218	7.8546	7.80604	7.80063	7.85624	7.80019	7.74278	8.02157	7.70581	7.75293	7.5152	7.55793	7.64001	7.57721	7.5856	7.26948	7.42047	7.73639	7.46296	7.65615	7.55099	7.62608
ILMN_1656401	7.08068	7.11444	7.05129	7.15098	7.19138	7.07347	7.16257	7.15174	7.11366	7.15232	6.73501	6.82714	6.79778	6.79778	6.68496	6.88	6.95224	6.97754	6.85163	6.70365	6.95299	6.95486
ILMN_1656402	6.99878	7.22762	7.11222	7.04793	7.03737	7.08253	7.05986	7.03675	7.06122	7.15232	6.63619	6.68735	6.67595	6.69895	6.59575	6.61611	6.58705	6.60308	6.60386	6.64902	6.5892	6.72605
ILMN_1656404	7.20528	7.16965	7.16498	7.18215	7.17642	7.1804	7.09031	7.34183	7.1975	7.05001	6.93425	6.94765	6.93631	6.97826	7.03413	7.11317	7.05454	6.95708	6.7388	6.95529	6.86166	6.89505
ILMN_1656407	7.1382	7.09467	7.10231	7.05656	7.1446	7.27801	7.15232	7.02528	7.11366	7.17141	6.76308	6.70376	6.72111	6.62733	6.78168	6.71925	6.77675	6.62366	6.64305	6.8412	6.70232	6.73836
ILMN_1656409	7.1042	7.1042	7.09154	7.01434	7.12074	7.10291	7.07018	7.18634	7.07099	7.17141	6.71824	6.7429	6.80407	6.64519	6.70821	6.62507	6.81772	6.82447	6.69405	6.80625	6.72191	6.69564
ILMN_1656410	7.1042	7.06611	7.14838	7.22527	7.1289	7.15344	7.20347	7.17383	7.21794	7.06122	6.69886	6.70852	6.86759	6.65683	6.73401	6.6861	6.7608	6.69576	6.85163	6.77188	6.71254	6.7196
ILMN_1656413	9.66035	9.59924	9.25123	9.43352	9.27606	8.07697	9.19809	8.24643	9.63497	8.52074	8.74491	8.68343	8.86891	8.61179	8.0559	7.9096	8.62376	7.95136	8.24604	8.88557	8.55466	7.93781
ILMN_1656415	7.41076	7.54619	7.42723	7.49672	7.40157	7.33726	7.36704	7.63507	7.23522	7.36005	7.14112	6.90192	7.11968	7.21978	7.21492	6.81967	7.09172	7.17636	7.11507	6.95975	6.99159	7.2196
ILMN_1656419	7.30676	7.03737	7.01218	7.11291	7.1042	7.10291	7.18215	7.05986	7.02617	7.03871	6.91006	6.73706	6.71173	6.78705	6.82846	6.74419	6.72375	6.79747	6.72616	6.7122	6.67731	6.79694
ILMN_1656420	7.1446	7.19579	7.13008	7.1289	7.09529	7.44053	7.09031	7.1289	7.16965	7.15232	6.60285	6.75248	6.76669	6.70243	6.71991	6.7616	6.79995	7.00466	6.93351	6.72965	6.77778	6.76637
ILMN_1656421	7.11366	7.12436	7.18215	7.11291	7.06249	7.07347	7.02736	7.1382	7.1042	7.10291	6.8116	6.98673	6.85024	6.70783	6.78691	6.67606	6.82447	6.58805	6.66089	6.76468	6.86166	6.58938
ILMN_1656422	7.17383	7.1042	7.03236	7.13476	7.1042	7.1289	7.14254	7.05986	7.14512	7.09154	6.6679	6.76797	6.75088	6.78128	6.75142	6.75463	6.73479	6.62664	6.69529	6.76955	6.65926	6.537
ILMN_1656424	7.09031	7.21986	7.05129	7.08956	7.09529	7.08253	7.15232	7.1289	7.23522	7.14066	6.77188	6.83667	6.7416	6.59746	6.67697	6.66341	6.65304	6.72474	6.72892	6.69024	6.78841	6.82592
ILMN_1656427	7.53298	7.74608	7.69636	7.68728	7.53045	7.49934	7.64972	7.38115	7.58741	7.39106	7.23132	7.38702	7.19959	7.27081	6.92792	6.9692	7.0452	6.80377	6.94816	7.13118	7.06978	7.1643
ILMN_1656429	7.06249	7.1042	7.13989	7.12074	7.06249	7.15344	7.10231	7.03675	7.12163	7.25947	6.74647	6.80025	6.66819	6.8116	6.66303	6.63855	6.6642	6.5907	6.6818	6.65028	6.80313	6.77992
ILMN_1656434	7.1042	7.0857	7.05129	7.15431	7.09529	7.07347	7.00642	7.02528	7.02617	6.99878	6.86954	6.67731	6.7429	6.79005	6.70566	6.83988	6.79279	6.96911	6.76669	6.86553	6.78545	6.9709
ILMN_1656436	7.08068	7.06611	7.13989	7.14254	7.09529	7.13759	7.11291	7.1289	7.03531	7.15232	6.69886	6.81726	6.66145	6.70243	6.7883	6.68765	6.75972	6.83462	6.66662	6.73814	6.7385	6.75238
ILMN_1656448	7.09753	6.98544	7.02231	7.08192	7.06249	7.1804	7.03737	7.02528	6.99798	7.12163	6.67138	6.57905	6.71173	6.6129	6.80407	6.65385	6.64401	6.68529	6.64154	6.56527	6.70931	6.71793
ILMN_1656452	7.12163	7.05656	7.13008	7.06474	7.08876	7.00197	7.07018	7.03675	7.06122	7.05001	6.70355	6.70852	6.74892	6.82661	6.85154	6.6861	6.70222	6.80502	6.63538	6.75142	6.78986	6.75238
ILMN_1656463	7.32482	7.09467	7.24582	7.19579	7.1382	7.1446	7.03737	7.1382	7.06122	7.09154	6.77546	6.81147	6.69261	6.87232	6.77675	6.72902	6.668	6.64993	6.73371	6.77072	6.67731	6.67387
ILMN_1656472	7.04582	7.18835	7.06249	7.1289	7.02736	7.0109	7.03737	7.02528	6.95782	7.18215	6.75414	6.82051	6.67481	6.65166	6.68071	6.69158	6.75624	6.80625	6.57614	6.78841	6.66375	6.69394
ILMN_1656477	7.54267	7.81306	8.03871	7.77984	7.92851	8.72144	7.62582	8.01168	7.60704	8.22075	7.7223	7.60623	7.69789	7.71248	7.2213	8.29975	7.57933	7.82038	7.8144	7.90971	7.44689	8.1371
ILMN_1656482	7.74023	7.73832	7.69031	7.70903	7.44598	7.57945	7.60533	7.28257	7.68518	7.42033	7.26371	7.38702	7.26874	7.13385	6.87846	6.87693	7.16058	6.91885	7.12749	7.04862	6.78705	7.10213
ILMN_1656486	7.21211	7.13293	7.08192	7.22998	7.11291	7.23667	7.17273	7.16257	7.1042	7.13061	6.74892	6.8332	6.72004	6.73911	6.72892	6.75624	6.66063	6.72857	6.69405	6.74776	6.7324	6.73371
ILMN_1656487	7.49771	7.39893	7.43463	7.43463	7.47277	7.55936	7.33868	7.71314	7.42314	7.61661	7.21388	7.27007	7.37669	7.33743	7.58071	7.66234	7.30413	7.60793	7.46743	7.44021	7.52961	7.60087
ILMN_1656492	7.02736	7.03737	7.05129	7.07224	7.12074	7.07347	7.05986	7.16257	7.1042	7.14066	6.65799	6.6479	6.68745	6.94377	6.58139	6.67062	6.8117	6.69809	6.65936	6.63772	6.76105	6.61231
ILMN_1656495	7.09753	7.17898	7.11222	7.18952	7.12074	7.05656	7.09031	7.30054	7.04526	7.22527	6.83969	7.10921	6.7583	6.81702	6.73401	6.76298	6.81516	6.71439	6.75048	6.77895	6.89853	6.79246
ILMN_1656496	7.21211	7.15232	7.14838	7.1042	7.19888	7.1804	6.98337	7.08192	7.14512	7.14066	6.79871	7.08684	6.76308	6.9175	6.89585	6.83017	6.94601	6.88586	6.85273	7.04103	6.93582	6.78128
ILMN_1656501	7.8546	7.91082	8.15567	7.80367	8.49373	8.69812	8.40916	8.75052	8.38849	9.38189	7.89629	8.15231	8.67628	7.5622	8.38218	8.55081	9.1662	8.43351	8.68058	8.43484	8.23366	8.87148
ILMN_1656502	7.05493	7.11444	7.11222	7.00726	7.00822	7.1446	7.11291	7.05986	7.05266	7.08192	6.81795	6.79871	6.73521	6.69618	6.60275	6.63984	6.83857	6.72978	6.68869	6.71606	6.76837	6.83655
ILMN_1656504	7.18215	7.04731	7.16498	7.11291	7.03737	7.1804	7.24685	7.04731	7.16184	7.22527	6.8949	6.9889	6.81835	6.87044	6.75142	7.19409	6.72978	6.77305	6.86376	6.86286	6.90701	6.80975
ILMN_1656509	7.18215	7.16965	7.13008	7.1042	7.19138	7.08253	7.34697	7.04731	7.13872	7.19299	6.81697	6.80313	6.76945	6.75048	6.89334	6.61051	6.95529	6.70066	6.7401	6.75142	6.80614	6.73685
ILMN_1656521	7.35492	7.37666	7.24582	7.30728	7.26903	7.11955	7.46331	7.15174	7.25796	7.12163	7.23524	7.29212	6.86079	7.43731	7.24154	7.38334	7.04623	6.92792	7.1478	6.95346	7.0124	7.00106
ILMN_1656525	7.1042	7.06611	7.07224	7.14254	7.15344	7.11955	7.08068	7.08192	7.09674	7.11291	6.85481	7.19196	6.73142	6.78021	6.80086	6.79712	6.82447	6.75925	6.65799	6.88009	6.81891	6.85024
ILMN_1656527	7.18215	7.12436	7.22762	7.14254	7.1289	7.09276	7.12163	7.1042	7.08956	7.08192	6.81795	6.80025	6.77178	6.66946	6.70043	6.79121	6.65936	6.7311	6.8127	6.75414	6.72191	6.67731
ILMN_1656530	7.20005	7.32015	7.20062	7.32783	7.27701	7.37879	7.43654	7.22877	7.21794	7.25947	6.96103	6.89199	6.89875	6.82661	7.02317	7.00938	6.89033	6.88586	6.93151	6.83667	6.90824	7.14523
ILMN_1656534	7.02736	7.17898	7.13989	7.14254	7.00822	7.10291	6.99577	7.17383	6.9704	6.99878	6.70454	6.66926	6.80304	6.62859	6.76797	6.66341	6.71925	6.66522	6.72485	6.69158	6.69271	6.69886
ILMN_1656537	8.2816	8.16986	8.48817	8.35149	8.06174	7.98476	7.971	8.43588	8.05424	8.22688	8.49243	8.26701	8.00161	8.37881	7.97923	7.87526	8.14142	8.25001	8.21212	8.25382	7.72197	7.86971
ILMN_1656540	7.27602	7.41207	7.56481	7.44967	7.41838	7.1446	7.46331	7.22877	7.36582	7.22527	7.35893	7.37957	7.16002	7.22595	6.89585	6.91006	7.31808	6.96506	7.44798	7.21609	7.2991	6.92498
ILMN_1656545	7.11366	7.12436	7.15746	7.06474	7.11291	7.11955	7.05986	7.02528	7.1042	6.99878	6.80086	6.71352	6.88401	6.78474	6.7324	6.8567	6.831	6.68664	6.71133	6.78483	6.74301	6.84708
ILMN_1656546	7.08068	7.1042	7.17383	7.16257	7.1042	7.1289	7.15232	7.05986	7.18215	7.09154	6.7196	6.66594	6.81589	6.79778	6.73802	6.77602	6.7311	6.70566	6.92813	6.72965	6.83605	6.83189
ILMN_1656553	7.17383	7.05656	7.22762	7.06474	7.12074	7.18952	7.13061	7.24582	7.13008	7.19299	6.9177	6.93482	6.82977	6.78358	6.78168	6.89042	6.78362	6.80625	6.94557	6.7553	6.8116	6.75712
ILMN_1656554	7.1042	7.13293	7.04304	7.11291	7.07099	7.07347	7.22527	7.2135	7.09674	7.2042	6.54267	6.64144	6.42197	6.62497	6.56822	6.58515	6.50458	6.63046	6.65142	6.63511	6.61775	6.65004
ILMN_1656557	7.18215	7.16965	7.13008	7.1042	7.1289	7.1289	7.16257	7.24582	7.07099	7.14066	6.93771	6.73096	6.82977	6.801	6.75904	6.78032	6.85353	6.88974	6.82548	6.85493	6.76415	7.11744
ILMN_1656560	7.03737	7.30728	7.18215	7.08956	7.1446	7.13759	7.10231	7.08192	7.1975	7.14066	6.94911	6.82998	6.78861	6.89662	6.77675	6.88	6.80935	6.6826	6.92167	6.75414	6.76552	6.83189
ILMN_1656562	7.09031	7.12436	7.18215	7.038	7.07099	7.10291	7.12163	7.09337	7.13872	7.12163	6.61158	6.82407	6.64272	6.72978	6.73002	6.72343	6.63772	6.68529	6.61752	6.65418	6.5867	6.67731
ILMN_1656563	7.08068	7.0857	7.03236	7.038	7.1382	7.1446	7.15232	7.1382	7.18215	7.18215	6.77546	6.69241	6.67595	6.73371	6.71606	6.77315	6.7429	6.83058	6.81024	6.70089	6.67595	6.70365
ILMN_1656574	7.85879	7.66963	7.51248	7.81912	7.60403	7.1804	7.67297	7.22877	7.65855	7.42033	7.40272	7.14885	7.159	7.41538	6.93883	6.87859	7.24252	6.79995	7.14545	7.25715	7.09647	7.22647
ILMN_1656576	7.15292	7.15232	7.12074	7.09529	7.06249	7.10291	6.97138	7.15174	7.14512	7.02964	6.80758	6.87142	7.12685	6.85004	6.80923	6.76669	6.73605	6.67799	6.75259	6.76828	6.86777	6.83058
ILMN_1656577	7.06249	7.05656	7.10231	7.08192	7.01894	7.10291	7.02736	7.03675	7.00726	7.05001	6.88741	6.69241	6.74647	6.70783	7.07913	6.83017	6.72747	6.63689	6.63538	6.83988	6.66719	6.65166
ILMN_1656579	7.07224	7.15232	7.07224	7.09529	7.1042	7.27801	7.15232	7.09337	7.12163	7.18215	6.65799	6.64305	6.76945	6.69385	6.63281	6.62968	6.67957	6.59485	6.58259	6.78986	6.66375	6.59872
ILMN_1656589	7.18691	7.16125	7.19138	7.20171	7.15344	7.1804	7.16257	7.1382	7.24039	7.24861	6.79871	6.84357	6.79444	6.89528	6.85997	6.82098	6.86286	6.99887	6.72212	6.83017	6.79588	6.95299
ILMN_1656593	7.1382	7.11444	7.18215	7.07224	7.16125	7.09276	7.10231	7.18634	7.17642	7.14066	6.69271	6.76797	6.7165	6.71396	6.72616	6.7587	6.89943	6.7324	6.67887	6.67523	6.7324	6.75553
ILMN_1656595	7.35492	7.24861	7.19138	7.2574	7.40638	7.33726	7.27902	7.22877	7.22364	7.28643	7.38011	7.12952	7.12528	7.11224	7.06029	7.39663	7.37179	7.23613	7.36134	7.27791	7.63754	7.15678
ILMN_1656600	6.99048	7.03737	6.9406	7.08956	7.06249	7.08253	7.11291	7.04731	7.03531	7.12163	6.67138	6.68735	6.64272	6.81068	6.65132	6.68226	6.61678	6.68044	6.84071	6.70089	6.75958	6.60873
ILMN_1656604	7.03737	7.0762	7.00141	7.00726	7.02736	7.01894	7.03737	7.03675	7.06122	7.05001	6.59575	6.62329	6.52739	6.68012	6.65132	6.64401	6.52726	6.60759	6.52674	6.68166	6.53517	6.70689
ILMN_1656615	7.06249	7.0857	7.13008	7.11291	7.22706	7.11955	7.14254	7.09337	7.05266	7.09154	6.70355	6.59662	6.73802	6.67617	6.71741	6.88442	6.63656	6.65936	6.59468	6.63511	6.84189	6.6889
ILMN_1656617	7.03737	7.15232	7.10231	7.2135	7.16965	7.17141	7.13061	7.50255	7.09674	7.09154	6.81058	6.74605	6.69596	6.88424	6.9638	6.82744	6.94714	6.78996	6.83839	6.82915	6.75669	6.9026
ILMN_1656619	7.13008	7.1042	7.06249	7.17642	7.02736	7.09276	7.14254	7.16257	7.06122	7.12163	6.69024	6.7651	6.72474	6.72364	6.68496	6.58951	6.67721	6.64473	6.65004	6.66742	6.72343	6.80559
ILMN_1656621	8.33339	8.09964	8.3528	8.49476	8.27711	8.14885	7.88009	8.81694	8.22413	8.23125	8.58625	9.18448	8.83247	8.51982	8.4561	9.06223	8.9366	8.63177	8.80576	8.6073	8.8565	8.3085
ILMN_1656624	7.09031	7.05656	7.02231	7.05656	7.02736	7.1804	7.04793	7.05986	7.07988	7.05001	6.63376	6.68059	6.61667	6.62107	6.81676	6.56979	6.59662	6.67575	6.64005	6.65936	6.70931	6.69394
ILMN_1656625	11.8117	11.5523	11.7606	11.237	11.5639	11.4794	11.8156	11.6477	11.3807	11.3689	12.1507	12.3087	12.0379	11.5	12.3087	11.8673	12.1825	12.3588	11.8433	11.495	12.2882	11.5618
ILMN_1656628	7.92606	8.07727	8.03871	7.59793	8.04542	7.76095	8.09314	7.50255	8.03091	7.57447	7.52882	7.2134	7.36424	7.72031	7.01199	7.31718	7.8317	7.42599	7.56399	7.78991	7.50567	7.05354
ILMN_1656630	7.09031	7.16125	7.04304	7.1042	7.1042	7.09276	7.10231	7.15174	7.13872	7.19299	6.76212	6.75553	6.7497	6.77432	6.67312	6.72902	6.81407	6.64317	6.74388	6.65936	6.76837	6.78545
ILMN_1656635	7.15292	7.14313	7.2116	7.15431	7.12074	7.00197	7.15232	7.16257	7.14512	7.12163	6.84501	6.74021	6.74419	6.85997	6.70423	6.88312	6.81977	6.99581	6.82793	6.77305	6.82335	6.71295
ILMN_1656636	7.09031	7.20471	7.12074	7.14254	7.02736	7.00197	6.99577	7.09337	7.11366	7.10291	6.58503	6.6991	6.67989	6.67094	6.71075	6.76009	6.71925	6.65534	6.65004	6.67627	6.7913	6.71154
ILMN_1656637	7.1042	7.09467	7.04304	7.02373	7.09529	7.10291	7.08068	7.22877	7.06122	7.16257	6.61916	6.67251	6.67989	6.60285	6.67312	6.60142	6.67198	6.75414	6.83385	6.77305	6.71882	6.57147
ILMN_1656638	6.99878	7.13293	7.07224	7.04793	7.03737	7.09276	7.03737	7.02528	7.07099	7.08192	6.60034	6.61775	6.58938	6.52005	6.59444	6.53033	6.52856	6.58805	6.54234	6.63253	6.60142	6.5407
ILMN_1656647	7.06249	7.0857	7.08192	7.08192	7.04582	7.03737	7.07018	7.05986	6.98011	7.06122	6.61667	6.76797	6.76669	6.80758	6.79712	6.68071	6.70942	6.61752	6.7618	6.65281	6.70089	6.56441
ILMN_1656655	7.19385	7.11444	7.08192	7.09529	7.12074	7.07347	7.01743	7.11444	7.12163	7.07224	6.69158	6.78483	6.82416	6.70019	6.74647	6.84152	6.63656	6.7376	6.75925	6.67251	6.75669	6.74776
ILMN_1656656	8.19895	8.42682	8.21892	7.81531	8.50051	9.02497	8.62703	8.4416	8.49864	8.57781	8.50199	8.90957	9.00085	8.58435	8.62226	8.61984	9.10303	9.0575	8.69513	8.40885	8.95208	8.30465
ILMN_1656662	12.8631	12.9179	12.8962	12.9179	13.066	12.858	12.6822	12.8962	12.9013	13.1721	13.0099	12.3993	12.652	13.0147	12.9091	12.1861	12.712	12.6731	12.9224	13.3498	12.9043	12.9091
ILMN_1656670	7.57605	7.40422	7.51248	7.28583	7.71198	7.53843	7.54437	7.70055	7.39106	7.74654	7.06628	7.16014	6.993	7.02239	7.09773	7.18057	6.79529	7.16264	6.96571	7.13607	6.91618	7.51077
ILMN_1656672	6.99878	7.19579	7.04304	7.08956	7.04582	7.08253	7.05986	7.05986	7.03531	7.25947	6.73023	6.78806	6.67989	6.53005	6.61051	6.6861	6.55368	6.64753	6.72353	6.61536	6.68206	6.70043
ILMN_1656676	9.67386	9.14254	9.59527	9.64552	9.56039	8.85973	9.67746	9.07939	9.81822	9.28706	9.29973	8.91551	8.81203	9.04458	8.83814	8.04116	8.67716	8.93204	8.72354	9.35543	8.49191	8.92844
ILMN_1656678	7.1446	7.13293	6.99048	7.15098	7.1042	7.17141	7.17273	7.1289	7.13872	7.09154	6.6642	6.88371	6.70222	6.73685	6.78691	6.96279	6.67721	6.64753	6.78756	6.73346	6.6979	6.69564
ILMN_1656682	10.0077	9.78429	9.94956	10.0431	10.0536	9.84094	10.1001	10.1586	10.1892	10.6991	9.38029	9.44735	9.46375	8.92506	10.1825	9.14925	9.44877	10.011	9.78425	9.58483	9.41628	10.0557
ILMN_1656684	6.99048	7.2135	7.01218	7.1042	7.06249	7.02807	7.11291	7.15174	7.09674	7.07224	6.74419	6.86296	6.68238	6.76053	6.96511	6.70566	6.81058	6.75414	6.68024	6.67251	6.77915	7.1099
ILMN_1656691	7.47899	7.47658	7.42033	7.37666	7.34697	7.07347	7.43654	7.09337	7.48756	7.12163	7.2377	7.06018	6.93303	7.4266	6.81937	6.94805	7.11408	6.75925	6.98087	7.05206	6.89853	6.83058
ILMN_1656698	7.03737	7.05656	7.03236	7.11291	7.02736	7.13759	7.03737	7.08192	7.02617	6.98847	6.64113	6.56984	6.52739	6.47524	6.59575	6.6722	6.64923	6.54794	6.63259	6.60331	6.66063	6.83058
ILMN_1656706	7.15292	7.14313	7.13008	7.05656	7.12074	7.11955	7.08068	7.1042	7.12163	7.02964	6.6889	6.7416	6.67989	6.69518	7.05893	6.71376	6.74548	6.69328	6.79747	6.79871	6.56408	6.67731
ILMN_1656713	7.03737	6.99577	7.07224	7.05656	7.1042	7.04793	7.14254	7.08192	7.11366	7.07224	6.76094	6.56984	6.68745	6.77432	6.64827	6.83017	6.67832	6.84612	6.61871	6.81147	6.82947	6.76448
ILMN_1656715	7.11366	7.14313	7.08192	7.17642	7.04582	7.07347	7.18215	7.17383	7.09674	7.13061	6.68664	6.68059	6.77063	6.74776	6.78168	6.69843	6.74647	6.75295	6.79111	6.68529	6.7416	6.72902
ILMN_1656718	7.78536	7.46027	7.67244	7.74746	7.96857	8.33124	8.18635	8.48249	7.71656	8.26759	7.98429	7.89253	7.81776	7.79944	8.1791	7.98135	7.8317	8.45396	8.06962	8.21433	7.88103	8.77885
ILMN_1656720	7.05493	7.0762	7.14838	7.13476	7.04582	7.05656	7.18215	7.1289	7.12163	7.15232	6.64455	6.73555	6.66819	6.64519	6.86966	6.76298	6.72375	6.63807	6.64154	6.81805	6.65397	6.52626
ILMN_1656722	7.03737	7.04731	7.10231	7.06474	7.08876	7.08253	7.16257	7.1042	7.1042	7.08192	6.7553	6.73371	6.68113	6.61809	6.6862	6.77315	6.66572	6.72092	6.62002	6.74063	6.67387	6.59266
ILMN_1656724	7.12163	7.06611	7.08192	7.00726	7.1042	7.03737	7.08068	7.03675	7.11366	7.06122	6.91683	6.70852	6.72474	6.82098	6.75286	6.7208	6.82225	6.78555	6.82793	6.87794	6.68848	6.73226
ILMN_1656732	7.1446	7.12436	7.13989	7.06474	7.1382	7.07347	7.13061	7.16257	7.09674	7.07224	6.80655	6.64305	6.88312	6.63469	6.6979	6.85125	6.79995	6.72857	6.76925	6.62564	6.68206	6.83969
ILMN_1656743	7.11366	7.06611	7.13989	7.038	7.11291	7.08253	7.10231	7.04731	7.01607	7.12163	6.65534	6.73706	6.63645	6.57491	6.82321	6.70699	6.71793	6.70942	6.68735	6.72222	6.63689	6.55233
ILMN_1656744	7.1042	7.05656	7.07224	7.19579	7.06249	7.05656	7.15232	7.15174	7.03531	7.06122	6.69631	6.65137	6.57625	6.7324	6.75904	6.7039	6.60386	6.75787	6.72045	6.67627	6.54744	6.69564
ILMN_1656746	7.07224	7.11444	6.969	7.02373	7.15344	7.09276	7.16257	7.08192	7.07099	7.18215	6.72781	6.60438	6.6862	6.7416	6.66572	6.80407	6.70821	6.73371	6.65936	6.73814	6.64178	6.78986
ILMN_1656761	7.15292	7.12436	7.13008	7.12074	7.12074	7.02807	7.14254	7.15174	7.13872	7.14066	6.71154	6.73371	6.84612	6.74776	6.69014	6.67924	6.89662	6.66099	6.76435	6.8946	6.78221	6.75402
ILMN_1656767	7.07224	7.16965	7.03236	7.06474	7.06249	7.19888	7.08068	7.1382	7.07988	7.16257	6.69518	6.62329	6.71065	6.73802	6.73401	6.6861	6.62979	6.7197	6.71519	6.71086	6.78986	6.70832
ILMN_1656772	7.05493	7.1042	7.09154	7.1289	7.08876	7.0109	7.03737	7.05986	7.17642	7.03871	6.73371	6.78806	6.84496	6.80655	6.71873	6.66488	6.7859	6.78806	6.64005	6.70222	6.86777	6.64495
ILMN_1656779	6.96086	7.16965	7.07224	7.08956	7.15344	7.00197	7.05986	7.09337	7.12163	6.99878	6.7196	6.6642	6.72111	6.69751	6.78966	6.72212	6.71672	6.72353	6.58561	6.72846	6.67877	6.72762
ILMN_1656791	13.689	13.9891	13.813	13.9078	13.7115	13.813	13.8626	13.8208	13.8931	13.8393	13.7802	13.2837	13.4607	13.667	13.586	13.2275	13.4849	13.4849	13.7026	13.3142	13.5136	13.4849
ILMN_1656792	7.18215	7.22762	7.18215	7.16965	7.15344	7.37879	7.24685	7.24582	7.2294	7.11291	6.88132	6.88559	7.02394	6.98254	6.86731	7.05438	6.99384	6.82447	6.93351	6.92679	6.89547	6.9709
ILMN_1656798	7.12163	7.13293	7.01218	7.16965	7.08068	7.20684	7.13061	7.1289	7.1042	7.07224	6.67731	6.59325	6.80304	6.86808	6.7883	6.77188	6.86376	6.85592	6.73123	6.79215	6.90421	6.9709
ILMN_1656801	7.04582	7.16125	7.04304	7.15098	7.1289	7.1289	7.11291	7.04731	7.00726	7.12163	6.67595	6.72474	6.79881	6.77315	6.76009	6.79712	6.8438	6.76936	6.78264	6.82491	6.69271	6.62886
ILMN_1656802	7.06249	7.03737	7.13008	7.02373	7.03737	7.06474	7.00642	7.03675	7.1042	7.09154	6.56995	6.6565	6.62647	6.66341	6.80086	6.50015	6.47952	6.67924	6.63538	6.62968	6.7416	6.54697
ILMN_1656807	13.6458	13.8986	13.7521	13.8466	14.1864	13.7185	13.8931	13.6804	13.9492	13.9959	13.5038	13.5136	13.6863	13.6583	13.8555	13.4191	13.8555	13.7269	13.8883	13.8193	13.5515	13.6583
ILMN_1656812	7.12163	7.13293	7.16498	7.00726	7.12074	7.09276	7.03737	7.03675	7.08956	7.02964	6.82947	6.79726	6.71295	6.8116	6.63598	6.64272	6.65936	6.5867	6.7388	6.62968	6.78545	6.65672
ILMN_1656817	7.1042	7.04731	7.10231	6.98912	7.02736	7.22762	7.02736	7.07099	7.12163	7.06122	6.71054	6.79266	6.95124	6.72364	6.71606	6.64144	6.62101	6.62143	6.64305	6.7616	6.64519	6.74919
ILMN_1656818	7.24039	7.20471	7.17383	7.31076	7.18215	7.15344	7.18215	7.16257	7.2042	7.17141	6.85868	6.88559	6.77063	6.86203	6.67072	6.73491	6.82225	6.7324	6.86936	6.81712	6.82335	6.69564
ILMN_1656822	8.03847	8.66181	8.69691	8.53721	8.66561	9.52064	8.59011	8.39361	8.4416	8.82259	8.97373	8.84686	9.23093	9.28124	9.14764	8.8961	8.37437	8.66829	8.73078	9.09896	8.63568	9.72019
ILMN_1656826	7.21211	7.22762	7.26903	7.16965	7.19888	7.10291	7.17273	7.1382	7.22364	7.2135	6.68418	6.78806	6.72605	6.62107	6.81435	6.89343	6.82977	6.76669	6.8418	6.7859	6.64701	6.74605
ILMN_1656837	7.09753	7.13293	7.16498	7.1042	7.1382	7.09276	7.11291	7.16257	7.01607	7.14066	6.76542	7.10166	6.6862	6.71154	6.74776	6.86713	6.80559	6.82335	6.78264	6.72485	6.67062	6.75553
ILMN_1656840	7.20005	7.34235	7.18215	7.2193	7.33662	7.07347	7.31823	7.1289	7.31961	7.08192	7.03293	6.92879	7.02938	7.07759	6.8526	6.72762	6.92282	6.82592	6.85812	6.8412	6.75806	6.61051
ILMN_1656842	7.06249	7.09467	7.00141	7.08192	7.08876	7.06474	7.12163	7.01218	7.07988	7.05001	6.59915	6.74441	6.77546	6.6889	6.71352	6.57456	6.54994	6.55201	6.61005	6.65534	6.64356	6.65672
ILMN_1656846	7.1042	7.06611	7.00141	7.05656	7.08876	7.17141	7.16257	7.16257	7.16965	6.99878	6.56737	6.6889	6.66819	6.79569	6.6979	6.59105	6.72045	6.71813	6.75414	6.73966	6.82335	6.69564
ILMN_1656847	7.09031	7.09467	7.06249	7.03095	7.1042	7.11955	7.03737	7.1042	7.15344	6.98847	6.79664	6.75414	6.78861	6.71772	6.72111	6.7208	6.71793	6.72715	6.81511	6.68765	6.5907	6.68059
ILMN_1656849	7.09031	7.0168	7.20062	7.19579	7.1446	7.02807	7.08068	7.08192	7.09674	7.08192	6.7324	6.62822	6.74892	6.69024	6.7844	6.78032	6.7512	6.71559	6.77305	6.81601	6.8554	6.89671
ILMN_1656853	7.09031	7.12436	7.05129	7.15431	7.00077	7.09276	7.07018	7.08192	7.02617	7.03871	6.65936	6.87518	6.78986	6.66477	6.71489	6.72902	6.73836	6.63936	6.65142	6.76828	6.75806	6.95486
ILMN_1656863	7.11366	7.24861	7.13989	7.038	7.05493	7.10291	7.13061	7.08192	7.14512	6.98847	6.79329	6.59502	6.74031	6.67491	6.69663	6.78032	6.65418	6.59901	6.90755	6.69553	6.68361	6.7429
ILMN_1656865	7.03737	7.20471	7.07224	7.11291	6.98085	7.07347	7.02736	7.05986	7.00726	7.10291	6.70222	6.86966	6.57237	6.56083	6.71741	6.58029	6.64519	6.67799	6.63538	6.7071	6.7416	6.75402
ILMN_1656867	7.07224	7.03737	7.11222	7.19579	7.24582	7.0109	7.01743	7.15174	7.07988	7.08192	6.63129	6.76171	6.68879	6.81068	6.59444	6.69405	6.7619	6.7429	6.66522	6.67523	6.76253	6.72243
ILMN_1656868	9.70454	10.774	10.6089	10.2173	10.9515	11.666	11.5125	10.8127	11.5572	11.3706	11.3248	12.2086	12.273	11.2614	10.838	11.3369	11.4541	11.3042	11.0829	10.98	11.0268	11.1389
ILMN_1656869	7.28583	7.16125	7.38668	7.18952	7.36982	7.3087	7.30823	7.41931	7.25313	7.2135	7.37142	7.27551	7.19079	7.66562	7.76751	7.97052	6.92498	7.02813	7.34868	7.57516	6.79444	7.83333
ILMN_1656871	7.1042	7.11444	7.13008	7.1289	7.02736	7.11955	7.05986	7.08192	7.09674	7.08192	6.79215	6.70222	6.76807	6.64252	6.61992	6.72212	6.70454	6.65281	6.63876	6.77895	6.93303	6.68389
ILMN_1656879	7.16073	7.11444	7.20062	7.16257	7.1382	7.02807	7.09031	7.09337	7.05266	7.03871	6.69518	6.75414	6.73901	6.71991	6.70423	6.63689	6.689	6.77778	6.66385	6.71352	6.81589	6.67387
ILMN_1656882	6.99048	7.15232	7.03236	7.07224	7.01894	6.99048	7.13061	7.03675	7.00726	7.08192	6.60417	6.60609	6.67481	6.68238	6.668	6.5538	6.54994	6.56031	6.58561	6.58029	6.61611	6.67909
ILMN_1656883	7.05493	7.16965	7.12074	7.05656	7.00822	7.09276	7.08068	7.1042	7.13872	7.13061	6.7163	6.79404	6.68507	6.80655	6.75414	6.72616	6.67832	6.66522	6.67741	6.74063	6.75367	6.89343
ILMN_1656886	7.25313	7.28789	7.34555	7.26903	7.24582	7.15344	7.14254	7.02528	7.19024	7.09154	6.84945	6.88897	6.86505	7.08132	6.83969	6.86553	6.91908	6.86496	6.81511	6.879	6.86334	6.9566
ILMN_1656898	7.08068	7.0268	7.15746	7.18215	7.16965	7.05656	7.2135	7.11444	7.07988	7.25947	6.70019	6.58102	6.69385	6.67246	6.71075	6.72343	6.72167	6.70566	6.62647	6.81805	6.68529	6.95141
ILMN_1656900	9.12837	9.25268	9.11377	9.61394	9.77216	9.17636	9.71227	8.70006	8.93607	9.25016	10.4688	9.87618	9.72019	10.3504	9.19634	9.90873	10.8047	9.60584	10.3538	9.97399	10.2321	9.56267
ILMN_1656902	7.80367	7.95287	7.55105	7.70372	7.57069	7.70372	7.62582	7.51864	7.86862	7.58825	7.56042	7.76435	7.8483	7.44083	7.18665	7.79448	7.57807	7.72579	7.40272	7.09538	7.58287	7.12812
ILMN_1656904	7.16819	7.31409	7.39616	7.17642	7.20528	7.10291	7.24685	7.16257	7.24685	7.31076	6.9114	6.83988	6.85255	6.92679	6.78691	6.92007	6.90537	6.83058	6.91282	6.73346	6.69271	6.82264
ILMN_1656907	7.1042	7.09467	6.99048	7.1042	7.2193	7.1289	7.17273	7.02528	7.1042	7.10291	6.72092	6.8418	6.67595	6.66719	6.77315	6.72485	6.66326	6.76298	6.79871	6.69271	6.65534	6.74919
ILMN_1656909	7.03737	7.11444	7.07224	7.08192	7.04582	7.11955	7.04793	7.20005	7.1042	7.06122	6.62507	6.69036	6.75224	6.59325	6.60018	6.6147	6.63656	6.66915	6.62166	6.64178	6.57685	6.6307
ILMN_1656910	7.24039	7.15232	7.16498	7.26229	7.25082	7.2983	7.14254	7.1042	7.12163	7.31076	6.79444	7.02568	6.84612	6.84501	7.00466	6.89199	6.92374	6.9	6.77178	6.84401	6.79747	6.92333
ILMN_1656913	10.8753	11.149	10.8629	10.9607	10.9221	9.43716	11.0293	9.55903	10.7605	9.58719	10.5829	9.91631	10.1259	10.8562	8.63776	9.53331	10.3523	9.4478	10.068	10.6284	10.1502	8.84833
ILMN_1656915	7.1446	7.0857	7.16498	7.16257	7.1042	7.0109	7.11291	7.20005	7.17642	7.13061	6.77432	6.7651	6.78986	6.83689	6.69014	6.87859	6.8164	6.87823	6.6979	6.8523	6.79279	6.78128
ILMN_1656920	11.0301	11.8434	11.1988	10.9797	11.1562	11.9513	11.1266	12.0539	11.9467	11.5992	11.8673	12.3661	12.6356	11.7581	11.276	12.5709	11.9585	11.8962	12.273	12.1781	11.6179	11.8153
ILMN_1656921	7.07224	7.0168	7.04304	7.02373	7.08876	6.99048	7.02736	6.96454	7.09674	7.07224	6.59575	6.62647	6.51924	6.64795	6.48464	6.61206	6.69529	6.57095	6.56118	6.65672	6.68848	6.60083
ILMN_1656925	7.23522	7.17898	7.15746	7.28583	7.17642	7.24685	7.23522	7.32264	7.23522	7.40157	6.65936	6.63337	6.8574	6.8021	6.75658	6.91708	6.85661	6.83969	6.68579	6.73576	6.86166	6.73371
ILMN_1656927	7.09031	7.0857	7.10231	7.08192	7.1382	7.08253	7.07018	7.1042	7.11366	7.09154	6.71154	6.82225	6.7429	6.70642	6.71075	6.68765	6.71672	6.70699	6.6979	6.71086	6.79279	6.69231
ILMN_1656933	7.11366	7.17898	7.13008	6.98912	6.98085	7.16257	7.08068	7.05986	7.1042	7.09154	6.81384	6.67575	6.68238	6.65683	6.71873	6.68484	6.67957	6.75048	6.73501	6.73966	6.72191	6.62529
ILMN_1656934	7.71719	7.6021	7.68118	7.62302	7.69774	7.81017	7.52025	7.9419	7.67554	8.01805	7.54926	7.33275	7.42362	7.75138	7.33564	7.28635	7.5049	7.71937	7.53306	7.67977	7.40044	7.35152
ILMN_1656938	8.61382	8.959	9.05268	8.74599	8.69646	7.88009	8.68222	7.81197	8.67363	7.76823	8.96489	10.1454	9.80345	8.68987	7.7223	7.84956	9.14443	7.7955	8.66402	8.54008	8.59637	7.5159
ILMN_1656939	7.06249	7.12436	7.02231	7.08956	7.16125	7.07347	7.14254	7.1289	6.9704	7.12163	6.84301	6.94947	6.84824	6.79246	6.77432	6.7039	6.73479	6.94557	6.70577	6.95088	6.76253	6.6723
ILMN_1656940	7.1382	7.22762	7.12074	7.13476	7.1289	7.20684	7.16257	7.30054	7.21211	7.18215	7.04315	6.7429	6.81712	6.88424	7.04479	6.92973	6.98181	6.89643	6.86376	6.90402	6.81446	7.1329
ILMN_1656942	7.18215	7.21986	7.12074	7.16965	7.22706	7.05656	7.18215	7.1382	7.15344	7.16257	6.90076	6.7586	6.79664	6.97103	6.67805	6.8154	6.72485	6.8584	6.90076	6.89254	6.63198	6.78986
ILMN_1656949	7.1382	7.17898	7.14838	7.09529	7.1382	7.11222	7.12163	7.08192	7.13008	7.12163	6.72892	6.69405	6.74776	6.7416	6.69261	6.65672	6.61978	6.66385	6.65418	6.70365	6.71075	6.66558
ILMN_1656951	7.36582	7.44407	7.2116	7.42033	7.33662	7.3087	7.43654	7.32264	7.31961	7.17141	7.07466	6.97592	7.2152	7.04623	6.81795	6.78158	6.97659	6.89875	6.87133	6.92121	6.75059	6.85364
ILMN_1656955	7.12163	7.09467	7.2116	7.19579	7.17642	7.10291	7.13061	7.07099	7.16184	7.07224	6.67947	6.96322	6.8564	6.91282	6.70043	6.87859	6.70699	6.78294	6.74776	6.83331	6.67877	6.69394
ILMN_1656962	13.3251	13.288	13.4823	13.5994	13.6354	13.7425	13.4823	13.5706	13.2491	13.5911	13.6453	13.8245	13.8323	13.7872	13.7962	13.5721	13.8245	13.8493	13.8682	13.9074	13.6351	13.7962
ILMN_1656963	7.08068	7.03737	7.06249	7.04793	7.06249	7.13759	7.08068	7.09337	7.04526	7.08192	6.65534	6.72147	6.74528	6.68765	6.76009	6.7587	6.67957	6.69061	6.7324	6.68269	6.72631	6.87518
ILMN_1656977	7.86559	7.87518	7.89534	7.71139	7.67297	7.15344	7.74989	7.1042	7.74746	7.25947	7.69145	7.51553	7.56488	7.62972	6.87133	6.96112	7.47424	7.10749	7.08081	7.19254	7.33055	6.78545
ILMN_1656979	7.20528	7.17898	7.06249	7.15431	7.12074	7.04793	7.05986	7.11444	7.08956	7.06122	6.84501	6.6565	6.80407	6.75259	6.70423	6.72212	6.6642	6.69809	6.69923	6.80717	6.79747	6.69742
ILMN_1656981	7.18691	7.04731	7.18215	7.18215	7.11291	7.05656	7.07018	7.11444	7.2042	7.10291	6.7859	6.94061	6.74528	6.79778	6.74419	6.7479	6.73966	6.69923	6.6818	6.76242	6.98557	6.74419
ILMN_1656988	7.13008	7.13293	7.03236	7.11291	7.11291	7.03737	7.10231	7.08192	7.05266	7.08192	6.70832	6.6889	6.64668	6.58538	6.66008	6.70942	6.59325	6.83189	6.77178	6.7416	6.7703	6.63236
ILMN_1656992	7.13008	7.13293	7.13989	7.15098	7.17642	7.1446	7.13061	7.09337	7.14512	7.10291	6.82438	6.71661	6.81712	6.76171	6.74537	6.78986	6.85771	6.76936	6.64712	6.70586	6.75516	6.75553
ILMN_1656993	7.07224	7.16965	7.12074	7.12074	7.04582	7.1804	7.08068	7.11444	7.15344	7.15232	6.85144	6.80189	6.72605	6.59872	6.78566	6.72212	6.75752	6.56403	6.82548	6.75034	6.5907	6.71489
ILMN_1656998	7.09753	7.15232	7.04304	7.06474	7.07099	7.24685	7.14254	7.1289	7.03531	7.23584	6.64679	6.68735	6.73142	6.55766	6.5373	6.71925	6.80224	6.62664	6.73371	6.67251	6.68044	6.82885
ILMN_1657002	7.05493	7.17898	7.11222	7.12074	7.08068	7.06474	7.04793	7.05986	7.05266	7.06122	6.67491	6.71661	6.66819	6.68765	6.70821	6.81835	6.72616	6.75787	6.78756	6.67002	6.79279	6.7868
ILMN_1657009	7.09031	7.1042	7.17383	7.12074	7.08068	7.16257	7.20347	7.09337	7.12163	7.009	6.84945	6.6642	6.79881	6.7416	6.74647	6.8683	6.801	6.80879	6.77546	6.66089	6.75806	6.8156
ILMN_1657010	7.06249	7.0857	7.10231	7.16257	7.03737	7.15344	7.16257	7.09337	7.2042	7.12163	6.72892	6.6889	6.70345	6.55766	6.71741	6.7479	6.69886	6.73501	6.8021	6.72747	6.67595	6.79847
ILMN_1657011	7.40422	7.49467	7.36582	7.36582	7.68118	7.77875	7.74989	7.24582	7.75293	7.69607	7.13419	7.77029	7.40924	7.35245	7.34152	7.43743	7.60976	7.71063	7.39348	7.24424	7.47695	7.08326
ILMN_1657022	7.15292	7.04731	7.13008	7.09529	7.11291	7.33726	7.03737	7.16257	7.16965	7.15232	6.59444	6.80975	6.61536	6.70376	7.16692	6.90737	6.90421	7.13768	6.9648	6.80717	6.7416	7.05635
ILMN_1657033	7.1382	6.97359	7.14838	7.14254	7.01894	7.03737	7.17273	7.07099	7.05266	7.11291	6.6679	6.6642	6.69843	6.59872	6.82705	6.63689	6.689	6.64613	6.62952	6.66468	6.67731	6.72443
ILMN_1657039	7.13008	7.16125	7.19138	7.08956	7.16965	7.19888	7.17273	7.2135	7.14512	7.2135	6.89149	6.97107	6.76435	6.79569	6.83597	6.8487	6.95124	6.7949	6.81024	6.70586	6.69923	6.82592
ILMN_1657041	7.15292	7.13293	7.19138	7.2135	7.17642	7.26664	7.34697	7.16257	7.22364	7.19299	6.92007	6.75414	6.8408	6.79881	6.89199	6.88	6.76669	6.80502	6.93151	6.81712	7.04479	6.76308
ILMN_1657044	7.05493	7.0268	7.06249	7.03095	7.08876	7.07347	7.05986	7.18634	7.02617	7.13061	6.70089	6.64305	6.79111	6.63748	6.69014	6.61611	6.69158	6.84109	6.79601	6.58318	6.79444	6.56441
ILMN_1657045	7.20528	7.2135	7.12074	7.03095	7.07099	7.1289	7.09031	7.07099	7.09674	7.17141	6.70942	6.74021	6.7583	6.71276	6.9066	6.71925	6.82977	6.97432	6.91079	6.77895	6.78052	6.83189
ILMN_1657050	7.20005	7.16965	7.29482	7.11291	7.15344	7.23667	7.12163	7.1382	7.08956	7.15232	6.73501	6.7586	6.70577	6.78021	6.70043	6.84152	6.66063	6.67697	6.91282	6.83017	6.69014	6.67062
ILMN_1657056	7.19385	7.12436	7.15746	7.20684	7.25082	7.26664	7.24685	7.07099	7.2042	7.2042	6.61417	6.82051	6.87236	6.77652	6.83453	6.64807	6.7405	6.79255	6.82548	6.72616	6.92813	6.72443
ILMN_1657058	6.98085	7.03737	7.08192	7.04793	7.16125	7.09276	7.19299	7.18634	7.00726	7.06122	6.77865	6.79569	6.98575	6.70019	6.84501	6.72616	6.81874	6.69328	6.8946	6.84208	6.74301	6.75553
ILMN_1657064	7.66472	7.55936	7.71597	7.69905	7.71656	7.70372	7.78482	7.72582	7.78947	7.68728	7.31718	7.42443	7.72439	7.57033	6.9748	7.08662	7.51856	7.16264	7.11756	7.22606	7.25123	7.20871
ILMN_1657074	6.99048	7.0762	6.969	6.98085	7.09529	7.11955	7.09031	7.15174	7.07988	7.13061	6.70577	6.80502	6.73142	6.7416	6.62215	6.78294	6.6642	6.7429	6.6818	6.76242	6.79444	6.69394
ILMN_1657077	7.13008	7.09467	7.12074	7.08956	7.08876	7.22762	7.14254	7.02528	7.06122	7.17141	6.83475	6.81896	6.80014	6.78909	6.7883	7.08501	6.82089	6.99295	6.85054	6.82377	7.02423	6.89982
ILMN_1657079	7.09031	7.05656	7.00141	7.15431	7.01894	7.03737	7.00642	7.09337	7.02617	7.11291	6.64356	6.57905	6.61775	6.63469	6.65926	6.6861	6.70699	6.62143	6.61573	6.57749	6.69158	6.65004
ILMN_1657086	7.19385	7.22762	7.07224	7.08192	7.16125	7.13759	7.2135	7.1289	7.11366	7.15232	6.81058	6.79266	6.79227	6.82377	6.63598	6.82612	6.82651	6.73501	6.81147	6.76689	6.71882	6.76797
ILMN_1657087	7.11366	6.96454	6.98085	7.06474	6.98085	7.10291	7.03737	7.08192	7.07099	7.09154	6.62859	6.5223	6.5867	6.62989	6.58393	6.66636	6.62215	6.63936	6.61276	6.59915	6.79279	6.75553
ILMN_1657095	7.36582	7.43463	7.31536	7.34183	7.40157	7.65672	7.34697	7.09337	7.49222	7.58825	7.57695	7.87473	7.62129	7.48344	7.63679	7.68951	7.3882	7.59731	7.44015	7.50004	7.48977	7.84589
ILMN_1657096	7.04582	7.14313	7.05129	7.04793	7.00077	7.03737	7.09031	7.03675	7.05266	7.01894	6.62757	6.57201	6.5655	6.62733	6.55711	6.62507	6.613	6.63046	6.59468	6.56955	6.64701	6.66558
ILMN_1657111	6.96086	7.0762	6.99048	7.15431	7.08876	7.08253	7.05986	7.07099	7.02617	7.01894	6.61032	6.68059	6.69385	6.64252	6.58515	6.61051	6.57992	6.59639	6.66226	6.61775	6.54348	6.62356
ILMN_1657125	7.07224	7.0857	7.16498	7.20684	7.08068	7.05656	7.09031	7.1289	7.16184	7.11291	6.69886	6.75088	6.7583	6.57491	6.72233	6.71641	6.87282	6.74151	6.8021	6.73576	6.75669	6.77213
ILMN_1657128	7.04582	7.04731	7.14838	7.08192	7.11291	7.25796	7.09031	7.07099	7.09674	7.12163	6.80841	6.6094	6.80014	6.7687	6.85771	6.91158	6.90156	6.7844	6.7553	6.58029	6.69618	6.72443
ILMN_1657129	10.1119	9.59481	9.78969	10.2196	9.59527	7.7948	9.99726	8.2332	10.0166	8.27157	9.9694	9.60921	9.42216	10.5321	7.92769	8.08577	9.9718	8.46703	9.73212	10.2931	9.61139	8.40604
ILMN_1657139	7.73777	8.11906	7.99113	7.93628	7.73777	7.36061	7.75742	7.32264	7.8457	7.44053	7.73975	7.63503	7.71168	7.74475	7.19884	7.30562	7.68919	7.14175	7.59723	7.81145	7.45581	7.26382
ILMN_1657141	7.1382	7.12436	7.10231	7.12074	7.09529	7.07347	7.28789	7.05986	7.02617	7.14066	6.85481	6.82846	6.73032	6.76665	6.71991	6.79995	6.80935	6.62366	6.86376	6.67762	6.6269	6.84559
ILMN_1657144	7.19385	7.263	7.31536	7.28789	7.33662	7.4257	7.32783	7.22877	7.37666	7.34697	6.89023	6.81147	6.94667	7.0293	6.91847	6.8726	7.11129	7.05602	7.09422	7.1261	7.15412	6.89982
ILMN_1657145	7.22364	7.14313	6.98085	7.16257	7.20528	7.07347	7.15232	7.05986	7.2294	7.03871	6.7405	6.79726	6.79227	6.70509	6.8438	6.81128	6.75516	6.81712	6.71264	6.73576	6.70586	6.80975
ILMN_1657147	7.04582	7.0857	7.03236	7.09529	7.05493	6.99048	7.02736	7.08192	7.06122	7.009	6.69886	6.74776	6.71065	6.68519	6.53921	6.68226	6.69886	6.62664	6.69405	6.60884	6.66543	6.62356
ILMN_1657148	7.26357	7.13293	7.21794	7.20684	7.15344	7.18952	7.20347	7.2135	7.21794	7.10291	6.85144	6.63337	6.86996	6.74658	6.75658	6.83857	6.71427	6.70066	6.7324	6.72485	6.71559	6.78264
ILMN_1657149	7.1446	6.99577	7.05129	7.1289	7.05493	7.20684	7.10231	7.08192	7.13872	7.15232	6.65166	6.69241	6.71904	6.82098	6.70043	6.69271	6.57614	6.68166	6.77915	6.63511	6.68529	6.7429
ILMN_1657153	8.49373	7.98888	8.03871	8.30278	7.89736	7.60659	8.1118	7.72582	8.21376	7.69607	6.7324	6.58649	6.69484	6.73371	6.70942	6.77895	6.70454	6.79255	6.59167	6.61667	6.78052	6.70365
ILMN_1657157	7.20528	7.05656	7.07224	7.05656	7.08876	7.08253	7.11291	7.17383	7.13008	7.18215	6.72443	6.82407	6.80531	6.90402	6.78566	6.82098	6.81407	6.80879	6.72616	6.82815	6.87377	6.95486
ILMN_1657158	7.1382	7.21986	7.12074	7.16965	7.16965	7.09276	7.04793	7.2135	7.09674	7.13061	6.80313	6.67084	6.89199	6.73371	6.7416	6.77315	6.76552	6.69809	6.78609	6.66889	6.78841	6.87978
ILMN_1657163	7.12163	7.06611	7.13008	7.01434	7.1382	7.13759	7.05986	7.18634	7.03531	7.12163	6.73123	6.70078	6.70454	6.7687	6.7324	6.73371	6.66326	6.60896	6.52895	6.80831	6.77178	6.63236
ILMN_1657191	7.06249	7.0762	7.16498	7.15098	7.1382	6.96389	6.95924	7.09337	7.17642	7.10291	6.72092	6.84357	6.76807	6.79995	6.77188	6.70942	6.76552	6.77778	6.57439	6.75414	6.51478	7.1099
ILMN_1657194	7.11366	7.09467	7.14838	7.13476	7.04582	7.00197	7.05986	7.04731	7.05266	7.06122	6.82846	6.80025	6.77432	6.65556	6.86584	6.7429	6.76905	6.74528	6.83385	6.71741	6.82622	6.71489
ILMN_1657199	7.12163	7.0268	7.11222	7.12074	7.1289	7.11222	7.09031	7.15174	7.1042	7.13061	6.72212	6.81896	6.76669	6.77652	6.7616	6.79279	6.67595	6.69453	6.71133	6.73226	6.90824	6.64305
ILMN_1657204	10.3289	10.4546	10.4402	10.3094	10.4917	9.50921	10.2769	9.63693	10.7528	10.0049	10.0143	10.2727	10.1825	10.0486	9.7473	9.28124	10.1322	9.49619	9.91735	10.1357	10.1287	9.52715
ILMN_1657210	7.16819	7.16965	7.2116	7.13476	7.2135	7.11955	7.19299	7.17383	7.11366	7.37027	6.80086	6.68221	6.76807	6.70131	6.76426	6.78032	6.689	6.87823	6.70478	6.7859	6.64902	6.69742
ILMN_1657222	7.16819	7.16965	7.08192	7.1042	7.05493	7.17141	7.09031	7.11444	7.13872	7.02964	6.70832	6.94765	6.81107	6.70642	6.77072	6.66778	6.67062	6.70566	6.78032	6.83331	6.6979	6.81692
ILMN_1657230	7.11366	7.06611	7.13008	7.06474	7.02736	7.11222	7.12163	7.2135	7.12163	7.12163	6.79111	6.65936	6.66145	6.71044	6.76542	6.8288	6.67595	6.71186	6.79601	6.69821	6.70931	6.72902
ILMN_1657234	7.12163	7.14313	7.12074	7.19579	7.1289	7.10291	7.01743	7.09337	7.16965	7.13061	6.67491	6.79121	6.84824	6.74548	7.16898	6.78294	6.92926	6.80377	6.78149	6.70586	6.95299	6.92802
ILMN_1657235	7.02736	7.06611	7.01218	7.07224	7.00077	7.07347	7.01743	7.09337	6.99798	7.09154	6.71824	6.69405	6.511	6.60386	6.55711	6.5712	6.59575	6.69453	6.59915	6.64495	6.61276	6.57383
ILMN_1657237	7.67844	7.46519	7.59793	7.56481	7.59373	7.66983	7.52841	7.50255	7.53045	7.53982	7.38521	7.22068	7.2613	7.68872	7.29179	7.27264	7.22008	7.15877	7.38941	7.53478	7.61936	7.62932
ILMN_1657238	7.19385	7.16125	7.11222	7.1289	7.12074	7.10291	7.12163	7.16257	7.06122	7.16257	6.7252	6.75553	6.79227	6.78232	6.7616	6.83988	6.76435	6.75048	6.89971	6.78362	6.83221	6.70043
ILMN_1657247	7.12163	7.09467	7.08192	7.11291	7.02736	7.11222	7.13061	7.00141	7.1042	7.09154	6.51721	6.61112	6.61158	6.65458	6.70423	6.62356	6.75248	6.75925	6.70965	6.65142	6.65039	6.69231
ILMN_1657248	7.15292	7.0168	7.12074	7.08956	7.11291	7.1804	7.12163	7.02528	7.11366	7.10291	6.92813	6.98484	6.92273	6.84401	6.84923	6.8683	6.94043	6.7844	6.96788	6.82601	6.85074	7.02588
ILMN_1657249	7.00822	6.86294	7.05129	7.00726	7.01894	7.07347	6.92048	7.08192	7.16965	7.10291	6.61032	6.68059	6.66493	6.65039	6.64712	6.82357	6.80798	6.68937	6.65936	6.60199	6.84319	6.70965
ILMN_1657254	7.19385	7.13293	7.14838	7.14254	7.07099	7.03737	6.99577	7.16257	7.1042	7.07224	6.74528	6.7324	6.77296	6.77432	6.75142	6.73741	6.68206	7.01418	6.65672	6.65281	6.66719	6.72443
ILMN_1657266	7.09753	7.12436	7.19138	7.1289	7.1042	7.1446	7.11291	7.1382	7.16965	7.19299	6.7324	6.74919	6.66946	6.83475	6.80923	6.71925	6.57237	6.6049	6.7071	6.75414	6.70586	6.83189
ILMN_1657273	7.16819	7.1042	7.14838	7.13476	7.1382	7.11955	7.2135	7.15174	7.11366	7.22527	6.77082	6.70376	6.74419	6.82098	6.79246	6.60742	6.75516	6.72605	6.77178	6.69945	6.60742	6.69231
ILMN_1657274	7.1382	7.09467	7.05129	7.08956	7.1289	7.1446	7.10231	7.02528	7.1042	6.95626	6.77865	6.66926	6.79664	6.63876	6.7405	6.697	6.65799	6.71186	6.8268	6.73446	6.75958	6.67387
ILMN_1657278	7.21211	7.11444	7.13989	7.15431	7.20528	7.15344	7.12163	7.18634	7.11366	7.11291	6.96928	6.96121	6.92642	6.74419	6.82203	6.71086	6.72747	6.71559	6.81967	6.77664	6.89701	6.81987
ILMN_1657279	7.12163	7.13293	7.16498	7.08956	7.04582	7.1446	7.09031	6.98847	7.07099	7.16257	6.69271	6.89597	6.75967	6.71396	6.53554	6.63984	6.69158	6.82592	6.8021	6.81712	6.61775	6.69394
ILMN_1657283	11.6392	11.4359	11.3978	11.5605	11.4978	11.5113	11.585	11.6751	11.4748	11.6449	11.1041	11.5592	11.4647	10.8489	11.5955	11.4008	11.4033	11.6531	11.3448	11.3483	11.5207	11.1153
ILMN_1657285	7.02736	7.0857	7.20062	7.08956	7.01894	7.04793	7.04793	7.1289	6.98011	7.07224	7.00798	6.81896	6.73391	6.81795	6.86453	6.80717	6.7405	6.92017	6.64434	6.65142	6.73542	6.7883
ILMN_1657286	7.06249	7.04731	7.06249	7.11291	7.17642	7.20684	7.12163	7.11444	7.1975	7.13061	6.87627	6.59662	6.78158	6.65809	6.66936	6.75059	6.81058	6.81242	6.7376	6.74647	6.73696	6.77213
ILMN_1657288	7.36005	7.18835	7.36005	7.22998	7.26406	7.38597	7.22527	7.40157	7.34952	7.63752	7.01383	6.84645	6.9248	6.95529	6.94816	6.91559	7.00641	7.27551	7.13595	7.04561	6.89982	7.06155
ILMN_1657295	6.99048	7.0168	7.01218	7.038	6.95626	7.00197	7.11291	7.09337	7.05266	7.07224	6.75099	6.77129	6.62143	6.61158	6.58515	6.91436	6.78032	6.55201	6.65799	6.75142	6.72485	6.56955
ILMN_1657302	7.25313	7.2135	7.26903	7.29425	7.393	7.11955	7.30823	7.40157	7.3295	7.2135	7.02418	7.37007	7.24011	7.04165	6.83969	6.96279	7.11408	7.20117	7.46463	6.92594	7.31649	7.26937
ILMN_1657312	7.03737	7.05656	7.11222	7.1042	7.02736	7.10291	7.15232	7.04731	7.02617	7.03871	6.77938	6.75553	6.70454	6.63876	6.67575	6.82357	6.68454	6.67291	6.64434	6.6942	6.74021	6.61916
ILMN_1657316	7.1382	7.17898	7.12074	7.15098	7.08068	7.1289	7.16257	7.17383	7.11366	7.15232	6.7859	6.7776	6.69945	6.77432	6.80086	6.67924	6.74548	6.90566	6.69271	6.67523	6.71396	6.76797
ILMN_1657317	7.33616	7.32482	7.72349	7.58367	7.42913	7.88839	7.51248	8.12733	7.38668	7.98511	7.05606	7.12175	7.1261	6.93762	7.71099	7.81297	7.21232	7.86276	7.76072	7.75737	7.24916	7.61557
ILMN_1657332	7.1446	7.0762	7.2116	7.20684	7.16965	7.31961	7.13061	7.11444	7.03531	6.96826	7.13906	6.81589	6.90076	6.97522	7.17657	7.35916	6.79995	7.24215	6.91455	6.86286	6.81024	6.89982
ILMN_1657340	7.06249	7.13293	7.11222	7.09529	7.1382	7.1446	7.12163	7.09337	7.16965	7.01894	6.75752	6.82846	6.88808	6.86966	6.87693	6.80294	7.05845	6.93762	6.87518	6.85004	7.02248	6.83058
ILMN_1657344	7.1382	7.16965	7.11222	7.08956	7.1446	7.11222	7.09031	7.07099	7.13008	7.14066	6.66572	6.71352	6.84923	6.76298	6.95486	6.80975	6.62101	6.70066	6.66662	6.71489	6.69923	6.83189
ILMN_1657347	7.11366	7.19579	7.14838	7.1042	7.16965	7.15344	7.11291	7.04731	7.19024	7.14066	6.7265	6.87322	6.67084	6.77895	6.77072	6.8726	6.68341	6.84492	6.78756	6.71352	6.81305	6.70211
ILMN_1657348	7.48296	7.49934	7.61763	7.49672	7.63704	7.75293	7.88009	8.03823	7.67244	7.52381	7.28898	7.49542	7.50649	7.36336	7.26143	7.30642	7.57405	7.44578	7.38044	7.10147	7.32481	7.06018
ILMN_1657349	7.11366	7.0268	7.03236	7.1289	7.15344	7.05656	7.15232	7.1042	7.1042	7.08192	6.80313	6.80826	6.70222	6.59746	6.68071	6.79121	6.55506	6.69328	6.60539	6.60609	6.6722	6.65304
ILMN_1657358	7.08068	7.09467	7.06249	7.07224	7.11291	7.15344	7.08068	7.1382	7.07099	6.99878	6.55794	6.62979	6.76669	6.71044	6.82428	6.66341	6.72375	6.64063	6.73002	6.63511	6.64902	6.73836
ILMN_1657361	7.55105	7.58741	7.6047	7.67844	7.81017	7.88453	7.77136	7.84666	7.62181	7.61661	7.58074	7.61832	7.70721	7.3271	7.233	7.0695	7.31214	7.23979	7.28323	7.35772	7.23192	7.51383
ILMN_1657373	7.17383	7.16965	7.2116	7.08956	7.15344	7.19888	7.14254	7.04731	7.27602	7.12163	6.81908	6.85968	6.88498	6.9393	6.75286	6.67762	7.11029	6.85968	6.76053	6.82915	7.04009	6.83969
ILMN_1657374	7.1042	7.17898	7.09154	7.03095	7.09529	7.21794	7.17273	7.11444	7.09674	7.18215	6.63619	6.62329	6.71793	6.68238	6.7324	6.59385	6.662	6.68394	6.58089	6.67002	6.86166	6.73521
ILMN_1657378	7.09031	7.0762	7.13989	7.15431	7.08068	7.11955	7.07018	6.98847	7.08956	7.03871	6.84184	6.80655	6.73391	6.80428	6.65926	6.78986	6.76905	6.92017	6.71519	6.7429	6.65039	6.71295
ILMN_1657381	7.01743	6.98544	7.06249	6.95298	7.1382	7.1289	7.00642	7.1042	7.13008	7.08192	6.69271	6.75088	6.72702	6.65458	6.72762	6.76797	6.68702	6.70942	6.74528	6.78362	6.9114	6.62708
ILMN_1657395	9.20887	9.10556	8.64233	8.96672	8.78202	8.83008	8.74891	9.00968	9.16475	8.91434	8.88794	9.27979	9.21315	8.83861	8.34153	9.44033	9.31163	9.1262	8.96326	8.72128	8.7941	8.89328
ILMN_1657398	7.3295	7.22762	7.31536	7.33868	7.20528	7.1289	7.41889	7.09337	7.38115	7.48023	6.9409	6.65799	6.87458	6.98124	6.86731	6.90566	7.19584	6.90566	6.85592	6.98735	7.13902	6.93482
ILMN_1657399	7.03737	7.13293	7.12074	7.08192	7.18215	7.1446	7.13061	7.26357	7.13872	7.09154	6.65418	6.62143	6.76807	6.64658	6.63984	6.64401	6.75388	6.66226	6.61112	6.67762	6.80446	6.58151
ILMN_1657405	7.27602	7.29482	7.22762	7.2193	7.31897	7.25796	7.40157	7.1289	7.22364	7.28643	7.14346	6.88732	7.06731	7.05864	7.30106	6.95975	6.89577	6.73371	7.11408	7.03071	7.04169	7.15797
ILMN_1657406	7.22364	7.13293	7.2116	7.17642	7.16125	7.19888	7.19299	7.32264	7.36061	7.2135	6.74991	6.65281	6.83493	6.92822	6.69126	6.73204	6.75624	6.73371	6.86608	6.80517	6.70931	6.72605
ILMN_1657409	7.06249	7.09467	7.10231	7.00726	7.09529	7.09276	7.03737	7.02528	7.11366	7.07224	6.63376	6.60609	6.64413	6.65942	6.69014	6.6722	6.70821	6.62002	6.66926	6.60884	6.71254	6.68389
ILMN_1657421	7.1446	7.1042	7.08192	7.09529	7.11291	7.08253	7.05986	7.16257	7.18215	7.07224	6.73123	6.71186	6.6862	6.72616	6.86584	6.73052	6.67595	6.71308	6.65142	6.69553	6.71559	6.74605
ILMN_1657423	9.69137	9.01412	9.41903	9.58087	8.76764	8.56034	9.298	9.90558	9.46313	9.23877	9.62937	9.88674	9.10961	10.0101	9.98372	9.97738	9.94263	10.0486	10.1544	9.62732	10.2064	9.79997
ILMN_1657429	7.1042	7.06611	7.09154	7.11291	7.2193	7.08253	7.03737	7.04731	7.06122	7.07224	6.69394	6.74776	6.6862	6.70243	6.76298	6.83017	6.68341	7.03951	6.72892	6.78841	6.66719	7.00106
ILMN_1657435	7.05493	7.0857	7.04304	7.00726	7.11291	7.02807	7.04793	7.1042	7.05266	7.05001	6.71376	6.60083	6.7497	6.73371	6.85382	6.83453	6.58259	6.81138	6.88897	6.64495	6.86936	6.78986
ILMN_1657436	7.29482	7.21986	7.32319	7.393	7.37614	7.49467	7.35822	7.58035	7.31961	7.51409	6.77769	7.18828	6.60285	6.65166	6.8945	6.65084	6.8555	6.81958	6.87636	6.91196	6.91455	6.89848
ILMN_1657440	7.09031	7.03737	7.07224	7.07224	7.1446	7.17141	7.10231	7.20005	7.15344	7.10291	6.64923	6.80502	6.76308	6.78909	6.74537	6.76533	6.75248	6.63269	6.63399	6.78705	6.66375	6.71154
ILMN_1657442	7.09753	7.06611	7.14838	7.13476	7.16125	7.16257	7.03737	7.1042	7.16184	7.09154	6.59144	6.81726	6.65153	6.6889	6.79712	6.79847	6.69751	6.74905	6.65418	6.82815	6.84319	6.88858
ILMN_1657443	7.09753	7.1042	7.07224	7.17642	7.19888	7.11222	7.13061	7.07099	7.08956	7.13061	6.7429	6.72312	6.81237	6.66089	6.80655	6.66636	6.86588	6.90229	6.62497	6.62564	6.80879	6.70965
ILMN_1657446	8.04955	7.96718	8.19723	8.29679	8.03504	7.56629	7.9414	7.43836	7.72176	7.59793	7.85304	6.90402	7.3353	7.93331	7.5481	7.36386	7.44309	7.20271	7.57862	7.94047	7.7829	7.60222
ILMN_1657451	7.1446	7.18835	7.14838	7.23584	7.1446	7.19888	7.14254	7.15174	7.17642	7.07224	6.96764	6.7324	6.80646	6.94892	6.77188	6.77188	6.88283	6.7311	6.79246	6.72092	6.72045	6.978
ILMN_1657455	7.42517	7.38115	7.41638	7.43055	7.4395	7.28789	7.46331	7.17383	7.34062	7.27394	7.11349	7.22926	7.31931	7.28243	6.80923	6.99125	7.09101	7.01887	6.96975	7.28794	7.1789	7.10644
ILMN_1657470	7.88009	7.98888	7.67244	7.78365	7.72072	8.00389	7.61159	8.13537	7.81457	8.1118	7.34346	7.33513	7.46143	7.37512	7.95473	7.8354	7.42679	8.06829	7.76225	7.74765	7.69855	8.29753
ILMN_1657472	7.08068	7.04731	7.11222	7.06474	7.28375	7.19888	7.10231	7.1289	7.04526	7.14066	6.70355	6.80025	6.60406	6.63748	6.78041	6.71086	6.7405	6.75187	6.77305	6.73226	6.69014	6.76797
ILMN_1657475	8.27069	8.25454	8.1018	8.40587	8.6069	7.5986	8.05285	8.13537	8.36995	7.68728	8.16656	9.00813	8.92569	8.25595	7.51665	7.69992	8.55312	7.86148	8.21138	8.23346	8.5204	7.76363
ILMN_1657476	7.15292	7.11444	7.07224	7.08956	7.1382	7.10291	7.09031	7.1382	7.02617	7.18215	6.80437	6.68059	6.79664	6.68636	6.87693	6.66778	6.87162	6.72978	6.68443	6.89827	6.65039	6.6723
ILMN_1657478	7.28583	7.37027	7.47338	7.4395	7.31212	7.53205	7.34697	7.59555	7.35492	7.56629	7.25715	7.73851	7.2976	7.33607	7.30324	7.645	7.58355	7.61975	7.39483	7.42119	7.32353	7.58366
ILMN_1657483	8.92627	8.67996	8.71529	8.89696	8.54998	8.17939	8.60166	7.76614	8.6721	7.63752	8.24274	8.39228	8.08802	8.26995	7.55262	7.21862	7.96107	7.31597	7.71511	8.0119	7.59548	7.53514
ILMN_1657486	7.22364	7.03737	7.13008	7.07224	7.16965	7.13759	7.2135	7.2135	7.13008	7.2042	6.80758	6.88559	6.83736	6.59468	6.90421	6.83731	6.77222	6.93321	6.7938	6.69024	6.78052	6.72762
ILMN_1657495	8.22484	9.24299	8.4909	8.38418	8.44811	8.53862	8.81757	8.26102	8.85186	8.41768	8.30701	8.47102	8.45213	8.68359	8.83195	8.913	8.80826	8.48984	8.59282	8.32878	8.41527	8.53037
ILMN_1657497	7.1042	7.0857	7.05129	7.04793	7.08876	7.11955	7.08068	7.16257	7.15344	7.009	6.59444	6.65458	6.76435	6.63994	6.7324	6.78294	6.77021	6.61158	6.56118	6.73346	6.63516	6.74776
ILMN_1657505	7.04582	7.09467	7.06249	7.07224	7.02736	7.0109	7.05986	7.08192	7.07099	7.06122	6.86258	6.67893	6.74647	6.74548	6.71209	6.77188	6.71186	6.97168	6.77546	6.6889	6.77642	6.71154
ILMN_1657509	7.26903	7.41889	7.37216	7.393	7.46873	7.21794	7.46331	7.26357	7.34952	7.2135	7.37623	6.9889	7.39943	7.37947	7.57161	7.46305	7.24572	7.07366	7.27015	7.19799	7.17438	7.26632
ILMN_1657515	7.8183	7.57069	7.85817	7.69031	7.8457	7.2983	7.72193	7.41931	7.67554	7.18215	7.30199	7.64752	7.37233	7.63116	6.86453	7.0452	7.29102	7.05765	7.46793	7.42936	7.16892	7.18087
ILMN_1657527	7.28789	7.22762	7.19138	7.26563	7.26903	7.17141	7.48731	7.17383	7.31409	7.44053	6.94026	6.7385	6.77063	6.96397	6.69126	6.92613	6.94601	6.71186	6.87636	6.77778	6.52765	6.58371
ILMN_1657529	7.11366	7.13293	7.11222	7.16965	7.1042	7.11955	7.13061	7.07099	7.13872	7.06122	6.70577	6.7416	6.71295	6.71519	6.70566	6.63984	6.71427	6.68787	6.75925	6.73226	6.70586	6.71793
ILMN_1657547	7.24039	7.44914	7.32319	7.36061	7.32482	7.11222	7.37666	7.15174	7.37066	7.31076	6.95631	6.95708	6.99141	7.0404	6.94816	6.8246	7.09101	7.3535	6.98735	6.93097	7.24453	6.8918
ILMN_1657550	7.31478	7.30728	7.21794	7.30123	7.4395	7.67584	7.43654	7.59555	7.25796	7.65915	7.28898	6.85622	6.96371	7.31449	7.71498	7.30752	7.2377	7.41337	7.35772	7.39934	7.42323	8.16191
ILMN_1657554	7.21211	7.27602	7.15746	7.20684	7.26903	7.92489	7.14254	7.83763	7.14512	7.52381	7.00331	6.97347	7.25622	6.95808	8.10708	7.44342	7.14878	7.54196	7.13642	6.82377	7.02423	7.77692
ILMN_1657571	7.1382	7.04731	7.19138	7.08956	7.11291	7.01894	7.04793	7.1042	7.1042	7.02964	6.64923	6.81446	6.85373	6.69751	6.77315	6.67762	6.76905	6.77778	6.5867	6.70965	6.79588	6.78264
ILMN_1657572	7.12163	7.12436	7.13008	7.23584	7.1289	7.11955	7.15232	7.1042	7.17642	7.10291	6.70019	6.71508	6.74419	6.71882	6.77432	6.64807	6.73371	6.85481	6.67887	6.73696	6.86166	6.7416
ILMN_1657589	7.12163	7.12436	7.12074	7.08192	7.12074	7.19888	7.02736	7.11444	7.1042	7.02964	6.68765	6.54907	6.68507	6.54841	6.67697	6.71641	6.7405	6.63936	6.66522	6.60199	6.79881	6.6723
ILMN_1657591	7.1446	7.12436	7.04304	7.06474	7.20528	7.04793	7.04793	7.05986	7.09674	7.05001	6.83577	6.7198	6.80159	6.83067	6.73956	6.84713	6.8117	6.69809	6.86936	6.69945	6.79279	6.79694
ILMN_1657592	7.01743	7.13293	7.07224	7.20684	7.12074	7.36061	7.07018	7.1042	7.13872	7.08192	6.75647	6.84981	6.62886	6.67491	6.67312	6.63119	6.72616	6.71186	6.67595	6.67762	6.72781	6.82428
ILMN_1657595	7.04582	7.04731	7.02231	7.05656	7.00822	6.98085	7.07018	7.02528	7.12163	7.01894	6.69271	6.63506	6.70942	6.66089	6.55711	6.64144	6.53484	6.59639	6.56968	6.62708	6.76415	6.64123
ILMN_1657600	7.08068	7.0268	7.02231	7.06474	7.07099	7.1289	7.03737	7.1382	7.05266	7.13061	6.70355	6.87693	6.62272	6.78474	6.81299	7.03359	6.71295	6.79601	6.92521	6.85493	6.9254	6.639
ILMN_1657603	7.12163	7.13293	7.11222	7.24039	7.15344	7.10291	7.08068	7.2135	7.1042	7.24861	6.88673	6.81147	6.82539	6.8087	6.72485	6.73861	6.65418	6.73501	6.88382	6.78986	6.80045	6.80975
ILMN_1657606	7.03737	7.09467	7.08192	7.00726	7.07099	7.23667	7.08068	7.1042	6.99798	7.17141	6.73123	6.59022	6.61775	6.75259	6.66303	6.70121	6.7586	6.71439	6.71133	6.6889	6.78841	6.78986
ILMN_1657607	7.00822	7.05656	7.01218	7.08192	6.99048	7.07347	7.04793	7.04731	7.14512	6.99878	6.67731	6.74919	6.65281	6.67366	6.71606	6.7587	6.67198	6.65672	6.65142	6.64178	6.78705	6.62356
ILMN_1657611	7.16819	7.0857	7.09154	7.03095	7.12074	7.15344	7.09031	7.11444	7.00726	7.09154	6.7163	6.79871	6.61158	6.78021	6.72364	6.73371	6.70942	6.58259	6.80313	6.64902	6.64701	6.73521
ILMN_1657612	11.6615	11.5379	11.8741	11.4571	11.4169	11.6711	11.6788	11.841	11.3815	11.487	12.0499	11.8456	11.8998	12.0442	11.9613	11.3483	11.9897	12.0499	11.9897	12.0246	11.8762	12.2319
ILMN_1657618	7.09031	7.1042	7.09154	7.08956	7.1042	7.11222	7.14254	7.1042	7.07988	7.09154	6.75197	6.85144	6.73142	6.81375	6.73662	7.05055	6.76669	6.88469	6.84291	6.83667	6.78705	6.79539
ILMN_1657619	7.27902	7.09467	7.08192	7.15431	7.1382	7.06474	7.03737	7.07099	7.08956	7.02964	6.62859	6.82998	6.55142	6.63129	6.56403	6.66636	6.61809	6.5655	6.63538	6.64346	6.63516	6.64495
ILMN_1657624	8.20261	8.30888	8.62611	8.3358	8.52177	8.87009	8.5712	9.67279	8.47074	9.24208	8.65749	8.74677	8.84762	8.78671	9.20187	8.9925	8.59202	9.37766	8.65244	8.30788	8.53895	9.05058
ILMN_1657627	7.26357	7.14313	7.20062	7.2193	7.23472	7.20684	7.05986	7.20005	7.21211	7.42033	6.89725	6.72474	6.80861	6.9026	6.74537	6.86434	7.00308	6.89111	6.79747	6.89643	6.7324	6.80717
ILMN_1657631	6.99878	7.06611	7.04304	7.13476	7.1042	7.15344	7.08068	7.09337	7.13872	7.15232	6.64807	6.76955	6.76308	6.85004	6.75776	6.73371	6.62356	6.69576	6.64712	6.63936	6.63689	6.66558
ILMN_1657632	9.2147	9.40704	9.35999	9.38473	9.25049	8.84313	8.98802	8.1097	9.35346	8.34165	8.94785	8.74269	8.84594	9.04358	7.34716	8.38931	8.69079	7.78626	8.23481	9.18152	8.69321	7.1643
ILMN_1657634	7.08068	7.04731	7.13989	7.15098	7.06249	7.08253	7.09031	7.01218	7.13008	7.09154	6.79756	6.78483	6.6973	6.72364	6.83453	6.79995	6.80798	6.64993	6.72892	6.73446	6.75516	6.7883
ILMN_1657639	7.06249	7.03737	7.09154	7.1042	7.06249	7.01894	7.10231	7.02528	7.12163	7.06122	6.70942	6.75248	6.54445	6.78128	6.7405	6.72343	6.67832	6.77675	6.69677	6.63772	6.74021	6.7587
ILMN_1657643	7.09031	7.04731	7.04304	7.05656	7.07099	7.10291	7.04793	7.05986	7.05266	7.10291	6.80189	6.68221	6.69126	6.874	6.77675	6.72902	6.84071	6.69328	6.68579	6.78362	6.77441	6.74776
ILMN_1657652	6.97138	6.99577	7.05129	7.038	7.05493	7.18952	7.04793	7.05986	7.2042	6.99878	6.68418	6.58452	6.70454	6.64369	6.60132	6.65084	6.58503	6.67438	6.59795	6.57749	6.54744	6.79694
ILMN_1657656	7.13008	7.1042	7.04304	7.14254	7.16125	7.1446	7.17273	7.07099	7.16184	7.12163	6.72333	6.75712	6.87124	6.81375	6.79712	6.71925	6.72892	6.70211	6.63726	6.72965	6.65534	6.70689
ILMN_1657662	7.16819	7.04731	7.20062	7.08956	7.2135	7.02807	7.07018	7.01218	7.09674	7.17141	6.78986	6.95309	6.73142	6.75516	6.51087	6.7429	6.71793	6.7949	6.83292	6.78986	6.71559	6.81692
ILMN_1657665	7.08068	7.13293	7.16498	7.11291	7.1446	7.08253	7.11291	7.07099	7.09674	7.19299	6.68765	6.74605	6.71173	6.57943	6.78294	6.6722	6.7619	6.87536	6.7618	6.72485	6.85074	6.64123
ILMN_1657673	7.30676	7.30728	7.3806	7.23584	7.30823	7.11955	7.2135	7.08192	7.28789	7.31076	6.86821	6.78358	6.70832	6.89884	6.87846	6.77452	6.79747	6.70821	6.84392	6.87506	6.82947	6.72902
ILMN_1657679	7.81328	7.93685	7.77708	7.98056	7.8457	7.7376	7.76582	7.67481	7.88453	7.7106	7.672	8.21954	7.8208	7.84929	7.99614	7.84956	7.55449	7.83448	7.83363	7.77587	7.6269	8.11091
ILMN_1657680	7.43463	7.56548	7.47945	7.54619	7.5053	7.76614	7.67297	7.71314	7.40836	7.58825	8.07164	8.27752	8.11855	7.88969	9.06819	8.68467	7.81862	8.24274	8.11735	8.29549	8.1417	8.54344
ILMN_1657682	8.51855	8.11335	8.08649	7.92645	7.87162	8.20008	8.15683	8.3528	7.96439	8.5091	7.26694	7.7829	7.21571	7.48538	7.71523	7.65795	7.23239	7.79702	7.53397	7.48048	7.23922	7.95326
ILMN_1657683	7.40422	7.26903	7.25313	7.23584	7.24582	7.1446	7.26855	7.46935	7.29221	7.24861	6.95983	7.04504	6.86286	6.92385	6.8332	6.76415	6.94312	6.94777	6.99266	7.00558	7.0366	7.15535
ILMN_1657686	7.17383	7.14313	7.17383	7.19579	7.16125	7.15344	7.19299	7.18634	7.08956	7.2135	6.82009	6.82407	6.76669	6.83311	6.72892	6.80541	6.80348	6.74647	6.78032	6.77664	6.7385	6.77675
ILMN_1657697	7.4149	7.41889	7.5758	7.52972	7.41838	7.63752	7.45378	7.34183	7.51211	7.78661	6.92352	6.83844	6.86286	6.8087	6.98285	6.97979	6.831	6.78555	6.87636	6.81712	6.8554	7.03117
ILMN_1657701	7.61763	7.29482	7.44873	7.2193	7.44598	7.63216	7.77749	7.48541	7.55439	7.41164	7.45195	7.65615	7.60211	7.47353	7.20948	7.17495	7.47821	7.20973	7.23506	7.09825	7.30587	7.01271
ILMN_1657708	7.4149	7.45378	7.5455	7.35573	7.4998	7.31961	7.4264	7.8784	7.34062	7.78012	7.65441	6.87518	7.08732	7.30826	7.22908	7.85288	7.2436	7.26874	7.18976	7.2809	7.09239	8.6114
ILMN_1657709	7.03737	7.06611	6.98085	7.18215	7.1042	7.00197	7.13061	7.04731	7.14512	7.32319	6.6129	6.7071	6.6862	6.76665	6.8464	6.73605	6.63247	6.73871	6.84963	6.73226	6.84492	6.76925
ILMN_1657711	7.1382	7.13293	7.11222	7.08956	7.1042	7.13759	7.08068	7.11444	7.1042	7.16257	6.67371	6.75088	6.79558	6.72978	6.73002	6.72343	6.80224	6.72715	6.65142	6.63511	6.79588	6.72605
ILMN_1657715	7.11366	7.1042	7.07224	7.05656	7.12074	7.10291	7.08068	7.11444	7.11366	7.06122	6.69158	6.66248	6.6862	6.50803	6.63726	6.84152	6.68071	6.60155	6.65799	6.58794	6.74441	6.70965
ILMN_1657722	11.7536	10.9051	11.3001	10.887	11.0519	10.9204	11.1541	11.3616	11.2612	11.4197	10.1396	9.56267	9.5518	9.92577	9.79306	9.08415	9.70573	10.1044	10.0168	10.2429	9.62732	9.84002
ILMN_1657728	7.17383	7.16965	7.14838	7.2135	7.08876	7.11955	7.20347	7.1289	7.1975	7.15232	6.78986	6.76317	6.68507	6.71772	6.69916	6.6861	6.68341	6.74528	6.8292	6.67909	6.67595	6.67595
ILMN_1657729	7.1382	7.11444	7.06249	7.04793	7.01894	7.0109	7.07018	7.09337	7.03531	7.06122	6.70222	6.66248	6.74528	6.77895	6.73662	6.63538	6.65799	6.86927	6.86157	6.70222	6.64701	6.67909
ILMN_1657744	7.67844	7.79538	7.69636	7.65734	7.67844	7.51248	7.72873	7.58035	7.74413	7.74654	7.35726	7.65615	7.5916	7.51291	7.305	7.30434	7.51975	7.57375	7.4393	7.64112	7.46179	7.34558
ILMN_1657746	7.67338	7.84539	7.66014	7.72911	7.74746	7.54619	7.72193	7.68967	7.92069	7.69607	7.75384	7.32552	7.47693	7.9497	6.94993	7.13508	7.57739	7.24332	7.58054	7.60632	7.42047	7.17088
ILMN_1657749	7.16819	7.13293	7.08192	7.02373	7.01894	7.24685	7.01743	7.02528	7.06122	7.18215	6.80758	6.9079	6.74528	6.69158	6.79111	7.03883	6.79747	6.71681	6.76435	6.95975	6.81024	6.73521
ILMN_1657750	7.18215	7.13293	7.20062	7.28583	7.19138	7.20684	7.28789	7.32264	7.26406	7.31076	6.89325	6.88185	6.8408	6.86474	7.04872	6.85968	6.94503	6.85968	6.78389	6.6889	6.87105	6.8487
ILMN_1657754	7.44914	7.42469	7.36005	7.41207	7.3295	7.1804	7.34697	7.1382	7.42803	7.2042	7.02759	6.95141	6.99504	7.04112	6.78041	6.64668	6.99224	6.79871	6.88685	6.90402	6.92813	6.81138
ILMN_1657760	7.13008	7.04731	7.05129	7.1289	7.1446	7.07347	7.13061	7.07099	7.17642	7.10291	6.94164	6.86296	6.77895	6.85592	6.8207	6.7429	6.85873	6.81355	6.79986	6.82815	7.0081	6.85502
ILMN_1657766	6.99048	7.04731	6.99048	7.04793	7.01894	7.07347	7.09031	6.98847	7.11366	7.02964	6.7416	6.64981	6.66705	6.67246	6.61992	6.62822	6.69751	6.61158	6.69529	6.58173	6.68361	6.76009
ILMN_1657769	7.25313	7.21986	7.11222	7.30728	7.28789	7.09276	7.24685	7.45315	7.16184	7.2983	6.94425	7.58287	7.31704	7.1526	7.19884	7.46608	7.38549	7.59095	7.16402	6.8567	7.47117	7.03351
ILMN_1657771	7.29482	7.22762	7.30054	7.29425	7.48756	7.92827	7.49771	7.56548	7.28103	7.73777	6.92159	6.85789	7.13611	7.24015	8.02694	7.6927	7.26393	7.20386	7.17898	7.03735	7.05179	7.4965
ILMN_1657790	7.13008	7.11444	7.12074	7.07224	7.23982	7.18952	7.07018	7.07099	7.12163	7.18215	6.82225	6.76317	6.69014	6.63376	6.66303	6.88	6.87595	6.74528	6.66926	6.88185	6.9254	6.9026
ILMN_1657796	7.08068	7.28789	7.15746	7.24039	7.26406	7.19888	7.13061	7.18634	7.16184	7.24861	6.98302	6.91683	6.92027	6.83394	6.83745	6.72212	7.0433	6.89643	6.94043	6.80717	7.03533	6.93002
ILMN_1657797	9.11456	9.43106	9.21176	9.17117	9.44752	9.92596	9.07958	9.71928	9.37349	9.68347	9.77552	9.96121	10.0068	9.80618	9.17873	10.0725	10.2564	10.3002	10.0551	10.0557	10.2184	9.70032
ILMN_1657803	7.09031	7.13293	7.05129	7.02373	7.1042	7.03737	7.19299	7.07099	7.11366	7.09154	6.73123	6.78032	6.72111	6.7583	6.60018	6.73861	6.79529	6.77778	6.8021	6.87377	6.72343	6.72605
ILMN_1657810	10.6	10.7802	10.3078	10.7528	10.7935	10.8296	10.7372	10.6233	10.9797	10.7618	10.6848	11.1287	10.7683	10.5193	10.2786	11.1725	11.2081	10.935	10.9505	10.5676	11.0713	10.1539
ILMN_1657812	7.06249	7.0857	7.16498	7.07224	7.16965	7.21794	7.02736	7.1042	7.06122	7.05001	6.67947	6.73555	6.60645	6.72364	6.6301	6.7416	6.58938	6.83189	6.64305	6.68044	6.78986	6.74776
ILMN_1657816	7.09753	7.0857	7.08192	7.1042	7.17642	7.1289	7.08068	7.09337	7.04526	7.14066	6.76669	6.62979	6.67356	6.69895	6.74537	6.79847	6.65304	6.6826	6.58561	6.73814	6.64519	6.7416
ILMN_1657818	7.06249	7.0857	7.04304	7.11291	7.19138	7.1289	7.16257	7.07099	7.08956	7.11291	6.66926	6.69742	6.89199	6.70243	6.73956	6.83597	6.7586	6.76298	6.79496	6.85004	6.71396	6.71793
ILMN_1657823	7.08068	7.0857	7.06249	7.06474	7.06249	7.07347	7.10231	7.08192	7.07988	7.16257	6.80955	6.79871	6.73391	6.89742	6.80798	6.8584	6.81874	6.92792	6.71925	6.83564	6.7703	6.75059
ILMN_1657827	7.06249	7.16125	7.07224	7.08192	7.03737	7.16257	7.16257	7.22877	7.04526	7.14066	6.67251	6.72147	6.84713	6.72762	6.69663	6.63119	6.77796	6.7399	6.74388	6.60884	6.71882	6.66008
ILMN_1657832	7.1042	7.12436	7.15746	7.12074	7.15344	7.17141	7.10231	7.01218	7.12163	7.15232	6.66926	6.6991	6.70222	6.63259	6.70423	6.67606	6.55368	6.67575	6.66226	6.65418	6.7324	6.72762
ILMN_1657836	7.11366	7.20471	7.24582	7.15098	7.24582	7.43463	7.23522	7.28257	7.21794	7.40157	7.19348	6.94528	7.30826	7.13718	7.39781	7.50883	7.28073	7.3809	7.30303	7.13756	7.19924	7.3068
ILMN_1657837	7.27902	7.24861	7.26903	7.13476	7.3591	7.22762	7.20347	7.18634	7.29776	7.31076	6.80541	7.14729	6.88136	6.86108	6.9155	7.08187	6.91473	6.82089	6.79496	6.78841	6.86633	6.94639
ILMN_1657838	7.09031	7.12436	7.13008	7.1289	7.11291	7.1289	7.14254	7.1042	7.03531	7.009	6.63376	6.74919	6.87663	6.66089	6.67947	6.71086	6.78149	6.74151	6.75414	6.72092	6.64902	6.63598
ILMN_1657847	7.08068	7.0268	7.08192	7.09529	7.16965	7.1804	7.14254	7.09337	7.1042	7.08192	6.64807	6.7198	6.74031	6.75624	6.70198	6.64401	6.60132	6.63405	6.77915	6.68269	6.71396	6.70211
ILMN_1657854	7.03737	7.12436	7.09154	7.09529	7.09529	7.07347	7.05986	7.20005	7.12163	7.11291	6.74528	6.64144	6.79558	6.66594	6.65672	6.74419	6.81772	6.61752	6.71793	6.75034	6.69014	6.53506
ILMN_1657855	7.11366	7.06611	7.18215	7.08192	7.07099	7.17141	7.16257	7.02528	7.1042	7.10291	6.9063	6.69742	6.77296	6.83969	6.874	6.59818	6.80935	6.7324	6.68024	6.78483	6.78841	6.82733
ILMN_1657857	9.42402	9.72241	9.62779	9.46247	9.77816	9.12895	9.92502	9.13186	10.109	9.09988	9.539	9.16568	9.60305	9.56664	8.56429	8.37399	9.25222	9.39107	9.57559	9.70348	9.43842	9.10276
ILMN_1657860	7.09031	7.12436	7.25313	7.1042	7.11291	7.11955	7.11291	7.1382	7.05266	7.08192	6.78483	6.84513	6.78756	6.71154	6.69529	6.73052	6.7619	6.82733	6.85812	6.70365	6.85245	6.59872
ILMN_1657862	9.5932	9.64725	10.016	9.4347	9.61056	9.99919	9.66556	10.0121	9.53228	10.2853	9.55775	9.16884	9.51018	9.53457	9.63977	9.71722	9.70393	9.94733	10.2144	9.86727	9.68611	9.81775
ILMN_1657864	8.38418	8.62342	8.90185	8.74318	8.70352	8.77209	8.55655	8.68277	8.58051	8.24004	8.88201	9.03398	9.01224	9.10894	8.85844	8.602	8.36382	8.46596	8.59856	8.83022	8.43707	8.81524
ILMN_1657868	7.17383	7.0857	7.11222	7.2193	7.16125	7.11955	7.10231	7.04731	7.13008	7.05001	6.80086	6.8418	6.86896	6.83067	6.74647	6.84463	6.82977	6.65936	6.68316	6.73226	6.83909	6.94993
ILMN_1657870	7.08068	7.04731	7.14838	7.07224	7.05493	7.01894	7.13061	7.1042	7.15344	7.12163	6.86355	6.72474	6.79558	6.69024	6.7883	6.78851	6.75034	6.78294	6.77063	6.59191	6.72485	6.7399
ILMN_1657871	7.5053	7.24861	7.35235	7.36582	7.26903	7.28789	7.30823	7.15174	7.2042	7.08192	6.7324	6.79266	6.76552	6.80428	6.69014	6.93735	6.67957	6.83698	6.77178	6.67762	6.71254	6.48906
ILMN_1657873	8.34214	8.69548	8.25828	8.31809	8.23302	8.44811	8.24304	8.42142	8.44811	8.49906	7.80367	7.92073	7.9725	7.82419	8.28324	8.34946	7.92513	8.43217	8.07891	7.85356	7.94006	8.47518
ILMN_1657874	7.16073	7.0268	7.08192	7.09529	7.11291	7.13759	7.02736	7.17383	7.13872	7.10291	6.70089	6.7071	6.8564	6.78358	6.80541	6.91865	6.83564	6.79121	6.85592	6.78705	6.69463	6.75553
ILMN_1657884	7.75468	7.58741	7.82758	7.44676	7.69508	7.82163	7.80367	8.47074	7.47199	7.7106	7.32236	7.72715	7.2077	7.35443	7.36556	7.30833	7.30539	7.4161	7.17898	7.41989	7.48094	7.14985
ILMN_1657886	7.08068	7.06611	7.09154	7.08956	7.1446	7.21794	7.08068	7.17383	7.09674	7.16257	6.65936	6.85481	6.74647	6.63994	6.69663	6.76533	6.67291	6.65809	6.63399	6.70222	6.84189	6.73836
ILMN_1657888	7.09031	7.14313	6.969	7.13476	7.06249	7.1289	7.04793	7.16257	7.09674	7.10291	6.82846	6.87322	6.84496	6.67491	6.71873	6.93874	6.61051	6.72605	6.88136	6.76468	6.73096	6.74605
ILMN_1657891	7.12163	7.1042	7.07224	7.04793	7.04582	7.17141	7.13061	7.17383	7.18215	7.22527	6.91006	6.68735	6.78756	6.78474	6.82428	6.72212	6.83462	6.77546	6.90542	6.61158	6.7385	6.76448
ILMN_1657892	11.237	11.3738	10.928	11.3001	10.5812	9.40035	10.3987	9.07067	10.9257	9.22791	10.9529	11.079	10.4213	10.637	10.7883	9.51598	10.5343	8.62226	9.88427	9.65837	9.84312	9.59182
ILMN_1657893	8.26759	8.14575	8.20223	8.39284	8.30788	7.64399	8.39877	7.66054	8.26549	7.73777	8.57042	8.91663	8.88322	8.44786	7.37224	7.40899	8.62432	7.9703	8.25382	8.30074	8.16252	7.46876
ILMN_1657898	7.15292	7.22762	7.21794	7.1289	7.1042	7.09276	7.18215	7.1042	7.07099	7.09154	6.78052	6.65137	6.69385	6.73911	7.03565	6.86434	6.80673	6.85205	6.78389	6.85802	6.72485	6.77675
ILMN_1657913	7.06249	7.263	7.17383	7.1289	7.15344	7.19888	7.12163	7.20005	7.17642	7.22527	6.86543	6.74776	6.78861	6.87555	6.71489	6.81384	6.78149	6.72857	6.75156	6.74905	6.67877	6.87377
ILMN_1657914	7.09031	7.0762	7.01218	7.02373	7.07099	7.03737	7.04793	7.03675	7.09674	7.10291	6.53651	6.6479	6.62517	6.68012	6.54234	6.72343	6.75388	6.57832	6.64434	6.68166	6.74905	6.68389
ILMN_1657932	7.29942	7.0762	7.13989	7.06474	7.09529	7.00197	7.08068	7.1382	7.23522	7.14066	6.83045	6.7651	6.82177	6.95929	6.72616	6.88594	7.00466	6.801	6.77546	6.80304	6.95725	6.6723
ILMN_1657946	7.09753	7.05656	7.07224	7.17642	7.07099	7.19888	7.09031	7.1042	7.2042	7.08192	6.77546	6.6479	6.86633	6.80541	6.78168	6.68226	6.64144	6.79121	6.77305	6.80717	6.61992	6.77213
ILMN_1657948	7.03737	7.04731	7.01218	7.1289	7.1382	7.07347	7.13061	7.08192	7.13008	7.08192	6.78389	6.82407	6.63516	6.62989	6.73401	6.75197	6.68454	6.64063	6.60386	6.6129	6.68361	6.56441
ILMN_1657949	9.4563	9.60793	9.4141	9.37088	9.25807	10.1128	9.44225	9.98206	9.37609	10.054	9.12848	8.92975	9.26576	9.40461	9.77112	10.0226	9.29515	9.76716	9.64683	9.64117	9.5198	10.0426
ILMN_1657950	7.23522	7.35492	7.14838	7.2574	7.3639	7.1446	7.11291	7.00141	7.17642	7.32319	6.63259	6.58805	6.72702	6.83189	6.67697	6.79995	6.64144	6.63046	6.78032	6.77072	6.70931	6.69024
ILMN_1657955	6.94122	7.16965	7.06249	7.05656	7.19888	7.04793	7.11291	7.07099	7.07988	7.17141	6.7587	6.6889	6.80646	6.83189	6.8156	6.84713	6.8946	6.81589	6.91865	6.80189	6.81305	6.81407
ILMN_1657958	7.18215	7.13293	7.05129	7.13476	7.05493	7.06474	7.14254	7.05986	7.09674	7.10291	6.67138	6.61978	6.63888	6.52674	6.63876	6.66926	6.67721	6.5867	6.71925	6.67627	6.66543	6.58526
ILMN_1657959	7.12163	7.0857	7.14838	7.11291	7.11291	7.1446	7.13061	7.1289	7.16184	7.08192	6.71264	6.62822	6.72702	6.68238	6.67312	6.86277	6.72747	6.64993	6.65672	6.65142	6.75516	6.83189
ILMN_1657962	7.05493	7.12436	7.15746	7.1289	7.1042	7.05656	7.04793	7.04731	6.98847	7.09154	6.62154	6.63984	6.59901	6.70376	6.6979	6.7429	6.65534	6.67924	6.83171	6.75681	6.64701	6.65304
ILMN_1657968	9.32638	9.90197	10.4187	9.89596	10.1701	10.9061	9.98481	10.5378	9.8415	10.0779	9.65421	9.40286	9.84137	9.97681	9.84002	10.1075	9.3866	9.33603	9.85433	10.0761	9.59663	10.31
ILMN_1657972	7.20528	7.11444	7.03236	7.07224	7.04582	7.03737	7.23522	6.98847	7.07099	7.17141	6.74528	6.71824	6.77063	6.70783	6.63876	6.66063	6.63888	6.74776	6.77546	6.89561	6.83221	6.72762
ILMN_1657977	9.27415	9.77689	9.91952	10.0119	9.86505	9.38516	9.73807	9.32552	9.42644	9.24208	9.65212	9.91855	9.65757	9.54669	7.95308	9.56132	10.2654	9.4575	9.68391	9.87872	9.95095	8.64506
ILMN_1657983	8.94289	8.55307	8.52911	8.82156	8.87367	8.7998	8.48786	9.09226	8.75859	9.16741	9.06475	8.65495	8.68131	9.07656	9.35437	9.51794	9.22145	9.63355	9.52072	8.98773	9.26662	9.95186
ILMN_1657985	7.09753	7.0857	7.18215	7.2135	7.25082	7.31961	7.2135	7.18634	7.1975	7.2042	6.65534	6.89808	6.83969	6.79881	6.7883	6.83301	6.85771	6.85106	6.98575	6.6889	6.71882	6.8156
ILMN_1657991	7.13008	7.0762	7.01218	7.14254	7.1446	7.16257	7.11291	7.05986	7.25796	7.12163	6.72333	6.7324	6.84824	6.8127	6.8207	6.7429	6.58383	6.89643	6.6979	6.75414	6.69463	6.73836
ILMN_1657993	7.59793	7.55439	7.43463	7.49672	7.23982	7.37027	7.48731	7.15174	7.25796	7.46068	6.64455	6.67731	6.84612	6.8945	6.79588	6.8554	6.72892	6.65672	6.69677	6.92879	6.831	6.97627
ILMN_1657996	7.16819	7.19579	7.13008	7.15431	7.1382	7.09276	7.07018	7.1042	7.11366	7.10291	6.81492	6.71054	6.75088	6.73802	6.62637	6.80717	6.7512	6.86108	6.7401	6.77778	6.85683	6.6856
ILMN_1658010	7.1446	7.2135	7.11222	7.1042	7.12074	7.13759	7.04793	7.32264	7.16184	7.14066	6.89884	6.71824	6.68372	6.72243	6.81299	6.62356	6.65188	6.7399	6.70478	6.68394	6.87645	6.98327
ILMN_1658015	7.24039	7.24861	7.24582	7.15431	7.1382	7.1446	7.19299	7.07099	7.19024	7.12163	6.75197	6.65458	6.73391	6.67887	6.69261	6.76009	6.78483	6.68166	6.74388	6.82491	6.72343	6.75712
ILMN_1658016	7.05493	7.11444	7.10231	7.03095	7.04582	7.16257	6.98337	6.97808	7.05266	7.13061	6.65418	6.65281	6.64144	6.68124	6.72892	6.66341	6.64401	6.62002	6.69271	6.79986	6.77915	6.68735
ILMN_1658017	7.15292	7.1042	7.12074	7.16965	7.16125	7.16257	7.09031	7.1289	7.1042	7.14066	6.88132	6.84824	6.8408	6.64369	6.72111	6.67062	6.7859	6.64317	6.77063	6.79404	6.74627	6.79694
ILMN_1658018	7.09753	7.18835	7.12074	7.07224	7.1042	7.11955	7.14254	7.1289	7.05266	7.14066	6.83577	6.90192	6.68879	6.76053	6.73401	6.5776	6.54509	6.72715	6.73642	6.80945	6.662	6.8127
ILMN_1658019	7.00822	7.0857	7.04304	7.06474	7.07099	7.03737	7.11291	7.09337	7.03531	7.10291	6.7252	6.8332	6.69596	6.6889	6.60018	6.65084	6.58938	6.61752	6.75156	6.67627	6.6979	6.7429
ILMN_1658022	7.11366	7.0762	7.04304	7.08956	7.2135	7.04793	7.16257	7.02528	7.1975	7.2042	6.76435	6.78986	6.86896	6.75259	6.72485	6.75752	6.90156	6.7868	6.71519	6.86633	6.83909	6.80437
ILMN_1658027	7.15292	7.13293	7.14838	7.06474	6.91406	7.10291	7.10231	7.11444	7.07099	7.2135	6.61536	6.67731	6.77432	6.74419	6.72111	6.8246	6.67198	6.72715	6.79111	6.79215	6.76105	6.7416
ILMN_1658028	7.74344	7.57605	7.5758	7.53249	7.55105	7.43463	7.67297	7.38115	7.55869	7.5493	6.9114	6.82407	7.07628	6.89662	6.99892	6.86713	7.02735	6.94425	6.88019	6.91627	6.78367	6.64679
ILMN_1658033	7.08068	7.1042	7.06249	7.06474	7.07099	7.16257	7.05986	7.03675	7.29221	7.02964	6.66189	6.67575	6.84824	6.88253	6.67575	6.80407	6.75624	6.78032	6.65936	6.62058	6.69463	6.7868
ILMN_1658034	7.02736	7.0268	7.04304	7.18215	7.09529	7.15344	7.00642	7.11444	7.13872	7.02964	6.63984	6.72631	6.80861	6.85373	7.11912	6.57894	6.68454	6.73371	6.59915	6.57614	6.66719	6.70365
ILMN_1658036	7.11366	7.16125	7.13008	7.1042	7.09529	7.28789	7.27902	7.22877	7.07988	7.14066	6.75977	6.99304	6.75088	6.77652	6.68071	6.76009	6.74776	6.80758	6.74647	6.72485	6.81731	6.71295
ILMN_1658040	7.15292	6.99577	7.07224	7.12074	7.07099	7.07347	7.07018	7.07099	7.16965	7.09154	6.76435	6.61978	6.79558	6.62989	6.76797	6.73371	6.80798	6.80758	6.78756	6.75034	6.72485	6.6889
ILMN_1658044	7.12163	7.13293	7.05129	7.05656	7.1289	7.11955	7.10231	7.05986	7.08956	7.05001	6.79329	6.55877	6.75563	6.63876	6.62215	6.86553	6.66063	6.75925	6.89014	6.62708	6.76552	6.89982
ILMN_1658053	9.15152	8.77961	9.0746	8.95981	9.02803	8.12658	9.05577	8.45318	8.90098	8.1074	9.62629	9.49619	9.31847	9.55266	8.87813	8.97713	9.35049	8.44731	9.03122	9.45693	9.07268	8.54284
ILMN_1658058	7.16073	7.0857	7.01218	6.98085	7.1042	7.23667	7.11291	7.03675	7.05266	7.05001	6.57638	6.81147	6.65028	6.68519	6.82203	6.6861	6.62215	6.74776	6.7071	6.7185	6.72932	6.68059
ILMN_1658060	7.13008	7.20471	7.09154	7.22527	7.1042	7.13759	7.14254	7.22877	7.06122	7.23584	6.77188	6.67251	6.80531	6.75176	6.75776	6.6889	6.86176	6.79601	6.74528	6.82915	6.75367	6.65511
ILMN_1658067	7.13008	7.0857	7.10231	7.16257	7.16125	7.09276	7.15232	7.22877	7.11366	7.18215	6.77769	6.68221	6.66385	6.68238	6.67805	6.77063	6.7416	6.76171	6.7887	6.67523	6.64356	6.8127
ILMN_1658071	7.21211	7.35492	7.25313	7.33334	7.3639	7.61159	7.22527	7.53298	7.38115	8.12424	6.97446	6.81283	6.99847	6.92273	7.52109	8.30701	7.40686	8.01175	7.29113	7.18387	7.68936	8.15522
ILMN_1658072	7.15292	7.09467	7.14838	7.07224	7.06249	7.15344	7.15232	7.07099	7.09674	7.09154	6.58794	6.75088	6.80407	6.70509	6.69394	6.7844	6.67062	6.75669	6.75156	6.68529	6.64701	6.60659
ILMN_1658074	7.04582	6.95396	7.05129	7.03095	7.00077	7.0109	7.16257	7.1289	6.92114	7.05001	6.66303	6.71352	6.7416	6.72364	6.90421	6.67062	6.7405	6.67051	6.77178	6.69677	6.83475	6.75712
ILMN_1658080	7.43463	7.4395	7.35235	7.32783	7.34183	7.1289	7.2135	7.15174	7.52596	7.18215	6.96619	6.80975	6.84824	7.08618	6.7938	6.77315	7.02423	6.67051	6.84291	6.86633	6.79588	6.79246
ILMN_1658081	7.12163	7.16965	7.18215	7.09529	7.2135	7.08253	7.2135	7.16257	7.13872	7.15232	6.82009	6.84824	6.81237	6.65809	6.77072	6.77602	6.63516	6.79601	6.67072	6.71741	6.65723	6.75712
ILMN_1658083	7.24039	7.31409	7.23522	7.43055	7.38115	7.19888	7.29776	7.36061	7.39106	7.25947	6.86258	6.94528	6.95124	7.04561	6.89884	7.33393	7.08824	7.20856	7.26303	7.24115	7.16754	6.93695
ILMN_1658093	7.11366	7.15232	7.17383	7.07224	7.16125	7.11955	7.23522	7.15174	7.15344	7.13061	6.52122	6.55268	6.59818	6.66089	6.57894	6.62968	6.7859	6.59782	6.6722	6.65418	6.70931	6.75553
ILMN_1658094	7.1042	7.0857	7.09154	7.06474	7.06249	7.09276	7.10231	7.1042	7.07099	7.05001	6.71376	6.78358	6.61276	6.7583	6.84923	6.67924	6.65672	6.60609	6.77915	6.74647	6.66719	6.66915
ILMN_1658104	7.15292	7.15232	7.13008	7.13476	7.1446	7.06474	7.17273	7.1382	7.07099	7.06122	6.88132	6.84513	6.7429	6.7859	6.74905	6.7429	6.67957	6.7868	6.80655	6.73966	6.89701	6.82428
ILMN_1658108	7.11366	6.99577	7.10231	7.08956	7.1042	7.07347	7.08068	7.11444	7.05266	7.01894	6.78052	6.73371	6.70942	6.78806	6.64827	6.72212	6.75972	6.64753	6.5727	6.70965	6.76552	6.90985
ILMN_1658109	7.09753	7.11444	7.11222	7.16257	7.03737	7.11222	7.08068	7.2135	7.03531	7.16257	6.79569	6.69405	6.6603	6.75176	6.66145	6.69158	6.77915	6.66099	6.66385	6.64774	6.72045	6.7399
ILMN_1658110	7.27902	7.15232	7.26903	7.27602	7.26406	7.09276	7.27902	7.38115	7.16965	7.14066	7.07186	6.86139	6.65799	6.93841	7.69344	7.00178	6.98903	6.84353	6.93351	6.86553	6.91618	6.90125
ILMN_1658111	7.11366	7.1042	7.10231	7.2135	7.08876	7.04793	7.08068	7.1382	7.09674	7.07224	6.80841	6.85144	6.78861	6.7583	6.75414	6.73605	6.7586	6.75669	6.86157	6.75286	6.7385	6.70043
ILMN_1658114	7.08068	7.15232	7.12074	7.09529	7.12074	7.15344	7.16257	7.22877	7.1975	7.15232	6.72212	6.72147	6.831	6.65942	6.72616	6.8584	6.69529	6.70211	6.64712	6.82143	6.61775	6.77675
ILMN_1658121	9.57431	10.0194	10.3618	10.1651	10.1627	10.3088	9.84681	10.2092	9.97087	10.2061	10.1153	10.0194	10.2049	10.0938	9.45806	9.9915	9.55847	9.47567	10.1502	10.4049	9.62827	10.1624
ILMN_1658123	7.16819	7.16965	7.13989	7.19579	7.16125	7.19888	7.12163	7.02528	7.1975	7.17141	6.93604	6.74441	6.71528	6.71044	7.13114	6.87693	6.81058	6.83597	6.78986	6.68394	6.77178	6.8918
ILMN_1658143	7.3087	7.15232	7.14838	7.15431	7.11291	7.03737	7.26855	7.05986	7.07988	7.14066	6.75099	6.68735	6.83969	6.93482	6.75904	6.96462	6.71672	6.70566	6.88136	6.77072	6.56792	6.92802
ILMN_1658144	7.57993	7.78661	7.79538	7.77984	7.68118	7.31961	7.78482	7.24582	7.72624	7.14066	7.3677	7.80505	7.47266	7.33543	6.98285	7.15789	7.28427	6.96636	7.23196	6.99458	6.85074	6.82112
ILMN_1658145	7.07224	7.14313	7.03236	6.99798	6.92358	7.03737	7.02736	7.1289	6.95782	7.05001	6.6889	6.81283	6.7619	6.73576	6.79246	6.65237	6.69886	6.65281	6.6979	6.65534	6.69618	6.58729
ILMN_1658152	7.16819	7.0762	7.07224	7.00726	7.15344	7.1289	7.04793	7.07099	7.00726	7.32319	6.83969	6.82051	6.85024	6.69895	6.76925	6.7479	6.94137	6.84243	6.83385	6.69271	6.81024	6.90622
ILMN_1658155	7.08068	7.06611	7.20062	7.06474	7.15344	7.10291	7.10231	7.11444	7.02617	7.06122	6.76542	6.71054	6.72702	6.75624	6.88	6.75463	6.65799	6.74151	6.70577	6.79986	6.74021	6.69564
ILMN_1658158	7.00822	7.05656	7.13008	6.98085	7.00822	7.11955	7.01743	7.03675	7.1042	7.03871	6.83475	6.65799	6.76552	6.8246	6.62497	6.68765	6.75972	6.697	6.72762	6.7429	6.7385	6.66719
ILMN_1658160	8.58327	9.10159	8.44918	8.5874	8.89344	9.25739	9.01659	8.94151	9.117	9.04547	9.53331	9.30822	9.50316	9.94913	8.12051	8.65128	8.97458	8.96441	9.11127	8.65854	8.65443	8.76128
ILMN_1658163	7.02736	7.1042	7.13989	7.05656	7.1042	7.11222	7.07018	7.1289	7.07099	7.08192	6.85583	6.71352	6.73263	6.77895	6.68361	6.69024	6.7405	6.76426	6.69271	6.65418	6.81731	6.71154
ILMN_1658173	7.08068	7.14313	7.11222	7.16965	7.15344	7.10291	7.03737	7.1042	7.07099	7.12163	6.64455	6.73371	6.65153	6.58283	6.8564	6.65799	6.65799	6.6512	6.61005	6.73966	6.65926	6.65166
ILMN_1658175	7.22877	7.16125	7.17383	7.25082	7.16125	7.16257	7.20347	7.53298	7.29221	7.32319	7.14435	7.51698	7.14773	7.31622	8.00316	7.81906	7.50242	8.17443	7.35137	7.23026	7.81946	7.47092
ILMN_1658176	7.1382	7.16125	7.15746	7.15098	7.1382	7.15344	7.13061	7.1382	7.09674	7.12163	6.77188	6.87142	6.69945	6.79694	6.83745	6.82098	6.76308	6.78158	6.69405	6.79529	6.70433	6.73685
ILMN_1658182	7.4395	7.38668	7.37216	7.51454	7.41207	7.65672	7.47002	7.62181	7.51629	8.09357	6.80189	6.82051	6.90737	6.84773	6.76797	6.75197	6.81772	6.79747	6.77675	6.78483	6.68206	6.9145
ILMN_1658187	7.06249	7.11444	7.07224	7.07224	7.11291	7.16257	7.04793	7.08192	7.04526	6.98847	6.67491	6.7071	6.66248	6.68372	6.73662	6.72212	6.71793	6.76298	6.75048	6.76689	6.71075	6.79847
ILMN_1658190	7.08068	7.0857	7.13008	7.20684	7.11291	7.08253	7.13061	7.1042	7.13008	7.009	6.74991	6.65137	6.66705	6.70783	6.62215	6.70699	6.70942	6.65418	6.64712	6.69553	6.72191	6.7416
ILMN_1658200	7.06249	7.0268	7.11222	7.06474	7.08068	7.08253	7.07018	7.02528	7.03531	7.03871	6.67731	6.60438	6.67989	6.62356	6.76009	6.68765	6.64015	6.63538	6.71793	6.58913	6.74441	6.68226
ILMN_1658206	7.04582	7.16125	7.13989	7.15098	7.1289	7.16257	7.14254	7.09337	7.08956	7.10291	6.76094	6.6448	6.82875	6.82762	6.78168	6.79847	6.73716	6.78806	6.78609	6.65534	6.84904	6.65304
ILMN_1658207	7.25313	7.21986	7.16498	7.20684	7.1289	7.10291	7.16257	7.26357	7.06122	7.15232	6.77188	6.71186	6.95197	6.76533	6.88	6.78851	6.82875	7.08715	6.69014	6.81375	6.80189	6.80975
ILMN_1658210	6.98085	7.09467	7.01218	7.12074	7.00822	7.13759	7.08068	7.08192	7.09674	7.01894	6.6642	6.73706	6.62272	6.71396	6.668	6.73371	6.64923	6.60609	6.56968	6.72846	6.68664	6.70509
ILMN_1658212	7.09031	7.0762	7.05129	7.04793	7.00077	7.1446	7.13061	7.11444	7.08956	7.10291	6.67595	6.62497	6.67731	6.75259	6.75658	6.7493	6.68787	6.62143	6.6084	6.69158	6.58067	6.75553
ILMN_1658214	6.99878	7.14313	7.07224	7.038	7.06249	7.05656	7.08068	7.05986	7.01607	7.10291	6.76955	6.81446	6.73901	6.66341	6.47786	6.70821	6.66063	6.92159	6.65142	6.64646	6.58067	6.68735
ILMN_1658221	7.1042	7.14313	7.17383	7.16965	7.1289	7.05656	7.13061	7.24582	7.12163	7.10291	6.69394	6.66099	6.61667	6.60024	6.6979	6.60896	6.54348	6.55493	6.70478	6.80304	6.76415	6.69231
ILMN_1658231	7.1446	7.19579	7.26229	7.16965	7.16125	7.11955	7.16257	7.30054	7.17642	7.19299	6.93604	6.83988	6.77063	6.82579	6.82846	6.89343	6.80348	6.85968	7.14958	6.94052	6.84071	7.04708
ILMN_1658232	7.05493	7.11444	7.13989	7.15098	7.12074	7.19888	7.12163	7.1042	7.11366	7.03871	6.60285	6.72631	6.60539	6.72134	6.61187	6.5923	6.5639	6.70066	6.83597	6.76009	6.7703	6.7429
ILMN_1658235	7.17383	7.0857	7.13008	7.08192	7.1446	7.09276	7.09031	7.15174	7.16184	7.01894	6.77865	6.66926	6.83969	6.72364	6.74419	6.70699	6.82447	6.76542	6.8021	6.81037	6.71559	6.9889
ILMN_1658237	7.1042	7.13293	7.02231	7.08192	7.04582	7.10291	7.08068	7.16257	7.16965	7.18215	6.69886	6.63337	6.77546	6.7583	6.73802	6.73741	6.80446	6.65672	6.88685	6.87693	6.70433	6.59266
ILMN_1658243	7.17383	7.12436	7.14838	7.13476	7.19888	7.31961	7.26855	7.16257	7.14512	7.2042	6.86355	7.24317	6.85144	6.874	6.93151	6.85255	6.91908	6.88722	6.87033	6.90746	6.84189	6.9615
ILMN_1658247	8.86624	9.08543	8.47585	7.4395	8.93972	8.13774	8.36263	7.59555	8.91926	7.71719	8.30601	8.64097	8.46678	8.36394	7.38968	9.10495	8.76	7.956	7.0562	8.50199	8.12888	7.41182
ILMN_1658254	7.1382	7.16965	7.07224	7.1042	7.12074	7.10291	7.18215	7.00141	7.07099	7.03871	6.86821	6.81283	6.80531	6.58538	6.71489	6.92159	6.74647	6.72978	6.84291	6.72846	6.78841	6.81835
ILMN_1658257	7.12163	7.0857	7.06249	7.1042	7.06249	7.08253	7.14254	7.04731	7.11366	7.09154	6.74991	6.71824	6.7619	6.80975	6.74905	6.75463	6.72978	6.84243	6.70053	6.62564	6.6722	6.83354
ILMN_1658259	8.98469	9.42231	9.10299	9.48744	9.26785	8.93349	9.37287	9.16037	9.21645	9.02366	9.46464	9.07693	9.139	9.506	9.45693	8.99465	9.1435	9.21199	8.99824	9.14213	8.92548	9.47254
ILMN_1658261	7.00822	7.32015	7.20062	7.1289	7.23472	7.27801	7.08068	7.18634	7.2042	7.24861	6.89218	6.88897	6.9321	6.89742	7.08081	6.80407	6.86808	6.82447	6.89742	6.88283	6.8584	6.80559
ILMN_1658265	7.12163	7.18835	7.17383	7.07224	7.01894	7.05656	7.29776	7.11444	7.07099	7.11291	6.65936	6.77895	6.62999	6.62497	6.80304	6.59818	6.7859	6.74647	6.63726	6.558	6.79747	6.70365
ILMN_1658266	7.04582	7.09467	7.06249	7.20171	7.11291	7.09276	7.11291	7.15174	7.08956	7.2042	6.69631	6.7416	6.68879	6.78705	7.04122	6.69024	6.75034	6.69809	6.7071	6.7071	6.70931	6.88858
ILMN_1658271	7.13008	7.0762	7.12074	7.15098	7.05493	7.15344	7.2135	7.18634	7.24685	7.13061	6.93904	6.86474	6.86176	6.84704	6.80923	6.77188	7.01207	6.89643	6.92273	6.94052	6.87774	6.87377
ILMN_1658277	7.09031	6.99577	7.07224	7.15098	7.08068	7.07347	7.07018	7.1382	7.05266	7.22527	6.71054	6.77895	6.76945	6.71519	6.8117	6.77315	6.68702	6.81958	6.94328	6.70222	6.78841	6.92633
ILMN_1658278	7.1042	7.05656	7.11222	7.01434	7.16125	7.04793	7.09031	7.16257	7.05266	7.05001	6.72443	6.70566	6.67481	6.64369	6.60132	6.58515	6.70699	6.65936	6.61276	6.63645	6.5892	6.53867
ILMN_1658283	12.7576	12.8187	12.9286	12.5502	12.5953	12.7739	12.9952	12.8296	12.6546	12.8365	11.9216	11.4807	11.5782	11.6391	11.6738	10.995	11.3543	11.8638	11.5592	11.6436	11.5639	11.7603
ILMN_1658289	7.80909	8.07727	8.05158	8.03126	7.85624	7.88839	8.00154	8.31701	7.93256	8.01168	7.7843	7.73546	8.10639	7.75368	7.34339	7.3523	8.19535	7.85593	7.85544	7.95735	8.16114	7.73541
ILMN_1658290	8.06698	8.16986	8.27593	8.16871	8.38137	9.07608	8.65761	8.74441	8.24986	8.54931	8.23251	8.61878	8.45396	8.18431	8.92115	8.76291	8.35255	8.77741	8.61398	8.08838	8.61045	8.60647
ILMN_1658299	7.12163	7.00578	7.14838	7.08956	7.20528	7.18952	7.07018	7.08192	7.01607	7.09154	6.66063	6.74441	6.63772	6.66719	6.70043	6.70699	6.70454	6.78806	6.70478	6.58794	6.72932	6.65304
ILMN_1658301	7.03737	7.05656	7.18215	7.17642	7.08068	7.18952	7.05986	7.07099	7.07099	7.12163	6.70355	6.81589	6.73263	6.71154	6.71741	6.64401	6.64923	6.7311	6.60386	6.73096	6.68664	6.77537
ILMN_1658302	7.16073	7.11444	7.08192	7.18215	7.19888	7.22762	7.2135	6.92987	7.23522	7.22527	6.67491	6.88897	6.84824	6.71519	6.77315	6.76797	6.77915	6.9175	6.80901	6.80945	6.96928	6.80975
ILMN_1658304	7.06249	7.0857	7.09154	6.96243	7.03737	7.07347	7.08068	7.17383	7.03531	7.11291	6.68529	6.63337	6.68372	6.62733	6.62497	6.67481	6.78032	6.68787	6.58427	6.75681	6.76552	6.74419
ILMN_1658310	7.09031	7.03737	7.03236	7.13476	7.02736	7.05656	7.18215	7.05986	7.06122	7.06122	6.73371	6.72781	6.73263	6.85004	6.82947	6.63387	6.73371	6.76426	6.7618	6.63772	6.65723	6.68059
ILMN_1658315	7.1382	7.16965	7.12074	7.038	7.07099	7.1446	7.13061	7.07099	7.16965	7.17141	6.78986	6.72147	6.66493	6.71519	6.75658	6.64272	6.93281	6.85711	6.66226	6.73966	6.78052	6.88568
ILMN_1658318	7.07224	7.15232	7.05129	7.04793	7.12074	7.11955	7.12163	7.1382	7.08956	7.10291	6.61536	6.74776	6.72343	6.64658	6.65926	6.71376	6.67595	6.66099	6.78389	6.7185	6.74776	6.63598
ILMN_1658327	7.97784	7.98888	8.048	8.12733	8.23547	8.44577	7.97817	8.55112	8.17309	8.7381	8.25759	8.20274	8.27076	8.44247	8.77283	8.80043	8.6296	7.91138	8.59282	8.55081	8.73133	8.65271
ILMN_1658333	7.16819	7.0268	7.02231	7.01434	7.08068	7.09276	7.11291	7.03675	7.1042	7.16257	6.84301	6.63506	6.65153	6.82579	6.82579	6.64401	6.87377	6.69328	6.6818	6.9689	6.83341	6.8156
ILMN_1658337	8.56657	7.79111	8.34597	8.30846	7.7512	7.64399	8.34403	9.08952	8.04542	7.93628	8.07521	8.69513	7.96732	8.24242	9.73865	9.77948	9.14604	9.70865	8.92647	8.55145	8.88164	9.31241
ILMN_1658346	6.99048	7.09467	7.00141	7.1042	7.08068	7.0109	7.07018	6.96454	7.06122	7.06122	6.6889	6.51675	6.63772	6.58538	6.55897	6.5168	6.54348	6.6129	6.63259	6.65936	6.66719	6.58151
ILMN_1658351	8.71505	8.62342	9.0078	8.65876	8.69001	9.34395	8.56657	9.31092	8.55279	8.98451	9.21983	8.88747	9.31602	9.18269	9.16884	9.37766	9.28845	9.6298	9.40286	9.07006	9.54507	9.23
ILMN_1658356	7.03737	7.09467	7.06249	7.05656	7.05493	6.97138	7.12163	7.07099	7.05266	7.07224	6.65672	6.62822	6.63139	6.71882	6.58393	6.81384	6.64401	6.74647	6.66926	6.55516	6.63855	6.89671
ILMN_1658363	7.02736	7.05656	7.02231	7.1042	7.03737	7.17141	7.07018	6.96454	6.9495	7.02964	6.6642	6.6889	6.68238	6.70783	6.60896	6.74658	6.65672	6.5867	6.70965	6.60742	6.79444	7.07772
ILMN_1658369	7.17383	7.14313	7.13008	7.14254	7.12074	7.24685	7.13061	7.24582	7.08956	7.18215	6.77652	6.74919	6.87859	6.82377	6.8464	6.83161	6.8332	6.83969	7.02727	6.73966	6.84189	6.66915
ILMN_1658373	7.89368	7.98073	7.88453	7.63339	7.92851	8.12976	7.89186	7.46935	7.93256	7.92382	7.84542	8.0624	8.1661	7.63609	7.49466	7.54859	7.77421	7.6523	7.83028	7.33264	7.68392	7.26508
ILMN_1658375	7.12163	7.0857	7.06249	7.11291	7.03737	7.08253	7.13061	7.1382	7.09674	7.06122	6.64455	6.65281	6.64535	6.60634	6.62908	6.62822	6.58139	6.76298	6.75669	6.73814	6.60909	6.7196
ILMN_1658376	7.06249	7.16125	7.13989	7.12074	7.06249	7.08253	7.15232	7.08192	7.14512	7.12163	6.82539	6.62329	6.57872	6.76764	6.67575	6.71641	6.66063	6.75787	6.84291	6.7859	6.5867	6.72092
ILMN_1658381	7.05493	7.19579	7.08192	7.07224	7.1289	7.1446	7.08068	7.08192	7.16184	7.05001	6.64113	6.64634	6.70577	6.78128	6.70423	6.57614	6.64519	6.89643	6.78149	6.59795	6.64701	6.75059
ILMN_1658383	8.15192	8.04265	7.62976	7.98777	7.37614	7.18952	7.45378	7.88789	7.88009	7.41164	7.70696	8.13268	8.25315	8.09348	7.92713	8.79657	7.76435	7.31221	8.13591	7.60003	8.40488	7.74328
ILMN_1658384	7.1382	7.1042	7.08192	7.07224	7.1042	7.06474	7.02736	7.15174	7.16965	7.08192	6.65166	6.67387	6.83306	6.69518	6.75904	6.72616	6.79165	6.7844	6.74279	6.83988	6.67387	6.83058
ILMN_1658386	7.18215	7.04731	7.07224	7.05656	7.06249	7.15344	7.07018	7.11444	7.05266	7.009	6.67595	6.84357	6.74647	6.78128	6.71352	6.6889	6.71186	6.68937	6.8268	6.81497	6.72932	6.80975
ILMN_1658396	7.18691	7.12436	7.05129	7.04793	7.15344	7.07347	7.09031	7.1382	7.1042	7.11291	6.76094	6.73706	6.81835	6.76764	6.77778	6.69024	6.59818	6.76426	6.75156	6.79529	6.67877	7.02759
ILMN_1658398	7.1042	7.15232	7.06249	7.12074	7.08068	7.02807	7.01743	7.1042	7.16965	7.05001	6.83969	6.70376	6.8776	6.56686	6.6129	6.69405	6.77796	6.64753	6.66926	6.62708	6.71882	6.70832
ILMN_1658399	7.34062	7.52025	7.42723	7.46331	7.44598	7.18952	7.24685	7.17383	7.33563	7.36005	7.19679	6.7429	7.08548	6.98312	6.874	7.06762	7.45098	7.18717	7.10962	7.21294	7.11332	6.84559
ILMN_1658405	7.08068	7.20471	7.04304	7.038	7.02736	7.11222	7.09031	7.11444	7.14512	7.09154	6.79329	6.6642	6.7165	6.70912	6.6862	6.63689	6.7324	6.74151	6.64005	6.76242	6.73696	6.71641
ILMN_1658407	7.39106	7.46027	7.48419	7.43055	7.58106	7.28789	7.24685	7.45315	7.37666	7.2135	7.17956	7.32005	7.159	7.09061	7.16264	7.10324	7.06582	6.87978	7.12678	7.25715	7.3102	6.79847
ILMN_1658411	9.0222	9.37687	9.61864	9.26992	9.82454	9.78384	9.64947	9.37198	9.87179	9.34341	9.42487	9.4874	9.38275	9.20187	8.96643	9.40898	9.41367	9.51111	9.34677	9.73004	9.31033	9.17811
ILMN_1658413	7.09753	7.16125	7.10231	7.17642	7.1042	7.11222	7.05986	7.05986	7.19024	7.22527	6.61536	6.58283	6.70942	6.7859	6.73662	6.70243	6.64015	6.73871	6.68735	6.73576	6.69271	6.65304
ILMN_1658415	7.09031	7.16125	7.05129	7.14254	7.16125	7.1289	7.14254	7.20005	7.09674	7.17141	6.6129	6.7776	6.73802	6.68012	6.77315	6.64923	6.75516	6.7429	6.65672	6.72353	6.60539	6.66719
ILMN_1658416	10.4395	10.3348	9.81674	10.2578	9.90017	8.54703	9.85907	8.22484	10.041	9.47396	9.58936	9.31514	9.37248	9.83373	8.23519	8.02889	9.21803	8.20533	8.58417	9.41294	9.38548	8.03074
ILMN_1658420	7.33616	7.20471	7.32319	7.2574	7.30054	7.35358	7.19299	7.34183	7.30123	7.32319	6.91006	6.96322	6.99615	6.88059	6.874	7.18672	7.06241	7.00838	7.00641	6.96958	7.02248	7.03117
ILMN_1658422	7.17383	7.20471	7.21794	7.26563	7.2135	7.16257	7.2135	7.16257	7.16965	7.2042	6.80086	6.80313	6.93762	6.92498	6.84253	7.01362	6.97475	7.01575	6.86474	6.86176	7.0947	6.90622
ILMN_1658425	7.53298	7.69543	7.61763	7.51454	7.55995	7.48023	7.60533	7.30054	7.5343	7.41164	7.65906	7.68678	7.76235	7.53016	7.65895	7.61716	7.58477	7.47406	7.55385	7.63737	8.10001	7.6672
ILMN_1658426	7.05493	7.16965	7.10231	7.11291	7.04582	7.17141	7.15232	7.05986	7.13872	7.13061	6.77865	6.72147	6.80407	6.70243	6.76797	6.82225	6.9005	6.7868	6.90416	6.66742	6.69014	6.75238
ILMN_1658427	6.99878	7.06611	7.10231	7.08956	7.09529	7.04793	7.11291	7.08192	7.07099	7.02964	6.84184	6.84981	6.65418	6.66946	6.46548	6.79279	6.6745	6.75414	6.72045	6.72965	6.86166	6.68735
ILMN_1658437	10.3531	9.65514	9.83766	9.58656	9.74911	8.8837	9.94285	8.76306	9.95626	9.18562	9.61991	10.2615	9.69421	9.9117	8.72202	9.27402	9.88355	9.14983	9.58483	9.58878	9.9887	8.69531
ILMN_1658439	7.28583	7.21986	7.11222	7.24039	7.20528	7.16257	7.22527	7.28257	7.22364	7.31076	6.61775	6.65458	6.65153	6.97446	6.63876	6.65936	6.68206	6.68166	6.70842	6.7616	6.63376	6.63598
ILMN_1658448	7.1446	7.13293	7.13989	6.98912	7.01894	7.0109	7.09031	7.08192	7.02617	7.19299	6.72092	6.87142	6.68113	6.75958	6.72892	6.93604	6.70089	6.81835	6.87419	6.76828	6.78545	6.80437
ILMN_1658452	7.18215	7.1042	7.07224	7.06474	7.07099	7.09276	7.08068	7.00141	7.01607	7.02964	6.73023	6.75248	6.65281	6.66719	6.90824	6.82612	6.63772	6.84612	6.7553	6.54964	6.65926	6.61051
ILMN_1658460	8.74318	7.95856	8.45631	8.37228	8.10755	8.76747	8.24986	8.66072	7.97662	9.03181	7.98015	8.26184	7.99212	8.26942	9.04458	8.53238	8.40714	8.87194	8.1324	8.46361	8.7251	8.38355
ILMN_1658464	10.6366	10.8462	10.9242	10.8593	11.021	10.9287	10.447	10.928	10.7015	11.1742	10.3704	9.67848	9.77185	10.2654	10.0725	10.0837	9.90356	10.3497	10.4564	10.5267	10.1903	10.6165
ILMN_1658467	7.12163	7.04731	6.969	7.11291	7.01894	7.04793	7.01743	7.07099	7.15344	7.09154	6.71264	6.64634	6.68745	6.63994	6.63726	6.6204	6.75516	6.59782	6.71519	6.86108	6.74905	6.83484
ILMN_1658468	7.13008	7.15232	7.06249	7.07224	7.05493	7.13759	6.99577	7.09337	7.09674	7.01894	6.71508	6.64634	6.65926	6.64923	6.69916	6.54124	6.81516	6.67697	6.56646	6.71489	6.74301	6.70832
ILMN_1658469	7.27902	7.15232	7.34555	7.48303	7.40638	7.44053	7.4114	7.72582	7.28789	7.49821	7.18759	7.11461	7.13733	7.3271	7.2085	7.16895	7.1631	7.30434	7.23864	7.38962	7.24757	7.10644
ILMN_1658472	9.98515	10.3924	10.1925	9.98701	10.2636	10.6537	10.0969	10.6813	10.3899	10.5182	10.6668	10.1911	10.5676	10.7547	11.0381	11.3323	10.8161	10.7204	10.6616	10.9139	10.7475	11.2547
ILMN_1658477	7.1382	7.11444	7.09154	7.14254	7.15344	7.09276	7.11291	7.15174	7.12163	7.12163	6.72443	6.91282	6.75444	6.66719	6.82321	6.68226	6.70566	6.81138	6.70355	6.79529	6.78367	6.67909
ILMN_1658480	7.02736	7.0762	7.10231	7.02373	7.1289	7.07347	7.08068	7.1042	6.92114	7.06122	6.65799	6.81147	6.57237	6.67757	6.68879	6.61916	6.58583	6.61752	6.558	6.68166	6.75669	6.60659
ILMN_1658481	7.25313	7.11444	7.18215	7.17642	7.18215	7.39616	7.19299	7.2135	7.22364	7.33662	6.76094	6.73096	6.98177	6.89577	7.09929	6.88741	6.79404	6.8332	6.98087	6.8523	6.81305	6.85502
ILMN_1658483	7.06249	7.0857	7.11222	7.13476	7.08068	7.17141	7.01743	7.11444	7.1042	7.06122	6.8127	6.71824	6.85144	6.801	6.88916	6.72902	6.77021	6.78806	6.67356	6.72616	6.69014	6.74776
ILMN_1658485	7.04582	7.15232	7.04304	7.13476	7.02736	7.22762	7.15232	7.2135	7.11366	7.05001	6.7324	6.72631	6.8564	6.81702	6.76426	6.82612	6.69529	6.64753	6.7887	6.79215	6.64356	6.69024
ILMN_1658486	9.42402	9.26872	9.94522	9.21678	9.80022	10.4888	9.86472	10.1651	9.48135	10.2891	10.1681	10.119	10.2841	9.83852	9.94858	9.94098	10.579	9.79833	10.4301	10.5409	10.798	10.2922
ILMN_1658491	7.04582	7.12436	7.11222	7.20171	7.12074	7.10291	7.08068	7.05986	7.14512	7.02964	6.62507	6.68059	6.72702	6.58538	6.76925	6.59662	6.71065	6.67051	6.6818	6.62849	6.72932	6.75712
ILMN_1658494	7.87218	8.28473	8.76764	9.02605	9.49358	12.1767	10.483	11.7111	9.79174	12.0288	10.6338	10.9816	11.9738	8.92333	11.3785	12.9584	11.4362	11.3615	12.2416	11.1979	12.9165	9.89792
ILMN_1658495	7.08068	7.13293	7.13008	7.17642	7.1382	7.08253	7.2135	7.07099	7.1042	7.22527	6.74528	6.68735	6.73032	6.76665	6.71606	6.76925	6.70003	6.81589	6.66522	6.72353	6.60347	6.63236
ILMN_1658498	7.1042	7.16965	7.11222	7.09529	7.16125	7.08253	7.13061	7.18634	7.14512	7.15232	6.81908	6.73096	6.90953	6.78705	6.81049	6.81681	6.80673	6.74647	6.7553	6.77188	6.77915	6.60479
ILMN_1658499	7.1446	7.09467	7.06249	7.08956	7.17642	7.13759	7.11291	7.11444	7.04526	7.09154	6.68664	6.77569	6.76669	6.80541	6.81676	6.72762	6.68071	6.80758	6.79871	6.72616	6.82029	6.83969
ILMN_1658502	7.07224	7.14313	6.99048	7.038	7.04582	7.0109	7.04793	7.08192	7.09674	7.009	6.60034	6.64981	6.69843	6.8087	6.88498	6.68361	6.7586	6.67187	6.64892	6.72222	6.55201	6.73074
ILMN_1658504	7.60273	7.61013	7.79538	7.55075	7.70372	8.56728	7.74278	8.21106	7.81457	8.45253	7.4645	7.30254	7.34246	7.18776	8.17119	7.73311	7.39519	8.23125	7.71099	7.09475	7.82109	8.67639
ILMN_1658513	7.30676	7.68577	7.5455	7.41757	7.64629	7.67584	7.55936	7.56548	7.58196	7.76823	7.35624	7.29492	7.95975	7.3591	7.60192	7.44051	7.21367	7.46042	7.34626	7.34811	7.21395	7.58366
ILMN_1658519	7.34062	7.29989	7.26229	7.35573	7.26406	7.3087	7.28789	7.1042	7.30823	7.31076	6.86462	6.81283	6.90421	6.88424	6.99403	7.11161	6.99224	7.10913	6.92374	6.86286	6.88489	6.86376
ILMN_1658526	7.78906	7.67338	7.64716	7.71139	7.51098	7.67584	7.58825	7.9419	7.80312	7.89934	7.30268	7.71274	7.46876	7.49921	8.12309	8.08994	7.56001	7.88741	7.42073	7.27609	7.65154	7.94035
ILMN_1658531	7.22877	7.28103	7.23522	7.22527	7.31897	7.33726	7.45378	7.04731	7.16184	7.53982	6.74776	6.89023	6.8776	6.85849	6.84773	6.75463	6.88283	6.77063	6.93276	6.90229	6.74441	6.92167
ILMN_1658537	7.12163	7.04731	7.13989	7.12074	7.16965	7.1289	7.13061	7.1289	7.08956	7.10291	6.83475	6.79569	6.83403	6.84152	6.80086	6.80975	6.78149	6.7324	6.70478	6.75904	6.69923	6.82428
ILMN_1658548	7.06249	7.18835	7.08192	6.96243	7.1042	7.21794	7.08068	7.09337	7.16965	7.13061	6.71508	6.72312	6.75325	6.67246	6.69261	6.69997	6.97573	6.81589	6.76435	6.71086	6.71882	6.68226
ILMN_1658556	7.03737	7.03737	7.09154	7.09529	7.1382	7.07347	7.13061	7.1382	7.08956	7.05001	6.65166	6.6642	6.74419	6.65458	6.72233	6.83301	6.64519	6.59485	6.74388	6.76955	6.58067	6.78986
ILMN_1658560	7.07224	7.21986	7.09154	7.11291	7.00077	7.11955	7.02736	7.1042	7.1042	7.12163	6.65534	6.57562	6.79329	6.7687	6.68226	6.76533	6.72045	6.64178	6.65936	6.73966	6.83341	6.75553
ILMN_1658563	7.1382	7.12436	7.03236	7.12074	7.04582	7.1289	7.08068	7.02528	7.18215	7.12163	6.59915	6.65799	6.63772	6.78806	6.64827	6.56533	6.62101	6.68394	6.67741	6.68044	6.65926	6.62708
ILMN_1658569	7.16819	7.1042	7.21794	7.17642	7.07099	7.20684	7.11291	7.36061	7.14512	7.24861	6.64455	6.90585	6.70942	6.75516	6.63876	6.7479	6.63129	6.66636	6.69529	6.72616	6.7385	6.65824
ILMN_1658571	7.1382	7.15232	7.05129	7.15431	7.1289	7.19888	7.14254	7.08192	7.12163	7.17141	6.63738	6.50921	6.58283	6.53005	6.71873	6.59105	6.5655	6.55493	6.72212	6.58318	6.64356	6.72762
ILMN_1658575	6.98085	7.04731	7.08192	7.09529	7.00822	7.07347	7.10231	7.01218	6.95782	7.12163	6.59818	6.62329	6.5079	6.70642	6.47952	6.54958	6.61051	6.63405	6.59795	6.62323	6.55886	6.60083
ILMN_1658576	7.08068	7.03737	7.22762	7.08956	7.18215	7.1446	7.11291	7.11444	7.08956	7.09154	6.7324	6.67731	6.75967	6.51644	6.86966	6.65237	6.71186	6.72092	6.7376	6.82143	6.60539	6.7883
ILMN_1658579	8.10571	8.12444	8.213	8.11424	8.28133	7.59373	8.57505	8.58305	8.10287	7.70372	8.31876	8.59659	8.90208	8.87013	8.16984	8.44511	8.6441	8.7782	8.62766	7.93734	8.47176	8.02252
ILMN_1658585	7.16073	7.1042	7.00141	7.14254	7.02736	7.27801	7.11291	7.1042	7.09674	7.18215	6.80313	6.84824	6.76435	6.74919	6.78168	6.78294	6.73371	6.88829	6.68869	6.75286	6.61775	6.7429
ILMN_1658586	7.05493	7.05656	7.07224	7.05656	7.00822	7.03737	7.03737	7.05986	7.05266	6.97873	6.54267	6.71352	6.71528	6.70243	6.62497	6.60029	6.78264	6.61431	6.54697	6.61927	6.67731	6.64123
ILMN_1658593	7.16819	7.05656	7.15746	7.13476	7.04582	7.1289	7.16257	7.26357	7.08956	7.10291	6.8674	6.71508	6.831	6.85592	6.80407	6.77315	6.73605	6.82225	6.75787	6.71086	6.91913	6.58371
ILMN_1658599	7.18215	7.17898	7.19138	7.08192	7.15344	7.20684	7.27902	7.43836	7.2042	7.07224	6.77938	6.76317	6.80758	6.85181	6.81299	6.78579	6.72978	6.82846	6.79747	6.87105	6.87377	6.7868
ILMN_1658602	7.05493	7.13293	7.13008	7.13476	7.11291	7.1289	7.12163	7.15174	7.02617	7.13061	6.60801	6.59662	6.77178	6.63876	6.67805	6.75624	6.64519	6.63046	6.62647	6.73576	6.67877	6.93482
ILMN_1658605	6.99878	7.1042	7.14838	7.04793	7.05493	7.11955	7.22527	7.16257	7.13872	7.15232	6.65166	6.78168	6.69945	6.64658	6.65523	6.55686	6.61193	6.56962	6.65418	6.68652	6.72045	6.70043
ILMN_1658607	7.09031	7.16965	7.24582	7.22527	7.15344	7.24685	7.18215	7.17383	7.07988	7.31076	6.75197	6.75088	6.60777	6.85849	6.78294	6.7479	6.73479	6.75787	6.73501	6.70478	6.90824	6.89505
ILMN_1658608	7.09753	7.19579	7.11222	7.08192	7.16965	7.13759	7.17273	7.1382	7.2042	7.17141	6.86954	6.70566	6.71406	6.82977	6.79588	6.71793	6.6745	6.7844	6.74776	6.67128	6.83909	6.68735
ILMN_1658618	7.04582	7.06611	7.09154	7.08192	6.9723	7.11955	7.03737	6.96454	7.07099	7.03871	6.49262	6.58805	6.57237	6.62497	6.48464	6.69405	6.52993	6.51721	6.76925	6.56809	6.64356	6.57147
ILMN_1658619	7.09031	7.0857	7.11222	7.01434	7.03737	7.09276	7.20347	7.02528	7.07988	7.12163	6.66683	6.70376	6.64535	6.69158	6.78294	6.7416	6.72616	6.72212	6.60089	6.81805	6.80045	6.68226
ILMN_1658621	7.09753	7.04731	7.20062	7.14254	7.16125	7.1289	7.16257	7.20005	7.1042	7.12163	6.81697	6.86296	6.69596	6.91674	6.81795	6.79121	6.86588	6.84353	6.77778	6.8412	6.76105	6.79995
ILMN_1658623	7.07224	7.09467	7.04304	7.11291	7.12074	7.02807	7.05986	7.04731	7.14512	7.09154	6.72212	6.72781	6.72923	6.79778	6.77432	6.57456	6.84152	6.7844	6.80655	6.68652	6.80189	6.71489
ILMN_1658624	8.45253	8.87206	9.0899	8.46999	8.88645	10.0451	9.35692	9.95673	8.62729	9.74728	8.92032	8.83814	9.29462	8.66314	10.4002	9.95299	9.23644	9.61007	9.52715	9.39891	9.4192	10.3274
ILMN_1658626	7.1042	7.12436	7.17383	7.12074	7.04582	7.16257	7.16257	7.11444	7.09674	7.32319	6.9055	6.71508	6.72004	6.75176	6.85771	6.82744	6.72375	6.85592	6.72616	6.66216	6.81891	6.67387
ILMN_1658628	7.06249	7.1042	6.95684	7.1289	7.19138	7.04793	7.20347	7.01218	7.07988	7.05001	6.74419	6.72781	6.76552	6.63748	6.70043	6.84713	6.7619	6.77432	6.76053	6.84794	6.71741	6.639
ILMN_1658631	7.05493	7.0762	7.11222	7.038	7.1042	7.06474	7.09031	7.07099	7.15344	7.16257	6.75197	6.65281	6.73802	6.69024	6.69394	6.70121	6.65936	6.67924	6.62166	6.70089	6.55886	6.74605
ILMN_1658632	7.27902	7.28103	7.11222	7.19579	7.19138	7.1446	7.12163	7.07099	7.23522	7.12163	6.95179	6.7071	6.92154	6.87506	6.8207	7.04351	6.99458	6.7429	6.93482	6.99261	6.87774	7.07025
ILMN_1658634	7.06249	6.97359	7.18215	7.18215	7.1382	7.15344	7.13061	7.16257	7.12163	7.09154	6.80437	6.96322	6.72004	6.8127	6.79952	6.79279	6.61051	6.86496	6.68443	6.64646	6.8584	6.80841
ILMN_1658635	7.01743	7.0762	7.01218	7.04793	7.00822	7.06474	7.00642	7.2135	7.12163	7.18215	6.84501	6.78168	6.73263	6.65683	6.69529	6.64272	6.78955	6.87162	6.73123	6.69024	6.71741	6.64827
ILMN_1658636	7.27602	7.13293	7.09154	7.18952	7.08876	7.16257	7.13061	7.15174	7.11366	7.16257	6.93321	6.91098	6.95124	6.87506	6.81049	6.8288	6.86097	6.82089	6.9476	6.93482	6.74776	6.77675
ILMN_1658639	8.57966	8.44783	8.29893	8.61885	8.57781	7.47199	8.32874	7.66054	8.27495	7.72559	8.17375	7.8264	8.01317	8.30788	7.39888	7.53317	8.10708	7.60244	7.77626	8.14287	7.84645	7.79634
ILMN_1658647	7.09031	7.13293	7.01218	7.06474	7.08068	7.02807	6.95924	7.04731	7.13008	6.97873	6.52641	6.67387	6.62002	6.74548	6.54715	6.63247	6.59818	6.5079	6.57614	6.72965	6.81305	6.79404
ILMN_1658649	7.09031	7.04731	7.13008	7.15098	7.1382	7.08253	7.07018	7.04731	6.95782	7.06122	6.70454	6.63807	6.76435	6.72616	6.89742	6.71519	6.68702	6.67799	6.70965	6.73576	6.8554	6.66915
ILMN_1658660	7.07224	7.0857	7.11222	7.18952	7.06249	7.13759	7.09031	7.04731	7.03531	7.14066	6.77082	6.72474	6.79778	6.9026	6.79712	6.79847	6.71672	6.78294	6.6084	6.82377	6.82335	6.77537
ILMN_1658675	7.06249	7.19579	7.15746	7.20684	7.16125	7.11955	7.2135	7.30054	7.16184	7.2042	6.83857	6.76669	7.04881	6.84773	6.8332	6.8487	6.71672	6.94155	6.93351	6.97411	7.05999	6.93482
ILMN_1658677	7.16073	7.24861	7.10231	7.12074	7.09529	7.18952	7.01743	7.07099	7.1042	7.08192	6.71376	6.73706	6.74031	6.57943	6.70699	6.81384	6.82977	6.77305	6.86157	6.67002	6.78221	6.7416
ILMN_1658678	7.862	8.03091	7.95597	8.07212	7.85929	7.76614	7.84189	7.67481	7.81888	7.64629	7.30331	7.28765	7.13821	7.61702	7.03152	6.88	7.39042	7.39348	7.32531	7.27841	7.23264	7.41864
ILMN_1658679	7.1446	7.12436	6.95684	7.02373	7.08068	7.1804	7.07018	7.20005	7.18215	7.09154	6.90439	6.79726	6.73662	6.75516	6.90824	6.71925	6.85448	6.72857	6.78149	6.82377	7.13283	6.80437
ILMN_1658684	7.44407	7.37666	7.13008	7.17642	7.19138	7.11222	7.11291	7.09337	7.22364	7.13061	7.34285	7.03701	7.08013	7.30656	6.84501	6.76797	6.99639	6.98181	7.06474	7.02795	7.04724	6.82264
ILMN_1658685	7.08068	7.11444	7.06249	7.06474	7.22706	7.1446	6.99577	7.09337	7.05266	7.05001	6.63984	6.78358	6.70345	6.74311	6.75142	6.66341	6.78149	6.75787	6.68579	6.81147	6.7913	6.7587
ILMN_1658687	7.12163	7.04731	7.09154	7.09529	7.07099	7.02807	7.12163	7.01218	7.07099	7.12163	6.79871	6.71824	6.60132	6.71991	6.62356	6.8567	6.59901	6.81712	6.71519	6.71352	6.87105	6.65304
ILMN_1658689	7.09753	7.11444	7.13989	7.05656	7.12074	7.10291	7.07018	7.1382	7.04526	7.09154	6.874	6.69742	6.63888	6.63598	6.65523	6.74548	6.79529	6.62664	6.7887	6.72747	6.71075	6.71154
ILMN_1658695	7.02736	7.12436	7.06249	6.99798	7.05493	7.06474	7.12163	7.09337	7.12163	7.15232	6.76094	6.90585	6.71065	6.82009	6.66572	6.84602	6.68206	6.73501	6.7401	6.51873	6.72631	6.59662
ILMN_1658697	7.13008	7.0168	7.36005	7.15098	7.2135	7.18952	7.47899	7.16257	7.2294	7.19299	6.82617	6.82714	6.91922	6.88498	6.84923	6.88312	6.75624	7.11579	6.95079	6.98033	6.85997	7.22163
ILMN_1658702	8.12536	8.17939	8.11576	8.09526	8.24969	8.39299	8.45746	8.9922	8.27495	8.29296	8.54084	8.65315	8.34398	8.29393	8.67617	8.81714	8.54416	8.55466	8.56293	8.17729	8.7059	8.41893
ILMN_1658706	7.1382	7.31409	7.15746	7.20171	7.28789	7.23667	7.11291	7.11444	7.24039	7.06122	6.978	6.88371	6.95011	6.84501	6.79847	6.75347	6.95011	6.82225	6.82203	7.23878	6.75806	6.70365
ILMN_1658709	7.03737	7.0762	6.99048	7.03095	7.1042	7.10291	7.15232	7.1042	7.17642	7.11291	6.69631	6.62497	6.63772	6.64658	6.61992	6.74548	6.73371	6.6826	6.71396	6.86108	6.99159	6.79246
ILMN_1658710	7.06249	7.1042	7.10231	7.1042	7.20528	7.09276	7.22527	7.17383	7.1975	7.16257	6.7688	6.94765	6.70577	6.88059	7.02996	6.77895	6.85235	6.90566	6.74647	6.92121	6.88489	6.75712
ILMN_1658713	7.09031	7.18835	7.12074	7.08956	7.03737	7.18952	7.07018	7.09337	7.04526	7.19299	6.70089	6.6642	6.65672	6.71991	6.72485	6.71793	6.71295	6.77305	6.6722	6.64774	6.7703	6.81407
ILMN_1658715	7.1042	7.18835	7.10231	7.1042	7.05493	7.1289	7.25796	7.32264	7.07988	7.06122	6.79664	6.81283	6.83403	6.80428	6.71991	6.8554	6.66705	6.80625	6.77432	6.72485	6.76552	6.74776
ILMN_1658717	7.40157	7.44407	7.44873	7.393	7.41838	7.41207	7.4114	7.50255	7.34062	7.5493	7.35152	6.88732	7.21616	7.09833	7.60702	7.32699	7.24799	7.18717	7.25398	7.11583	7.16043	7.33653
ILMN_1658719	7.1446	7.14313	6.95684	7.02373	7.04582	7.11222	7.08068	7.07099	7.1042	7.06122	6.65418	6.7776	6.71295	6.63376	6.6301	6.6861	6.75972	6.78158	6.7938	6.67002	6.72781	6.75553
ILMN_1658728	7.32482	7.34235	7.47945	7.28583	7.25796	7.36061	7.43654	7.24582	7.17642	7.45116	7.06151	7.43624	7.15404	7.124	6.94034	7.05438	7.13049	7.043	7.10962	7.08484	7.14291	6.89343
ILMN_1658740	7.15292	7.16125	7.18215	7.17642	7.1382	7.19888	7.04793	7.28257	7.19024	7.2135	6.64455	6.88559	6.78275	6.85493	6.94816	6.70566	6.70942	6.74528	6.78756	6.89014	6.80879	6.784
ILMN_1658743	7.33616	7.24097	7.22762	7.26563	7.26406	7.21794	7.27902	7.41931	7.2042	7.09154	7.00625	6.87859	7.07738	7.06696	7.06029	7.01128	6.88604	7.10488	6.88136	7.03222	6.89982	7.02588
ILMN_1658746	7.1042	7.13293	7.17383	7.13476	7.1289	7.16257	7.24685	7.1042	7.15344	7.23584	6.80086	6.83475	6.76308	6.78806	6.8156	6.72212	6.68454	6.71308	6.57916	6.79747	6.70931	6.6723
ILMN_1658748	7.18691	7.17898	7.07224	7.05656	7.04582	7.09276	7.2135	6.92987	7.05266	7.11291	6.65304	6.81726	6.74892	6.75402	6.73123	6.73741	6.70089	6.85968	6.78986	6.77664	6.66375	6.83655
ILMN_1658758	7.04582	7.17898	7.12074	7.17642	7.07099	7.11955	7.07018	7.18634	7.09674	7.15232	6.78806	6.74776	6.74528	6.78021	6.60406	6.75463	6.61051	6.72978	6.64712	6.7071	6.76415	6.78545
ILMN_1658759	8.0924	7.89093	8.06118	7.99561	7.84859	7.77268	8.11589	8.01168	8.04955	7.7762	7.90514	8.29991	7.92577	8.05837	8.37085	7.60842	8.26021	7.98681	8.25978	8.18057	8.02751	8.14506
ILMN_1658768	7.01743	6.99577	7.10231	7.08956	7.00822	6.98085	7.01743	7.20005	7.13008	7.03871	6.79756	6.72781	6.66493	6.7311	6.81299	6.86966	6.78264	6.69809	6.77675	6.67762	6.55718	6.71295
ILMN_1658770	7.12163	7.1042	7.07224	7.15431	7.11291	7.26664	7.07018	7.11444	7.07099	7.11291	6.64113	6.85481	6.82875	6.71882	6.71606	6.70243	6.7586	6.80625	6.84071	6.75142	6.73542	6.73371
ILMN_1658773	7.13008	7.13293	7.09154	7.08956	7.08068	7.13759	7.22527	7.05986	7.11366	7.12163	6.80655	6.85622	6.83403	6.97663	6.69014	6.52861	6.72485	6.63269	6.85273	6.76468	6.61431	6.61573
ILMN_1658798	7.24685	7.16965	7.28583	7.2193	7.16965	7.11955	7.2135	7.05986	7.24039	7.11291	6.92007	6.80189	6.89023	6.96095	6.73802	6.80541	6.88498	6.77778	6.79111	6.90997	6.74301	6.58729
ILMN_1658800	7.70329	7.69031	7.70503	7.74746	7.75962	8.38137	7.68083	8.03042	7.72624	8.21169	7.43643	7.78691	7.82038	7.45274	8.43595	8.1312	7.61733	8.20099	7.8207	7.73006	7.99643	7.89068
ILMN_1658801	7.09031	7.0857	7.14838	7.08956	6.99048	7.13759	7.14254	7.17383	7.11366	7.11291	6.81384	6.73706	6.80304	6.71519	6.78566	6.8246	6.71427	6.66915	6.68735	6.87203	6.64701	6.70043
ILMN_1658802	10.3814	10.2211	10.6089	10.5032	10.7605	10.6045	10.4787	10.7172	10.6908	11.0415	11.1631	11.1653	11.3496	11.2007	11.0225	11.1946	11.3714	11.3751	11.2456	11.2081	11.3042	11.5663
ILMN_1658805	7.05493	7.21986	7.13008	7.30123	7.1382	7.36061	7.18215	7.20005	7.24039	7.15232	6.78389	6.85789	6.81835	6.85592	6.7616	6.8487	6.84914	6.79871	6.71519	6.89561	6.85245	7.05004
ILMN_1658806	7.02736	7.1042	7.07224	7.1042	7.1042	7.08253	7.00642	7.09337	7.14512	7.16257	6.73123	6.53131	6.51768	6.65809	6.67575	6.64923	6.60909	6.56403	6.59167	6.60609	6.64178	6.72762
ILMN_1658807	7.13008	7.0268	7.07224	7.12074	7.1042	7.13759	7.08068	7.02528	7.1042	7.14066	6.87518	6.81446	6.88712	6.74031	6.76797	6.79847	6.72293	6.64993	6.78756	6.83462	6.83221	6.78264
ILMN_1658809	7.27602	7.13293	7.06249	7.12074	7.1289	7.10291	7.10231	7.22877	7.09674	6.96826	6.74419	6.84513	6.74892	6.75048	6.65799	6.73204	6.97057	6.65281	6.68024	6.72222	6.87105	6.6307
ILMN_1658818	7.05493	7.16965	7.06249	6.99798	7.06249	7.18952	7.01743	7.05986	7.16965	7.19299	6.78691	6.67731	6.70454	6.74658	6.703	6.8154	6.72293	6.70699	6.62166	6.72616	6.77778	6.81835
ILMN_1658821	7.20528	7.36582	7.3295	7.23584	7.41838	7.1804	7.23522	7.17383	7.2294	7.32319	6.99466	6.87142	7.03196	7.15527	6.92121	6.98927	7.04447	7.12427	7.07366	7.02795	6.81024	7.00571
ILMN_1658825	7.09031	7.0762	7.11222	7.08192	7.06249	7.02807	6.93292	7.09337	7.04526	7.009	6.70089	6.72631	6.62366	6.67887	6.73401	6.80115	6.70454	6.71681	6.7388	6.7416	6.65534	6.67062
ILMN_1658830	8.43149	8.75565	8.48469	8.7998	8.42682	7.61871	8.60589	7.90703	8.73786	7.62302	8.17746	8.66728	8.81082	8.14185	7.02727	7.58944	8.08587	7.29304	8.35648	8.22283	7.85176	7.05004
ILMN_1658834	7.42517	7.29482	7.30823	7.29425	7.41838	7.39616	7.19299	7.50255	7.26406	7.48756	7.16255	6.83988	6.96563	7.09773	6.94639	7.42563	6.99129	7.13327	6.95333	7.07162	7.0331	7.17088
ILMN_1658835	7.11366	7.11444	7.15746	7.13476	7.1446	7.13759	7.12163	7.1382	7.1042	7.15232	6.69158	6.79266	6.52512	6.60386	6.63876	6.4957	6.59201	6.72474	6.74905	6.66594	6.73096	6.59662
ILMN_1658847	7.16073	7.18835	7.22762	7.26229	7.25796	7.31961	7.25796	7.26357	7.24039	7.33662	6.97376	6.77895	7.05703	6.88145	6.97334	7.14153	6.9063	7.48737	7.15383	6.87377	6.95124	7.63737
ILMN_1658853	7.18215	7.19579	7.14838	7.12074	7.06249	7.1446	7.18215	7.15174	7.1042	7.23584	6.69518	6.67084	6.66946	6.79005	6.71741	6.65237	6.72375	6.66226	6.68024	6.80086	6.71882	6.8841
ILMN_1658858	7.25313	7.33726	7.36582	7.34647	7.34183	7.21794	7.15232	7.32264	7.42803	7.17141	6.97979	6.75088	6.90824	6.84883	6.75286	6.85412	6.79529	6.73651	6.69677	6.76689	6.63516	6.85192
ILMN_1658861	7.13008	7.11444	7.13989	7.19579	7.19888	7.28789	7.12163	7.26357	7.16965	7.24861	6.73023	6.63139	6.75967	6.76171	6.93034	6.66488	6.77675	6.74905	6.69126	6.87693	6.73542	6.71154
ILMN_1658864	7.09753	7.11444	7.15746	7.1042	7.01894	7.17141	7.16257	7.1289	7.15344	7.13061	6.78986	6.7776	6.7497	6.79121	6.67697	6.80541	6.66063	6.78996	6.53848	6.74905	6.67877	6.75059
ILMN_1658868	7.18215	7.15232	7.13989	7.15098	7.1382	7.19888	7.12163	7.1289	7.13872	7.2042	6.73576	6.76171	6.86996	6.67094	6.65397	6.76669	6.74647	6.67924	6.70355	6.7197	6.84071	6.67909
ILMN_1658869	7.15292	7.15232	7.09154	7.06474	7.08876	7.21794	7.20347	7.03675	7.13008	7.22527	6.67595	6.71186	6.63259	6.60386	6.71352	6.74419	6.79165	6.7429	6.62822	6.71606	6.79747	6.83189
ILMN_1658874	7.08068	7.00578	7.09154	7.08192	7.16125	7.1804	7.03737	7.07099	7.11366	7.12163	6.67491	6.71661	6.65926	6.7324	6.65799	6.72762	6.69751	6.66522	6.65281	6.74063	6.59982	6.7416
ILMN_1658883	8.93972	8.63791	8.96984	8.73239	8.77192	9.13172	9.07608	9.17662	8.93607	9.00512	8.60439	9.61672	9.33086	8.37245	9.39891	9.10574	9.33938	9.18318	8.79919	8.40562	9.41146	8.55942
ILMN_1658884	7.47307	7.57605	7.53755	7.52521	7.52145	7.41207	7.57171	7.28257	7.55869	7.39106	7.16154	7.65752	7.2146	7.29136	7.31808	7.83821	7.24694	7.06018	7.21926	7.28875	7.29607	7.30532
ILMN_1658885	8.78606	8.8339	8.71904	8.80302	8.59754	8.8764	8.8037	9.25678	8.87009	8.64957	8.61847	9.22287	9.353	8.57537	9.50716	9.63835	9.59885	9.68291	9.18826	8.48681	9.40091	8.59753
ILMN_1658899	6.97138	7.1042	7.05129	7.13476	7.09529	7.16257	7.19299	7.08192	7.16965	7.14066	6.69886	6.7429	6.75702	6.7416	6.69529	6.66488	6.77915	6.68937	6.69529	6.69024	6.56955	6.63399
ILMN_1658902	7.67338	7.68577	7.87011	7.83394	7.95084	7.93256	7.96439	7.92445	7.78482	7.63752	7.7668	7.29896	7.65895	7.87279	7.28585	7.28335	7.48794	7.39997	7.40813	7.74132	7.42903	7.69401
ILMN_1658904	6.99048	7.16125	7.05129	7.1042	7.06249	7.08253	7.08068	7.11444	7.00726	7.17141	6.79664	6.80975	6.69945	6.75958	6.70821	6.68071	6.88498	6.85353	6.85592	6.83879	6.77915	7.01383
ILMN_1658905	7.1042	7.12436	7.10231	7.12074	7.1289	7.1289	7.16257	7.09337	7.1975	7.13061	6.78806	6.84357	6.63772	6.69518	6.80304	6.60417	6.67198	6.63405	6.5727	6.57749	6.60909	6.73371
ILMN_1658909	7.09031	7.22762	7.04304	7.1289	7.09529	7.11955	7.11291	7.11444	7.16965	7.16257	6.72333	6.74021	6.76945	6.63994	6.5228	6.59385	6.7586	6.76807	6.70842	6.63511	6.73542	6.61051
ILMN_1658911	8.67341	8.41236	8.82032	9.05577	8.64605	9.11278	8.7198	10.0243	8.80266	9.47898	8.51112	8.41527	8.25978	8.64243	9.39642	9.08149	8.69378	9.56977	9.10253	9.02724	8.94749	9.4917
ILMN_1658917	7.04582	7.0762	7.08192	7.03095	7.09529	7.06474	7.13061	7.09337	7.05266	7.01894	6.74528	6.58452	6.65534	6.76053	6.75776	6.76009	6.87085	6.76936	6.67595	6.73446	6.58283	6.60479
ILMN_1658920	7.06249	7.0762	7.11222	7.2193	7.24582	7.1804	7.10231	7.02528	7.11366	7.22527	6.71154	6.65458	6.81456	6.73802	6.68879	6.65799	6.57872	6.61752	6.69126	6.73346	6.73371	6.7429
ILMN_1658925	7.03737	7.11444	7.10231	7.038	7.12074	7.10291	7.00642	7.15174	7.06122	6.96826	6.78168	6.67575	6.83493	6.8595	6.69529	6.71519	6.72293	6.71439	6.84501	6.63772	6.66543	6.58729
ILMN_1658926	7.02736	7.0168	7.09154	6.98912	7.12074	7.04793	6.99577	7.15174	7.07988	7.09154	6.68418	6.93097	6.83736	6.79005	6.68071	6.71086	6.70089	6.68044	6.67595	6.64646	6.61276	6.66558
ILMN_1658928	7.96763	7.88009	8.44252	8.09526	8.38591	9.00577	8.33339	8.73468	8.04542	8.78768	9.14653	8.72908	8.66096	8.90701	9.22062	9.52676	8.43502	8.83636	9.12662	9.41226	8.9105	9.90786
ILMN_1658937	7.05493	7.12436	7.12074	7.18952	7.17642	7.10291	7.12163	7.26357	7.07988	7.14066	6.69518	6.79266	6.82274	6.72978	6.79588	6.77315	6.66063	6.77063	6.78756	6.70222	6.81731	6.6856
ILMN_1658938	7.12163	7.04731	7.07224	7.12074	7.1289	7.11955	7.04793	7.1042	7.13008	7.08192	6.70704	6.67084	6.68879	6.69158	6.59191	6.66341	6.73479	6.70443	6.67741	6.56221	6.68664	6.82112
ILMN_1658940	7.15292	7.0857	7.13989	7.16257	7.07099	7.04793	7.15232	7.04731	7.12163	7.13061	6.88199	6.94312	6.72605	6.89348	6.72111	6.87105	6.7859	6.80879	6.74388	6.81497	6.97979	6.7399
ILMN_1658942	7.17383	7.06611	7.09154	7.05656	7.12074	7.10291	7.15232	7.1289	7.17642	7.12163	6.6424	6.60083	6.70577	6.69895	6.67575	6.6889	6.61678	6.76936	6.62002	6.60609	6.64356	6.6307
ILMN_1658945	7.1382	7.0857	7.12074	7.12074	7.08876	7.11955	7.22527	7.22877	7.22364	7.17141	6.70222	6.77305	6.88498	6.75402	6.73401	6.93313	6.7859	6.87823	6.75048	6.72485	6.72781	6.75059
ILMN_1658950	8.18932	8.727	8.25454	8.37486	8.17171	8.76246	8.22789	8.78789	8.24198	8.7419	8.05512	7.9446	8.09788	7.92751	8.46678	8.43984	7.9349	8.67916	8.18831	7.98092	8.28515	8.74861
ILMN_1658951	7.32015	7.22762	7.2116	7.18215	7.09529	7.28789	7.13061	7.28257	7.26406	7.10291	6.96764	7.03117	7.08548	6.90058	6.95309	6.97611	6.83969	6.99887	6.96788	6.86553	6.79279	7.04841
ILMN_1658955	7.09753	7.0762	7.04304	7.08956	7.06249	7.13759	7.17273	7.08192	7.07099	7.2135	6.80955	6.6991	6.79111	6.67094	6.73662	6.76533	6.84501	6.68166	6.69126	6.68394	6.82947	6.93482
ILMN_1658957	7.30676	7.28103	7.53119	7.33334	7.28375	7.27801	7.36704	7.26357	7.24685	7.40157	7.15486	7.23784	6.95011	7.02857	7.04732	6.88741	6.89742	7.23033	7.02577	7.07531	6.96506	7.36217
ILMN_1658962	7.65294	7.55936	7.58035	7.58741	7.61288	7.76614	7.64972	7.67481	7.55105	7.76095	7.63477	7.45765	7.51383	7.42443	8.14916	8.3139	7.70496	7.7225	7.62636	7.48168	7.71416	7.79042
ILMN_1658964	7.16073	7.13293	7.07224	7.15431	7.12074	7.15344	7.18215	7.11444	7.13872	7.2135	6.65034	6.65799	6.64272	6.67887	6.65523	6.62356	6.61573	6.72605	6.71519	6.61536	6.68361	6.66915
ILMN_1658965	7.03737	7.14313	7.09154	7.09529	7.06249	7.04793	7.08068	7.02528	7.06122	7.11291	6.7416	6.77432	6.65799	6.60285	6.76797	6.73204	6.72293	6.67187	6.70478	6.56072	6.65039	6.69231
ILMN_1658972	7.09031	7.1042	7.06249	7.06474	7.12074	7.07347	7.15232	7.20005	7.14512	7.10291	6.75752	6.74776	6.77778	6.74776	6.85502	6.71254	6.71672	6.75048	6.84733	6.73446	6.82194	6.81407
ILMN_1658978	7.17383	7.18835	7.25313	7.15098	7.23982	7.11222	7.28789	7.15174	7.1975	7.15232	6.75414	6.68568	6.76308	6.79569	6.79712	6.77188	6.85353	6.83857	6.9819	6.82264	6.78052	6.59872
ILMN_1658983	7.1042	7.1042	7.11222	7.11291	7.09529	7.13759	7.08068	7.05986	7.05266	7.15232	6.64563	6.64305	6.7619	6.72364	6.668	6.697	6.68206	6.64178	6.61005	6.76242	6.80446	6.60873
ILMN_1658986	7.21211	7.0268	7.17383	7.11291	7.08876	7.10291	6.98337	7.05986	7.13008	7.14066	6.76669	6.7586	6.81107	6.74658	6.75034	6.78294	6.7405	6.70066	6.8021	6.81037	6.72343	6.78986
ILMN_1658989	7.19385	7.04731	6.98085	7.00726	7.15344	7.03737	7.14254	7.02528	6.9704	7.09154	6.80655	6.8418	6.76435	6.82009	6.69014	6.73605	6.81058	6.7429	6.86038	6.75414	6.85997	6.74776
ILMN_1658992	9.28746	9.30987	8.94261	9.31437	8.93972	9.21115	9.01112	9.47972	9.01034	9.40314	8.23894	8.26	8.14576	8.70876	8.94713	8.65379	8.47088	8.90847	8.93897	8.71188	8.72105	9.03731
ILMN_1658995	8.69832	8.48873	8.71904	8.68448	8.22413	8.32311	8.23657	8.75565	8.30031	8.32874	8.39245	7.96717	8.29947	8.68073	8.69378	8.61604	8.45793	8.07015	8.78804	8.43984	8.59904	8.64137
ILMN_1659000	7.1042	7.13293	7.13989	7.11291	7.1446	7.1289	7.14254	7.05986	7.08956	7.03871	6.86157	6.71186	6.7497	6.79569	6.72892	6.72902	6.7429	6.64993	6.7553	6.74548	6.84621	6.66008
ILMN_1659006	7.17383	7.11444	7.06249	7.038	7.00077	7.10291	7.03737	7.03675	6.95782	7.09154	6.56737	6.59325	6.58938	6.52674	6.58515	6.54958	6.60777	6.67051	6.59795	6.6129	6.74776	6.79847
ILMN_1659010	7.11366	7.16965	7.16498	7.12074	7.1289	7.08253	7.13061	7.07099	7.13872	7.16257	6.78483	6.7198	6.7583	6.69261	6.78168	6.7616	6.80935	6.76171	6.72616	6.68652	6.69271	6.70211
ILMN_1659013	7.18215	7.16125	7.11222	7.11291	7.08876	7.09276	7.10231	7.17383	7.11366	7.11291	6.75295	6.71054	6.59167	6.71044	6.64993	6.81967	6.61573	6.81478	6.79496	6.7071	6.78052	6.65824
ILMN_1659017	8.12935	8.28473	8.30872	8.47109	8.25751	7.7948	8.33339	7.95134	8.06661	8.08789	8.40668	8.05484	7.9763	8.30055	7.57405	7.38968	8.25355	8.04528	8.24772	8.46703	8.07335	7.65935
ILMN_1659023	7.09753	7.15232	7.14838	7.19579	7.19888	7.20684	7.13061	7.17383	7.14512	7.13061	6.74892	6.7416	6.784	6.71991	6.67198	6.59818	6.52856	6.7311	6.66226	6.75414	6.74776	6.67731
ILMN_1659024	7.1382	6.98544	7.2116	7.27602	7.02736	7.10291	7.05986	7.05986	7.15344	7.33662	6.91503	6.77129	6.70577	6.75624	6.7883	6.86553	6.72485	6.87049	6.7887	6.82377	6.70089	6.82264
ILMN_1659026	7.25796	7.17898	7.09154	7.15431	7.05493	7.23667	7.12163	7.46935	7.17642	7.2983	6.74419	6.67731	6.69014	6.82203	7.0218	7.09065	6.9566	6.97975	6.8021	6.81917	6.87377	6.91904
ILMN_1659027	7.25313	7.20471	7.27849	7.09529	7.26406	7.99246	7.22527	7.50255	7.21794	7.5493	6.98808	6.84645	6.99062	6.97611	8.66282	7.4301	7.55449	7.4891	7.75675	7.30936	7.78085	7.4343
ILMN_1659028	7.08068	7.00578	7.04304	7.08192	7.05493	7.17141	7.00642	7.15174	7.07099	7.12163	6.70222	6.76171	6.59818	6.68372	6.70942	6.69564	6.5655	6.76171	6.66662	6.76242	6.78367	6.7196
ILMN_1659029	8.82703	8.32181	8.91404	8.58105	8.83777	8.92581	8.85046	9.35096	9.02964	8.82032	8.78875	9.06304	9.05578	8.85146	8.48029	8.91607	9.37646	9.16207	8.15798	8.9537	9.05923	8.70037
ILMN_1659038	7.1446	7.12436	7.05129	7.16257	7.1042	7.01894	7.02736	7.11444	7.06122	7.10291	6.75197	6.76009	6.57872	6.59872	6.64993	6.79121	6.72045	6.70821	6.7401	6.64178	6.81731	6.72443
ILMN_1659047	10.8659	9.24008	9.77482	10.7251	9.8947	9.84486	9.51076	10.2111	9.80768	9.25337	11.5363	8.71051	9.92657	9.7543	8.19958	8.68905	8.40512	8.7374	8.46322	9.19081	8.49679	10.6212
ILMN_1659052	7.13008	7.13293	7.16498	7.02373	7.1042	7.20684	7.14254	7.1289	7.11366	7.09154	6.70089	6.72474	6.558	6.7324	6.82947	6.73741	6.64519	6.86376	6.71793	6.65936	6.91455	6.79847
ILMN_1659054	8.29679	8.56728	8.64705	8.42682	8.72567	8.76747	8.71552	8.55112	8.41488	8.60544	8.94933	8.46432	8.52238	8.96107	7.46355	7.74462	8.46432	8.36609	8.48843	8.04438	8.39098	7.92649
ILMN_1659058	7.64233	7.88009	7.47945	7.4998	7.33662	7.15344	7.33868	7.05986	7.42314	7.07224	7.17169	7.12018	7.2792	7.5264	6.93604	6.88312	6.8793	6.7938	6.74647	7.07009	6.9387	6.9889
ILMN_1659063	7.08068	7.06611	7.09154	7.06474	7.05493	7.09276	7.11291	7.11444	7.11366	7.03871	6.68071	6.59891	6.69261	6.66842	6.7324	6.72762	6.70454	6.88974	6.7376	6.75414	6.83756	6.67387
ILMN_1659072	7.02736	7.03737	6.99048	7.02373	7.08876	6.98085	7.03737	7.07099	7.07988	7.18215	6.63984	6.79404	6.64535	6.67617	6.67947	6.58515	6.69886	6.64613	6.58561	6.71606	6.69158	6.80975
ILMN_1659075	7.91479	8.66493	8.1105	7.59405	8.27462	8.30788	8.55991	7.98098	8.21376	8.20686	8.1631	7.37787	7.99339	8.2249	8.02813	7.30833	8.24846	7.46936	8.30976	7.77527	8.84969	7.77862
ILMN_1659077	7.09031	7.0762	7.19138	7.07224	7.15344	7.09276	7.08068	7.1042	7.21211	7.14066	6.7587	6.70078	6.68507	6.65304	6.84923	6.6861	6.72045	6.62517	6.72212	6.76955	6.81305	6.70211
ILMN_1659079	7.03737	7.05656	7.10231	6.98912	7.06249	7.03737	7.03737	7.09337	7.03531	6.94585	6.75977	6.75553	6.67084	6.84319	6.69663	6.69024	6.86808	6.8332	6.64305	6.72222	6.61431	6.66915
ILMN_1659082	7.28583	7.31409	7.23522	7.40422	7.2135	7.16257	7.22527	7.09337	7.25796	7.18215	6.94816	6.95141	6.94294	6.90746	6.88916	6.93874	6.8793	6.91647	6.90174	6.93172	6.78986	6.80304
ILMN_1659085	7.12163	7.15232	7.06249	7.04793	6.99048	6.96389	7.07018	7.15174	7.08956	7.13061	6.66063	6.84824	6.69843	6.70642	6.7938	6.75463	6.69024	6.64473	6.67356	6.74063	6.68361	6.8487
ILMN_1659086	7.16073	7.12436	7.06249	7.14254	7.05493	7.16257	7.05986	7.20005	7.1042	7.15232	6.79215	6.79121	6.75444	6.74919	6.75658	6.97203	6.83211	6.87978	6.85592	6.83667	6.94929	6.79995
ILMN_1659095	13.518	13.628	13.5103	13.4961	13.5706	13.338	13.689	13.4428	13.5911	13.3643	13.476	13.4517	13.6233	13.5982	13.6863	13.0441	13.6181	13.6544	13.806	13.5721	13.5543	13.5903
ILMN_1659099	7.52421	7.36582	7.37216	7.393	7.32482	7.1289	7.47002	7.08192	7.3295	7.009	6.89218	6.84513	6.79881	6.78358	6.83067	6.69158	6.77315	6.66226	6.63399	6.80398	6.69014	6.72243
ILMN_1659103	7.07224	7.09467	7.07224	7.11291	7.05493	7.1289	7.04793	7.11444	7.02617	7.07224	6.76955	6.6991	6.87236	6.72892	6.6448	6.78158	6.76552	6.65809	6.61752	6.79529	6.68044	6.8382
ILMN_1659106	7.06249	7.05656	7.17383	7.08192	7.08876	7.0109	7.13061	7.1382	7.07099	7.19299	6.68206	6.71186	6.72111	6.73576	6.67072	6.7208	6.72892	6.70211	6.72212	6.66594	6.92234	6.71489
ILMN_1659110	7.37027	7.263	7.25313	7.20684	7.07099	7.19888	7.12163	7.11444	7.13872	7.07224	6.76955	6.87518	6.78628	6.82009	6.97636	6.66488	6.61678	6.69576	6.75156	6.71606	6.76837	6.6889
ILMN_1659122	7.35009	7.26903	7.45378	7.40983	7.41207	7.40368	7.52841	8.33551	7.48189	7.68728	7.12753	7.73851	7.14307	7.15527	8.06218	7.73496	8.03852	8.75478	7.78858	7.71482	8.15837	8.1667
ILMN_1659138	7.09753	7.18835	7.10231	7.1042	7.09529	7.1446	7.09031	7.03675	7.07988	7.18215	6.65534	6.74776	6.63387	6.65556	6.73123	6.69271	6.73836	6.68166	6.7376	6.64646	6.5323	6.61231
ILMN_1659142	7.09031	7.05656	7.06249	7.05656	7.04582	7.06474	7.11291	6.97808	7.08956	7.05001	6.78691	6.66099	6.64902	6.71882	6.73123	6.70942	6.69886	6.77778	6.69014	6.78986	6.72781	6.66915
ILMN_1659148	7.24685	7.16965	7.12074	7.19579	7.06249	7.09276	7.02736	7.03675	7.16965	7.13061	6.74991	6.96756	6.87458	6.75402	6.96792	6.7493	6.69886	6.78806	6.7887	6.88371	6.81305	6.7738
ILMN_1659150	7.11366	7.16125	7.10231	7.08192	7.04582	7.13759	7.03737	7.11444	7.16965	7.05001	6.66683	6.65137	6.7416	6.59468	6.91847	6.61916	6.55954	6.67051	6.7324	6.56072	6.67062	6.662
ILMN_1659156	7.32015	7.44407	7.30823	7.32015	7.29582	7.1804	7.28789	7.18634	7.24685	7.13061	7.11668	7.00404	7.18798	7.00172	6.78966	6.81128	7.17422	6.75048	6.92374	6.94052	6.96077	6.8726
ILMN_1659158	7.15292	7.17898	7.11222	7.15098	7.18215	7.15344	7.05986	7.04731	7.09674	7.01894	6.77315	6.58452	6.7165	6.60764	6.55233	6.64272	6.72167	6.7197	6.70211	6.59519	6.80758	6.57955
ILMN_1659166	7.05493	7.12436	7.10231	7.12074	7.1042	7.16257	7.10231	7.1382	7.13872	7.14066	6.70454	6.71186	6.79778	6.83394	6.63984	6.7401	6.85353	6.74528	6.71396	6.72353	6.68664	6.72243
ILMN_1659169	7.00822	7.0762	7.11222	7.12074	7.08876	7.13759	7.10231	7.02528	7.05266	7.10291	6.57638	6.7071	6.66705	6.6889	6.75142	6.52542	6.67595	6.61431	6.59628	6.62323	6.73371	6.52626
ILMN_1659189	8.96785	8.99977	9.58879	9.46627	9.64221	11.9965	9.92502	11.7916	9.39567	11.7188	10.2753	9.99328	10.0509	10.1075	12.1597	11.8344	9.97869	11.6037	11.1373	10.6769	11.2178	12.3468
ILMN_1659199	7.02736	7.04731	7.13989	7.08956	7.04582	7.11955	7.14254	7.18634	7.16184	7.08192	6.72212	6.77432	6.67084	6.79569	6.7616	6.80407	6.71427	6.76669	6.62822	6.80517	6.76415	6.62886
ILMN_1659202	7.1446	7.09467	7.15746	7.06474	7.09529	7.15344	7.13061	7.22877	7.22364	7.15232	6.70577	6.64634	6.90824	6.85181	6.76426	6.80407	6.81058	6.69576	6.73123	6.8412	6.61431	6.6723
ILMN_1659206	11.4226	11.7216	11.3221	11.2835	10.966	11.4025	11.2106	11.2428	11.1449	11.217	12.0954	11.8344	11.6531	11.8673	11.9674	12.2834	11.3248	11.4466	11.3081	11.3462	11.3714	11.3714
ILMN_1659207	7.11366	7.0268	7.13989	7.1289	7.05493	7.13759	7.10231	7.17383	7.2294	7.13061	6.83676	6.63506	6.76552	6.85004	6.8438	6.62822	6.68071	6.82225	6.74776	6.72222	6.83756	6.57771
ILMN_1659209	7.18215	7.15232	7.13989	7.17642	7.15344	7.10291	7.14254	7.11444	7.18215	7.15232	6.65534	6.65458	6.73802	6.66946	6.5866	6.79121	6.76905	6.79871	6.7401	6.66089	6.74776	6.7196
ILMN_1659214	7.09753	7.05656	7.08192	7.09529	7.1042	7.1289	7.18215	7.15174	6.98011	7.08192	6.78986	6.88732	6.80758	6.68765	6.71209	6.79279	6.89265	6.75669	6.72892	6.67251	6.79279	6.69024
ILMN_1659215	7.19385	7.09467	7.09154	7.04793	7.1446	7.16257	7.11291	7.1289	7.15344	7.14066	6.71376	6.71661	6.73521	6.73446	6.57346	6.73491	6.7512	6.74647	6.63538	6.71489	6.92981	6.72243
ILMN_1659224	6.96086	7.13293	7.13008	7.06474	7.09529	7.11955	7.09031	7.1042	7.01607	7.07224	6.77082	6.68568	6.6722	6.55416	6.73555	6.53369	6.662	6.70066	6.68024	6.82491	6.60539	6.56955
ILMN_1659227	7.16819	7.263	7.2116	7.1289	7.26903	7.96439	7.16257	7.67481	7.25313	7.19299	6.8567	6.97347	6.7619	7.11224	7.0747	6.96279	6.9566	7.07186	7.28239	7.47275	6.85074	7.08107
ILMN_1659230	7.15292	7.0762	7.02231	7.13476	7.08876	7.1289	7.13061	7.09337	7.09674	7.14066	6.67731	6.70566	6.66385	6.75624	6.58393	6.78851	6.662	6.72474	6.74388	6.69158	6.80614	6.81987
ILMN_1659240	10.5314	10.6438	10.42	10.6071	10.6969	11.0632	10.9257	11.4048	10.8161	11.1391	10.7708	11.3042	11.5024	10.8465	11.2406	11.2117	11.2042	11.4859	11.117	10.665	11.0191	11.328
ILMN_1659253	7.06249	7.12436	6.98085	7.04793	6.95626	7.05656	7.15232	7.11444	7.07988	7.05001	6.57125	6.62979	6.47786	6.64658	6.52652	6.55686	6.5655	6.56403	6.63726	6.60609	6.61775	6.66008
ILMN_1659255	9.52757	8.81757	9.16475	9.31763	8.55216	8.70352	8.60589	9.69277	8.78052	8.70706	8.93541	9.07006	8.86476	8.89148	9.11268	9.28657	9.03122	9.48348	9.21564	8.92091	8.99435	8.93926
ILMN_1659257	7.80909	8.0588	7.84098	7.75506	7.71656	7.23667	7.49771	7.1289	7.76095	7.2135	7.7169	7.39126	7.62653	7.87057	7.662	7.18828	7.40309	6.96279	7.26933	7.21012	7.63979	7.49112
ILMN_1659259	7.24039	7.20471	7.13008	7.19579	7.20528	7.01894	7.16257	7.07099	7.11366	7.08192	6.9409	6.93097	7.043	6.96366	7.00344	6.90566	6.94416	6.95309	6.99458	6.87377	6.93303	7.18709
ILMN_1659265	7.09031	7.0168	7.06249	7.1042	7.07099	7.15344	7.07018	7.02528	7.13008	7.08192	6.64113	6.8318	6.65672	6.54273	6.66695	6.97385	6.72375	6.65418	6.81024	6.59047	6.81305	6.76797
ILMN_1659270	7.1042	7.00578	7.13989	7.16257	7.2135	7.11955	7.2135	7.1382	7.2042	7.15232	6.83857	6.84513	6.89537	6.78128	6.9066	6.84713	6.70699	6.87162	6.94239	6.86376	6.71882	6.71641
ILMN_1659273	7.35009	7.6495	7.48983	7.41207	7.57069	7.48731	7.31823	7.1289	7.45315	7.55869	6.97376	6.91468	6.95382	6.88331	6.80923	6.91158	7.06991	6.91131	6.94043	7.01907	6.91913	6.77992
ILMN_1659285	7.862	7.70903	7.66513	7.64995	7.71656	7.89934	7.65855	7.66054	7.62582	7.89226	7.04394	6.97347	7.05609	7.0939	7.04732	6.8154	6.82875	7.00194	7.07475	6.97754	7.34221	7.41182
ILMN_1659290	7.28583	7.11444	7.09154	7.06474	7.22706	7.08253	7.12163	7.04731	7.06122	7.05001	6.67138	6.82051	6.87541	6.63876	6.65397	6.81384	6.71427	6.73371	6.86936	6.66089	6.83475	6.76171
ILMN_1659297	7.19385	7.0857	7.12074	7.15098	7.1289	7.09276	7.04793	7.05986	7.1042	7.14066	6.69518	6.78358	6.75224	6.80313	6.88	6.69024	6.65304	6.71559	6.72892	6.75414	6.62517	6.71793
ILMN_1659306	7.1042	7.11444	7.08192	7.08192	7.2135	7.16257	7.12163	7.02528	7.12163	7.13061	6.71824	6.77432	6.7608	6.73911	6.89052	6.72212	6.67595	6.72715	6.84861	6.58503	6.80758	6.70689
ILMN_1659312	7.16073	7.0857	7.06249	7.08956	7.09529	7.1446	7.09031	7.1042	7.07099	7.11291	7.04936	6.90192	6.85255	6.82977	6.94993	6.83597	6.88392	6.85106	6.87033	6.72353	6.81891	6.76448
ILMN_1659316	7.19385	7.1042	7.18215	7.038	7.18215	7.23667	7.15232	7.07099	7.13008	7.05001	6.70222	6.80313	6.85373	6.78909	6.78168	6.7401	6.67595	6.81003	6.68024	6.73696	6.71254	6.7399
ILMN_1659318	7.12163	7.09467	7.02231	7.04793	7.1042	7.11222	7.03737	7.11444	7.07099	7.14066	6.72781	6.7776	6.65418	6.82203	6.65672	6.70821	6.63888	6.63269	6.69677	6.72222	6.50294	6.86218
ILMN_1659327	7.02736	7.0168	7.14838	7.11291	7.1042	7.05656	7.03737	7.09337	6.99798	7.14066	6.63516	6.6094	6.65799	6.69024	6.62908	6.68071	6.662	6.57469	6.61871	6.60331	6.59444	6.70689
ILMN_1659333	7.09031	7.16125	7.11222	7.15098	7.03737	7.11222	7.09031	7.11444	7.13008	7.03871	6.77082	6.76955	6.87339	6.70642	6.76298	6.95975	6.81977	6.7324	6.71793	6.70965	6.78221	6.89505
ILMN_1659339	7.58741	7.52025	7.47338	7.59793	7.54148	7.19888	7.53676	7.04731	7.4395	7.12163	7.37623	7.40257	7.17169	7.47201	6.89742	6.7775	7.24694	6.86249	7.05039	7.26496	6.93716	6.85789
ILMN_1659343	10.3559	10.678	10.7912	10.5025	11.0519	10.9455	10.5882	10.5646	10.4187	10.8502	10.7139	10.4322	10.4805	10.5875	10.4738	11.1883	10.7865	10.5974	10.7893	10.798	10.9459	10.2706
ILMN_1659346	7.02736	7.0168	7.10231	7.04793	7.07099	7.02807	7.01743	7.04731	7.08956	7.12163	6.60583	6.60083	6.63387	6.62859	6.81299	6.79424	6.79082	6.67438	6.56527	6.77432	6.6979	6.66558
ILMN_1659350	7.19385	7.0762	7.11222	7.20684	7.16125	6.97138	7.10231	7.04731	7.19024	7.07224	6.76094	6.80655	6.81335	6.85004	6.76542	6.7416	6.64817	6.78032	6.7324	6.88009	6.662	6.72092
ILMN_1659352	7.34062	7.26903	7.23522	7.25082	7.26903	7.06474	7.22527	7.1382	7.29221	7.07224	7.05848	6.96322	7.05161	7.20634	6.87536	6.75197	6.92498	6.76669	6.88382	6.80398	6.75367	6.76637
ILMN_1659354	7.1042	7.03737	7.13008	7.18215	7.08068	7.05656	7.07018	7.16257	7.06122	7.2135	6.86157	6.70078	6.78158	6.8945	6.72892	6.66063	6.75248	6.9677	6.64305	6.71489	6.90985	6.69564
ILMN_1659359	7.03737	7.03737	7.06249	7.20171	7.03737	7.13759	7.02736	7.09337	7.04526	7.01894	6.72333	6.81147	6.73901	6.67757	6.63598	6.76797	6.60909	6.67697	6.66385	6.72222	6.77778	6.68059
ILMN_1659364	7.62582	7.60659	7.53755	7.51454	7.64629	7.46409	7.47899	7.24582	7.63752	7.48756	7.35365	7.44002	7.31808	7.39924	7.15535	7.08807	7.38425	7.2723	7.17223	7.24015	7.20259	7.2349
ILMN_1659365	7.59793	7.73459	7.40368	7.90627	7.78056	7.3087	8.29657	7.46935	7.34062	7.36005	6.84621	6.83844	6.80159	6.98557	6.70942	6.80541	6.6642	6.84612	6.84612	7.14745	7.08848	7.01271
ILMN_1659370	7.06249	7.03737	7.13008	7.16257	7.19888	7.1289	7.09031	7.05986	7.12163	7.11291	6.70355	6.82051	6.65799	6.68636	6.67198	6.78705	6.65074	6.63405	6.65142	6.65534	6.68361	6.70689
ILMN_1659371	7.19385	7.17898	7.00141	7.2193	7.1042	7.05656	7.13061	7.11444	7.08956	7.17141	6.94756	6.73555	6.87663	6.7416	6.89884	6.93735	6.82651	6.86108	6.75259	6.83767	6.78545	6.93695
ILMN_1659378	7.13008	7.11444	7.05129	7.04793	7.07099	6.96389	7.04793	7.03675	7.07988	7.01894	6.69518	6.63984	6.74776	6.82009	6.88762	6.84152	6.69751	6.80879	6.77178	6.74419	6.80879	6.6856
ILMN_1659389	7.05493	7.0762	7.01218	7.06474	7.15344	7.06474	7.18215	7.1042	7.12163	7.13061	6.70089	6.62143	6.67989	6.83189	7.02996	6.74419	6.80798	6.78555	6.81864	6.64178	6.65039	6.78264
ILMN_1659395	7.13008	7.18835	7.13008	7.20171	7.1042	7.07347	7.07018	7.26357	7.2042	7.11291	6.7859	6.84513	6.74776	6.75516	6.66936	6.7616	6.65188	6.76669	6.94915	6.78483	6.73371	6.77213
ILMN_1659401	7.16819	7.11444	7.03236	7.13476	7.06249	7.09276	7.13061	7.07099	7.04526	7.24861	6.75977	6.69036	6.74031	6.76053	6.77915	6.71254	6.64923	6.80879	6.59628	6.74419	6.80758	6.79404
ILMN_1659405	9.66422	9.32319	9.96864	9.58879	10.1643	9.89195	9.41123	9.45083	9.53314	9.88486	8.0271	7.20532	7.35011	7.95752	7.97526	7.2782	7.31808	7.77862	7.90738	8.25696	7.70778	8.01605
ILMN_1659411	8.94381	8.959	9.58303	9.28244	9.51576	10.0554	9.66556	10.0529	9.10936	10.0217	9.11846	9.04385	8.87979	8.699	9.43362	9.26018	9.06852	9.34413	9.33332	9.04262	9.36368	9.52637
ILMN_1659415	9.6001	9.11436	9.39118	9.72156	9.13645	8.79566	8.9369	8.58305	9.09194	9.04379	8.99919	8.26184	8.26433	9.06403	9.28516	8.56172	8.59154	8.40604	8.47051	9.01067	8.89986	8.87813
ILMN_1659421	7.07224	7.09467	7.18215	7.03095	7.05493	7.07347	7.10231	7.1382	7.07988	7.05001	6.73576	6.77129	6.7165	6.68765	6.68496	6.84301	6.63656	6.62664	6.7416	6.73446	6.65926	6.64305
ILMN_1659426	7.09031	6.99577	7.08192	7.16257	7.2135	7.1446	7.15232	7.1382	7.17642	7.16257	6.74419	6.83667	6.81589	6.83857	6.74776	6.73741	6.75034	6.85205	6.85163	6.70965	6.75958	6.72243
ILMN_1659430	7.11366	7.12436	7.19138	7.17642	7.12074	7.25796	7.17273	7.2135	7.16184	7.2135	6.81058	6.77305	6.68372	6.81795	6.80189	6.6722	6.79871	6.7949	6.69677	6.79986	6.66915	6.7868
ILMN_1659432	7.08068	6.99577	7.10231	7.15431	7.08068	7.10291	7.08068	7.1042	7.08956	7.07224	6.63516	6.6991	6.68507	6.71154	6.62908	6.59105	6.7324	6.72092	6.84071	6.68652	6.75958	7.00943
ILMN_1659437	10.4602	10.3899	10.3774	10.3475	10.5025	10.2122	10.1997	9.59712	10.3752	10.2396	8.96489	8.69513	8.99693	9.10845	8.45334	8.83724	8.77151	8.63449	8.83195	9.27251	9.23955	8.53537
ILMN_1659443	7.03737	7.00578	7.08192	7.13476	7.06249	7.1289	7.11291	7.05986	7.02617	7.09154	6.53484	6.67893	6.58938	6.58538	6.54234	6.65523	6.62215	6.68166	6.64154	6.66594	6.60142	6.54267
ILMN_1659444	7.16819	7.18835	7.20062	7.15431	7.16125	7.13759	7.08068	7.22877	7.07988	7.12163	6.80313	6.77129	6.81712	6.76053	6.76426	6.66778	6.87085	6.85481	6.90755	6.77546	6.83605	6.74605
ILMN_1659452	7.16819	7.1042	7.13989	7.14254	7.08068	7.07347	7.10231	7.20005	7.17642	7.16257	6.8567	6.74919	6.76945	6.75624	6.77315	6.71925	6.8555	6.70699	6.81511	6.67523	6.7913	6.73521
ILMN_1659462	9.90215	10.2653	10.2135	9.95192	10.1006	9.71928	10.1832	9.98206	10.1547	9.92648	10.0036	9.83303	9.98724	9.80978	8.4345	9.64896	10.1748	9.63835	10.0752	10.1681	10.0822	8.91023
ILMN_1659463	10.2257	10.1616	9.72199	10.1169	9.48347	7.82813	9.70082	8.31701	10.2873	8.17171	8.44889	7.91303	7.91554	8.41362	7.13041	6.93151	8.15798	6.88218	7.43156	8.13369	7.45336	7.47752
ILMN_1659464	7.07224	7.1042	7.10231	6.98085	7.1382	7.13759	7.05986	7.07099	7.13008	6.98847	6.58643	6.61775	6.60539	6.62497	6.67947	6.50278	6.59575	6.74905	6.50278	6.51721	6.69271	6.60873
ILMN_1659470	7.3806	7.27602	7.19138	7.32783	7.22706	7.20684	7.23522	7.1382	7.27602	7.13061	6.91006	6.8332	6.98484	6.82875	6.74905	6.86139	6.95224	6.82225	6.81511	6.82714	6.89701	6.81835
ILMN_1659475	7.00822	7.09467	7.09154	7.08956	7.17642	7.06474	7.11291	7.05986	7.00726	7.05001	6.7429	6.75248	6.75224	6.66477	6.7883	6.63984	6.74419	6.72857	6.79601	6.79747	6.73371	6.84291
ILMN_1659484	7.03737	7.18835	7.07224	7.1289	7.1446	7.08253	7.08068	7.02528	7.01607	7.09154	6.89218	6.72147	6.73263	6.89245	6.93034	6.7775	6.84501	6.70066	6.72353	6.68765	6.83605	6.89982
ILMN_1659488	7.16073	7.15232	7.19138	7.13476	7.15344	7.13759	7.20347	7.22877	7.21211	7.17141	6.74528	6.75248	6.7583	6.67887	6.79111	6.7587	6.78264	6.74528	6.84733	7.09323	6.69271	6.8487
ILMN_1659490	7.24039	7.41207	7.49821	7.26903	7.63704	7.57945	8.01889	7.07099	8.06053	7.28643	7.13323	7.22575	7.55714	7.19355	7.4343	7.66876	7.48727	7.31711	7.27776	7.57791	7.3621	7.27609
ILMN_1659493	7.13008	7.12436	7.16498	7.09529	7.1382	7.19888	7.08068	7.1042	7.16965	7.11291	6.6226	6.63984	6.82875	6.65039	6.67575	6.64668	6.70699	6.67187	6.60539	6.75681	6.77315	6.61752
ILMN_1659495	7.04582	7.03737	7.07224	6.99798	7.17642	7.11955	7.14254	7.15174	7.15344	7.11291	6.61032	6.70566	6.78986	6.75402	6.72364	6.69997	6.69158	6.69061	6.78986	6.69158	6.74627	6.6889
ILMN_1659497	7.07224	7.16125	7.12074	7.08192	7.18215	7.08253	7.10231	7.38115	7.01607	7.009	6.7252	6.92498	6.76669	6.70019	6.80407	6.7587	6.69405	6.7324	6.72485	6.66594	6.71741	6.8382
ILMN_1659508	7.08068	7.16125	7.07224	7.03095	7.1042	7.13759	7.11291	7.03675	7.13872	7.07224	6.8409	6.80502	6.72004	6.70131	6.76925	6.69271	6.72616	6.7311	6.67072	6.61536	6.64356	6.60659
ILMN_1659511	7.07224	7.11444	7.06249	7.11291	7.16125	7.04793	7.16257	7.17383	7.13872	7.17141	6.75295	6.81283	6.73901	6.74919	7.00178	6.72343	6.55251	6.69453	6.76053	6.83221	6.7324	7.1099
ILMN_1659513	7.05493	7.16125	7.08192	7.12074	7.12074	7.02807	7.02736	7.1289	7.15344	7.10291	6.73706	6.79569	6.71528	6.67491	6.67575	6.77895	6.70089	6.90566	6.84963	6.69024	6.71075	6.74605
ILMN_1659517	7.16819	7.0857	7.16498	7.11291	7.23472	7.15344	7.15232	7.24582	7.11366	7.48023	6.82335	6.7385	6.79881	6.8567	6.79588	6.75463	6.79871	7.17746	6.84501	6.96371	6.81589	6.9636
ILMN_1659522	7.17383	7.12436	7.15746	7.12074	7.19888	7.11955	7.04793	7.15174	7.15344	7.2042	6.67853	6.7651	6.70832	6.67491	6.7405	6.89884	6.7405	6.75295	6.7938	6.68166	6.72485	6.80559
ILMN_1659523	8.79961	8.97227	8.84394	9.01143	8.98821	9.85494	9.24246	9.47972	8.91177	9.77548	8.68724	8.73833	8.84422	8.66965	9.75282	9.28593	9.02385	9.58082	9.15478	8.95102	9.32441	9.90206
ILMN_1659524	7.47307	7.59261	7.47945	7.58741	7.41838	7.47199	7.47002	7.45315	7.43463	7.60704	7.42647	6.90585	7.04069	7.27848	6.92374	7.27095	7.18485	7.11855	7.08626	7.35054	7.11818	7.27041
ILMN_1659536	7.25796	7.28789	7.19138	7.24685	7.3591	7.60659	7.35822	7.38115	7.30123	7.41164	6.73576	6.79871	6.83189	6.85493	6.78041	6.76669	6.67832	6.86249	6.88019	6.82491	6.79747	6.88136
ILMN_1659537	7.40157	7.53154	7.3806	7.55936	7.3639	7.13759	7.47899	7.34183	7.29776	7.2042	6.94911	7.07796	6.86896	7.08081	6.99534	7.04186	6.85771	6.88218	6.8292	6.88559	6.84904	6.9709
ILMN_1659541	7.02736	7.20471	7.24582	7.08956	7.15344	7.17141	7.16257	7.1382	7.12163	7.08192	6.7163	6.7651	6.77546	6.62733	6.7324	6.77602	6.70222	6.72353	6.75669	6.54509	6.70232	6.84559
ILMN_1659543	7.20528	7.0857	6.95684	7.04793	7.1446	7.05656	7.22527	7.03675	7.07099	7.14066	6.76212	6.74776	6.6973	6.83189	6.7616	6.68361	6.7429	6.58805	6.83969	6.71741	6.87377	6.67595
ILMN_1659544	8.42208	8.38849	8.25454	8.41344	8.21892	8.28104	8.39269	8.03042	8.20564	8.47478	8.31017	8.38134	8.168	8.37418	8.37881	8.4147	8.79003	8.19224	8.25145	8.67781	8.59332	8.04909
ILMN_1659550	10.8725	10.8491	10.8774	10.5242	10.204	10.2728	10.8016	11.1376	10.3665	10.6601	7.96184	7.61211	7.80061	8.10382	8.04449	7.98526	7.9069	8.38631	8.00772	7.74008	8.23152	7.96306
ILMN_1659553	7.32015	7.60659	7.57037	7.63752	7.72388	8.17455	7.57171	8.17915	7.67244	8.05314	6.88132	7.03858	7.05063	6.96911	7.04122	7.51452	6.84612	6.98837	7.01147	6.94388	6.89547	7.41864
ILMN_1659563	7.15292	7.12436	7.12074	7.07224	7.07099	7.22762	7.15232	7.08192	7.13872	7.17141	6.73023	6.61431	6.85502	6.69518	6.73123	6.92471	6.7608	6.76669	6.6818	6.80189	6.71254	6.7399
ILMN_1659564	10.4735	10.5847	10.7589	10.6341	10.7432	10.8799	10.9565	10.825	11.0205	10.7447	10.4419	11.0225	11.0054	9.99702	10.7719	10.3198	10.8959	11.1373	10.6699	10.4322	10.7778	10.783
ILMN_1659565	7.17383	7.03737	7.10231	7.04793	7.04582	7.02807	7.00642	7.1042	7.08956	7.07224	6.71154	6.79569	6.57625	6.63994	6.61871	6.66636	6.70089	6.76807	6.77778	6.6889	6.71882	6.66719
ILMN_1659572	6.97138	7.11444	7.03236	7.1289	7.07099	6.98085	7.18215	7.01218	7.1042	7.01894	6.60176	6.68394	6.62757	6.67887	6.57187	6.61051	6.64817	6.56403	6.58089	6.66742	6.5867	6.60479
ILMN_1659576	7.04582	7.0168	7.27849	7.18952	7.09529	6.97138	7.08068	7.08192	7.09674	7.06122	6.8841	6.69564	6.70345	6.70019	6.88136	6.78294	6.84914	6.77778	6.70842	6.70965	6.98408	6.61573
ILMN_1659583	7.16819	7.17898	7.26229	7.26903	7.1382	7.07347	7.20347	7.34183	7.15344	7.19299	6.89413	6.7429	6.72702	6.8578	6.73401	7.14023	6.72485	6.72212	6.74279	6.7636	6.63516	6.72902
ILMN_1659594	7.07224	7.0857	7.03236	7.07224	7.1382	7.11222	7.09031	7.07099	7.09674	7.06122	6.70222	6.63337	6.64144	6.67617	6.6301	6.9692	6.59201	6.70821	6.63726	6.69553	6.59818	6.639
ILMN_1659597	6.99048	7.09467	7.04304	7.03095	7.05493	7.10291	7.03737	7.11444	7.04526	7.02964	6.58029	6.64634	6.62002	6.54273	6.46548	6.70121	6.61431	6.6129	6.65936	6.46095	6.5892	6.69231
ILMN_1659599	7.08068	7.12436	7.03236	7.11291	7.08068	7.1289	7.11291	7.08192	7.1042	7.08192	6.84184	6.82569	6.69484	6.69618	6.79246	6.67062	6.78264	6.86108	6.83171	6.66216	6.76105	6.62133
ILMN_1659601	7.18215	7.16965	7.09154	7.17642	7.11291	7.15344	7.11291	7.1042	7.03531	7.03871	6.71264	6.67084	6.84612	6.69158	6.83969	6.7616	6.91158	6.76298	6.8292	6.75142	6.6979	6.662
ILMN_1659602	7.08068	7.03737	7.04304	7.07224	7.05493	7.04793	7.04793	7.08192	7.07099	7.10291	6.85024	6.70852	6.72791	6.55766	6.79952	6.83597	6.72747	6.78294	6.71133	6.66742	6.69618	6.75402
ILMN_1659610	7.13008	7.09467	7.07224	7.08192	7.06249	7.10291	7.12163	7.1042	7.05266	7.15232	6.81589	6.90021	6.77895	6.45282	6.75034	6.6204	6.69405	6.69453	6.81511	6.61927	6.69014	6.64305
ILMN_1659620	7.24039	7.22762	7.29482	7.26563	7.3295	7.00197	7.2135	7.04731	7.21211	7.09154	7.13323	6.90585	7.02568	7.10255	6.8207	6.82357	7.1174	7.01887	7.07973	7.29026	7.02423	6.8382
ILMN_1659623	7.16073	7.0268	7.08192	7.06474	7.02736	7.01894	7.11291	7.02528	7.13008	7.009	6.76955	6.71054	6.74031	6.71641	6.72616	6.63855	6.62708	6.67051	6.57439	6.54194	6.76105	6.71793
ILMN_1659627	7.09753	7.24861	7.16498	7.16965	7.18215	7.11955	7.14254	7.05986	7.14512	7.52381	6.71264	6.77569	6.8574	6.70376	6.874	7.01733	6.77315	6.76298	6.814	6.80304	6.94294	6.99561
ILMN_1659631	7.1042	7.16125	7.03236	7.14254	7.2135	7.06474	7.15232	7.03675	7.01607	7.2135	6.63259	6.66926	6.54574	6.51873	6.49847	6.71376	6.58259	6.65672	6.62822	6.66468	6.66719	6.70965
ILMN_1659639	7.04582	7.1042	7.13008	7.07224	7.26406	7.13759	7.08068	7.1382	7.08956	7.15232	6.65304	6.71186	6.6973	6.65942	6.67697	6.83453	6.81283	6.74399	6.66226	6.62968	6.68044	6.83354
ILMN_1659645	7.12163	7.04731	7.02231	7.12074	7.05493	7.11955	7.09031	7.09337	7.01607	7.07224	6.6642	6.7198	6.81107	6.75516	6.69261	6.8683	6.70566	6.85968	6.70211	6.7616	6.70742	6.82428
ILMN_1659649	7.11366	7.06611	7.13989	7.04793	7.20528	7.1289	7.01743	7.07099	7.06122	7.08192	6.4733	6.78806	6.81456	6.69024	6.70198	6.69024	6.73966	6.82947	6.77546	6.61016	6.62356	6.6889
ILMN_1659659	7.38597	7.04731	7.44873	7.30123	7.25796	7.24685	7.35822	7.5493	7.3295	7.2135	6.82335	6.70078	7.0081	6.9069	7.04872	6.82098	6.97781	7.12564	6.67595	6.94052	6.71559	7.22776
ILMN_1659675	7.07224	7.16965	7.05129	7.08192	7.02736	6.99048	7.05986	7.1289	7.1042	7.10291	6.77938	6.7198	6.7583	6.65166	6.68496	6.73605	6.69024	6.72092	6.74905	6.73226	6.65237	6.58938
ILMN_1659678	7.06249	7.14313	7.08192	7.08192	7.09529	7.08253	7.22527	7.08192	7.17642	7.09154	6.70832	6.65799	6.81107	6.74776	6.83857	6.67762	6.61431	6.74647	6.83171	6.77432	6.65039	6.79694
ILMN_1659682	7.34555	7.25686	7.28583	7.24685	7.26903	7.15344	7.16257	7.08192	7.29221	7.14066	6.89982	6.94765	6.84923	7.11408	6.66406	6.83017	7.01296	6.84981	6.85373	6.99107	6.74905	6.76925
ILMN_1659688	7.64788	7.22762	7.65413	7.46795	7.78722	9.07027	7.52025	8.37126	7.2294	7.76823	7.34908	7.19679	7.34568	7.36002	7.86148	9.97106	7.29896	7.2237	7.82522	7.24787	7.57459	7.58477
ILMN_1659692	7.06249	7.11444	7.2116	7.09529	7.04582	7.02807	7.23522	7.03675	7.01607	7.02964	6.67947	6.73555	6.75563	6.57798	6.62908	6.66636	6.73966	6.65809	6.71519	6.68652	6.62517	6.70965
ILMN_1659693	7.09753	7.12436	7.02231	7.08956	7.20528	7.05656	7.12163	7.11444	7.15344	7.10291	6.68529	6.6642	6.71295	6.65809	6.84773	6.75463	6.75516	6.68529	6.76308	6.7197	6.83475	6.64679
ILMN_1659696	7.1446	7.04731	7.07224	7.11291	7.05493	7.15344	7.05986	7.1042	7.15344	6.99878	6.56883	6.74021	6.58938	6.77188	6.72892	6.64519	6.76308	6.62517	6.77546	6.72485	6.70433	6.71489
ILMN_1659703	8.57081	8.16986	8.69481	8.90164	9.07672	10.2769	8.86363	10.6346	9.02964	10.2987	9.19684	9.32933	9.40286	9.01695	10.5728	10.5473	9.7873	10.8024	10.0132	9.69216	10.1739	10.7883
ILMN_1659725	8.05285	8.00196	8.33064	7.91145	8.07255	7.67584	8.37829	7.43836	8.07861	7.52381	8.23675	7.33275	8.00354	8.08649	7.04732	7.70856	8.21762	7.334	8.05033	8.2473	7.94602	7.42341
ILMN_1659727	7.41931	7.48238	7.26903	7.37134	7.44598	7.51248	7.43654	7.32264	7.3981	7.40157	7.02759	7.30063	7.26625	7.04499	6.82579	7.10484	7.24572	7.36705	6.98575	6.90997	7.0003	7.31825
ILMN_1659737	7.09753	7.0762	7.12074	7.11291	7.1446	7.20684	7.15232	7.1042	7.17642	7.13061	6.71264	6.78358	6.71904	6.71772	6.8207	6.81967	6.79747	6.81958	6.65672	6.89199	7.06632	6.80559
ILMN_1659744	7.22364	7.15232	7.17383	7.16965	7.1382	7.11955	7.20347	7.04731	7.11366	7.13061	6.77315	6.90402	6.87859	6.85373	6.7883	6.96112	6.80798	6.80224	6.87636	6.81805	6.84904	6.81835
ILMN_1659749	7.1446	7.16965	7.07224	7.09529	7.16965	7.04793	7.13061	7.1042	7.08956	7.22527	6.70832	6.78806	6.7416	6.81702	6.67805	6.76797	6.71925	6.73371	6.81511	6.6889	6.74301	6.6307
ILMN_1659752	7.18691	7.22762	7.18215	7.1042	7.07099	7.1446	7.14254	7.11444	7.13872	7.16257	6.75647	6.65281	6.71406	6.8127	6.70198	6.7587	6.8793	6.82447	6.72762	6.79101	6.89236	6.70043
ILMN_1659753	9.20887	9.03465	8.7061	9.28061	8.79645	8.81652	8.76597	8.96785	9.26165	8.96376	9.30671	8.15648	8.39569	9.33403	8.80244	8.84272	8.3729	8.50544	9.1858	9.51018	8.88832	9.09844
ILMN_1659761	7.92606	8.3414	8.17915	8.213	8.20118	8.22688	8.21068	7.93367	8.51475	8.41391	7.69898	8.25759	8.20297	7.47728	7.82823	7.96321	7.92769	7.95783	7.83821	8.03683	8.14287	7.96053
ILMN_1659762	13.0564	13.0045	13.0564	13.1943	13.2605	13.1882	12.9601	12.9536	13.1686	13.2131	12.7987	11.9738	12.3318	12.8513	12.588	11.9512	12.4772	12.4407	12.7171	12.7796	12.3551	12.8047
ILMN_1659766	7.52972	7.41207	7.51909	7.56793	7.65199	7.93256	7.54437	8.53088	7.45315	8.45631	7.36424	7.50898	7.64818	7.20853	8.36491	8.49027	7.84466	8.7344	8.0209	7.88938	7.89368	8.45768
ILMN_1659769	6.99878	7.06611	7.03236	7.2135	7.1042	7.02807	7.09031	7.1042	7.11366	7.009	6.65672	6.72631	6.77895	6.50494	6.63153	6.65237	6.59901	6.69923	6.74905	6.71352	6.75669	6.61231
ILMN_1659770	7.09031	7.11444	7.19138	7.00726	7.09529	7.03737	7.11291	7.11444	6.98011	7.02964	6.72092	6.77432	6.87859	6.69618	6.67697	6.71376	6.75388	6.74399	6.78609	6.75142	6.92385	6.76637
ILMN_1659771	13.7245	13.5581	13.8626	13.4004	13.7946	13.8931	13.7425	13.7245	13.5706	13.7326	13.493	13.493	13.6351	13.4015	13.476	13.3289	13.476	13.7416	13.586	13.5354	13.429	13.6757
ILMN_1659772	7.06249	7.16965	7.18215	7.08192	7.02736	7.20684	7.08068	7.03675	7.1042	7.13061	6.65672	6.7071	6.67356	6.61972	6.70566	6.72343	6.67198	6.61752	6.55147	6.64346	6.66063	6.65304
ILMN_1659773	7.04582	7.0268	7.02231	7.12074	7.02736	7.08253	7.04793	7.04731	7.08956	7.22527	6.69518	6.60285	6.61276	6.62733	6.668	6.59662	6.53243	6.72857	6.72892	6.75142	6.59818	6.72762
ILMN_1659777	7.92606	8.06189	8.11576	8.01168	8.23547	7.5053	8.07055	7.71314	7.9277	7.7106	8.38022	8.29363	8.16468	8.37215	7.63328	7.82769	8.05033	7.71511	7.96732	8.02694	8.16379	7.74605
ILMN_1659781	7.04582	7.1042	7.08192	7.03095	7.1042	7.02807	7.12163	7.15174	7.07099	7.09154	6.68529	6.69036	6.68879	6.63994	6.60526	6.73491	6.59201	6.63139	6.62647	6.61927	6.68848	6.662
ILMN_1659782	8.1697	8.44063	8.50395	8.22942	8.26835	8.92927	8.43013	8.72384	8.21376	8.55841	8.49787	8.9586	9.0773	8.41101	8.66402	8.56429	8.72932	8.51939	8.57749	8.18117	8.7079	8.77451
ILMN_1659786	7.46409	7.46519	7.45378	7.4395	7.37614	7.13759	7.41889	7.1042	7.44914	7.18215	6.978	7.11097	6.95011	7.11579	6.84253	6.7039	6.94714	6.77778	6.99026	6.82264	6.93468	6.77823
ILMN_1659792	7.03737	7.16965	7.07224	7.15098	7.05493	7.28789	7.14254	7.08192	7.18215	7.13061	6.6889	6.85481	6.80531	6.72978	6.65281	6.7039	6.80935	6.57695	6.69271	6.69158	6.94929	6.65166
ILMN_1659800	7.28789	7.37666	7.24582	7.4395	7.53045	9.26517	7.38553	8.75565	7.30123	8.75163	7.55973	7.46394	7.57877	7.42838	8.65776	8.02957	7.74026	8.88136	7.89283	7.90608	7.78473	8.87148
ILMN_1659801	7.5619	7.78176	7.62976	7.69636	7.57069	7.20684	7.51248	7.1289	7.35492	7.14066	7.40033	7.24912	7.31578	7.47728	6.68745	6.66778	7.21023	7.03812	7.0166	7.44702	7.06213	6.86079
ILMN_1659817	7.1446	7.11444	7.07224	7.12074	7.16965	7.07347	7.04793	7.1042	7.14512	7.06122	6.70832	6.67893	6.75088	6.66594	6.70821	6.82612	6.76435	7.0074	6.68735	6.60609	6.75229	6.80559
ILMN_1659820	7.15292	7.05656	7.14838	7.15098	7.16125	7.08253	7.10231	7.11444	7.1042	7.13061	6.75977	6.6448	6.7583	6.70019	6.69394	6.6889	6.64519	6.67438	6.82793	6.61158	6.67731	6.76009
ILMN_1659823	7.12163	7.05656	7.04304	7.06474	7.1382	7.06474	7.14254	7.07099	7.04526	6.99878	6.69518	6.6991	6.9175	6.85273	6.69529	6.77452	6.88808	6.72715	6.78264	6.42684	6.76552	6.86505
ILMN_1659836	7.09031	7.15232	7.03236	6.99798	7.05493	7.11955	7.04793	7.08192	6.99798	7.08192	6.86821	6.67387	6.75444	6.87306	6.72892	6.61611	6.68206	6.81589	6.7071	6.73696	6.83756	6.70509
ILMN_1659843	7.31478	7.34235	7.36582	7.31536	7.42913	9.20254	7.43654	9.10225	7.45315	9.00213	7.19433	6.90585	7.26933	7.19584	8.81997	8.76663	7.265	8.76599	7.85064	7.73789	7.50636	8.49738
[truncated: 46,804 more rows]
