# Supplementary material for: Identification of crucial extracellular genes as potential biomarkers in newly diagnosed Type 1 diabetes via integrated bioinformatics analysis
Source: PeerJ journal article supplement (doi:10.7717/peerj.18660), 2025-01-09
Supplement: Table_S7.xlsx [file Table_S7.xlsx]

## Sheet: Sheet1
group	gender	age	LCN2（ng/mL）
NT1D	female	34	62.35
NT1D	female	26	44.98
NT1D	male	60	87.65
NT1D	female	53	57.64
NT1D	female	23	39.75
NT1D	female	15	340.82
HC	female	13	33.37
HC	male	69	36.83
HC	male	34	25.63
HC	female	25	54.92
HC	female	26	16.17
HC	female	47	35.26
